# Supplementary material for: A Compendium of in vitro Germination Media for Pollen Research
Source: Front Plant Sci. 2021 Jul 9;12:709945. doi: 10.3389/fpls.2021.709945 (PMC8299282; doi:10.3389/fpls.2021.709945)
Supplement: Supplementary Appendix 1 — Compendium of pollen germination media. [file Table_1.XLSX]

## Sheet: Appendix 1
ID	Species name in original publication	Accepted species name (The Plant List)	Cultivated/wild	Angiosperm/Gymnosperm	Family	Dicot/Monocot	Number of cells	Stigma type	Presence of starch in the pollen grain	First author	Year	Availability	Source	Short reference	Agar	Sucrose	H3BO3 (mM)	B (mM)	Ca (mM)	Ca(NO3)2.nH20 (mM)	Ca(NO2)2·4H2O (mM)	CaCO3 (mM)	Ca(OH)₂ (mM)	CaSO4 (mM)	CaCl2.nH20 (mM)	MgSO4.nH20 (mM)	MgCl2 (mM)	MnSO4.nH20 (mM)	MnCl2.nH20 (mM)	KNO3 (mM)	K₂SO₄ (mM)	KH2PO4.nH20 (mM)	KCl (mM)	KI (mM)	FeSO4 x 7H20 (mM)	CuCl2.nH20 (mM)	CuSO4.nH20 (mM)	ZnCl2 (mM)	ZnSO4 x 7H2O (mM)	NH4NO3 (mM)	NH4Cl (mM)	CoCl2 x 6H2O (mM)	C5H12O4 (mM)	Na2MoO4 x 2H20 (mM)	Vitamins (mM)	Aminoacids (%)	Enzymes (%)	Ferric citrate (mM)	Buffer (mM)
1	Prunus amygdalus Batsch	Prunus dulcis (Mill.) D.A.Webb	Cultivated	Angiosperm	Rosaceae	Dicot	Bicellular	Wet	Starchy and starchless	Topdemir	2019	0	https://apps.webofknowledge.com/full_record.do?product=UA&search_mode=GeneralSearch&qid=3&SID=E3BPsI7oeTcFShgwU3h&page=1&doc=1&cacheurlFromRightClick=no	Topdemir, 2019	0	0.1	1.62			1.27						0.81				0.99
2	Prunus domestica L.	Prunus domestica L.	Cultivated	Angiosperm	Rosaceae	Dicot	Bicellular	Wet	Starchy and starchless	Topdemir	2019	0	https://apps.webofknowledge.com/full_record.do?product=UA&search_mode=GeneralSearch&qid=3&SID=E3BPsI7oeTcFShgwU3h&page=1&doc=1&cacheurlFromRightClick=no	Topdemir, 2019	0	0.1	1.62			1.27						0.81				0.99
3	Prunus armenica L.	Prunus armeniaca L.	Cultivated	Angiosperm	Rosaceae	Dicot	Bicellular	Wet	Starchy and starchless	Gur	2019	0	https://apps.webofknowledge.com/full_record.do?product=UA&search_mode=GeneralSearch&qid=3&SID=E3BPsI7oeTcFShgwU3h&page=1&doc=2&cacheurlFromRightClick=no	Gur et al., 2019	0	0.1	1.62			1.27						0.81				0.99
4	Prunus domestica L.	Prunus domestica L.	Cultivated	Angiosperm	Rosaceae	Dicot	Bicellular	Wet	Starchy and starchless	Gur	2019	0	https://apps.webofknowledge.com/full_record.do?product=UA&search_mode=GeneralSearch&qid=3&SID=E3BPsI7oeTcFShgwU3h&page=1&doc=2&cacheurlFromRightClick=no	Gur et al., 2019	0	0.1	1.62			1.27						0.81				0.99
5	Cydonia oblanga Miller	Cydonia oblonga Mill.	Cultivated	Angiosperm	Rosaceae	Dicot	Bicellular	Wet	Starchy and starchless	Gur	2019	0	https://apps.webofknowledge.com/full_record.do?product=UA&search_mode=GeneralSearch&qid=3&SID=E3BPsI7oeTcFShgwU3h&page=1&doc=2&cacheurlFromRightClick=no	Gur et al., 2019	0	0.1	1.62			1.27						0.81				0.99
6	Ochroma pyramidale	Ochroma pyramidale (Cav. ex Lam.) Urb.	Wild	Angiosperm	Malvaceae	Dicot	Bicellular	Dry	Starchy	Zambrano	2019	1	https://scielo.conicyt.cl/scielo.php?script=sci_arttext&pid=S0717-92002019000200227&lng=en&tlng=en&SID=E3BPsI7oeTcFShgwU3h	Zambrano et al., 2019	0	0.1	0.49			2.63
7	Cerasus avium (L.) Moench	Prunus avium (L.) L.	Cultivated	Angiosperm	Rosaceae	Dicot	Bicellular	Wet	Starchy and starchless	Orlova	2019	1	https://elibrary.ru/item.asp?SID=E3BPsI7oeTcFShgwU3h&id=38498697	Orlova et al., 2019	0.006	0.1
8	Pyrus pyrifolia	Pyrus pyrifolia (Burm.f.) Nakai	Cultivated	Angiosperm	Rosaceae	Dicot	Bicellular	Wet	Starchy and starchless	Yang	2019	1	http://www.hst-j.org/articles/xml/DbqJ/	Yang et al., 2019	0.01	0.1	0.4			1
9	Pyrus pyrifolia	Pyrus pyrifolia (Burm.f.) Nakai	Cultivated	Angiosperm	Rosaceae	Dicot	Bicellular	Wet	Starchy and starchless	Yang	2019	1	http://www.hst-j.org/articles/xml/DbqJ/	Yang et al., 2019	0	0.1	0.4			1
10	Spondias mombin L.	Spondias mombin L.	Cultivated	Angiosperm	Anacardiaceae	Dicot	Bicellular	Wet	Starchy and starchless	Zortea	2019	1	http://www.scielo.br/pdf/floram/v26n3/2179-8087-floram-26-3-e20180375.pdf	Zortéa et al., 2019	0	0.1	0.81
11	Actinidia chinensis	Actinidia chinensis Planch.	Cultivated	Angiosperm	Actinidiaceae	Dicot	Bicellular	Dry	NA	Song	2019	1	https://ojs.openagrar.de/index.php/JABFQ/article/view/13363	Song et al., 2019	0.01	0.1
12	Vitis vinifera	Vitis vinifera L.	Cultivated	Angiosperm	Vitaceae	Dicot	Bicellular	Dry	Starchless	Korkutal	2019	1	https://www.agriculturejournals.cz/publicFiles/110_2018-HORTSCI.pdf	Korkutal et al., 2019	0.01	0.15
13	Malus domestica	Malus domestica Borkh.	Cultivated	Angiosperm	Rosaceae	Dicot	Bicellular	Wet	Starchy and starchless	Pavlov	2019	1	https://elibrary.ru/item.asp?id=41857083&SID=E3BPsI7oeTcFShgwU3h	Pavlov et al., 2019	0.008	0.1
14	Cunnighamial lanceolata L.	Cunninghamia lanceolata (Lamb.) Hook.	Cultivated	Gymnosperm	Cupressaceae	NA	NA	NA	NA	Fragallah	2019	1	https://www.mdpi.com/1999-4907/10/2/102/pdf	Fragallah et al., 2019	0.005	0.15	1.62
15	Hydrangea macrophylla	Hydrangea macrophylla (Thunb.) Ser.	Cultivated	Angiosperm	Hydrangeaceae	Dicot	Bicellular	Dry	NA	Alexander	2019	0	https://www.sciencedirect.com/science/article/abs/pii/S030442381830788X	Alexander, 2019	0.005	0.075	4.05			0.61																													10 MES
16	Dichroa febrifuga	Dichroa febrifuga Lour.	Cultivated	Angiosperm	Hydrangeaceae	Dicot	Bicellular	Dry	NA	Alexander	2019	0	https://www.sciencedirect.com/science/article/abs/pii/S030442381830788X	Alexander, 2020	0.005	0.075	4.05			0.61																													10 MES
17	Triticum aestivum L.	Triticum aestivum L.	Cultivated	Angiosperm	Poaceae	Monocot	Tricellular	Dry	NA	Bheemanahalli	2019	0	https://dl.sciencesocieties.org/publications/cs/abstracts/59/2/684?access=0&view=pdf	Bheemanahalli et al., 2019	0	18%(maltose)	0.81			0.13 (4H2O)						0.82 (7H2O)				0.99
18	Calophyllum inophyllum L.	Calophyllum inophyllum L.	Wild	Angiosperm	Calophyllaceae	Dicot	Bicellular	Wet	NA	Furumoto	2019	1	http://www.ffpri.affrc.go.jp/pubs/bulletin/449/documents/449-4.pdf	Furumoto & Kato, 2019	0.01	0.1
19	Lonicera sp.	Lonicera sp.	Cultivated	Angiosperm	Caprifoliaceae	Dicot	Tricellular	Wet	Starchy	Bieniasz	2019	1	https://link.springer.com/article/10.1007%2Fs13580-018-0110-3	Bieniasz et al., 2019	0.006	0.15
20	Caesalpinia gellisii (Hook.) Dietr.	Caesalpinia gilliesii (Hook.)D.Dietr.	Cultivated	Angiosperm	Fabaceae	Dicot	Bicellular	Wet	NA	Perveen	2019	1	http://www.pakbs.org/pjbot/papers/1553774579.pdf	Perveen & Ali, 2019	0	0.1	1.62			1.27						0.81				0.99
21	Caesalpinia pulcherrima (L.) Swartz.	Caesalpinia pulcherrima	Cultivated	Angiosperm	Fabaceae	Dicot	Bicellular	Wet	NA	Perveen	2019	1	http://www.pakbs.org/pjbot/papers/1553774579.pdf	Perveen & Ali, 2019	0	0.1	1.62			1.27						0.81				0.99
22	Nicotiana tabacum	Nicotiana tabacum L.	Cultivated	Angiosperm	Solanaceae	Dicot	Bicellular	Wet	Starchy and starchless	Parotta	2019	0	https://www.sciencedirect.com/science/article/pii/S0168945218314341?via%3Dihub	Parrotta et al., 2019	0	0.12	1.62			1.27						0.81				0.99
23	Torenia fournieri	Torenia fournieri Linden ex E. Fourn.	Wild	Angiosperm	Linderniaceae	Dicot	Bicellular	Dry	NA	Laojunta	2019	1	https://link.springer.com/article/10.1007%2Fs13580-019-00136-6	Laojunta et al., 2019	0	0.1	0.01			0.01						0.01
24	Torenia baillonii	Torenia baillonii	Wild	Angiosperm	Linderniaceae	Dicot	Bicellular	Dry	NA	Laojunta	2019	1	https://link.springer.com/article/10.1007%2Fs13580-019-00136-6	Laojunta et al., 2019	0	0.1	0.01			0.01						0.01
25	Torenia concolor	Torenia concolor Lindl.	Wild	Angiosperm	Linderniaceae	Dicot	Bicellular	Dry	NA	Laojunta	2019	1	https://link.springer.com/article/10.1007%2Fs13580-019-00136-6	Laojunta et al., 2019	0	0.1	0.01			0.01						0.01
26	Torenia hirsutissima	Torenia hirsutissima Bonati	Wild	Angiosperm	Linderniaceae	Dicot	Bicellular	Dry	NA	Laojunta	2019	1	https://link.springer.com/article/10.1007%2Fs13580-019-00136-6	Laojunta et al., 2019	0	0.1	0.01			0.01						0.01
27	Torenia bicolor	Torenia bicolor Dalzell	Wild	Angiosperm	Linderniaceae	Dicot	Bicellular	Dry	NA	Laojunta	2019	1	https://link.springer.com/article/10.1007%2Fs13580-019-00136-6	Laojunta et al., 2019	0	0.1	0.01			0.01						0.01
28	Torenia siamensis	Torenia siamensis T.Yamaz.	Wild	Angiosperm	Linderniaceae	Dicot	Bicellular	Dry	NA	Laojunta	2019	1	https://link.springer.com/article/10.1007%2Fs13580-019-00136-6	Laojunta et al., 2019	0	0.1	0.01			0.01						0.01
29	Picea pungens	Picea pungens Engelm.	Cultivated	Gymnosperm	Pinaceae				NA	Breygina	2019	1	https://link.springer.com/article/10.1007/s00709-018-01333-3	Breygina et al., 2019	0	0.103	1								1																								50 MES-TRIS
30	Mangifera indica L.	Mangifera indica L.	Cultivated	Angiosperm	Anacardiaceae	Dicot	Bicellular	Wet	Starchy and starchless	Perez	2019	0	https://www.sciencedirect.com/science/article/abs/pii/S0304423819303231	Pérez et al., 2019	0	0.15	1.62			2.97 (4H2O)						0.82 (7H2O)				0.99
31	Pistacia vera	Pistacia vera L.	Wild	Angiosperm	Anacardiaceae	Dicot	Bicellular	Wet	Starchy and starchless	Meimand	2019	1	https://link.springer.com/article/10.1007/s10341-019-00427-3	Meimand & Shamshiri, 2019	0.01	0.15	16.18
32	Crocus vernus Hill subsp. vernus	Crocus vernus (L.) Hill subsp. Vernus	Wild	Angiosperm	Iridaceae	Monocot	Bicellular	Dry	Starchless	Chichiricco	2019	1	https://onlinelibrary.wiley.com/doi/full/10.1111/plb.12998	Chichiriccò et al., 2019	0	0.05	1.62								0.69 (2H2O)					0.99
33	Narcissus poeticus L.	Narcissus poeticus L.	Wild	Angiosperm	Amaryllidaceae	Monocot	Bicellular	Dry	Starchless	Chichiricco	2019	1	https://onlinelibrary.wiley.com/doi/full/10.1111/plb.12998	Chichiriccò et al., 2019	0	0.05	1.62								0.69 (2H2O)					0.99
34	Catasetum tabulare Lindl.	Catasetum tabulare Lindl.	Cultivated	Angiosperm	Orchidaceae	Monocot	Bicellular	Wet	Starchless	Bonilla-Sanchez	2019	1	http://www.scielo.org.co/scielo.php?script=sci_arttext&pid=S0370-39082019000300494	Sánchez & Mosquera, 2019	0.01
35	Oncidium sp.	Oncidium sp.	Cultivated	Angiosperm	Orchidaceae	Monocot	Bicellular	Wet	Starchless	Bonilla-Sanchez	2019	1	http://www.scielo.org.co/scielo.php?script=sci_arttext&pid=S0370-39082019000300494	Sánchez & Mosquera, 2019	0.01
36	Anguloa clowesii (Ruiz & Pav.) Lindl.	Anguloa clowesii Lindl.	Cultivated	Angiosperm	Orchidaceae	Monocot	Bicellular	Wet	Starchless	Bonilla-Sanchez	2019	1	http://www.scielo.org.co/scielo.php?script=sci_arttext&pid=S0370-39082019000300494	Sánchez & Mosquera, 2019	0.01
37	Gongora sp.	Gongora sp.	Cultivated	Angiosperm	Orchidaceae	Monocot	Bicellular	Wet	Starchless	Bonilla-Sanchez	2019	1	http://www.scielo.org.co/scielo.php?script=sci_arttext&pid=S0370-39082019000300494	Sánchez & Mosquera, 2019	0.01
38	Cattleya trianae Linden & Rchb.f.	Cattleya trianae Linden & Rchb.f.	Cultivated	Angiosperm	Orchidaceae	Monocot	Bicellular	Wet	Starchless	Bonilla-Sanchez	2019	1	http://www.scielo.org.co/scielo.php?script=sci_arttext&pid=S0370-39082019000300494	Sánchez & Mosquera, 2019	0.01
39	Epidendrum ciliare L.	Epidendrum ciliare L.	Cultivated	Angiosperm	Orchidaceae	Monocot	Bicellular	Wet	Starchless	Bonilla-Sanchez	2019	1	http://www.scielo.org.co/scielo.php?script=sci_arttext&pid=S0370-39082019000300494	Sánchez & Mosquera, 2019	0.01
40	Tectona grandis	Tectona grandis L.f.	Cultivated	Angiosperm	Lamiaceae	Dicot	Bicellular	Dry	NA	Hine	2019	1	https://www.mdpi.com/1999-4907/10/10/908	Hine et al., 2019	0	0.1	1617.34
41	Gossypium hirsutum L.	Gossypium hirsutum L.	Cultivated	Angiosperm	Malvaceae	Dicot	Bicellular	Dry	Starchy	Zhou	2019	1	https://acsess.onlinelibrary.wiley.com/doi/full/10.2134/agronj2019.03.0150	Zhou et al., 2019	0	0.4	3.24			2.44								4.64																		0.01% serine, 0.01% glutamate, 0.01% lysine, 0.01% proline,
42	Citrullus lanatus	Citrullus lanatus (Thunb.) Matsum. & Nakai	Cultivated	Angiosperm	Cucurbitaceae	Dicot	Bicellular	Dry	Starchy and starchless	Tonfack	2019	1	https://jabonline.in/admin/php/uploads/406_pdf.pdf	Tonfack et al., 2019	0.01	0.002	0.33			0.26						0.09 (7H2O)				0.1
43	Picea omorica	Picea omorika (Pancic) Purk.	Wild	Gymnosperm	Pinaceae				NA	Batos	2019	1	https://www.tandfonline.com/doi/full/10.1080/00173134.2019.1668053	Batos & Miljković, 2019	0	0.05
44	Picea omorica	Picea omorika (Pancic) Purk.	Wild	Gymnosperm	Pinaceae				NA	Batos	2019	1	https://www.tandfonline.com/doi/full/10.1080/00173134.2019.1668053	Batos & Miljković, 2019	0	0.1
45	Picea omorica	Picea omorika (Pancic) Purk.	Wild	Gymnosperm	Pinaceae				NA	Batos	2019	1	https://www.tandfonline.com/doi/full/10.1080/00173134.2019.1668053	Batos & Miljković, 2019	0	0.15
46	Picea omorica	Picea omorika (Pancic) Purk.	Wild	Gymnosperm	Pinaceae				NA	Batos	2019	1	https://www.tandfonline.com/doi/full/10.1080/00173134.2019.1668053	Batos & Miljković, 2019	0	0.2
47	Plantago lanceolata	Plantago lanceolata L.	Wild	Angiosperm	Plantaginaceae	Dicot	Mixed	Dry	Starchy	Gonzalez-Parrado	2019	1	https://www.tandfonline.com/doi/full/10.1080/00173134.2019.1675754	González-Parrado et al., 2019	0.007
48	Hippeastrum sp.	Hippeastrum sp.	Cultivated	Angiosperm	Amaryllidaceae	Monocot	Bicellular	Dry	Starchless	Vallado de Almeida	2019	1	http://www.scielo.br/pdf/rceres/v66n6/0034-737X-rceres-66-06-451.pdf	Almeida et al., 2019	0.3% (geltrine)	0.1	3.24			4.88
49	Olea europaea	Olea europaea L.	Cultivated	Angiosperm	Oleaceae	Dicot	Bicellular	Dry	NA	Khaleghi	2019	0	https://www.sciencedirect.com/science/article/abs/pii/S0254629918314364	Khaleghi et al., 2019	0.01	0.15	1.62
50	Malus sylvestris	Malus sylvestris (L.) Mill.	Wild	Angiosperm	Rosaceae	Dicot	Bicellular	Wet	Starchy and starchless	Beltran	2019	1	https://peerj.com/articles/8195.pdf	Beltrán et al., 2019	0.1 % (agarose)	0.1	1.62			1.83										0.99
51	Pyrus communis	Pyrus communis L.	Cultivated	Angiosperm	Rosaceae	Dicot	Bicellular	Wet	Starchy and starchless	Beltran	2019	1	https://peerj.com/articles/8195.pdf	Beltrán et al., 2019	0.1 % (agarose)	0.1	1.62			1.83										0.99
52	Prunus cerasifera	Prunus cerasifera Ehrh.	Cultivated	Angiosperm	Rosaceae	Dicot	Bicellular	Wet	Starchy and starchless	Beltran	2019	1	https://peerj.com/articles/8195.pdf	Beltrán et al., 2019	0.1 % (agarose)	0.1	1.62			1.83										0.99
53	Prunus avium	Prunus avium (L.) L.	Cultivated	Angiosperm	Rosaceae	Dicot	Bicellular	Wet	Starchy and starchless	Beltran	2019	1	https://peerj.com/articles/8195.pdf	Beltrán et al., 2019	0.1 % (agarose)	0.1	1.62			1.83										0.99
54	Prunus domestica L.	Prunus domestica L.	Cultivated	Angiosperm	Rosaceae	Dicot	Bicellular	Wet	Starchy and starchless	Beltran	2019	1	https://peerj.com/articles/8195.pdf	Beltrán et al., 2019	0.1 % (agarose)	0.1	1.62			1.83										0.99
55	Prunus dulcis	Prunus dulcis (Mill.) D.A.Webb	Cultivated	Angiosperm	Rosaceae	Dicot	Bicellular	Wet	Starchy and starchless	Beltran	2019	1	https://peerj.com/articles/8195.pdf	Beltrán et al., 2019	0.1 % (agarose)	0.1	1.62			1.83										0.99
56	Prunus persica	Prunus persica (L.) Batsch	Cultivated	Angiosperm	Rosaceae	Dicot	Bicellular	Wet	Starchy and starchless	Beltran	2019	1	https://peerj.com/articles/8195.pdf	Beltrán et al., 2019	0.1 % (agarose)	0.1	1.62			1.83										0.99
57	Cucurbita pepo	Cucurbita pepo L.	Cultivated	Angiosperm	Cucurbitaceae	Dicot	Bicellular	Dry	Starchy and starchless	Castetter	1928	0	https://apps.webofknowledge.com/full_record.do?product=UA&search_mode=GeneralSearch&qid=65&SID=E3BPsI7oeTcFShgwU3h&page=1&doc=4&cacheurlFromRightClick=no	Castetter, 1928	0.02	0.14
58	Cucurnbita moschata	Cucurbita moschata Duchesne	Cultivated	Angiosperm	Cucurbitaceae	Dicot	Bicellular	Dry	Starchy and starchless	Castetter	1928	0	https://apps.webofknowledge.com/full_record.do?product=UA&search_mode=GeneralSearch&qid=65&SID=E3BPsI7oeTcFShgwU3h&page=1&doc=4&cacheurlFromRightClick=no	Castetter, 1928	0.02	0.14
59	Solanum tuberosum L.	Solanum tuberosum L.	Cultivated	Angiosperm	Solanaceae	Dicot	Bicellular	Wet	Starchy and starchless	Kessler	1930	0	https://apps.webofknowledge.com/full_record.do?product=UA&search_mode=GeneralSearch&qid=70&SID=E3BPsI7oeTcFShgwU3h&page=1&doc=1&cacheurlFromRightClick=no	Kessler, 1930	0.006	0.2																															Amylase 0.002%
60	Gossypium	Gossypium sp.	Cultivated	Angiosperm	Malvaceae	Dicot	Bicellular	Dry	Starchy	Shibuya	1930	0	https://apps.webofknowledge.com/full_record.do?product=UA&search_mode=GeneralSearch&qid=70&SID=E3BPsI7oeTcFShgwU3h&page=1&doc=3&cacheurlFromRightClick=no	Shibuya, 1930	0.05	0.35
61	Hevea sp.	Hevea sp.	Wild	Angiosperm	Euphorbiaceae	Dicot	Tricellular	Dry	Starchy	Ramaer	1932	0	https://apps.webofknowledge.com/full_record.do?product=UA&search_mode=GeneralSearch&qid=73&SID=E3BPsI7oeTcFShgwU3h&page=1&doc=1&cacheurlFromRightClick=no	Ramaer, 1932	0.02	0.19
62	Lathyrus odoratus	Lathyrus odoratus L.	Cultivated	Angiosperm	Fabaceae	Dicot	Bicellular	Wet	NA	Bungenberg de Young	1934	1	http://natuurtijdschriften.nl/download?type=document&docid=552422	de Jong & Hennemann, 1934	0	0.15
63	Narcissus poeticus L.	Narcissus poeticus L.	Wild	Angiosperm	Amaryllidaceae	Monocot	Bicellular	Dry	Starchless	Kostriukova	1939	0	https://apps.webofknowledge.com/full_record.do?product=UA&search_mode=GeneralSearch&qid=93&SID=E3BPsI7oeTcFShgwU3h&page=1&doc=2&cacheurlFromRightClick=no	Kostriukova & Benetskaia, 1939	0.01	0.1
64	Fragaria × ananassa	Fragaria x ananassa (Duchesne ex Weston) Duchesne ex Rozier	Cultivated	Angiosperm	Rosaceae	Dicot	Bicellular	Wet	Starchy and starchless	Herold	1941	0	https://apps.webofknowledge.com/full_record.do?product=UA&search_mode=GeneralSearch&qid=100&SID=E3BPsI7oeTcFShgwU3h&page=1&doc=2&cacheurlFromRightClick=no	Herold, 1941	0	0.15
65	Antirrhinum majus	Antirrhinum majus L.	Wild	Angiosperm	Plantaginaceae	Dicot	Bicellular	Dry	Starchy	Smith	1942	0	https://www.jstor.org/stable/pdf/2436543.pdf?refreqid=excelsior%3Ac5fa58b4e9058ac23bd11be13b6791ff	Smith, 1942	0.0075	0.1
66	Bryophyllum daegremontianum	Bryophyllum daigremontianum (Raym.-Hamet & Perrier) A.Berger	Wild	Angiosperm	Crassulaceae	Dicot	Bicellular	Wet	Starchless	Smith	1942	0	https://www.jstor.org/stable/pdf/2436543.pdf?refreqid=excelsior%3Ac5fa58b4e9058ac23bd11be13b6791ff	Smith, 1942	0.0075	0.03
67	Pinus strobus	Pinus strobus L.	Wild	Gymnosperm	Pinaceae				NA	Johnson	1943	0	https://www.nrcresearchpress.com/doi/pdf/10.1139/cjr43c-028	Johnson, 1943	0.0075	0.1
68	Pinus resinosa	Pinus resinosa Aiton	Wild	Gymnosperm	Pinaceae				NA	Johnson	1943	0	https://www.nrcresearchpress.com/doi/pdf/10.1139/cjr43c-028	Johnson, 1943	0.0075	0.1
69	Pinus sylvestris	Pinus sylvestris L.	Wild	Gymnosperm	Pinaceae				NA	Johnson	1943	0	https://www.nrcresearchpress.com/doi/pdf/10.1139/cjr43c-028	Johnson, 1943	0.0075	0.1
70	Pinus banksiana	Pinus banksiana Lamb.	Wild	Gymnosperm	Pinaceae				NA	Johnson	1943	0	https://www.nrcresearchpress.com/doi/pdf/10.1139/cjr43c-028	Johnson, 1943	0.0075	0.1
71	Pinus attenuata	Pinus attenuata Lemmon	Wild	Gymnosperm	Pinaceae				NA	Johnson	1943	0	https://www.nrcresearchpress.com/doi/pdf/10.1139/cjr43c-028	Johnson, 1943	0.0075	0.1
72	Pinus radiata	Pinus radiata D.Don	Wild	Gymnosperm	Pinaceae				NA	Johnson	1943	0	https://www.nrcresearchpress.com/doi/pdf/10.1139/cjr43c-028	Johnson, 1943	0.0075	0.1
73	Picea abies	Picea abies (L.) H.Karst.	Wild	Gymnosperm	Pinaceae				NA	Johnson	1943	0	https://www.nrcresearchpress.com/doi/pdf/10.1139/cjr43c-028	Johnson, 1943	0.0075	0.1
74	Picea glauca	Picea glauca (Moench) Voss	Wild	Gymnosperm	Pinaceae				NA	Johnson	1943	0	https://www.nrcresearchpress.com/doi/pdf/10.1139/cjr43c-028	Johnson, 1943	0.0075	0.1
75	Vinca rosea L.	Catharanthus roseus (L.) G.Don	Cultivated	Angiosperm	Apocynaceae	Dicot	Bicellular	Dry and wet	Starchless	Beams	1944	1	https://onlinelibrary.wiley.com/doi/epdf/10.1002/jcp.1030230203	Beams & King, 1944	0.01	0.1
76	Pinus montana Mill.	Pinus mugo Turra	Wild	Gymnosperm	Pinaceae				NA	Kuhlwein	1946	1	https://www.jstor.org/stable/pdf/23357811.pdf?refreqid=excelsior%3A1ed3e8b989ec69658e1b5a700224f560	Kühlwein, 1946	0	0.01
77	Picea excelsa (Lam.) Link	Picea abies (L.) H.Karst.	Wild	Gymnosperm	Pinaceae				NA	Kuhlwein	1946	1	https://www.jstor.org/stable/pdf/23357811.pdf?refreqid=excelsior%3A1ed3e8b989ec69658e1b5a700224f560	Kühlwein, 1946	0	0.05
78	Lilium candidum	Lilium candidum L.	Cultivated	Angiosperm	Liliaceae	Monocot	Bicellular	Wet	Starchless	Kuhlwein	1946	1	https://www.jstor.org/stable/pdf/23357811.pdf?refreqid=excelsior%3A1ed3e8b989ec69658e1b5a700224f560	Kühlwein, 1946	0	0.02
79	Pinus sylvestris	Pinus sylvestris L.	Wild	Gymnosperm	Pinaceae				NA	Marcet	1951	1	https://www.research-collection.ethz.ch/bitstream/handle/20.500.11850/137722/eth-36008-02.pdf?sequence=2&isAllowed=y	Marcet, 1951	0
80	Coffea arabica var. rugosa	Coffea arabica L.	Cultivated	Angiosperm	Rubiaceae	Dicot	Bicellular	Dry	Starchless	Medina, Dixier M.	1950	1	https://apps.webofknowledge.com/full_record.do?product=UA&search_mode=GeneralSearch&qid=2&SID=E46aWYBSVZTd8ejqbt1&page=1&doc=4&cacheurlFromRightClick=no	Medina, 1950	0.005	0.15
81	Prunus persica	Prunus persica (L.) Batsch	Cultivated	Angiosperm	Rosaceae	Dicot	Bicellular	Wet	Starchy and starchless	Oberle	1953	0	https://apps.webofknowledge.com/full_record.do?product=UA&search_mode=GeneralSearch&qid=7&SID=E46aWYBSVZTd8ejqbt1&page=1&doc=5&cacheurlFromRightClick=no	Oberle & Richard, 1953	0.01	0.1																																10.21
82	Pyrus sp.	Pyrus sp.	Cultivated	Angiosperm	Rosaceae	Dicot	Bicellular	Wet	Starchy and starchless	Oberle	1953	0	https://apps.webofknowledge.com/full_record.do?product=UA&search_mode=GeneralSearch&qid=7&SID=E46aWYBSVZTd8ejqbt1&page=1&doc=5&cacheurlFromRightClick=no	Oberle & Richard, 1953	0.01	0.1
83	Malus domestica	Malus domestica Borkh.	Cultivated	Angiosperm	Rosaceae	Dicot	Bicellular	Wet	Starchy and starchless	Oberle	1953	0	https://apps.webofknowledge.com/full_record.do?product=UA&search_mode=GeneralSearch&qid=7&SID=E46aWYBSVZTd8ejqbt1&page=1&doc=5&cacheurlFromRightClick=no	Oberle & Richard, 1953	0.01	0.1
84	Vitis vinifera	Vitis vinifera L.	Cultivated	Angiosperm	Vitaceae	Dicot	Bicellular	Dry	Starchless	Oberle	1953	0	https://apps.webofknowledge.com/full_record.do?product=UA&search_mode=GeneralSearch&qid=7&SID=E46aWYBSVZTd8ejqbt1&page=1&doc=5&cacheurlFromRightClick=no	Oberle & Richard, 1953	0.01	0.1
85	Cucumis melo L.	Cucumis melo L.	Cultivated	Angiosperm	Cucurbitaceae	Dicot	Bicellular	Dry	Starchy and starchless	Tanaka	1953	0	https://apps.webofknowledge.com/full_record.do?product=UA&search_mode=GeneralSearch&qid=7&SID=E46aWYBSVZTd8ejqbt1&page=1&doc=6&cacheurlFromRightClick=no	Tanaka & Mamoru, 1953	0.01	0.15
86	Lilium longiflorum	Lilium longiflorum Thunb.	Wild	Angiosperm	Liliaceae	Monocot	Bicellular	Wet	Starchless	Kato	1954	0	https://www.journals.uchicago.edu/doi/pdfplus/10.1086/335884	Kato, 1954	0.02	0.08
87	Solanum pinnatisectum	Solanum pinnatisectum Dunal	Wild	Angiosperm	Solanaceae	Dicot	Bicellular	Wet	Starchy and starchless	Swaminathan	1955	1	https://www.nature.com/articles/176887b0.pdf	Rubbo & Cymerman-Craig, 1955	0.02	0.1
88	Solanum bulbocastanum	Solanum bulbocastanum Dunal	Wild	Angiosperm	Solanaceae	Dicot	Bicellular	Wet	Starchy and starchless	Swaminathan	1955	1	https://www.nature.com/articles/176887b0.pdf	Rubbo & Cymerman-Craig, 1955	0.02	0.1
89	Solanum lanciforme	Solanum lanciforme Rydb.	Wild	Angiosperm	Solanaceae	Dicot	Bicellular	Wet	Starchy and starchless	Swaminathan	1955	1	https://www.nature.com/articles/176887b0.pdf	Rubbo & Cymerman-Craig, 1955	0.02	0.1
90	Solanum polyadenium	Solanum polyadenium Greenm.	Wild	Angiosperm	Solanaceae	Dicot	Bicellular	Wet	Starchy and starchless	Swaminathan	1955	1	https://www.nature.com/articles/176887b0.pdf	Rubbo & Cymerman-Craig, 1955	0.02	0.1
91	Sesbania aculeata (Willd.) Pers.	Sesbania bispinosa (Jacq.) W.Wight	Wild	Angiosperm	Fabaceae	Dicot	Bicellular	Wet	NA	Singh	1957	0	https://apps.webofknowledge.com/full_record.do?product=UA&search_mode=GeneralSearch&qid=2&SID=C4G7SyX1lth5Fiq7lRL&page=1&doc=1&cacheurlFromRightClick=no	Singh, 1957	0.01	0.12
92	Crotalaria juncea Linn	Crotalaria juncea L.	Cultivated	Angiosperm	Fabaceae	Dicot	Bicellular	Wet	NA	Singh	1957	0	https://apps.webofknowledge.com/full_record.do?product=UA&search_mode=GeneralSearch&qid=2&SID=C4G7SyX1lth5Fiq7lRL&page=1&doc=1&cacheurlFromRightClick=no	Singh, 1957	0.01	0.14
93	Tecoma radicans (L.) Juss.	Campsis radicans (L.) Seem.	Wild	Angiosperm	Bignoniaceae	Dicot	Bicellular	Wet	Starchy and starchless	O'Kelley	1957	0	https://bsapubs.onlinelibrary.wiley.com/doi/epdf/10.1002/j.1537-2197.1957.tb08236.x	O'Kelley, 1957	0	0.11	0.81
94	Pinus palustris	Pinus palustris Mill.	Wild	Gymnosperm	Pinaceae				NA	Dillon	1957	1	https://apps.webofknowledge.com/full_record.do?product=UA&search_mode=GeneralSearch&qid=2&SID=C4G7SyX1lth5Fiq7lRL&page=1&doc=7&cacheurlFromRightClick=no	Dillon & Zobel, 1957	0
95	Pinus taeda	Pinus taeda L.	Wild	Gymnosperm	Pinaceae				NA	Dillon	1957	1	https://apps.webofknowledge.com/full_record.do?product=UA&search_mode=GeneralSearch&qid=2&SID=C4G7SyX1lth5Fiq7lRL&page=1&doc=7&cacheurlFromRightClick=no	Dillon & Zobel, 1957	0
96	Pinus elliottii	Pinus elliottii Engelm.	Wild	Gymnosperm	Pinaceae				NA	Dillon	1957	1	https://apps.webofknowledge.com/full_record.do?product=UA&search_mode=GeneralSearch&qid=2&SID=C4G7SyX1lth5Fiq7lRL&page=1&doc=7&cacheurlFromRightClick=no	Dillon & Zobel, 1957	0
97	Pinus densiflora	Pinus densiflora Siebold & Zucc.	Wild	Gymnosperm	Pinaceae				NA	Dillon	1957	1	https://apps.webofknowledge.com/full_record.do?product=UA&search_mode=GeneralSearch&qid=2&SID=C4G7SyX1lth5Fiq7lRL&page=1&doc=7&cacheurlFromRightClick=no	Dillon & Zobel, 1957	0
98	Pinus glabra	Pinus glabra Walter	Wild	Gymnosperm	Pinaceae				NA	Dillon	1957	1	https://apps.webofknowledge.com/full_record.do?product=UA&search_mode=GeneralSearch&qid=2&SID=C4G7SyX1lth5Fiq7lRL&page=1&doc=7&cacheurlFromRightClick=no	Dillon & Zobel, 1957	0
99	Hordeum vulgare	Hordeum vulgare L.	Cultivated	Angiosperm	Poaceae	Monocot	Tricellular	Dry	NA	Hozumi	1957	0	https://apps.webofknowledge.com/full_record.do?product=UA&search_mode=GeneralSearch&qid=2&SID=C4G7SyX1lth5Fiq7lRL&page=1&doc=8&cacheurlFromRightClick=no	Hozumi & Igasaki, 1957	0	0.15
100	Pisum sativum	Pisum sativum	Cultivated	Angiosperm	Fabaceae	Dicot	Bicellular	Wet	NA	Warnock	1956	0	https://apps.webofknowledge.com/full_record.do?product=UA&search_mode=GeneralSearch&qid=2&SID=C4G7SyX1lth5Fiq7lRL&page=1&doc=9&cacheurlFromRightClick=no	Warnock & Hagedorn, 1956	0.01	0.15
101	Arachis hypogaea L.	Arachis hypogaea L.	Cultivated	Angiosperm	Fabaceae	Dicot	Bicellular	Wet	NA	Oakes	1958	0	https://dl.sciencesocieties.org/publications/aj/abstracts/50/7/AJ0500070387	Oakes, 1958	0.01	0.08
102	Phaseolus radiatus L.	Vigna radiata (L.)R.Wilczek	Cultivated	Angiosperm	Fabaceae	Dicot	Bicellular	Wet	NA	Tasaki	1958	0	https://apps.webofknowledge.com/full_record.do?product=UA&search_mode=GeneralSearch&qid=15&SID=C4G7SyX1lth5Fiq7lRL&page=1&doc=3&cacheurlFromRightClick=no	Tasaki, 1958	0.01	0.3
103	Paspalum dilatatum	Paspalum dilatatum Poir.	Wild	Angiosperm	Poaceae	Monocot	Tricellular	Dry	NA	Bennett	1959	0	https://acsess.onlinelibrary.wiley.com/doi/epdf/10.2134/agronj1959.00021962005100020015x	Bennett, 1959	0	0.15
104	Carica papaya	Carica papaya L.	Cultivated	Angiosperm	Caricaceae	Dicot	Bicellular	Dry	NA	Singh	1959	0	https://apps.webofknowledge.com/full_record.do?product=UA&search_mode=GeneralSearch&qid=20&SID=C4G7SyX1lth5Fiq7lRL&page=1&doc=7&cacheurlFromRightClick=no	Singh, 1959	0.01	0.05
105	Areca catechu	Areca catechu L.	Cultivated	Angiosperm	Arecaceae	Monocot	Bicellular	Dry	NA	Raghavan	1959	1	https://onlinelibrary.wiley.com/doi/epdf/10.1111/j.1399-3054.1959.tb07966.x	Raohavan & Baruah, 1959	0	0.008
106	Pistacia vera	Pistacia vera L.	Cultivated	Angiosperm	Anacardiaceae	Dicot	Bicellular	Wet	Starchy and starchless	Ayeer	1959	0	https://apps.webofknowledge.com/full_record.do?product=UA&search_mode=GeneralSearch&qid=20&SID=C4G7SyX1lth5Fiq7lRL&page=2&doc=13&cacheurlFromRightClick=no	Mahmut, 1959	0	0.15	1.62
107	Benincasa hispida	Benincasa hispida (Thunb.) Cogn.	Cultivated	Angiosperm	Cucurbitaceae	Dicot	Bicellular	Dry	Starchy and starchless	Vasil	1960	0	https://bsapubs.onlinelibrary.wiley.com/doi/epdf/10.1002/j.1537-2197.1960.tb07120.x	Vasil, 1960	0	0.1	1.62
108	Citrullus vulgaris Schrad.	Citrullus lanatus (Thunb.) Matsum. & Nakai	Cultivated	Angiosperm	Cucurbitaceae	Dicot	Bicellular	Dry	Starchy and starchless	Vasil	1960	0	https://bsapubs.onlinelibrary.wiley.com/doi/epdf/10.1002/j.1537-2197.1960.tb07120.x	Vasil, 1960	0	0.075	1.62
109	Cucumis melo L.	Cucumis melo L.	Cultivated	Angiosperm	Cucurbitaceae	Dicot	Bicellular	Dry	Starchy and starchless	Vasil	1960	0	https://bsapubs.onlinelibrary.wiley.com/doi/epdf/10.1002/j.1537-2197.1960.tb07120.x	Vasil, 1960	0	0.2	1.62
110	Cucurmis melo var. momordica Roxb.	Cucumis melo var. momordica (Roxb.) Duthie & Fuller	Cultivated	Angiosperm	Cucurbitaceae	Dicot	Bicellular	Dry	Starchy and starchless	Vasil	1960	0	https://bsapubs.onlinelibrary.wiley.com/doi/epdf/10.1002/j.1537-2197.1960.tb07120.x	Vasil, 1960	0	0.075	1.62
111	Cucumis melo var. utilissimus Roxb.	Cucumis melo var. utilissimus (Roxb.) Duthie & J.B.Fuller	Cultivated	Angiosperm	Cucurbitaceae	Dicot	Bicellular	Dry	Starchy and starchless	Vasil	1960	0	https://bsapubs.onlinelibrary.wiley.com/doi/epdf/10.1002/j.1537-2197.1960.tb07120.x	Vasil, 1960	0	0.15	1.62
112	Lagenaria vulgaris Ser.	Lagenaria siceraria (Molina) Standl.	Cultivated	Angiosperm	Cucurbitaceae	Dicot	Bicellular	Dry	Starchy and starchless	Vasil	1960	0	https://bsapubs.onlinelibrary.wiley.com/doi/epdf/10.1002/j.1537-2197.1960.tb07120.x	Vasil, 1960	0	0.35	1.62
113	Luffa acutangula Roxb.	Luffa acutangula (L.) Roxb.	Cultivated	Angiosperm	Cucurbitaceae	Dicot	Bicellular	Dry	Starchy and starchless	Vasil	1960	0	https://bsapubs.onlinelibrary.wiley.com/doi/epdf/10.1002/j.1537-2197.1960.tb07120.x	Vasil, 1960	0	0.1	1.62
114	Luffa cylindrica M. Roem.	Luffa cylindrica (L.) M.Roem.	Cultivated	Angiosperm	Cucurbitaceae	Dicot	Bicellular	Dry	Starchy and starchless	Vasil	1960	0	https://bsapubs.onlinelibrary.wiley.com/doi/epdf/10.1002/j.1537-2197.1960.tb07120.x	Vasil, 1960	0	0.15	1.62
115	Momordica charantia L.	Momordica charantia L.	Cultivated	Angiosperm	Cucurbitaceae	Dicot	Bicellular	Dry	Starchy and starchless	Vasil	1960	0	https://bsapubs.onlinelibrary.wiley.com/doi/epdf/10.1002/j.1537-2197.1960.tb07120.x	Vasil, 1960	0	0.1	1.62
116	Prunus amygdalus Batsch	Prunus dulcis (Mill.) D.A.Webb	Cultivated	Angiosperm	Rosaceae	Dicot	Bicellular	Wet	Starchy and starchless	Singh	1960	0	https://apps.webofknowledge.com/full_record.do?product=UA&search_mode=GeneralSearch&qid=28&SID=C4G7SyX1lth5Fiq7lRL&page=1&doc=3&cacheurlFromRightClick=no	Singh, 1960	0.01	0.1
117	Phormium tenax	Phormium tenax J.R.Forst. & G.Forst.	Wild	Angiosperm	Asphodelaceae	Monocot	NA	NA	NA	Puri	1960	1	https://ir.library.oregonstate.edu/downloads/ff365833j	Puri, 1960	0.01	0.1
118	Oenothera hookeri Torr. & A. Gray	Oenothera elata Kunth	Wild	Angiosperm	Onagraceae	Dicot	Bicellular	Wet	Starchy	Glenk	1960	0	https://www.sciencedirect.com/science/article/abs/pii/S0367161517331622	Glenk, 1960	5% (gelatine)	0.08	1.62																														yeast extract 0.1%
119	Oenothera scabra	Oenothera scabra K. Krause	Wild	Angiosperm	Onagraceae	Dicot	Bicellular	Wet	Starchy	Glenk	1960	0	https://www.sciencedirect.com/science/article/abs/pii/S0367161517331622	Glenk, 1960	5% (gelatine)	0.08	1.62																														yeast extract 0.1%
120	Oenothera longitlora	Oenothera longiflora L.	Wild	Angiosperm	Onagraceae	Dicot	Bicellular	Wet	Starchy	Glenk	1960	0	https://www.sciencedirect.com/science/article/abs/pii/S0367161517331622	Glenk, 1960	5% (gelatine)	0.08	1.62																														yeast extract 0.1%
121	Oenothera odorata	Oenothera odorata Jacq.	Wild	Angiosperm	Onagraceae	Dicot	Bicellular	Wet	Starchy	Glenk	1960	0	https://www.sciencedirect.com/science/article/abs/pii/S0367161517331622	Glenk, 1960	5% (gelatine)	0.08	1.62																														yeast extract 0.1%
122	Prunus avium L.	Prunus avium (L.) L.	Cultivated	Angiosperm	Rosaceae	Dicot	Bicellular	Wet	Starchy and starchless	Eaton	1961	1	https://www.nrcresearchpress.com/doi/pdf/10.4141/cjps61-110	Eaton, 1961	0.0075	0.1	0.05
123	Medicago sativa L.	Medicago sativa L.	Cultivated	Angiosperm	Fabaceae	Dicot	Bicellular	Wet	NA	Koffman	1961	1	http://pdfs.semanticscholar.org/c194/379089d716747025ac49f73a53a897848b16.pdf	Koffman & Wilsie, 1961	0.015	0.12
124	Festuca pratensis	Festuca pratensis Huds.	Wild	Angiosperm	Poaceae	Monocot	Tricellular	Dry	NA	Lundqvist	1961	1	https://onlinelibrary.wiley.com/doi/epdf/10.1111/j.1601-5223.1961.tb01796.x	Lundqvist, 1961	0.02	0.1	1.62
125	Hordeum bulbosum	Hordeum bulbosum L.	Cultivated	Angiosperm	Poaceae	Monocot	Tricellular	Dry	NA	Lundqvist	1961	1	https://onlinelibrary.wiley.com/doi/epdf/10.1111/j.1601-5223.1961.tb01796.x	Lundqvist, 1961	0.02	0.1	1.62
126	Secale cereale	Secale cereale L.	Cultivated	Angiosperm	Poaceae	Monocot	Tricellular	Dry	NA	Lundqvist	1961	1	https://onlinelibrary.wiley.com/doi/epdf/10.1111/j.1601-5223.1961.tb01796.x	Lundqvist, 1961	0.02	0.1	1.62
127	Ornithogalum caudatum Aiton	Albuca bracteata (Thunb.) J.C.Manning & Goldblatt	Wild	Angiosperm	Asparagaceae	Monocot	Bicellular	Dry	NA	Goss	1962	0	https://apps.webofknowledge.com/full_record.do?product=UA&search_mode=GeneralSearch&qid=13&SID=D6l5HCkDXi5YhGZgnLg&page=1&doc=8&cacheurlFromRightClick=no	Goss, 1962	0	0.1				23.13 (4H2O)						12.34 (7H2O)			0.003 (4H2O)	39.57		3.68			0.02	0.001 (2H2O)		0.01
128	Theobroma cacao	Theobroma cacao L.	Cultivated	Angiosperm	Malvaceae	Dicot	Bicellular	Dry	Starchy	Varas	1962	0	https://apps.webofknowledge.com/full_record.do?product=UA&search_mode=GeneralSearch&qid=13&SID=D6l5HCkDXi5YhGZgnLg&page=1&doc=9&cacheurlFromRightClick=no	Varas, 1962	0.02	0.1
129	Zea mays	Zea mays L.	Cultivated	Angiosperm	Poaceae	Monocot	Tricellular	Dry	NA	Cook	1965	0	https://apps.webofknowledge.com/full_record.do?product=UA&search_mode=GeneralSearch&qid=19&SID=D6l5HCkDXi5YhGZgnLg&page=1&doc=4&cacheurlFromRightClick=no	Cook & Walden, 1965	0	0.12	1.62								2.71
130	Zea mays	Zea mays L.	Cultivated	Angiosperm	Poaceae	Monocot	Tricellular	Dry	NA	Cook	1965	0	https://apps.webofknowledge.com/full_record.do?product=UA&search_mode=GeneralSearch&qid=19&SID=D6l5HCkDXi5YhGZgnLg&page=1&doc=4&cacheurlFromRightClick=no	Cook & Walden, 1965	0.0075	0.12	1.62								2.71
131	Secale cereale L.	Secale cereale L.	Cultivated	Angiosperm	Poaceae	Monocot	Tricellular	Dry	NA	Pfahler	1965	0	https://apps.webofknowledge.com/full_record.do?product=UA&search_mode=GeneralSearch&qid=19&SID=D6l5HCkDXi5YhGZgnLg&page=1&doc=7&cacheurlFromRightClick=no	Pfahler, 1965	0.035	0.25	3.24
132	Petunia sp.	Petunia sp.	Cultivated	Angiosperm	Solanaceae	Dicot	Bicellular	Wet	Starchy and starchless	Stanley	1965	0	https://onlinelibrary.wiley.com/doi/epdf/10.1111/j.1399-3054.1965.tb06868.x	Stanley & Linskens, 1965	0	0.137	0.33
133	Corchorus depressus (L.) C. Christensen	Corchorus depressus (L.) Stocks	Wild	Angiosperm	Malvaceae	Dicot	Bicellular	Dry	Starchy	Khan	1965	0	https://apps.webofknowledge.com/full_record.do?product=UA&search_mode=GeneralSearch&qid=19&SID=D6l5HCkDXi5YhGZgnLg&page=2&doc=13&cacheurlFromRightClick=no	Khan, 1965	0.02	0.2
134	Asparagus officinalis L.	Asparagus officinalis L.	Cultivated	Angiosperm	Asparagaceae	Monocot	Bicellular	Dry	NA	Snope	1963	0	https://apps.webofknowledge.com/full_record.do?product=UA&search_mode=GeneralSearch&qid=35&SID=D6l5HCkDXi5YhGZgnLg&page=1&doc=7&cacheurlFromRightClick=no	Spnope & Ellison, 1963	0.01	0.28
135	Anona squamosa	Annona squamosa L.	Cultivated	Angiosperm	Annonaceae	Dicot	Bicellular	Wet	NA	Prasad	1963	0	https://apps.webofknowledge.com/full_record.do?product=UA&search_mode=GeneralSearch&qid=35&SID=D6l5HCkDXi5YhGZgnLg&page=1&doc=8&cacheurlFromRightClick=no	Prasad, 1963	0.01	0.2
136	Crambe abyssinica Hochst. ex R.E.Fr.	Crambe hispanica subsp. abyssinica (Hochst. ex R.E.Fr.) Prina	Cultivated	Angiosperm	Brassicaceae	Dicot	Tricellular	Dry	NA	Byelyayeva	1963	0	https://apps.webofknowledge.com/full_record.do?product=UA&search_mode=GeneralSearch&qid=35&SID=D6l5HCkDXi5YhGZgnLg&page=2&doc=11&cacheurlFromRightClick=no	Byelyayeva, 1963	0	0.2
137	Impatiens balsaminea L.	Impatiens balsamina L.	Wild	Angiosperm	Balsaminaceae	Dicot	Bicellular	Wet	Starchy	Mehrotra	1963	0	https://apps.webofknowledge.com/full_record.do?product=UA&search_mode=GeneralSearch&qid=35&SID=D6l5HCkDXi5YhGZgnLg&page=2&doc=12&cacheurlFromRightClick=no	Mehrotra & Vig, 1963	0	0.05
138	Polygonum weyrichii	Polygonum weyrichii F. Schmidt	Wild	Angiosperm	Polygonaceae	Dicot	Tricellular	Dry	Starchy	Kudrawtsava	1963	0	https://apps.webofknowledge.com/full_record.do?product=UA&search_mode=GeneralSearch&qid=35&SID=D6l5HCkDXi5YhGZgnLg&page=2&doc=13&cacheurlFromRightClick=no	Kudrawtsava, 1963	0	0.1	1.62
139	Polygonum divaricatum	Polygonum divaricatum L.	Wild	Angiosperm	Polygonaceae	Dicot	Tricellular	Dry	Starchy	Kudrawtsava	1963	0	https://apps.webofknowledge.com/full_record.do?product=UA&search_mode=GeneralSearch&qid=35&SID=D6l5HCkDXi5YhGZgnLg&page=2&doc=13&cacheurlFromRightClick=no	Kudrawtsava, 1963	0	0.1	1.62
140	Solanum acaule Bitt	Solanum acaule Bitter	Wild	Angiosperm	Solanaceae	Dicot	Bicellular	Wet	Starchy and starchless	Mortenson	1964	1	https://link.springer.com/content/pdf/10.1007/BF02855667.pdf	Mortenson et al., 1964	0	0.2	0.81
141	Solanum acroscopicum Ochoa	Solanum acroscopicum Ochoa	Wild	Angiosperm	Solanaceae	Dicot	Bicellular	Wet	Starchy and starchless	Mortenson	1964	1	https://link.springer.com/content/pdf/10.1007/BF02855667.pdf	Mortenson et al., 1964	0	0.2	0.81
142	Solanum berthaultii Hawkes	Solanum berthaultii Hawkes	Wild	Angiosperm	Solanaceae	Dicot	Bicellular	Wet	Starchy and starchless	Mortenson	1964	1	https://link.springer.com/content/pdf/10.1007/BF02855667.pdf	Mortenson et al., 1964	0	0.2	0.81
143	Solanum butbocastanum Dun	Solanum bulbocastanum Dunal	Wild	Angiosperm	Solanaceae	Dicot	Bicellular	Wet	Starchy and starchless	Mortenson	1964	1	https://link.springer.com/content/pdf/10.1007/BF02855667.pdf	Mortenson et al., 1964	0	0.2	0.81
144	Solanum brachycarpum Corr	Solanum brachycarpum Correll	Wild	Angiosperm	Solanaceae	Dicot	Bicellular	Wet	Starchy and starchless	Mortenson	1964	1	https://link.springer.com/content/pdf/10.1007/BF02855667.pdf	Mortenson et al., 1964	0	0.2	0.81
145	Solanum brevicaule Bitt	Solanum brevicaule Bitter	Wild	Angiosperm	Solanaceae	Dicot	Bicellular	Wet	Starchy and starchless	Mortenson	1964	1	https://link.springer.com/content/pdf/10.1007/BF02855667.pdf	Mortenson et al., 1964	0	0.2	0.81
146	Solanum boliviense Dun	Solanum boliviense Dunal	Wild	Angiosperm	Solanaceae	Dicot	Bicellular	Wet	Starchy and starchless	Mortenson	1964	1	https://link.springer.com/content/pdf/10.1007/BF02855667.pdf	Mortenson et al., 1964	0	0.2	0.81
147	Solanum canasense Hawkes	Solanum bukasovii Juz.	Wild	Angiosperm	Solanaceae	Dicot	Bicellular	Wet	Starchy and starchless	Mortenson	1964	1	https://link.springer.com/content/pdf/10.1007/BF02855667.pdf	Mortenson et al., 1964	0	0.2	0.81
148	Solanum candoleanum Berth	Solanum candolleanum Berthault	Wild	Angiosperm	Solanaceae	Dicot	Bicellular	Wet	Starchy and starchless	Mortenson	1964	1	https://link.springer.com/content/pdf/10.1007/BF02855667.pdf	Mortenson et al., 1964	0	0.2	0.81
149	Solanum cardiophyllum Lindl	Solanum cardiophyllum Lindl.	Wild	Angiosperm	Solanaceae	Dicot	Bicellular	Wet	Starchy and starchless	Mortenson	1964	1	https://link.springer.com/content/pdf/10.1007/BF02855667.pdf	Mortenson et al., 1964	0	0.2	0.81
150	Solanum chacoense Bitt	Solanum chacoense Bitter	Wild	Angiosperm	Solanaceae	Dicot	Bicellular	Wet	Starchy and starchless	Mortenson	1964	1	https://link.springer.com/content/pdf/10.1007/BF02855667.pdf	Mortenson et al., 1964	0	0.2	0.81
151	Solanum chomatophilum Bitt	Solanum chomatophilum Bitter	Wild	Angiosperm	Solanaceae	Dicot	Bicellular	Wet	Starchy and starchless	Mortenson	1964	1	https://link.springer.com/content/pdf/10.1007/BF02855667.pdf	Mortenson et al., 1964	0	0.2	0.81
152	Solanum clarum Corr	Solanum clarum Correll	Wild	Angiosperm	Solanaceae	Dicot	Bicellular	Wet	Starchy and starchless	Mortenson	1964	1	https://link.springer.com/content/pdf/10.1007/BF02855667.pdf	Mortenson et al., 1964	0	0.2	0.81
153	Solanum commersonii Dun	Solanum commersonii Dunal	Wild	Angiosperm	Solanaceae	Dicot	Bicellular	Wet	Starchy and starchless	Mortenson	1964	1	https://link.springer.com/content/pdf/10.1007/BF02855667.pdf	Mortenson et al., 1964	0	0.2	0.81
154	Solanum curtilobum Juz. et Buk	Solanum curtilobum Juz. & Bukasov	Wild	Angiosperm	Solanaceae	Dicot	Bicellular	Wet	Starchy and starchless	Mortenson	1964	1	https://link.springer.com/content/pdf/10.1007/BF02855667.pdf	Mortenson et al., 1964	0	0.2	0.81
155	Solanum demissum Lindl	Solanum demissum Lindl.	Wild	Angiosperm	Solanaceae	Dicot	Bicellular	Wet	Starchy and starchless	Mortenson	1964	1	https://link.springer.com/content/pdf/10.1007/BF02855667.pdf	Mortenson et al., 1964	0	0.2	0.81
156	Solanum ehrenbergii (Bitt.) Rydb	Solanum ehrenbergii Rydb.	Wild	Angiosperm	Solanaceae	Dicot	Bicellular	Wet	Starchy and starchless	Mortenson	1964	1	https://link.springer.com/content/pdf/10.1007/BF02855667.pdf	Mortenson et al., 1964	0	0.2	0.81
157	Solanum jendleri A. Gray	Solanum fendleri A. Gray	Wild	Angiosperm	Solanaceae	Dicot	Bicellular	Wet	Starchy and starchless	Mortenson	1964	1	https://link.springer.com/content/pdf/10.1007/BF02855667.pdf	Mortenson et al., 1964	0	0.2	0.81
158	Solanum famatinae Bitter & Wittm.	Solanum spegazzinii Bitter	Wild	Angiosperm	Solanaceae	Dicot	Bicellular	Wet	Starchy and starchless	Mortenson	1964	1	https://link.springer.com/content/pdf/10.1007/BF02855667.pdf	Mortenson et al., 1964	0	0.2	0.81
159	Solanum goniocalyx Juz. et Buk	Solanum goniocalyx Juz. & Bukasov	Wild	Angiosperm	Solanaceae	Dicot	Bicellular	Wet	Starchy and starchless	Mortenson	1964	1	https://link.springer.com/content/pdf/10.1007/BF02855667.pdf	Mortenson et al., 1964	0	0.2	0.81
160	Solanum infundibuliforme Phil	Solanum infundibuliforme Phil.	Wild	Angiosperm	Solanaceae	Dicot	Bicellular	Wet	Starchy and starchless	Mortenson	1964	1	https://link.springer.com/content/pdf/10.1007/BF02855667.pdf	Mortenson et al., 1964	0	0.2	0.81
161	Solanum jamesii Torr	Solanum jamesii Torr.	Wild	Angiosperm	Solanaceae	Dicot	Bicellular	Wet	Starchy and starchless	Mortenson	1964	1	https://link.springer.com/content/pdf/10.1007/BF02855667.pdf	Mortenson et al., 1964	0	0.2	0.81
162	Solanum kurtzianum Bitt. et Wittm	Solanum kurtzianum Bitter & Wittm.	Wild	Angiosperm	Solanaceae	Dicot	Bicellular	Wet	Starchy and starchless	Mortenson	1964	1	https://link.springer.com/content/pdf/10.1007/BF02855667.pdf	Mortenson et al., 1964	0	0.2	0.81
163	Solanum leptophyes Bitt	Solanum leptophyes Bitter	Wild	Angiosperm	Solanaceae	Dicot	Bicellular	Wet	Starchy and starchless	Mortenson	1964	1	https://link.springer.com/content/pdf/10.1007/BF02855667.pdf	Mortenson et al., 1964	0	0.2	0.81
164	Solanum leptostigma Juz. & Buk.	Solanum tuberosum L.	Cultivated	Angiosperm	Solanaceae	Dicot	Bicellular	Wet	Starchy and starchless	Mortenson	1964	1	https://link.springer.com/content/pdf/10.1007/BF02855667.pdf	Mortenson et al., 1964	0	0.2	0.81
165	Solanum lirriunianum Card. et Hawkes	Solanum brevicaule Bitter	Wild	Angiosperm	Solanaceae	Dicot	Bicellular	Wet	Starchy and starchless	Mortenson	1964	1	https://link.springer.com/content/pdf/10.1007/BF02855667.pdf	Mortenson et al., 1964	0	0.2	0.81
166	Solanum maglia Schlechtd	Solanum maglia Schltdl.	Wild	Angiosperm	Solanaceae	Dicot	Bicellular	Wet	Starchy and starchless	Mortenson	1964	1	https://link.springer.com/content/pdf/10.1007/BF02855667.pdf	Mortenson et al., 1964	0	0.2	0.81
167	Solanum megistaerolobum Bitt	Solanum megistacrolobum Bitter	Wild	Angiosperm	Solanaceae	Dicot	Bicellular	Wet	Starchy and starchless	Mortenson	1964	1	https://link.springer.com/content/pdf/10.1007/BF02855667.pdf	Mortenson et al., 1964	0	0.2	0.81
168	Solanum morelliforme Bitt, et Muench	Solanum morelliforme Bitter & Münch	Wild	Angiosperm	Solanaceae	Dicot	Bicellular	Wet	Starchy and starchless	Mortenson	1964	1	https://link.springer.com/content/pdf/10.1007/BF02855667.pdf	Mortenson et al., 1964	0	0.2	0.81
169	Solanum multidissectum Hawkes	Solanum bukasovii var. multidissectum (Hawkes) Ochoa	Wild	Angiosperm	Solanaceae	Dicot	Bicellular	Wet	Starchy and starchless	Mortenson	1964	1	https://link.springer.com/content/pdf/10.1007/BF02855667.pdf	Mortenson et al., 1964	0	0.2	0.81
170	Solanum neohawkesii Ochoa	Solanum bukasovii Juz.	Wild	Angiosperm	Solanaceae	Dicot	Bicellular	Wet	Starchy and starchless	Mortenson	1964	1	https://link.springer.com/content/pdf/10.1007/BF02855667.pdf	Mortenson et al., 1964	0	0.2	0.81
171	Solanum papita Rydb.	Solanum papita Rydb.	Wild	Angiosperm	Solanaceae	Dicot	Bicellular	Wet	Starchy and starchless	Mortenson	1964	1	https://link.springer.com/content/pdf/10.1007/BF02855667.pdf	Mortenson et al., 1964	0	0.2	0.81
172	Solanum phureja Juz. et Buk	Solanum phureja Juz. & Bukasov	Wild	Angiosperm	Solanaceae	Dicot	Bicellular	Wet	Starchy and starchless	Mortenson	1964	1	https://link.springer.com/content/pdf/10.1007/BF02855667.pdf	Mortenson et al., 1964	0	0.2	0.81
173	Solanum pinnatisectum Dun	Solanum pinnatisectum Dunal	Wild	Angiosperm	Solanaceae	Dicot	Bicellular	Wet	Starchy and starchless	Mortenson	1964	1	https://link.springer.com/content/pdf/10.1007/BF02855667.pdf	Mortenson et al., 1964	0	0.2	0.81
174	Solanum polyadenium Greenm	Solanum polyadenium Greenm.	Wild	Angiosperm	Solanaceae	Dicot	Bicellular	Wet	Starchy and starchless	Mortenson	1964	1	https://link.springer.com/content/pdf/10.1007/BF02855667.pdf	Mortenson et al., 1964	0	0.2	0.81
175	Solanum polytrichon Rydb.	Solanum polytrichon Rydb.	Wild	Angiosperm	Solanaceae	Dicot	Bicellular	Wet	Starchy and starchless	Mortenson	1964	1	https://link.springer.com/content/pdf/10.1007/BF02855667.pdf	Mortenson et al., 1964	0	0.2	0.81
176	Solanum raphanifolium Card. et Hawkes	Solanum raphanifolium Cárdenas & Hawkes	Wild	Angiosperm	Solanaceae	Dicot	Bicellular	Wet	Starchy and starchless	Mortenson	1964	1	https://link.springer.com/content/pdf/10.1007/BF02855667.pdf	Mortenson et al., 1964	0	0.2	0.81
177	Solanum sambucinum Rydb	Solanum sambucinum Rydb.	Wild	Angiosperm	Solanaceae	Dicot	Bicellular	Wet	Starchy and starchless	Mortenson	1964	1	https://link.springer.com/content/pdf/10.1007/BF02855667.pdf	Mortenson et al., 1964	0	0.2	0.81
178	Solanum sanctae-rosae Hawkes	Solanum sanctae-rosae Hawkes	Wild	Angiosperm	Solanaceae	Dicot	Bicellular	Wet	Starchy and starchless	Mortenson	1964	1	https://link.springer.com/content/pdf/10.1007/BF02855667.pdf	Mortenson et al., 1964	0	0.2	0.81
179	Solanum semidemissum Juz.	Solanum semidemissum Juz.	Wild	Angiosperm	Solanaceae	Dicot	Bicellular	Wet	Starchy and starchless	Mortenson	1964	1	https://link.springer.com/content/pdf/10.1007/BF02855667.pdf	Mortenson et al., 1964	0	0.2	0.81
180	Solanum simplicifolium Bitt	Solanum simplicifolium Bitter	Wild	Angiosperm	Solanaceae	Dicot	Bicellular	Wet	Starchy and starchless	Mortenson	1964	1	https://link.springer.com/content/pdf/10.1007/BF02855667.pdf	Mortenson et al., 1964	0	0.2	0.81
181	Solanum sogarandinum Ochoa	Solanum sogarandinum Ochoa	Wild	Angiosperm	Solanaceae	Dicot	Bicellular	Wet	Starchy and starchless	Mortenson	1964	1	https://link.springer.com/content/pdf/10.1007/BF02855667.pdf	Mortenson et al., 1964	0	0.2	0.81
182	Solanum sparsipilum (Bitt.) Juz. et Buk	Solanum sparsipilum (Bitter) Juz. & Bukasov	Wild	Angiosperm	Solanaceae	Dicot	Bicellular	Wet	Starchy and starchless	Mortenson	1964	1	https://link.springer.com/content/pdf/10.1007/BF02855667.pdf	Mortenson et al., 1964	0	0.2	0.81
183	Solanum stenophyllidium Bitt	Solanum stenophyllidium Bitter	Wild	Angiosperm	Solanaceae	Dicot	Bicellular	Wet	Starchy and starchless	Mortenson	1964	1	https://link.springer.com/content/pdf/10.1007/BF02855667.pdf	Mortenson et al., 1964	0	0.2	0.81
184	Solanum stenotomum Juz. et Buk	Solanum stenotomum Juz. & Bukasov	Wild	Angiosperm	Solanaceae	Dicot	Bicellular	Wet	Starchy and starchless	Mortenson	1964	1	https://link.springer.com/content/pdf/10.1007/BF02855667.pdf	Mortenson et al., 1964	0	0.2	0.81
185	Solanum sucrense Hawkes	Solanum sucrense Hawkes	Wild	Angiosperm	Solanaceae	Dicot	Bicellular	Wet	Starchy and starchless	Mortenson	1964	1	https://link.springer.com/content/pdf/10.1007/BF02855667.pdf	Mortenson et al., 1964	0	0.2	0.81
186	Solanum tarijense Hawkes	Solanum tarijense Hawkes	Wild	Angiosperm	Solanaceae	Dicot	Bicellular	Wet	Starchy and starchless	Mortenson	1964	1	https://link.springer.com/content/pdf/10.1007/BF02855667.pdf	Mortenson et al., 1964	0	0.2	0.81
187	Solanum trifidum Corr	Solanum trifidum Correll	Wild	Angiosperm	Solanaceae	Dicot	Bicellular	Wet	Starchy and starchless	Mortenson	1964	1	https://link.springer.com/content/pdf/10.1007/BF02855667.pdf	Mortenson et al., 1964	0	0.2	0.81
188	Solanum vernei Bitt. et Wittm	Solanum vernei Bitter & Wittm.	Cultivated	Angiosperm	Solanaceae	Dicot	Bicellular	Wet	Starchy and starchless	Mortenson	1964	1	https://link.springer.com/content/pdf/10.1007/BF02855667.pdf	Mortenson et al., 1964	0	0.2	0.81
189	Solanum verrucosum Schlechtd	Solanum verrucosum Schltdl.	Cultivated	Angiosperm	Solanaceae	Dicot	Bicellular	Wet	Starchy and starchless	Mortenson	1964	1	https://link.springer.com/content/pdf/10.1007/BF02855667.pdf	Mortenson et al., 1964	0	0.2	0.81
190	Capsicum annuum	Capsicum annuum L.	Cultivated	Angiosperm	Solanaceae	Dicot	Bicellular	Wet	Starchy and starchless	Vasil	1964	1	https://www.jstor.org/stable/pdf/2483429.pdf?refreqid=excelsior%3A9dc26bb4a740a8a727a8423e7c8141cb	Vasil, 1964	0	0.05
191	Solanum melongena	Solanum melongena L.	Cultivated	Angiosperm	Solanaceae	Dicot	Bicellular	Wet	Starchy and starchless	Vasil	1964	1	https://www.jstor.org/stable/pdf/2483429.pdf?refreqid=excelsior%3A9dc26bb4a740a8a727a8423e7c8141cb	Vasil, 1964	0	0.025	3.24
192	Solanum tuberosum L.	Solanum tuberosum L.	Cultivated	Angiosperm	Solanaceae	Dicot	Bicellular	Wet	Starchy and starchless	Vasil	1964	1	https://www.jstor.org/stable/pdf/2483429.pdf?refreqid=excelsior%3A9dc26bb4a740a8a727a8423e7c8141cb	Vasil, 1964	0	0.05	1.62
193	Pisum sativum	Pisum sativum L.	Cultivated	Angiosperm	Fabaceae	Dicot	Bicellular	Wet	NA	Layne	1964	0	https://apps.webofknowledge.com/full_record.do?product=UA&search_mode=GeneralSearch&qid=45&SID=D6l5HCkDXi5YhGZgnLg&page=1&doc=7&cacheurlFromRightClick=no	Layne & Hagedorn, 1964	0	0.2	0.17
194	Medicago sativa L.	Medicago sativa L.	Cultivated	Angiosperm	Fabaceae	Dicot	Bicellular	Wet	NA	Lehmann	1964	0	https://apps.webofknowledge.com/full_record.do?product=UA&search_mode=GeneralSearch&qid=45&SID=D6l5HCkDXi5YhGZgnLg&page=1&doc=8&cacheurlFromRightClick=no	Lehman & Puri, 1964	0.015	0.2
195	Hevea brasiliensis	Hevea brasiliensis (Willd. ex A.Juss.) Müll.Arg.	Wild	Angiosperm	Euphorbiaceae	Dicot	Tricellular	Dry	Starchy	Majumder	1964	0	https://apps.webofknowledge.com/full_record.do?product=UA&search_mode=GeneralSearch&qid=45&SID=D6l5HCkDXi5YhGZgnLg&page=1&doc=14&cacheurlFromRightClick=no	Majumder, 1964	0	0.15	1.62
196	Nicotiana tabacum L.	Nicotiana tabacum L.	Cultivated	Angiosperm	Solanaceae	Dicot	Bicellular	Wet	Starchy and starchless	Dean	1964	0	https://apps.webofknowledge.com/full_record.do?product=UA&search_mode=GeneralSearch&qid=45&SID=D6l5HCkDXi5YhGZgnLg&page=1&doc=19&cacheurlFromRightClick=no	Dean, 1964	0	0.15	0.49
197	Primula sp	Primula sp.	Wild	Angiosperm	Primulaceae	Dicot	Bicellular	Dry	Starchless	Lensu	1964	0	https://apps.webofknowledge.com/full_record.do?product=UA&search_mode=GeneralSearch&qid=45&SID=D6l5HCkDXi5YhGZgnLg&page=1&doc=20&cacheurlFromRightClick=no	Lensu, 1964	0.01	0.15
198	Citrus semperflorens Lush.	Citrus semperflorens Lush.	Cultivated	Angiosperm	Rutaceae	Dicot	Bicellular	Wet	Starchy and starchless	Motial	1964	1	https://www.ias.ac.in/article/fulltext/secb/060/01/0026-0037	Motial, 1964	0	0.05
199	Citrus pennivesiculata Tanaka	Citrus pennivesiculata (Lush.) Yu.Tanaka	Cultivated	Angiosperm	Rutaceae	Dicot	Bicellular	Wet	Starchy and starchless	Motial	1964	1	https://www.ias.ac.in/article/fulltext/secb/060/01/0026-0037	Motial, 1964	0	0.25
200	Citurs limon Burro	Citrus limon (L.) Osbeck	Cultivated	Angiosperm	Rutaceae	Dicot	Bicellular	Wet	Starchy and starchless	Motial	1964	1	https://www.ias.ac.in/article/fulltext/secb/060/01/0026-0037	Motial, 1964	0	0.1
201	Citrus jambhiri Lush.	Citrus jambhiri Lush.	Cultivated	Angiosperm	Rutaceae	Dicot	Bicellular	Wet	Starchy and starchless	Motial	1964	1	https://www.ias.ac.in/article/fulltext/secb/060/01/0026-0037	Motial, 1964	0	0.1
202	Citrus limonia	Citrus limon (L.) Osbeck	Cultivated	Angiosperm	Rutaceae	Dicot	Bicellular	Wet	Starchy and starchless	Motial	1964	1	https://www.ias.ac.in/article/fulltext/secb/060/01/0026-0037	Motial, 1964	0	0.05
203	Citrus aurantium Linn.	Citrus aurantium L.	Cultivated	Angiosperm	Rutaceae	Dicot	Bicellular	Wet	Starchy and starchless	Motial	1964	1	https://www.ias.ac.in/article/fulltext/secb/060/01/0026-0037	Motial, 1964	0	0.25
204	Citrus karna Raft	Citrus × karna Raf.	Cultivated	Angiosperm	Rutaceae	Dicot	Bicellular	Wet	Starchy and starchless	Motial	1964	1	https://www.ias.ac.in/article/fulltext/secb/060/01/0026-0037	Motial, 1964	0	0
205	Citrus limettioides Tanaka	Citrus × limettioides Yu.Tanaka	Cultivated	Angiosperm	Rutaceae	Dicot	Bicellular	Wet	Starchy and starchless	Motial	1964	1	https://www.ias.ac.in/article/fulltext/secb/060/01/0026-0037	Motial, 1964	0	0.25
206	Citrus galgal Motial and Singh	Citrus galgal Motial and Singh	Cultivated	Angiosperm	Rutaceae	Dicot	Bicellular	Wet	Starchy and starchless	Motial	1964	1	https://www.ias.ac.in/article/fulltext/secb/060/01/0026-0037	Motial, 1964	0	0.15
207	Citrus aurantifolia Swingle	Citrus ×aurantiifolia (Christm.) Swingle (pro sp.)	Cultivated	Angiosperm	Rutaceae	Dicot	Bicellular	Wet	Starchy and starchless	Motial	1964	1	https://www.ias.ac.in/article/fulltext/secb/060/01/0026-0037	Motial, 1964	0
208	Hibiscus rosa-sinensis	Hibiscus rosa-sinensis L.	Cultivated	Angiosperm	Malvaceae	Dicot	Bicellular	Dry	Starchy	Kochis	1966	0	https://apps.webofknowledge.com/full_record.do?product=UA&search_mode=GeneralSearch&qid=67&SID=D6l5HCkDXi5YhGZgnLg&page=1&doc=1&cacheurlFromRightClick=no	Cochis, 1966	0.01	0.4
209	Tradescantia paludosa E.S.Anderson & Woodson	Tradescantia ohiensis Raf.	Wild	Angiosperm	Commelinaceae	Monocot	Bicellular	Dry	Starchless	Mascarenchas	1966	0	https://bsapubs.onlinelibrary.wiley.com/doi/abs/10.1002/j.1537-2197.1966.tb07372.x	Mascarenhas, 1966	0.5% (gelatine)	0.1	1.62								10							0.05
210	Ulmus carpinifolia Gled.	Ulmus minor Mill.	Wild	Angiosperm	Ulmaceae	Dicot	Tricellular	Dry	NA	Greguss	1966	0	https://apps.webofknowledge.com/full_record.do?product=UA&search_mode=GeneralSearch&qid=67&SID=D6l5HCkDXi5YhGZgnLg&page=1&doc=5&cacheurlFromRightClick=no	Greguss, 1966	0.01	0.1
211	Ulmus montana With.	Ulmus glabra Huds.	Wild	Angiosperm	Ulmaceae	Dicot	Tricellular	Dry	NA	Greguss	1966	0	https://apps.webofknowledge.com/full_record.do?product=UA&search_mode=GeneralSearch&qid=67&SID=D6l5HCkDXi5YhGZgnLg&page=1&doc=5&cacheurlFromRightClick=no	Greguss, 1966	0.01	0.1
212	Ulmus effusa Willd.	Ulmus laevis Pall.	Wild	Angiosperm	Ulmaceae	Dicot	Tricellular	Dry	NA	Greguss	1966	0	https://apps.webofknowledge.com/full_record.do?product=UA&search_mode=GeneralSearch&qid=67&SID=D6l5HCkDXi5YhGZgnLg&page=1&doc=5&cacheurlFromRightClick=no	Greguss, 1966	0.01	0.1
213	Vaccinium corymbosum L.	Vaccinium corymbosum L.	Cultivated	Angiosperm	Ericaceae	Dicot	Bicellular	Wet	Starchless	Eaton	1966	1	https://www.nrcresearchpress.com/doi/pdf/10.4141/cjps66-032	Eaton, 1966	0	0.12
214	Vaccinium angustifolium	Vaccinium angustifolium Aiton	Cultivated	Angiosperm	Ericaceae	Dicot	Bicellular	Wet	Starchless	Eaton	1966	1	https://www.nrcresearchpress.com/doi/pdf/10.4141/cjps66-032	Eaton, 1966	0.005	0.135
215	Vaccinium corymbosum	Vaccinium corymbosum L.	Cultivated	Angiosperm	Ericaceae	Dicot	Bicellular	Wet	Starchless	Eaton	1966	1	https://www.nrcresearchpress.com/doi/pdf/10.4141/cjps66-032	Eaton, 1966	0	0.15	0.59											0.17
216	Setaria sphacelata	Setaria sphacelata (Schumach.) Stapf & C.E.Hubb. ex Moss	Wild	Angiosperm	Poaceae	Monocot	Tricellular	Dry	NA	Bruyn	1966	1	https://onlinelibrary.wiley.com/doi/abs/10.1111/j.1399-3054.1966.tb07027.x	Bruyn, 1966	0	0.222	0.05											0.01	0.01							0.01
217	Cucumis melo	Cucumis melo L.	Cultivated	Angiosperm	Cucurbitaceae	Dicot	Bicellular	Dry	Starchy and starchless	Holubinsky	1966	0	https://apps.webofknowledge.com/full_record.do?product=UA&search_mode=GeneralSearch&qid=67&SID=D6l5HCkDXi5YhGZgnLg&page=1&doc=7&cacheurlFromRightClick=no	Holubinsky, 1996	0	0.15	0.49
218	Cucumis sativus	Cucumis sativus L.	Cultivated	Angiosperm	Cucurbitaceae	Dicot	Bicellular	Dry	Starchy and starchless	Holubinsky	1966	0	https://apps.webofknowledge.com/full_record.do?product=UA&search_mode=GeneralSearch&qid=67&SID=D6l5HCkDXi5YhGZgnLg&page=1&doc=7&cacheurlFromRightClick=no	Holubinsky, 1996	0	0.15	0.49
219	Trifolium sp.	Trifolium sp.	Wild	Angiosperm	Fabaceae	Dicot	Bicellular	Wet	NA	Holubinsky	1966	0	https://apps.webofknowledge.com/full_record.do?product=UA&search_mode=GeneralSearch&qid=67&SID=D6l5HCkDXi5YhGZgnLg&page=1&doc=7&cacheurlFromRightClick=no	Holubinsky, 1996	0	0.15	0.49
220	Atropa belladonna	Atropa belladonna L.	Wild	Angiosperm	Solanaceae	Dicot	Bicellular	Wet	Starchy and starchless	Holubinsky	1966	0	https://apps.webofknowledge.com/full_record.do?product=UA&search_mode=GeneralSearch&qid=67&SID=D6l5HCkDXi5YhGZgnLg&page=1&doc=7&cacheurlFromRightClick=no	Holubinsky, 1996	0	0.15	0.49
221	Lycopersicon esculentum	Lycopersicon esculentum Mill.	Cultivated	Angiosperm	Solanaceae	Dicot	Bicellular	Wet	Starchy and starchless	Holubinsky	1966	0	https://apps.webofknowledge.com/full_record.do?product=UA&search_mode=GeneralSearch&qid=67&SID=D6l5HCkDXi5YhGZgnLg&page=1&doc=7&cacheurlFromRightClick=no	Holubinsky, 1996	0	0.15	0.49
222	Hypericum perforatum	Hypericum perforatum L.	Wild	Angiosperm	Hypericaceae	Dicot	Bicellular	Dry	Starchy and starchless	Holubinsky	1966	0	https://apps.webofknowledge.com/full_record.do?product=UA&search_mode=GeneralSearch&qid=67&SID=D6l5HCkDXi5YhGZgnLg&page=1&doc=7&cacheurlFromRightClick=no	Holubinsky, 1996	0	0.15	0.49
223	Petunia sp.	Petunia sp.	Cultivated	Angiosperm	Solanaceae	Dicot	Bicellular	Wet	Starchy and starchless	Holubinsky	1966	0	https://apps.webofknowledge.com/full_record.do?product=UA&search_mode=GeneralSearch&qid=67&SID=D6l5HCkDXi5YhGZgnLg&page=1&doc=7&cacheurlFromRightClick=no	Holubinsky, 1996	0	0.15	0.49
224	Pisum sativum	Pisum sativum L.	Cultivated	Angiosperm	Fabaceae	Dicot	Bicellular	Wet	NA	Holubinsky	1966	0	https://apps.webofknowledge.com/full_record.do?product=UA&search_mode=GeneralSearch&qid=67&SID=D6l5HCkDXi5YhGZgnLg&page=1&doc=7&cacheurlFromRightClick=no	Holubinsky, 1996	0	0.15	0.49
225	Lathyrus odoratus	Lathyrus odoratus L.	Cultivated	Angiosperm	Fabaceae	Dicot	Bicellular	Wet	NA	Holubinsky	1966	0	https://apps.webofknowledge.com/full_record.do?product=UA&search_mode=GeneralSearch&qid=67&SID=D6l5HCkDXi5YhGZgnLg&page=1&doc=7&cacheurlFromRightClick=no	Holubinsky, 1996	0	0.15	0.49
226	Oenothera biennis L.	Oenothera biennis L.	Wild	Angiosperm	Onagraceae	Dicot	Bicellular	Wet	Starchy	Holubinsky	1966	0	https://apps.webofknowledge.com/full_record.do?product=UA&search_mode=GeneralSearch&qid=67&SID=D6l5HCkDXi5YhGZgnLg&page=1&doc=7&cacheurlFromRightClick=no	Holubinsky, 1996	0	0.15	0.49
227	Antirrhinum majus	Antirrhinum majus L.	Wild	Angiosperm	Plantaginaceae	Dicot	Bicellular	Dry	Starchy	Holubinsky	1966	0	https://apps.webofknowledge.com/full_record.do?product=UA&search_mode=GeneralSearch&qid=67&SID=D6l5HCkDXi5YhGZgnLg&page=1&doc=7&cacheurlFromRightClick=no	Holubinsky, 1996	0	0.15	0.49
228	Lathyrus odoratus	Lathyrus odoratus L.	Cultivated	Angiosperm	Fabaceae	Dicot	Bicellular	Wet	NA	Holubinsky	1966	0	https://apps.webofknowledge.com/full_record.do?product=UA&search_mode=GeneralSearch&qid=67&SID=D6l5HCkDXi5YhGZgnLg&page=1&doc=7&cacheurlFromRightClick=no	Holubinsky, 1996	0	0.15	0.49
229	Zea mays	Zea mays L.	Cultivated	Angiosperm	Poaceae	Monocot	Tricellular	Dry	NA	Pfahler	1967	1	https://www.genetics.org/content/genetics/57/3/523.full.pdf	Pfahler, 1967	0.006	0.15	1.62			1.83
230	Lilium longiflorum	Lilium longiflorum Thunb.	Wild	Angiosperm	Liliaceae	Monocot	Bicellular	Wet	Starchless	Dickinson	1967	1	https://onlinelibrary.wiley.com/doi/pdf/10.1111/j.1399-3054.1967.tb07149.x?casa_token=ZsFhpsSlurUAAAAA:bQgl_5ddj73vJunF1UDAUUj99DcLo-78FVLR3jwPC_sWdXfrNzdytv-YKJy5kN_Z8QNICFICT0CsPILG	Dickinson, 1967	0	0.099	0.17			1.27										1
231	Crinum asiaticum	Crinum asiaticum L.	Cultivated	Angiosperm	Amaryllidaceae	Monocot	Bicellular	Dry	Starchless	Kwack	1967	1	https://onlinelibrary.wiley.com/doi/pdf/10.1111/j.1399-3054.1967.tb07143.x?casa_token=EGEUesgIF58AAAAA:xCObSrgA1Vf-xulynM7ksus_bUsKodepxkRJeyfSZRNDRk1W6cJHIrpVlwON4obx1MB9xw8_aolVyg0z	Kwack & Kim, 1967	0	0.1	1.62			1.28 (4H2O)						0.82 (7H2O)				0.99
232	Catharanthus roseu	Catharanthus roseus (L.) G.Don	Cultivated	Angiosperm	Apocynaceae	Dicot	Bicellular	Dry and wet	Starchless	Kwack	1967	1	https://onlinelibrary.wiley.com/doi/pdf/10.1111/j.1399-3054.1967.tb07143.x?casa_token=EGEUesgIF58AAAAA:xCObSrgA1Vf-xulynM7ksus_bUsKodepxkRJeyfSZRNDRk1W6cJHIrpVlwON4obx1MB9xw8_aolVyg0z	Kwack & Kim, 1967	0	0.1	1.62			1.28 (4H2O)						0.82 (7H2O)				0.99
233	Trifolium pratense L.	Trifolium pratense L.	Wild	Angiosperm	Fabaceae	Dicot	Bicellular	Wet	NA	Kendall	1967	1	https://apps.webofknowledge.com/full_record.do?product=UA&search_mode=GeneralSearch&qid=2&SID=C33pMauqspw669ZoVAO&page=1&doc=9&cacheurlFromRightClick=no	Kendal, 1967	0	0.35	0.81			8.46 (4H2O)																											yeast extract 0.02%
234	Pinus edulis	Pinus edulis Engelm.	Wild	Gymnosperm	Pinaceae				NA	Chira	1967	1	https://apps.webofknowledge.com/full_record.do?product=UA&search_mode=GeneralSearch&qid=2&SID=C33pMauqspw669ZoVAO&page=1&doc=4&cacheurlFromRightClick=no	Chira, 1967	0.01	0.02	1.62
235	Hibiscus rosa-sinesis L.	Hibiscus rosa-sinensis L.	Cultivated	Angiosperm	Malvaceae	Dicot	Bicellular	Dry	Starchy	Vilasini	1967	1	https://krishikosh.egranth.ac.in/displaybitstream?handle=1/5810061644	Vilasini et al., 1967	0.01	0.4	1.62
236	Petunia sp.	Petunia sp.	Cultivated	Angiosperm	Solanaceae	Dicot	Bicellular	Wet	Starchy and starchless	Shrauwen	1967	1	http://natuurtijdschriften.nl/download?type=document;docid=539465	Schrauwen & Linskens, 1967	0	0.1	1.62
237	Secale cereale	Secale cereale L.	Cultivated	Angiosperm	Poaceae	Monocot	Tricellular	Dry	NA	Mashtaler	1968	0	https://apps.webofknowledge.com/full_record.do?product=UA&search_mode=GeneralSearch&qid=26&SID=C33pMauqspw669ZoVAO&page=2&doc=16&cacheurlFromRightClick=no	Mashtaler, 1968	0.01	0.25
238	Avena byzantina C. Koch	Avena byzantina K.Koch	Wild	Angiosperm	Poaceae	Monocot	Tricellular	Dry	NA	Wallace	1968	0	https://apps.webofknowledge.com/full_record.do?product=UA&search_mode=GeneralSearch&qid=26&SID=C33pMauqspw669ZoVAO&page=1&doc=4&cacheurlFromRightClick=no	Wallace & Karbassi, 1968	0.03	13% + 1.7% rafinose	3.24			1.53
239	Chrysanthemum morifolium	Chrysanthemum morifolium Ramat.	Cultivated	Angiosperm	Asteraceae	Dicot	Tricellular	Dry	NA	Tsukamoto	1968	0	https://apps.webofknowledge.com/full_record.do?product=UA&search_mode=GeneralSearch&qid=26&SID=C33pMauqspw669ZoVAO&page=2&doc=13&cacheurlFromRightClick=no	Tsukamoto & Matsubara, 1968	0	0.25	0.17
240	Chrysanthemum leucanthemum L.	Leucanthemum vulgare (Vaill.) Lam.	Wild	Angiosperm	Asteraceae	Dicot	Tricellular	Dry	NA	Tsukamoto	1968	0	https://apps.webofknowledge.com/full_record.do?product=UA&search_mode=GeneralSearch&qid=26&SID=C33pMauqspw669ZoVAO&page=2&doc=13&cacheurlFromRightClick=no	Tsukamoto & Matsubara, 1968	0	0.25	0.17
241	Corylus americana	Corylus americana Walter	Wild	Angiosperm	Betulaceae	Dicot	Bicellular	Dry	Starchy and starchless	Zielinski	1968	1	https://link.springer.com/content/pdf/10.1007/BF00038973.pdf	Zielinski, 1968	0.015	0.2	0.17
242	Beta vulgaris	Beta vulgaris L.	Cultivated	Angiosperm	Amaranthaceae	Dicot	Tricellular	Dry	NA	Glenk	1969	0	https://www.ncbi.nlm.nih.gov/pubmed/24435481	Glenk et al., 1969	5% (gelatine)	0.3	4.86
243	Pinus mugo	Pinus mugo Turra	Wild	Gymnosperm	Pinaceae				NA	Nygaard	1969	1	https://onlinelibrary.wiley.com/doi/epdf/10.1111/j.1399-3054.1969.tb07384.x	Nygaard, 1969			1.62			1.28 (4H2O)						0.82 (7H2O)						2.21
244	Fragaria × ananassa	Fragaria x ananassa (Duchesne ex Weston) Duchesne ex Rozier	Cultivated	Angiosperm	Rosaceae	Dicot	Bicellular	Wet	Starchy and starchless	Chen	1969	1	https://pdfs.semanticscholar.org/d0a0/2ed50adb32e05cae474ff248d5199403e3ee.pdf	Chen, 1969	0.0075	0.1
245	Poa pratensis L.	Poa pratensis L.	Wild	Angiosperm	Poaceae	Monocot	Tricellular	Dry	NA	Maun	1969	0	https://acsess.onlinelibrary.wiley.com/doi/abs/10.2135/cropsci1969.0011183X000900030049x	Maun et al., 1969	0.0075	0.13	0.09			0.05 (4H2O)
246	Lycopersicon pimpinellifolium (L.) Mill.	Solanum pimpinellifolium L.	Wild	Angiosperm	Solanaceae	Dicot	Bicellular	Wet	Starchy and starchless	Gussin	1969	1	http://www.plantphysiol.org/content/plantphysiol/44/8/1163.full.pdf	Gussin et al., 1969	0	0.1	1.62			1.28 (4H2O)						0.82 (7H2O)						2.21
247	Hermerocallis minor	Hemerocallis minor Mill.	Wild	Angiosperm	Asphodelaceae	Monocot	Bicellular	Wet	NA	Gussin	1969	1	http://www.plantphysiol.org/content/plantphysiol/44/8/1163.full.pdf	Gussin et al., 1969	0	0.1	1.62			1.28 (4H2O)						0.82 (7H2O)						2.21
248	Galtonia candicans (Baker) Decne.	Ornithogalum candicans (Baker) J.C.Manning & Goldblatt	Wild	Angiosperm	Asparagaceae	Monocot	Bicellular	Dry	NA	Gussin	1969	1	http://www.plantphysiol.org/content/plantphysiol/44/8/1163.full.pdf	Gussin et al., 1969	0	0.1	1.62			1.28 (4H2O)						0.82 (7H2O)						2.21
249	Camellia japoxica	Camellia japonica L.	Cultivated	Angiosperm	Theaceae	Dicot	Bicellular	Wet	Starchless	Gussin	1969	1	http://www.plantphysiol.org/content/plantphysiol/44/8/1163.full.pdf	Gussin et al., 1969	0	0.1	1.62			1.28 (4H2O)						0.82 (7H2O)						2.21
250	Lathyrus odoratus	Lathyrus odoratus L.	Cultivated	Angiosperm	Fabaceae	Dicot	Bicellular	Wet	NA	Gussin	1969	1	http://www.plantphysiol.org/content/plantphysiol/44/8/1163.full.pdf	Gussin et al., 1969	0	0.1	1.62			1.28 (4H2O)						0.82 (7H2O)						2.21
251	Juglans nigra	Juglans nigra L.	Cultivated	Angiosperm	Juglandaceae	Dicot	Bicellular	Dry	Starchless	Hall	1971	0	https://www.nrcresearchpress.com/doi/abs/10.1139/b71-120#.Xpg3if1zTcc	Hall & Farmer Jr., 1971	0.008	0.2	1.62			1.83						1.66				0.99
252	Lycopersicon pimpinellifolium (L.) Mill.	Solanum pimpinellifolium L.	Wild	Angiosperm	Solanaceae	Dicot	Bicellular	Wet	Starchy and starchless	Gentel	1971	0	https://academic.oup.com/jee/article-abstract/64/4/916/2210186	Gentile et al., 1971	0.01	0.25	0.97								0.28
253	Lycopersicon peruvianum (L.) Mill.	Solanum peruvianum L.	Wild	Angiosperm	Solanaceae	Dicot	Bicellular	Wet	Starchy and starchless	Gentel	1971	0	https://academic.oup.com/jee/article-abstract/64/4/916/2210186	Gentile et al., 1971	0.01	0.25	0.97								0.28
254	Lycopersicon hirsutum	Lycopersicon hirsutum Dunal	Wild	Angiosperm	Solanaceae	Dicot	Bicellular	Wet	Starchy and starchless	Gentel	1971	0	https://academic.oup.com/jee/article-abstract/64/4/916/2210186	Gentile et al., 1971	0.01	0.25	0.97								0.28
255	Lycopersicon esculentum	Lycopersicon esculentum Mill.	Cultivated	Angiosperm	Solanaceae	Dicot	Bicellular	Wet	Starchy and starchless	Gentel	1971	0	https://academic.oup.com/jee/article-abstract/64/4/916/2210186	Gentile et al., 1971	0.01	0.25	0.97								0.28
256	Petunia hybrida	Petunia hybrida Vilm.	Cultivated	Angiosperm	Solanaceae	Dicot	Bicellular	Wet	Starchy and starchless	Gentel	1971	0	https://academic.oup.com/jee/article-abstract/64/4/916/2210186	Gentile et al., 1971	0.01	0.15	0.97
257	Cryptomeria japonica	Cryptomeria japonica (Thunb. ex L.f.) D.Don	Wild	Gymnosperm	Cupressaceae				NA	Fukuhara	1971	1	https://www.jstage.jst.go.jp/article/jjfs1953/53/4/53_4_98/_pdf/-char/ja	Fukuhara et al., 1971	0.015	0.125
258	Hinoki cypress	Chamaecyparis obtusa (Siebold & Zucc.) Endl.	Wild	Gymnosperm	Cupressaceae				NA	Fukuhara	1971	1	https://www.jstage.jst.go.jp/article/jjfs1953/53/4/53_4_98/_pdf/-char/ja	Fukuhara et al., 1971	0.015	0.125
259	Crinum asiaticum L.	Crinum asiaticum L.	Wild	Angiosperm	Amaryllidaceae	Monocot	Bicellular	Dry	Starchless	Martin	1972	1	http://www.plantphysiol.org/content/plantphysiol/49/6/924.full.pdf	Martin, 1972	0.015	0.125	1.62			1.83						0.84				0.99
260	Catharanthus roseus (L.) G. Don	Catharanthus roseus (L.) G.Don	Cultivated	Angiosperm	Apocynaceae	Dicot	Bicellular	Dry and wet	Starchless	Martin	1972	1	http://www.plantphysiol.org/content/plantphysiol/49/6/924.full.pdf	Martin, 1972	0.015	0.125	1.62			1.83						0.84				0.99
261	Kigelia pinnata (Jacq.) DC.	Kigelia africana (Lam.) Benth.	Wild	Angiosperm	Bignoniaceae	Dicot	Bicellular	Wet	Starchy and starchless	Martin	1972	1	http://www.plantphysiol.org/content/plantphysiol/49/6/924.full.pdf	Martin, 1972	0.015	0.125	1.62			1.83						0.84				0.99
262	Pseudotsuga menziesii	Pseudotsuga menziesii (Mirb.) Franco	Cultivated	Gymnosperm	Pinaceae				NA	Livingston	1973	0	https://www.sciencedirect.com/science/article/abs/pii/S0033756073800134	Livingston & Stettler, 1973	0.005	0.17	0.81
263	Lolium multiflorum	Lolium multiflorum Lam.	Wild	Angiosperm	Poaceae	Monocot	Tricellular	Dry	NA	Ahloowalia	1973	1	https://link.springer.com/content/pdf/10.1007/BF00036658.pdf	Ahloowalia, 1973	0	0.2	0.17								0.1
264	Lolium perenne	Lolium perenne L.	Wild	Angiosperm	Poaceae	Monocot	Tricellular	Dry	NA	Ahloowalia	1973	1	https://link.springer.com/content/pdf/10.1007/BF00036658.pdf	Ahloowalia, 1973	0	0.2	0.17								0.1
265	Trifolium hybridum L.	Trifolium hybridum L.	Wild	Angiosperm	Fabaceae	Dicot	Bicellular	Wet	NA	Benner	1973	0	https://acsess.onlinelibrary.wiley.com/doi/abs/10.2135/cropsci1973.0011183X001300050013x	Benner & Townsend, 1973	0	0.25	0.81					1
266	Cupressus benthamii Endl.	Cupressus lusitanica var. benthamii (Endl.) Carrière	Wild	Gymnosperm	Cupressaceae				NA	Razmologov	1973	1	https://www.jstor.org/stable/pdf/2484521.pdf	Razmologov, 1973	0
267	Cupressus macrocarpa Hartw	Cupressus macrocarpa Hartw.	Wild	Gymnosperm	Cupressaceae				NA	Razmologov	1973	1	https://www.jstor.org/stable/pdf/2484521.pdf	Razmologov, 1973	0
268	Cupressus sempervirens L.	Cupressus sempervirens L.	Wild	Gymnosperm	Cupressaceae				NA	Razmologov	1973	1	https://www.jstor.org/stable/pdf/2484521.pdf	Razmologov, 1973	0
269	Antirrhinum majus	Antirrhinum majus L.	Wild	Angiosperm	Plantaginaceae	Dicot	Bicellular	Dry	Starchy	Balatkova	1973	1	https://link.springer.com/content/pdf/10.1007/BF02922348.pdf	Balatkova & Tupy et al., 1973	0	0.103	0.17
270	Pinus sylvestris	Pinus sylvestris L.	Wild	Gymnosperm	Pinaceae				NA	Zelles	1973	1	https://link.springer.com/content/pdf/10.1007/BF01189851.pdf	Zelles & Ernst, 1973	0	0
271	Guar cyamopsis	Cyamopsis tetragonoloba (L.) Taub.	Cultivated	Angiosperm	Fabaceae	Dicot	Bicellular	Wet	NA	Tyagi	1974	0	https://apps.webofknowledge.com/full_record.do?product=UA&search_mode=GeneralSearch&qid=2&SID=E1w4bo6z7Z6ATNLitMo&page=2&doc=16&cacheurlFromRightClick=no	Tyagi, 1974	0	0.002	2.43
272	Trigonella foenum-graecum	Trigonella foenum-graecum L.	Cultivated	Angiosperm	Fabaceae	Dicot	Bicellular	Wet	NA	Shivanna	1974	1	https://reader.elsevier.com/reader/sd/pii/0304421174900054?token=F972DAC63A3927813C323287AA562335460F98DFC709AF08DCA55A7E662097E2A1FAD28ED9D765CFB7DA8C48521EEA47	Shivanna et al., 1974a	0	0.1	1.62								2.71	1.67				0.99
273	Arachis hypogaea	Arachis hypogaea L.	Cultivated	Angiosperm	Fabaceae	Dicot	Bicellular	Wet	NA	Faucette	1974	1	https://www.peanutscience.com/doi/pdf/10.3146/i0095-3679-1-1-5	Faucette & Emery, 1974	0.02	0.15	1.62			1.28 (4H2O)						0.82 (7H2O)						2.21
274	Abelmoschus esculentus	Abelmoschus esculentus (L.) Moench	Cultivated	Angiosperm	Malvaceae	Dicot	Bicellular	Dry	Starchy	Ganguli	1974	0	https://apps.webofknowledge.com/full_record.do?product=UA&search_mode=GeneralSearch&qid=2&SID=E1w4bo6z7Z6ATNLitMo&page=2&doc=12&cacheurlFromRightClick=no	Ganguly & Chanda, 1974	0	0.25
275	Ricinus communis	Ricinus communis L.	Cultivated	Angiosperm	Euphorbiaceae	Dicot	Bicellular	Dry	Starchy	Shivaram	1974	0	https://apps.webofknowledge.com/full_record.do?product=UA&search_mode=GeneralSearch&qid=2&SID=E1w4bo6z7Z6ATNLitMo&page=1&doc=10&cacheurlFromRightClick=no	Shivaram et al., 1974	0	0.17	0.81
276	Populus deltoides	Populus deltoides Marshall	Wild	Angiosperm	Salicaceae	Dicot	Bicellular	Dry	Starchless	Karnosky	1974	0	https://acsess.onlinelibrary.wiley.com/doi/epdf/10.2134/jeq1974.00472425000300040024x	Karnosky & Stairs, 1974	0.04	0.1
277	Pinus resinosa	Pinus resinosa Aiton	Wild	Gymnosperm	Pinaceae				NA	Karnosky	1974	0	https://acsess.onlinelibrary.wiley.com/doi/epdf/10.2134/jeq1974.00472425000300040024x	Karnosky & Stairs, 1974	0.01	0.05
278	Pinus nigra	Pinus nigra J.F.Arnold	Wild	Gymnosperm	Pinaceae				NA	Karnosky	1974	0	https://acsess.onlinelibrary.wiley.com/doi/epdf/10.2134/jeq1974.00472425000300040024x	Karnosky & Stairs, 1974	0.01	0.05
279	Picea pungens	Picea pungens Engelm.	Cultivated	Gymnosperm	Pinaceae				NA	Karnosky	1974	0	https://acsess.onlinelibrary.wiley.com/doi/epdf/10.2134/jeq1974.00472425000300040024x	Karnosky & Stairs, 1974	0.01	0.05
280	Torenia asiatica	Torenia asiatica L.	Wild	Angiosperm	Linderniaceae	Dicot	Bicellular	Dry	NA	Nambudiri	1974	1	https://www.jstor.org/stable/pdf/41711408.pdf?refreqid=excelsior%3A47f6d543e81d5ffc61c9ac632a12ebae	Nambudiri &Thomas, 1974	0	0.15
281	Brassica oleracea L. var. capitata L.	Brassica oleracea L.	Wild	Angiosperm	Brassicaceae	Dicot	Tricellular	Dry	NA	Chang	1974	1	https://link.springer.com/article/10.1007/BF00022479	Chiang, 1974	0.015	0.4	1.62								1.81
282	Impatients balsamina	Impatiens balsamina L.	Wild	Angiosperm	Balsaminaceae	Dicot	Bicellular	Wet	Starchy	Shivanna	1974	1	https://link.springer.com/article/10.1007/BF00390799	Shivanna et al., 1974b	0	0.1	1.62								2.71	1.67				0.99
283	Olea europaea L.	Olea europaea L.	Cultivated	Angiosperm	Oleaceae	Dicot	Bicellular	Dry	NA	Ateyyeh	2000	1	https://www.researchgate.net/profile/Ahmad_F_Ateyyeh/publication/272202718_Reproductive_biology_of_the_olive_Olea_europaea_L_cultivar_'Nabali_Baladi'/links/55660cee08aefcb861d195a2.pdf	Ateyyeh et al., 2000	0.008	0.1
284	Zea mays L.	Zea mays L.	Cultivated	Angiosperm	Poaceae	Monocot	Tricellular	Dry	NA	Geetha	2000	0	http://www.indianjournals.com/ijor.aspx?target=ijor:ijar2&volume=34&issue=3&article=019	Geetha & Jayaraman, 2000	?	1	1617.34
285	Sorghum bicolor (L.) Moench	Sorghum bicolor (L.) Moench	Wild	Angiosperm	Poaceae	Monocot	Tricellular	Dry	NA	Tuinstra	2000	1	https://acsess.onlinelibrary.wiley.com/doi/full/10.2135/cropsci2000.404968x	Tuinstra & Wedel, 2000	0.01	0.308	2.43			2.12
286	Trapa japonica Flerov	Trapa japonica Flerow	Wild	Angiosperm	Lythraceae	Dicot	Bicellular	Dry	Starchy and starchless	Hoque	2000	0	https://www.cabdirect.org/cabdirect/abstract/20013010947	Hoque & Arima, 2000	0.01	0.25	1.22								2.04 (2H2O)
287	Trapa bicornis Osbeck	Trapa natans L.	Cultivated	Angiosperm	Lythraceae	Dicot	Bicellular	Dry	Starchy and starchless	Hoque	2000	0	https://www.cabdirect.org/cabdirect/abstract/20013010948	Hoque & Arima, 2000	0.01	0.25	1.22								2.04 (2H2O)
288	Betula pendula Roth clones	Betula pendula Roth	Cultivated	Angiosperm	Betulaceae	Dicot	Bicellular	Dry	Starchy and starchless	Pasonen	2000	1	https://link.springer.com/article/10.1007%2Fs001220051393	Pasonen et al., 2000	0.01	0.171	1.62
289	Alopecurus myosuroides	Alopecurus myosuroides Huds.	Wild	Angiosperm	Poaceae	Monocot	Tricellular	Dry	NA	Letouze	2000	1	https://onlinelibrary.wiley.com/doi/10.1046/j.1365-3180.2000.00175.x	Letouzé & Gasquez, 2000	0.0025	0.2	1.62			1.22
290	Prunus dulcis (Mill.) D.A. Webb	Prunus dulcis (Mill.) D.A.Webb	Cultivated	Angiosperm	Rosaceae	Dicot	Bicellular	Wet	Starchy and starchless	Nyomora	2000	1	https://journals.ashs.org/jashs/view/journals/jashs/125/2/article-p265.xml	Nyomora et al., 2000	0.01	0.15	1.62
291	Larix occidentalis Nutt.	Larix occidentalis Nutt.	Wild	Gymnosperm	Pinaceae				NA	Dumont-BeBoux	2000	0	https://www.nrcresearchpress.com/doi/pdf/10.1139/x99-217	Dumont-BéBoux et al., 2000
292	Cornus florida L.	Cornus florida L.	Wild	Angiosperm	Cornaceae	Dicot	Bicellular	Dry	Starchy	Craddock	2000	1	https://journals.ashs.org/hortsci/view/journals/hortsci/35/1/article-p108.xml	Craddock et al., 2000	0.009	0.2
293	Nicotiana tabacum var. macrophylla	Nicotiana tabacum L.	Cultivated	Angiosperm	Solanaceae	Dicot	Bicellular	Wet	Starchy and starchless	Chen	2000	1	https://link.springer.com/content/pdf/10.1007/s004250000370.pdf	Chen et al., 2000	0	0.05	1.6								1	0.8				1			1				0.01				1								15 MES
294	Lycopersicon esculentum cv. first	Lycopersicon esculentum Mill.	Cultivated	Angiosperm	Solanaceae	Dicot	Bicellular	Wet	Starchy and starchless	Masuda	2000	1	https://www.jstage.jst.go.jp/article/jjshs1925/69/5/69_5_557/_pdf	Masuda et al., 2000	0	0.1	0.81								0.91
295	Nicotiana tabacum	Nicotiana tabacum L.	Cultivated	Angiosperm	Solanaceae	Dicot	Bicellular	Wet	Starchy and starchless	Sun	2000	0	https://europepmc.org/article/med/12549044	Sun et al., 2000
296	Ornithogalum virens Lindl.	Albuca virens (Lindl.) J.C.Manning & Goldblatt	Cultivated	Angiosperm	Asparagaceae	Monocot	Bicellular	Dry	NA	Stepka	2000	1	https://link.springer.com/content/pdf/10.1007/s004250050053.pdf	Stepka et al., 2000	0.015	0.1	1.62			1.83 (4H2O)						0.82 (7H2O)				0.99
297	Ornithogalum virens Lindl.	Albuca virens (Lindl.) J.C.Manning & Goldblatt	Cultivated	Angiosperm	Asparagaceae	Monocot	Bicellular	Dry	NA	Stepka	2000	1	https://link.springer.com/content/pdf/10.1007/s004250050053.pdf	Stepka et al., 2000	0	0.1	1.62			1.83 (4H2O)						0.82 (7H2O)				0.99
298	Petunia hybrida	Petunia hybrida Vilm.	Cultivated	Angiosperm	Solanaceae	Dicot	Bicellular	Wet	Starchy and starchless	Stepka	2000	1	https://link.springer.com/content/pdf/10.1007/s004250050053.pdf	Stepka et al., 2000	0	0.1	1.62			1.83 (4H2O)						0.82 (7H2O)				0.99
299	Picea abies	Picea abies (L.) H.Karst.	Wild	Gymnosperm	Pinaceae				NA	Anderhag	2000	1	https://link.springer.com/content/pdf/10.1007/BF01279059.pdf	Anderhag et al., 2000	0	0.171	1								1
300	Rosa hugonis Hemsl.	Rosa xanthina Lindl.	Wild	Angiosperm	Rosaceae	Dicot	Bicellular	Dry	Starchy and starchless	Koncalova	1975	1	http://www.preslia.cz/archive/Preslia_47_1975_22-25.pdf	Koncalova, 1975	0.015	0.35
301	Dianthus caryophyllus	Dianthus caryophyllus L.	Wild	Angiosperm	Caryophyllaceae	Dicot	Tricellular	Dry	Starchless	Safaryan	1975	0	http://apps.webofknowledge.com/full_record.do?product=UA&search_mode=GeneralSearch&qid=2&SID=C6aUgIEDhgxleYtkxuB&page=1&doc=22&cacheurlFromRightClick=no	Safaryan & Dallakian, 1975		30% (glucose)	1.62
302	Dianthus caryophyllus	Dianthus caryophyllus L.	Wild	Angiosperm	Caryophyllaceae	Dicot	Tricellular	Dry	Starchless	Safaryan	1975	0	http://apps.webofknowledge.com/full_record.do?product=UA&search_mode=GeneralSearch&qid=2&SID=C6aUgIEDhgxleYtkxuB&page=1&doc=22&cacheurlFromRightClick=no	Safaryan & Dallakian, 1975		0.5	1.62
303	Lycopersicon esculentum Mill.	Lycopersicon esculentum Mill.	Cultivated	Angiosperm	Solanaceae	Dicot	Bicellular	Wet	Starchy and starchless	Mcleod	1975	1	https://watermark.silverchair.com/39-3-591.pdf?token=AQECAHi208BE49Ooan9kkhW_Ercy7Dm3ZL_9Cf3qfKAc485ysgAAAoUwggKBBgkqhkiG9w0BBwagggJyMIICbgIBADCCAmcGCSqGSIb3DQEHATAeBglghkgBZQMEAS4wEQQMr5zUZpvCBmrDXURGAgEQgIICOHwalNWzmpXo99Ebt6AdGNzw8tVx-UzT0_CKunq2icaQ8JfYHBuHG-uwqYEO9rGInMsdlH3uHpf4qcfiIyjwB5tAzuxjrQqiJ86wKBcNjd-lrFw3Od-0pikP-DDNFlHpct6ZqUusoVK2lu1hyzfWtkLktJVJyDxCa-Y2KYgXNEFUdVoYRbLHcJ3E-Tts-p…	Mcleod, 1975	0.02	0.15	2.43
304	Arachis hypogaea Reitz	Arachis hypogaea L.	Cultivated	Angiosperm	Fabaceae	Dicot	Bicellular	Wet	NA	Malik	1976	1	https://link.springer.com/article/10.1007/BF03045587	Malik & Chhabra, 1976		0.1	1.62								2.71	1.67				0.99
305	Allium cepa	Allium cepa L.	Cultivated	Angiosperm	Amaryllidaceae	Monocot	Bicellular	Dry	Starchless	Ockendon	1976	1	https://nph.onlinelibrary.wiley.com/doi/epdf/10.1111/j.1469-8137.1976.tb01487.x	Ockendon & Gates, 1976	0	0.099	0.81			6.09
306	Allium cepa	Allium cepa L.	Cultivated	Angiosperm	Amaryllidaceae	Monocot	Bicellular	Dry	Starchless	Ockendon	1976	1	https://nph.onlinelibrary.wiley.com/doi/epdf/10.1111/j.1469-8137.1976.tb01487.x	Ockendon & Gates, 1976	0.006	0.075	0.81			6.09
307	Nicotiana alata	Nicotiana alata Link & Otto	Wild	Angiosperm	Solanaceae	Dicot	Bicellular	Wet	Starchy and starchless	Suss	1976	1	https://link.springer.com/content/pdf/10.1007/BF02923149.pdf	Süss & Tupý, 1976		0.103	0.17
308	Zea mays L.	Zea mays L.	Cultivated	Angiosperm	Poaceae	Monocot	Tricellular	Dry	NA	Sladky	1976	1	https://link.springer.com/content/pdf/10.1007/BF02922557.pdf	Sladký & Havel, 1976	0.01	0.17	0.17
309	Rosa arvensis	Rosa arvensis Huds.	Wild	Angiosperm	Rosaceae	Dicot	Bicellular	Dry	Starchy and starchless	Koncalova	1976	1	https://link.springer.com/content/pdf/10.1007/BF02922328.pdf	Končalová et al., 1976		0.15	1.62			1.28 (4H2O)						0.82 (7H2O)				0.99
310	Rosa canina	Rosa canina L.	Wild	Angiosperm	Rosaceae	Dicot	Bicellular	Dry	Starchy and starchless	Koncalova	1976	1	https://link.springer.com/content/pdf/10.1007/BF02922328.pdf	Končalová et al., 1976		0.15	1.62			1.28 (4H2O)						0.82 (7H2O)				0.99
311	Rosa eglanteria L.	Rosa rubiginosa L.	Wild	Angiosperm	Rosaceae	Dicot	Bicellular	Dry	Starchy and starchless	Koncalova	1976	1	https://link.springer.com/content/pdf/10.1007/BF02922328.pdf	Končalová et al., 1976		0.05	1.62			1.28 (4H2O)						0.82 (7H2O)				0.99
312	Rosa gallica	Rosa gallica L.	Wild	Angiosperm	Rosaceae	Dicot	Bicellular	Dry	Starchy and starchless	Koncalova	1976	1	https://link.springer.com/content/pdf/10.1007/BF02922328.pdf	Končalová et al., 1976		0.1	1.62			1.28 (4H2O)						0.82 (7H2O)				0.99
313	Rosa jundzillii Besser	Rosa marginata Wallr.	Wild	Angiosperm	Rosaceae	Dicot	Bicellular	Dry	Starchy and starchless	Koncalova	1976	1	https://link.springer.com/content/pdf/10.1007/BF02922328.pdf	Končalová et al., 1976		0.3	1.62			1.28 (4H2O)						0.82 (7H2O)				0.99
314	Rosa pendulina	Rosa pendulina L.	Wild	Angiosperm	Rosaceae	Dicot	Bicellular	Dry	Starchy and starchless	Koncalova	1976	1	https://link.springer.com/content/pdf/10.1007/BF02922328.pdf	Končalová et al., 1976		0.15	1.62			1.28 (4H2O)						0.82 (7H2O)				0.99
315	Lilium longiflorum	Lilium longiflorum Thunb.	Wild	Angiosperm	Liliaceae	Monocot	Bicellular	Wet	Starchless	Masaru	1976	1	https://www.sciencedirect.com/science/article/pii/0013932776900823?via%3Dihub	Masaru et al., 1976	0.01	0.1	1.62
316	Solanum tuberosum ssp. tuberosum	Solanum tuberosum L.	Cultivated	Angiosperm	Solanaceae	Dicot	Bicellular	Wet	Starchy and starchless	Janssen	1976	1	https://link.springer.com/content/pdf/10.1007/BF00041595.pdf	Janssen & Hermsen, 1976	0	0.02	0.09						0.07
317	Solanum tuberosum ssp. andigena	Solanum tuberosum subsp. andigena (Juz. & Bukasov) Hawkes	Cultivated	Angiosperm	Solanaceae	Dicot	Bicellular	Wet	Starchy and starchless	Janssen	1976	1	https://link.springer.com/content/pdf/10.1007/BF00041595.pdf	Janssen & Hermsen, 1976	0	0.02	0.09						0.07
318	Solanum phureja	Solanum phureja Juz. & Bukasov	Cultivated	Angiosperm	Solanaceae	Dicot	Bicellular	Wet	Starchy and starchless	Janssen	1976	1	https://link.springer.com/content/pdf/10.1007/BF00041595.pdf	Janssen & Hermsen, 1976	0	0.02	0.09						0.07
319	Solanum chacoense	Solanum chacoense Bitter	Cultivated	Angiosperm	Solanaceae	Dicot	Bicellular	Wet	Starchy and starchless	Janssen	1976	1	https://link.springer.com/content/pdf/10.1007/BF00041595.pdf	Janssen & Hermsen, 1976	0	0.02	0.09						0.07
320	Brassica oleracea var. capitata	Brassica oleracea L.	Wild	Angiosperm	Brassicaceae	Dicot	Tricellular	Dry	NA	Ferrari	1975	1	https://link.springer.com/content/pdf/10.1007/BF00132915.pdf	Ferrari & Wallace, 1975	0	0.205	0.1								0.4																								10 PO₄³⁻
321	Lilium longiflorum	Lilium longiflorum Thunb.	Wild	Angiosperm	Liliaceae	Monocot	Bicellular	Wet	Starchless	Chen	1977	1	http://www.plantphysiol.org/content/plantphysiol/59/4/653.full.pdf	Chen & Loewus, 1977			0.16			1.27										0.99													290
322	Hemerocallis fulva	Hemerocallis fulva (L.) L.	Cultivated	Angiosperm	Asphodelaceae	Monocot	Bicellular	Wet	NA	Portnoi	1977	1	https://watermark.silverchair.com/41-1-21.pdf?token=AQECAHi208BE49Ooan9kkhW_Ercy7Dm3ZL_9Cf3qfKAc485ysgAAAp0wggKZBgkqhkiG9w0BBwagggKKMIIChgIBADCCAn8GCSqGSIb3DQEHATAeBglghkgBZQMEAS4wEQQM-UltVnBGDnBvybtPAgEQgIICUBR7_zvYReMzhAnMEVk74KmHTgZ0gMskjHk1wbzYUozSSlAlVlvLZjtY3LuhyEmo6av99YJlwb48_FCopd7Cu6Fza2-HkIslbKXSSQmWEjt0vkq2zGH3sPzIAWLdyZc5U5NB-lyDIykUf07brRYgXrOf70NM98qLgchdL_rocauM0M4zRQFXDjIfbjuf0ht…	Portnoi & Horovitz, 1977	0	0.068
323	Hemerocallis fulva	Hemerocallis fulva (L.) L.	Cultivated	Angiosperm	Asphodelaceae	Monocot	Bicellular	Wet	NA	Portnoi	1977	1	https://watermark.silverchair.com/41-1-21.pdf?token=AQECAHi208BE49Ooan9kkhW_Ercy7Dm3ZL_9Cf3qfKAc485ysgAAAp0wggKZBgkqhkiG9w0BBwagggKKMIIChgIBADCCAn8GCSqGSIb3DQEHATAeBglghkgBZQMEAS4wEQQM-UltVnBGDnBvybtPAgEQgIICUBR7_zvYReMzhAnMEVk74KmHTgZ0gMskjHk1wbzYUozSSlAlVlvLZjtY3LuhyEmo6av99YJlwb48_FCopd7Cu6Fza2-HkIslbKXSSQmWEjt0vkq2zGH3sPzIAWLdyZc5U5NB-lyDIykUf07brRYgXrOf70NM98qLgchdL_rocauM0M4zRQFXDjIfbjuf0ht…	Portnoi & Horovitz, 1977	0.02	0.151
324	Yucca aloifolia	Yucca aloifolia L.	Wild	Angiosperm	Asparagaceae	Monocot	Bicellular	Dry	NA	Portnoi	1977	1	https://watermark.silverchair.com/41-1-21.pdf?token=AQECAHi208BE49Ooan9kkhW_Ercy7Dm3ZL_9Cf3qfKAc485ysgAAAp0wggKZBgkqhkiG9w0BBwagggKKMIIChgIBADCCAn8GCSqGSIb3DQEHATAeBglghkgBZQMEAS4wEQQM-UltVnBGDnBvybtPAgEQgIICUBR7_zvYReMzhAnMEVk74KmHTgZ0gMskjHk1wbzYUozSSlAlVlvLZjtY3LuhyEmo6av99YJlwb48_FCopd7Cu6Fza2-HkIslbKXSSQmWEjt0vkq2zGH3sPzIAWLdyZc5U5NB-lyDIykUf07brRYgXrOf70NM98qLgchdL_rocauM0M4zRQFXDjIfbjuf0ht…	Portnoi & Horovitz, 1977	0	0.202
325	Citrus aurantium	Citrus aurantium L.	Cultivated	Angiosperm	Rutaceae	Dicot	Bicellular	Wet	Starchy and starchless	Portnoi	1977	1	https://watermark.silverchair.com/41-1-21.pdf?token=AQECAHi208BE49Ooan9kkhW_Ercy7Dm3ZL_9Cf3qfKAc485ysgAAAp0wggKZBgkqhkiG9w0BBwagggKKMIIChgIBADCCAn8GCSqGSIb3DQEHATAeBglghkgBZQMEAS4wEQQM-UltVnBGDnBvybtPAgEQgIICUBR7_zvYReMzhAnMEVk74KmHTgZ0gMskjHk1wbzYUozSSlAlVlvLZjtY3LuhyEmo6av99YJlwb48_FCopd7Cu6Fza2-HkIslbKXSSQmWEjt0vkq2zGH3sPzIAWLdyZc5U5NB-lyDIykUf07brRYgXrOf70NM98qLgchdL_rocauM0M4zRQFXDjIfbjuf0ht…	Portnoi & Horovitz, 1977	0.02	9.01% (glucose)
326	Solanum nigrum L.	Solanum americanum Mill.	Wild	Angiosperm	Solanaceae	Dicot	Bicellular	Wet	Starchy and starchless	Ghosh	1977	1	https://link.springer.com/content/pdf/10.1007/BF02922732.pdf	Ghosh & Shivanna, 1977		0.1	1.62								2.71	1.67				0.99
327	Trigonella foenum-graecum	Trigonella foenum-graecum L.	Cultivated	Angiosperm	Fabaceae	Dicot	Bicellular	Wet	NA	Ghosh	1977	1	https://link.springer.com/content/pdf/10.1007/BF02922732.pdf	Ghosh & Shivanna, 1977		0.1	1.62								2.71	1.67				0.99
328	Vinca rosea L.	Catharanthus roseus (L.) G.Don	Cultivated	Angiosperm	Apocynaceae	Dicot	Bicellular	Dry and wet	Starchless	Bandyopadhyay	1977	1	https://www.tandfonline.com/doi/abs/10.1080/00173134.1977.11864644#aHR0cHM6Ly93d3cudGFuZGZvbmxpbmUuY29tL2RvaS9wZGYvMTAuMTA4MC8wMDE3MzEzNC4xOTc3LjExODY0NjQ0P25lZWRBY2Nlc3M9dHJ1ZUBAQDA=	Bandyopadhyay & Mukherjee, 1977	0	0.22
329	Juglans nigra L.	Juglans nigra L.	Cultivated	Angiosperm	Juglandaceae	Dicot	Bicellular	Dry	Starchless	Colombo	1977	1	https://www.jstor.org/stable/pdf/23689385.pdf?refreqid=excelsior%3A70bbbde64d0d3fa8f5523ec0d8c8cb63	Colombo et al., 1997	0	0.103	0.2
330	Betula pendula Roth.	Betula pendula Roth	Cultivated	Angiosperm	Betulaceae	Dicot	Bicellular	Dry	Starchy and starchless	Colombo	1977	1	https://www.jstor.org/stable/pdf/23689385.pdf?refreqid=excelsior%3A70bbbde64d0d3fa8f5523ec0d8c8cb63	Colombo et al., 1997	0	0.103	0.2
331	Hydrastis canadensis L.	Hydrastis canadensis L.	Wild	Angiosperm	Ranunculaceae	Dicot	Bicellular	Dry	Starchy and starchless	Colombo	1977	1	https://www.jstor.org/stable/pdf/23689385.pdf?refreqid=excelsior%3A70bbbde64d0d3fa8f5523ec0d8c8cb63	Colombo et al., 1997	0	0.103	0.2
332	Philadelphia coronarius L.	Philadelphus coronarius L.	Wild	Angiosperm	Hydrangeaceae	Dicot	Bicellular	Dry	NA	Colombo	1977	1	https://www.jstor.org/stable/pdf/23689385.pdf?refreqid=excelsior%3A70bbbde64d0d3fa8f5523ec0d8c8cb63	Colombo et al., 1997	0	0.103	0.2
333	Prunus cerasus L.	Prunus cerasus L.	Cultivated	Angiosperm	Rosaceae	Dicot	Bicellular	Wet	Starchy and starchless	Colombo	1977	1	https://www.jstor.org/stable/pdf/23689385.pdf?refreqid=excelsior%3A70bbbde64d0d3fa8f5523ec0d8c8cb63	Colombo et al., 1997	0	0.103	0.2
334	Anagyris foetida L.	Anagyris foetida L.	Wild	Angiosperm	Fabaceae	Dicot	Bicellular	Wet	NA	Colombo	1977	1	https://www.jstor.org/stable/pdf/23689385.pdf?refreqid=excelsior%3A70bbbde64d0d3fa8f5523ec0d8c8cb63	Colombo et al., 1997	0	0.103	0.2
335	Caragana frutex	Caragana frutex (L.)K.Koch	Wild	Angiosperm	Fabaceae	Dicot	Bicellular	Wet	NA	Colombo	1977	1	https://www.jstor.org/stable/pdf/23689385.pdf?refreqid=excelsior%3A70bbbde64d0d3fa8f5523ec0d8c8cb63	Colombo et al., 1997	0	0.103	0.2
336	Primula obconica	Primula obconica Hance	Wild	Angiosperm	Primulaceae	Dicot	Bicellular	Dry	Starchless	Colombo	1977	1	https://www.jstor.org/stable/pdf/23689385.pdf?refreqid=excelsior%3A70bbbde64d0d3fa8f5523ec0d8c8cb63	Colombo et al., 1997	0	0.103	0.2
337	Digitalis grandiflora	Digitalis grandiflora Mill.	Wild	Angiosperm	Plantaginaceae	Dicot	Bicellular	Dry	Starchy	Colombo	1977	1	https://www.jstor.org/stable/pdf/23689385.pdf?refreqid=excelsior%3A70bbbde64d0d3fa8f5523ec0d8c8cb63	Colombo et al., 1997	0	0.068	0.2
338	Gasteria sp.	Gasteria sp.	Wild	Angiosperm	Asphodelaceae	Monocot	Bicellular	Wet	NA	Colombo	1977	1	https://www.jstor.org/stable/pdf/23689385.pdf?refreqid=excelsior%3A70bbbde64d0d3fa8f5523ec0d8c8cb63	Colombo et al., 1997	0	0.103	0.2
339	Omithogalum excapum	Ornithogalum exscapum Ten.	Wild	Angiosperm	Asparagaceae	Monocot	Bicellular	Dry	NA	Colombo	1977	1	https://www.jstor.org/stable/pdf/23689385.pdf?refreqid=excelsior%3A70bbbde64d0d3fa8f5523ec0d8c8cb63	Colombo et al., 1997	0	0.103	0.2
340	Endymion non-scriptus (L.) Garcke	Hyacinthoides non-scripta (L.) Chouard ex Rothm.	Wild	Angiosperm	Asparagaceae	Monocot	Bicellular	Dry	NA	Colombo	1977	1	https://www.jstor.org/stable/pdf/23689385.pdf?refreqid=excelsior%3A70bbbde64d0d3fa8f5523ec0d8c8cb63	Colombo et al., 1997	0	0.103	0.2
341	Theobroma cacao L.	Theobroma cacao L.	Cultivated	Angiosperm	Malvaceae	Dicot	Bicellular	Dry	Starchy	Ravindran	1977	0	http://www.sidalc.net/cgi-bin/wxis.exe/?IsisScript=orton.xis&method=post&formato=2&cantidad=1&expresion=mfn=027673	Ravindran, 1977	?	0.15	1.62			0.61
342	Malus domestica	Malus domestica Borkh.	Cultivated	Angiosperm	Rosaceae	Dicot	Bicellular	Wet	Starchy and starchless	Polacco	1977	1	https://reader.elsevier.com/reader/sd/pii/030442117790089X?token=521035CA0DA62F7C9DD16807F26A29557803E2084ABFA0D331A976E97705DE52126B2E02EC990E37BB75D2B0D7411C74	Polacco & Sands, 1977	0	0.1	1.62			1.28 (4H2O)						0.82 (7H2O)				0.99																			50.46 MES
343	Malus domestica	Malus domestica Borkh.	Cultivated	Angiosperm	Rosaceae	Dicot	Bicellular	Wet	Starchy and starchless	Polacco	1977	1	https://reader.elsevier.com/reader/sd/pii/030442117790089X?token=521035CA0DA62F7C9DD16807F26A29557803E2084ABFA0D331A976E97705DE52126B2E02EC990E37BB75D2B0D7411C74	Polacco & Sands, 1977	0.011	0.1	1.62			1.28 (4H2O)						0.82 (7H2O)				0.99																			50.46 MES
344	Medicago sativa	Medicago sativa L.	Cultivated	Angiosperm	Fabaceae	Dicot	Bicellular	Wet	NA	Sinska	1977	0	http://apps.webofknowledge.com/full_record.do?product=UA&search_mode=GeneralSearch&qid=4&SID=E3UkM97qYGrmoyJGT4u&page=1&doc=24&cacheurlFromRightClick=no	Sinska & Bezova, 1977	0.02	0.15
345	Narcissus tazetta L.	Narcissus tazetta L.	Cultivated	Angiosperm	Amaryllidaceae	Monocot	Bicellular	Dry	Starchless	Chen	1977	1	https://link.springer.com/content/pdf/10.1007/BF02489340.pdf	Chen & Ueda, 1977	0.01	0.068
346	Narcissus tazetta L.	Narcissus tazetta L.	Cultivated	Angiosperm	Amaryllidaceae	Monocot	Bicellular	Dry	Starchless	Chen	1977	1	https://link.springer.com/content/pdf/10.1007/BF02489340.pdf	Chen & Ueda, 1977	0	0.068
347	Narcissus pseudonarcissus L.	Narcissus pseudonarcissus L.	Cultivated	Angiosperm	Amaryllidaceae	Monocot	Bicellular	Dry	Starchless	Chen	1977	1	https://link.springer.com/content/pdf/10.1007/BF02489340.pdf	Chen & Ueda, 1977	0.01	0.068
348	Narcissus pseudonarcissus L.	Narcissus pseudonarcissus L.	Cultivated	Angiosperm	Amaryllidaceae	Monocot	Bicellular	Dry	Starchless	Chen	1977	1	https://link.springer.com/content/pdf/10.1007/BF02489340.pdf	Chen & Ueda, 1977	0	0.068
349	Narcissus sp.(trumpet poeticus hybrid)	Narcissus poeticus L.	Cultivated	Angiosperm	Amaryllidaceae	Monocot	Bicellular	Dry	Starchless	Chen	1977	1	https://link.springer.com/content/pdf/10.1007/BF02489340.pdf	Chen & Ueda, 1977	0.01	0.068
350	Narcissus sp.(trumpet poeticus hybrid)	Narcissus poeticus L.	Cultivated	Angiosperm	Amaryllidaceae	Monocot	Bicellular	Dry	Starchless	Chen	1977	1	https://link.springer.com/content/pdf/10.1007/BF02489340.pdf	Chen & Ueda, 1977	0	0.068
351	Narcissus poetaz	Narcissus ×medioluteus Mill. (pro sp.)	Cultivated	Angiosperm	Amaryllidaceae	Monocot	Bicellular	Dry	Starchless	Chen	1977	1	https://link.springer.com/content/pdf/10.1007/BF02489340.pdf	Chen & Ueda, 1977	0.01	0.034
352	Narcissus poetaz	Narcissus ×medioluteus Mill. (pro sp.)	Cultivated	Angiosperm	Amaryllidaceae	Monocot	Bicellular	Dry	Starchless	Chen	1977	1	https://link.springer.com/content/pdf/10.1007/BF02489340.pdf	Chen & Ueda, 1977	0	0.034
353	Petunia hybrida L.	Petunia hybrida Vilm.	Cultivated	Angiosperm	Solanaceae	Dicot	Bicellular	Wet	Starchy and starchless	Gilissen	1978	1	https://reader.elsevier.com/reader/sd/pii/0098847278900011?token=3383137514B23DD26215D2F4D05CF19BC205278629C0FC1F1639CAEB92008EFFAB2F518D188935307AF0EE90C798F420	Gilissen, 1978	0	0.1	1.62
354	Russelia equisetiformis Sch.	Russelia equisetiformis Schltdl. & Cham.	Cultivated	Angiosperm	Plantaginaceae	Dicot	Bicellular	Dry	Starchy	Sahu	1978	0	http://apps.webofknowledge.com/full_record.do?product=UA&search_mode=GeneralSearch&qid=4&SID=D4bWdKEuqn671tRbjHg&page=1&doc=6&cacheurlFromRightClick=no	Sahu, 1978		0.2				0.19						0.17				0.1
355	Cucumis sativus	Cucumis sativus L.	Cultivated	Angiosperm	Cucurbitaceae	Dicot	Bicellular	Dry	Starchy and starchless	Gentile	1978	1	https://academic.oup.com/ee/article/7/5/689/2396182	Gentile et al., 1978	0.0735	0.92	14.56			17.07						14.96				8.91
356	Amaryllis vittata L'Hér.	Hippeastrum vittatum (L'Hér.) Herb.	Wild	Angiosperm	Amaryllidaceae	Monocot	Bicellular	Dry	Starchless	Singh	1978	1	https://academic.oup.com/pcp/article/19/4/677/1810019	Singh et al., 1978		0.012	0.33
357	Tectona grandis L.	Tectona grandis L.f.	Cultivated	Angiosperm	Lamiaceae	Dicot	Bicellular	Dry	NA	Egenti	1978	1	https://www.thuenen.de/media/institute/fg/PDF/Silvae_Genetica/1978/Vol._27_Heft_1/27_1_29.pdf	Egenti, 1978		0.14
358	Antirrhinum majus L.	Antirrhinum majus L.	Wild	Angiosperm	Plantaginaceae	Dicot	Bicellular	Dry	Starchy	Iwanami	1978	1	https://www.jstor.org/stable/2474026?seq=1#metadata_info_tab_contents	Iwanami & Iwadare, 1978	0.01	0.1
359	Camellia japonica L.	Camellia japonica L.	Cultivated	Angiosperm	Theaceae	Dicot	Bicellular	Wet	Starchless	Iwanami	1978	1	https://www.jstor.org/stable/2474026?seq=1#metadata_info_tab_contents	Iwanami & Iwadare, 1978	0.01	0.1
360	Hyacinthus orientalis L.	Hyacinthus orientalis L.	Wild	Angiosperm	Asparagaceae	Monocot	Bicellular	Dry	NA	Iwanami	1978	1	https://www.jstor.org/stable/2474026?seq=1#metadata_info_tab_contents	Iwanami & Iwadare, 1978	0.01	0.1
361	Impatiens balsamina L.	Impatiens balsamina L.	Wild	Angiosperm	Balsaminaceae	Dicot	Bicellular	Wet	Starchy	Iwanami	1978	1	https://www.jstor.org/stable/2474026?seq=1#metadata_info_tab_contents	Iwanami & Iwadare, 1978	0.01	0.1
362	Lilium speciosum Thunb.	Lilium speciosum Thunb.	Wild	Angiosperm	Liliaceae	Monocot	Bicellular	Wet	Starchless	Iwanami	1978	1	https://www.jstor.org/stable/2474026?seq=1#metadata_info_tab_contents	Iwanami & Iwadare, 1978	0.01	0.1
363	Typha latifolia L.	Typha latifolia L.	Wild	Angiosperm	Typhaceae	Monocot	Bicellular	Dry	Starchy	Hoekstra	1979	1	https://link.springer.com/article/10.1007/BF00379924	Hoekstra, 1979	0	0.068	1.6
364	Nicotiana alata	Nicotiana alata Link & Otto	Wild	Angiosperm	Solanaceae	Dicot	Bicellular	Wet	Starchy and starchless	Hoekstra	1979	1	https://link.springer.com/article/10.1007/BF00379924	Hoekstra, 1979	0	0.103	0.5			0.3 (4H2O)
365	Tradescantia paludosa E.S.Anderson & Woodson	Tradescantia ohiensis Raf.	Wild	Angiosperm	Commelinaceae	Monocot	Bicellular	Dry	Starchless	Hoekstra	1979	1	https://link.springer.com/article/10.1007/BF00379924	Hoekstra, 1979	0	0.051	1.6			2.1 (4H2O)
366	Aster tripolium L.	Tripolium pannonicum subsp. tripolium (L.) Greuter	Wild	Angiosperm	Asteraceae	Dicot	Tricellular	Dry	NA	Hoekstra	1979	1	https://link.springer.com/article/10.1007/BF00379924	Hoekstra, 1979	0	0.342	1.6			2.1 (4H2O)
367	Cicer arietinum	Cicer arietinum L.	Wild	Angiosperm	Fabaceae	Dicot	Bicellular	Wet	NA	Mercy	1979	0	http://apps.webofknowledge.com/full_record.do?product=UA&search_mode=GeneralSearch&qid=3&SID=C6HCXlvckzKPY1FOUZv&page=1&doc=3&cacheurlFromRightClick=no	Mercy et al., 1979		0.171	1.62
368	Cicer soongaricum DC.	Cicer songaricum DC.	Wild	Angiosperm	Fabaceae	Dicot	Bicellular	Wet	NA	Mercy	1979	0	http://apps.webofknowledge.com/full_record.do?product=UA&search_mode=GeneralSearch&qid=3&SID=C6HCXlvckzKPY1FOUZv&page=1&doc=3&cacheurlFromRightClick=no	Mercy et al., 1979		0.171	1.62
369	Zea mays L.	Zea mays L.	Cultivated	Angiosperm	Poaceae	Monocot	Tricellular	Dry	NA	Frova	1979	1	https://academic.oup.com/aob/article/43/1/75/150187	Frova & Feder, 1979	0.7%(bactoagar)	0.15				1.83
370	Vanilla planifolia	Vanilla planifolia Jacks. ex Andrews	Cultivated	Angiosperm	Orchidaceae	Monocot	Bicellular	Wet	Starchless	Ravindran	1979	1	https://www.jstage.jst.go.jp/article/cytologia1929/44/2/44_2_391/_pdf	Ravindran, 1979		0.1	1.62			0.61
371	Ananas comosus	Ananas comosus (L.) Merr.	Cultivated	Angiosperm	Bromeliaceae	Monocot	Bicellular	Wet	Starchless	Wee	1979	1	https://www.tandfonline.com/doi/abs/10.1080/00173137909428868#aHR0cHM6Ly93d3cudGFuZGZvbmxpbmUuY29tL2RvaS9wZGYvMTAuMTA4MC8wMDE3MzEzNzkwOTQyODg2OD9uZWVkQWNjZXNzPXRydWVAQEAw	Wee & Rao, 1979	1% (bacto agar)	0.15	1.62			1.22
372	Ananas bracteatus	Ananas bracteatus (Lindl.) Schult. & Schult.f.	Cultivated	Angiosperm	Bromeliaceae	Monocot	Bicellular	Wet	Starchless	Wee	1979	1	https://www.tandfonline.com/doi/abs/10.1080/00173137909428868#aHR0cHM6Ly93d3cudGFuZGZvbmxpbmUuY29tL2RvaS9wZGYvMTAuMTA4MC8wMDE3MzEzNzkwOTQyODg2OD9uZWVkQWNjZXNzPXRydWVAQEAw	Wee & Rao, 1979	1% (bacto agar)	0.15	1.62			1.22
373	Salix tetrasperma	Salix tetrasperma Roxb.	Wild	Angiosperm	Salicaceae	Dicot	Bicellular	Dry	Starchless	Khurana	1979	0	http://apps.webofknowledge.com/full_record.do?product=UA&search_mode=GeneralSearch&qid=4&SID=E6AjcFeE8716M44ZUTj&page=2&doc=65&cacheurlFromRightClick=no	Khurana & Khosla, 1979	0	0.15
374	Populus deltoides	Populus deltoides Marshall	Wild	Angiosperm	Salicaceae	Dicot	Bicellular	Dry	Starchless	Khurana	1979	0	http://apps.webofknowledge.com/full_record.do?product=UA&search_mode=GeneralSearch&qid=4&SID=E6AjcFeE8716M44ZUTj&page=2&doc=65&cacheurlFromRightClick=no	Khurana & Khosla, 1979	0	0.1
375	Pyrus pashia	Pyrus pashia Buch.-Ham. ex D.Don	Wild	Angiosperm	Rosaceae	Dicot	Bicellular	Wet	Starchy and starchless	Khurana	1979	0	http://apps.webofknowledge.com/full_record.do?product=UA&search_mode=GeneralSearch&qid=4&SID=E6AjcFeE8716M44ZUTj&page=2&doc=65&cacheurlFromRightClick=no	Khurana & Khosla, 1979	0	0.1
376	Populus ciliata	Populus ciliata Wall. ex Royle	Wild	Angiosperm	Salicaceae	Dicot	Bicellular	Dry	Starchless	Khurana	1979	0	http://apps.webofknowledge.com/full_record.do?product=UA&search_mode=GeneralSearch&qid=4&SID=E6AjcFeE8716M44ZUTj&page=2&doc=65&cacheurlFromRightClick=no	Khurana & Khosla, 1979	0.01
377	Betula pendula	Betula pendula Roth	Cultivated	Angiosperm	Betulaceae	Dicot	Bicellular	Dry	Starchy and starchless	Kaleda	1979	0	http://apps.webofknowledge.com/full_record.do?product=UA&search_mode=GeneralSearch&qid=2&SID=E1DBoFtn3Y8Ip9KBoYz&page=1&doc=39&cacheurlFromRightClick=no	Kalenda, 1979		0.1
378	Petunia hybrida	Petunia hybrida Vilm.	Cultivated	Angiosperm	Solanaceae	Dicot	Bicellular	Wet	Starchy and starchless	Jackson	1979	1	https://link.springer.com/article/10.1007%2FBF00334289	Jackson & Linskens, 1979		0.1	1.62
379	Vicia faba	Vicia faba L.	Cultivated	Angiosperm	Fabaceae	Dicot	Bicellular	Wet	NA	Lim	1979	1	https://core.ac.uk/download/pdf/42989327.pdf	Lim et al., 1979	0.02	0.25
380	Pseudotsuga menziesii	Pseudotsuga menziesii (Mirb.) Franco	Cultivated	Gymnosperm	Pinaceae				NA	Muren	1979	1	https://onlinelibrary.wiley.com/doi/epdf/10.1111/j.1399-3054.1979.tb02623.x	Muren et al., 1979	0		1.62			1.27 (4H2O)						0.81 (7H2O)						2.2
381	Pyrus communis L.	Pyrus communis L.	Cultivated	Angiosperm	Rosaceae	Dicot	Bicellular	Wet	Starchy and starchless	Rosenfield	1979	1	https://watermark.silverchair.com/20-3-605.pdf?token=AQECAHi208BE49Ooan9kkhW_Ercy7Dm3ZL_9Cf3qfKAc485ysgAAAqAwggKcBgkqhkiG9w0BBwagggKNMIICiQIBADCCAoIGCSqGSIb3DQEHATAeBglghkgBZQMEAS4wEQQMepEVVua1Bz1QBD9XAgEQgIICU1EHXGf9tsdHm004E7GPVxMx1iClurKHJBU3XwHGUti5S6skNEFM5hQugN3kTZRU3phPwFbArhHo-WydVP_uM4VUPoU_VVMsfhsaKSN2mk3tPqXzPF-Q-v2rzNp3PGry4LrKYHgK5UVmhojivpxxFIAR7tJEaWAIc-P1SgZ3r03n-RPoA38_wNp6ayXOAt…	Rosenfield & Matile, 1979		21.19% (raffinose)	1.62						2
382	Malus domestica	Malus domestica Borkh.	Cultivated	Angiosperm	Rosaceae	Dicot	Bicellular	Wet	Starchy and starchless	Calzoni	1979	1	https://www.sciencedirect.com/science/article/pii/0304423879900682	Calzoni et al., 1979	0	0.068	0.33			1.28 (4H2O)
383	Crotalaria juncea	Crotalaria juncea L.	Cultivated	Angiosperm	Fabaceae	Dicot	Bicellular	Wet	NA	Bhandal	1980	1	https://academic.oup.com/aob/article/45/5/591/119415	Bhandal & Malik, 1980		0.03	0.33
384	Campsis grandiflora	Campsis grandiflora (Thunb.) K.Schum.	Wild	Angiosperm	Bignoniaceae	Dicot	Bicellular	Wet	Starchy and starchless	Bhandal	1980	1	https://academic.oup.com/aob/article/45/5/591/119415	Bhandal & Malik, 1980		0.085	0.81
385	Argemone mexicana	Argemone mexicana L.	Wild	Angiosperm	Papaveraceae	Dicot	Bicellular	Dry	Starchless	Bhandal	1980	1	https://academic.oup.com/aob/article/45/5/591/119415	Bhandal & Malik, 1980		0.06	0.17
386	Crinum asiaticum	Crinum asiaticum L.	Wild	Angiosperm	Amaryllidaceae	Monocot	Bicellular	Dry	Starchless	Bhandal	1980	1	https://academic.oup.com/aob/article/45/5/591/119415	Bhandal & Malik, 1980		0.1	0.81
387	Zea mays	Zea mays L.	Cultivated	Angiosperm	Poaceae	Monocot	Tricellular	Dry	NA	Pfahler	1980	0	https://www.nrcresearchpress.com/doi/abs/10.1139/b80-068#.XrOt16hzQ2w	Pfahler et al., 1980	0.6%(bactoagar)	0.15	1.62			1.83
388	Ziziphus mauritiana Lam.	Ziziphus jujuba Mill.	Cultivated	Angiosperm	Rhamnaceae	Dicot	Bicellular	Dry	Starchless	Daulta	1980	0	http://apps.webofknowledge.com/full_record.do?product=UA&search_mode=GeneralSearch&qid=2&SID=C46XgIQC6znBgmaWoFT&page=1&doc=14&cacheurlFromRightClick=no	Daulta & Sareen, 1980		0.2	80.87
389	Ziziphus mauritiana Lam.	Ziziphus jujuba Mill.	Cultivated	Angiosperm	Rhamnaceae	Dicot	Bicellular	Dry	Starchless	Daulta	1980	0	http://apps.webofknowledge.com/full_record.do?product=UA&search_mode=GeneralSearch&qid=2&SID=C46XgIQC6znBgmaWoFT&page=1&doc=14&cacheurlFromRightClick=no	Daulta & Sareen, 1980		0.1	80.87
390	Cicer arietinum L.	Cicer arietinum L.	Wild	Angiosperm	Fabaceae	Dicot	Bicellular	Wet	NA	Savithri	1980	1	https://academic.oup.com/jxb/article/31/2/475/488730	Savithri et al., 1980		0.1	1.62			1.83						1.66				0.99
391	Vitis labrusca L. × Vitis vinifera L.	Vitis labrusca L.	Cultivated	Angiosperm	Vitaceae	Dicot	Bicellular	Dry	Starchless	Naito	1980	1	https://www.jstage.jst.go.jp/article/jjshs1925/49/3/49_3_297/_pdf	Naito et al., 1974	0.01	0.2
392	Pinus patula	Pinus patula Schiede ex Schltdl. & Cham.	Wild	Gymnosperm	Pinaceae				NA	Kapoor	1980	0	https://www.osti.gov/etdeweb/biblio/6048260	Kapoor & Dobriyal, 1980	0.02	0.125	0.17
393	Lilium longiflorum Thunb.	Lilium longiflorum Thunb.	Wild	Angiosperm	Liliaceae	Monocot	Bicellular	Wet	Starchless	Deshusses	1981	1	http://www.plantphysiol.org/content/plantphysiol/67/4/793.full.pdf	Deshusses et al., 1981			0.17			1.27										0.99													290
394	Lilium longiflorum	Lilium longiflorum Thunb.	Wild	Angiosperm	Liliaceae	Monocot	Bicellular	Wet	Starchless	Dashek	1981	1	https://www.researchgate.net/publication/276514452_Praline_metabolism_by_germinating_Lilium_longiflorum_pollen_I_Labelling_of_cytoplasmic_wall_and_culture_medium_molecules	Dashek & Mills, 1981		0.1	0.17
395	Camellia japonica	Camellia japonica L.	Cultivated	Angiosperm	Theaceae	Dicot	Bicellular	Wet	Starchless	Kobayashi	1981	1	https://www.tandfonline.com/doi/abs/10.1080/00021369.1981.10864741#aHR0cHM6Ly93d3cudGFuZGZvbmxpbmUuY29tL2RvaS9wZGYvMTAuMTA4MC8wMDAyMTM2OS4xOTgxLjEwODY0NzQxP25lZWRBY2Nlc3M9dHJ1ZUBAQDA=	Kobayashi et al., 1981	0.012	0.1	0.17
396	Pinus densiflora	Pinus densiflora Siebold & Zucc.	Wild	Gymnosperm	Pinaceae				NA	Kobayashi	1981	1	https://www.tandfonline.com/doi/abs/10.1080/00021369.1981.10864741#aHR0cHM6Ly93d3cudGFuZGZvbmxpbmUuY29tL2RvaS9wZGYvMTAuMTA4MC8wMDAyMTM2OS4xOTgxLjEwODY0NzQxP25lZWRBY2Nlc3M9dHJ1ZUBAQDA=	Kobayashi et al., 1981		0.02	0.17			0.07						0.09
397	Lilium auratum	Lilium auratum Lindl.	Wild	Angiosperm	Liliaceae	Monocot	Bicellular	Wet	Starchless	Kobayashi	1981	1	https://www.tandfonline.com/doi/abs/10.1080/00021369.1981.10864741#aHR0cHM6Ly93d3cudGFuZGZvbmxpbmUuY29tL2RvaS9wZGYvMTAuMTA4MC8wMDAyMTM2OS4xOTgxLjEwODY0NzQxP25lZWRBY2Nlc3M9dHJ1ZUBAQDA=	Kobayashi et al., 1981	0.012	0.1	0.17
398	Impatience balsamina	Impatiens balsamina L.	Wild	Angiosperm	Balsaminaceae	Dicot	Bicellular	Wet	Starchy	Kobayashi	1981	1	https://www.tandfonline.com/doi/abs/10.1080/00021369.1981.10864741#aHR0cHM6Ly93d3cudGFuZGZvbmxpbmUuY29tL2RvaS9wZGYvMTAuMTA4MC8wMDAyMTM2OS4xOTgxLjEwODY0NzQxP25lZWRBY2Nlc3M9dHJ1ZUBAQDA=	Kobayashi et al., 1981	0.012	0.1	0.17
399	Camellia sinensis	Camellia sinensis (L.) Kuntze	Wild	Angiosperm	Theaceae	Dicot	Bicellular	Wet	Starchless	Kobayashi	1981	1	https://www.tandfonline.com/doi/abs/10.1080/00021369.1981.10864741#aHR0cHM6Ly93d3cudGFuZGZvbmxpbmUuY29tL2RvaS9wZGYvMTAuMTA4MC8wMDAyMTM2OS4xOTgxLjEwODY0NzQxP25lZWRBY2Nlc3M9dHJ1ZUBAQDA=	Kobayashi et al., 1981	0.012	0.1	0.17
400	Secale cereale	Secale cereale L.	Cultivated	Angiosperm	Poaceae	Monocot	Tricellular	Dry	NA	Shivanna	1981	1	https://academic.oup.com/aob/article/47/6/759/185372	Shivanna et al., 1983	0.01	0.2	1			1
401	Lonicera periclymenum	Lonicera periclymenum L.	Cultivated	Angiosperm	Caprifoliaceae	Dicot	Tricellular	Wet	Starchy	Shivanna	1981	1	https://academic.oup.com/aob/article/47/6/759/185372	Shivanna & Heslop-Harrison, 1981	0	0.2	1			1							1			1
402	Eleocharis palustris	Eleocharis palustris (L.) Roem. & Schult.	Wild	Angiosperm	Cyperaceae	Monocot	Tricellular	Dry	Starchy and starchless	Shivanna	1981	1	https://academic.oup.com/aob/article/47/6/759/185372	Shivanna & Heslop-Harrison, 1981	0	0.2	1			1							1			1
403	Plantago lanceolata	Plantago lanceolata L.	Wild	Angiosperm	Plantaginaceae	Dicot	Mixed	Dry	Starchy	Shivanna	1981	1	https://academic.oup.com/aob/article/47/6/759/185372	Shivanna & Heslop-Harrison, 1981	0	0.1	1			1							1			1
404	Cytisus battandieri Maire	Argyrocytisus battandieri (Maire)Raynaud	Cultivated	Angiosperm	Fabaceae	Dicot	Bicellular	Wet	NA	Shivanna	1981	1	https://academic.oup.com/aob/article/47/6/759/185372	Shivanna & Heslop-Harrison, 1981	0	0.1	1			1							1			1
405	Carex spp.	Carex sp.	Wild	Angiosperm	Cyperaceae	Monocot	Tricellular	Dry	Starchy and starchless	Shivanna	1981	1	https://academic.oup.com/aob/article/47/6/759/185372	Shivanna & Heslop-Harrison, 1981	0	0.15	1			1							1			1
406	Digitalis purpurea	Digitalis purpurea L.	Wild	Angiosperm	Plantaginaceae	Dicot	Bicellular	Dry	Starchy	Shivanna	1981	1	https://academic.oup.com/aob/article/47/6/759/185372	Shivanna & Heslop-Harrison, 1981	0	0.05	1			1							1			1
407	Impatiens sultanii Hook. f.	Impatiens walleriana Hook.f.	Wild	Angiosperm	Balsaminaceae	Dicot	Bicellular	Wet	Starchy	Bilderback	1981	1	https://ehp.niehs.nih.gov/doi/pdf/10.1289/ehp.813795	Bilderback, 1981	0		16.16								1							0.1
408	Vaccinium corymbosum L.	Vaccinium corymbosum L.	Cultivated	Angiosperm	Ericaceae	Dicot	Bicellular	Wet	Starchless	Bristow	1981	1	https://www.apsnet.org/publications/PlantDisease/BackIssues/Documents/1981Articles/PlantDisease65n04_350.PDF	Bristow & PR, 1981	0.05	0.09
409	Amaryllis vittata L'Hér.	Hippeastrum vittatum (L'Hér.) Herb.	Wild	Angiosperm	Amaryllidaceae	Monocot	Bicellular	Dry	Starchless	Sharma	1981	1	https://link.springer.com/article/10.1007/BF03052934	Sharma et al., 1981		0.034	0.17
410	Lilium longiflorum	Lilium longiflorum Thunb.	Wild	Angiosperm	Liliaceae	Monocot	Bicellular	Wet	Starchless	Tanaka	1981	1	https://watermark.silverchair.com/22-1-149.pdf?token=AQECAHi208BE49Ooan9kkhW_Ercy7Dm3ZL_9Cf3qfKAc485ysgAAAqAwggKcBgkqhkiG9w0BBwagggKNMIICiQIBADCCAoIGCSqGSIb3DQEHATAeBglghkgBZQMEAS4wEQQMEGep79JZNRfUHBj2AgEQgIICU89dJ64FbDgI9sUGPk8nFNG5qwvW-I32vt6i5FJC6UBInADm9x8c3PX_z3zI_y_VPsZS7CG1S9DVMIKz66bWCj5-wqn8NTmxbVBjLRq2SE26LsB_r9Ftn5yPSxCFm6mFh62Qh51_fZcg0Oc7-ba7QT4hoozgE2n23KHB1oKG2C59gWiMm5Sd3EjqP_YSSA…	Tanaka & Iko, 1981	0.04	0.103
411	Dioscorea opposita Thunb.	Dioscorea oppositifolia L.	Cultivated	Angiosperm	Dioscoreaceae	Monocot	Bicellular	Wet	NA	Araki	1981	1	https://eprints.lib.hokudai.ac.jp/dspace/bitstream/2115/12959/1/60%283%29_p229-235.pdf	Araki et al., 1981	0.05		1.62
412	Zea mays	Zea mays L.	Cultivated	Angiosperm	Poaceae	Monocot	Tricellular	Dry	NA	Pfahler	1981	1	https://ehp.niehs.nih.gov/doi/pdf/10.1289/ehp.8137125	Pfahler, 1981	0.6%(bactoagar)	0.15
413	Nicotiana tabacum	Nicotiana tabacum L.	Cultivated	Angiosperm	Solanaceae	Dicot	Bicellular	Wet	Starchy and starchless	Feder	1981	1	https://ehp.niehs.nih.gov/doi/pdf/10.1289/ehp.8137117	Feder, 1981	0.75% (Difco-Bacto Agar)
414	Petunia hybrida	Petunia hybrida Vilm.	Cultivated	Angiosperm	Solanaceae	Dicot	Bicellular	Wet	Starchy and starchless	Feder	1981	1	https://ehp.niehs.nih.gov/doi/pdf/10.1289/ehp.8137117	Feder, 1982	0.75% (Difco-Bacto Agar)
415	Gossypium barbadense L.	Gossypium barbadense L.	Cultivated	Angiosperm	Malvaceae	Dicot	Bicellular	Dry	Starchy	Barrow	1981	1	https://pdfs.semanticscholar.org/3745/903e0a44d4323266e4f0b560b1e10a96c877.pdf?_ga=2.20568496.925481091.1588950243-218708052.1585738021	Barrow, 1981	0					0.86								0.93
416	Gossypium hirsutum L.	Gossypium hirsutum L.	Cultivated	Angiosperm	Malvaceae	Dicot	Bicellular	Dry	Starchy	Barrow	1981	1	https://pdfs.semanticscholar.org/3745/903e0a44d4323266e4f0b560b1e10a96c877.pdf?_ga=2.20568496.925481091.1588950243-218708052.1585738021	Barrow, 1981	0					0.86								0.93
417	Primula obconica	Primula obconica Hance	Wild	Angiosperm	Primulaceae	Dicot	Bicellular	Dry	Starchless	Stevens	1982	1	https://link.springer.com/article/10.1007/BF00273782	Stevens & Murray, 1982	0	0.1
418	Primula obconica	Primula obconica Hance	Wild	Angiosperm	Primulaceae	Dicot	Bicellular	Dry	Starchless	Stevens	1982	1	https://link.springer.com/article/10.1007/BF00273782	Stevens & Murray, 1982	0	0.1	0.1								0.4
419	Petunia hybrida	Petunia hybrida Vilm.	Cultivated	Angiosperm	Solanaceae	Dicot	Bicellular	Wet	Starchy and starchless	Zhang	1982	1	https://link.springer.com/content/pdf/10.1007/BF00387864.pdf	Hong-Qi et al., 1982	0	0.1	1.62
420	Zea mays L.	Zea mays L.	Cultivated	Angiosperm	Poaceae	Monocot	Tricellular	Dry	NA	Pfahler	1982	1	http://natuurtijdschriften.nl/download?type=document&docid=540399	Pfahler et al., 1982	0.6% (bacto‐agar)	0.15	1.62			1.83
421	Petunia hybrida	Petunia hybrida Vilm.	Cultivated	Angiosperm	Solanaceae	Dicot	Bicellular	Wet	Starchy and starchless	Zhang	1982	0	https://onlinelibrary.wiley.com/doi/abs/10.1111/j.1438-8677.1982.tb01597.x	Hong-Qi & Croes, 1982
422	Petunia hybrida	Petunia hybrida Vilm.	Cultivated	Angiosperm	Solanaceae	Dicot	Bicellular	Wet	Starchy and starchless	Jackson	1982	1	http://natuurtijdschriften.nl/download?type=document&docid=540434	Jackson & Linskens, 1982		0.1	1.62
423	Antirrhinum majus	Antirrhinum majus L.	Wild	Angiosperm	Plantaginaceae	Dicot	Bicellular	Dry	Starchy	Gabara	1982	1	https://pbsociety.org.pl/journals/index.php/asbp/article/view/asbp.1982.016/2753	Gabara, 1982	1.5% (bacto agar)	0.02	1.62			1.83						1.67				0.99
424	Campanula rapunculoides	Campanula rapunculoides L.	Wild	Angiosperm	Campanulaceae	Dicot	Bicellular	Dry	Starchless	Gabara	1982	1	https://pbsociety.org.pl/journals/index.php/asbp/article/view/asbp.1982.016/2753	Gabara, 1982	1.5% (bacto agar)	0.1	1.62			1.83						1.67				0.99
425	Eschscholtzia californica	Eschscholzia californica Cham.	Wild	Angiosperm	Papaveraceae	Dicot	Bicellular	Dry	Starchless	Gabara	1982	1	https://pbsociety.org.pl/journals/index.php/asbp/article/view/asbp.1982.016/2753	Gabara, 1982	1.5% (bacto agar)	0.1	1.62			1.83						1.67				0.99
426	Narcissus poeticus	Narcissus poeticus L.	Wild	Angiosperm	Amaryllidaceae	Monocot	Bicellular	Dry	Starchless	Gabara	1982	1	https://pbsociety.org.pl/journals/index.php/asbp/article/view/asbp.1982.016/2753	Gabara, 1982	1.5% (bacto agar)	0.02	1.62			1.83						1.67				0.99
427	Camellia japonica	Camellia japonica L.	Cultivated	Angiosperm	Theaceae	Dicot	Bicellular	Wet	Starchless	Nakamura	1982	1	https://www.jstor.org/stable/pdf/2443062.pdf	Nakamura et al., 1982	0.01	0.08
428	Nicotiana tabacum	Nicotiana tabacum L.	Cultivated	Angiosperm	Solanaceae	Dicot	Bicellular	Wet	Starchy and starchless	Suss	1982	1	https://link.springer.com/content/pdf/10.1007/BF02898489.pdf	Süss & Tupý, 1982		0.103	1.62			0.3
429	Coffea canephora (S. 274)	Coffea canephora Pierre ex A.Froehner	Cultivated	Angiosperm	Rubiaceae	Dicot	Bicellular	Dry	Starchless	Kumar	1982	0	http://apps.webofknowledge.com/full_record.do?product=UA&search_mode=GeneralSearch&qid=2&SID=D4bQADiHANSR3x9vea5&page=2&doc=17&cacheurlFromRightClick=no	Kumar et al., 1982	0	0.1
430	Coffea canephora (bulk robusta)	Coffea canephora Pierre ex A.Froehner	Cultivated	Angiosperm	Rubiaceae	Dicot	Bicellular	Dry	Starchless	Kumar	1982	0	http://apps.webofknowledge.com/full_record.do?product=UA&search_mode=GeneralSearch&qid=2&SID=D4bQADiHANSR3x9vea5&page=2&doc=17&cacheurlFromRightClick=no	Kumar et al., 1982	0	0.2
431	Camellia oleifera	Camellia oleifera Abel	Cultivated	Angiosperm	Theaceae	Dicot	Bicellular	Wet	Starchless	Kao	1982	0	http://apps.webofknowledge.com/full_record.do?product=UA&search_mode=GeneralSearch&qid=2&SID=D4bQADiHANSR3x9vea5&page=2&doc=18&cacheurlFromRightClick=no	Kao & Tsuei, 1982	0.008	0.14
432	Hevea camargoana Pires	Hevea brasiliensis (Willd. ex A.Juss.) Müll.Arg.	Wild	Angiosperm	Euphorbiaceae	Dicot	Tricellular	Dry	Starchy	Goncalves	1982	1	http://citeseerx.ist.psu.edu/viewdoc/download?doi=10.1.1.1003.8656&rep=rep1&type=pdf	Souza et al., 1982	0	0.2	1.62
433	Zea mays	Zea mays L.	Cultivated	Angiosperm	Poaceae	Monocot	Tricellular	Dry	NA	Mikel	1982	1	https://www.apsnet.org/publications/phytopathology/backissues/Documents/1982Articles/Phyto72n04_428.PDF	Mikel et al., 1982	0.6% (bacto‐agar)	0.15	1.62			1.83
434	Camellia sinensis	Camellia sinensis (L.) Kuntze	Wild	Angiosperm	Theaceae	Dicot	Bicellular	Wet	Starchless	Yamane	1982	1	https://watermark.silverchair.com/23-6-1125.pdf?token=AQECAHi208BE49Ooan9kkhW_Ercy7Dm3ZL_9Cf3qfKAc485ysgAAAqIwggKeBgkqhkiG9w0BBwagggKPMIICiwIBADCCAoQGCSqGSIb3DQEHATAeBglghkgBZQMEAS4wEQQMkeDyBfSEK7uSgab7AgEQgIICVQkqXycVfUWoNG2DNXi14K5iNkDjdcca-4ZKbjKnNb-uF_Eo6UipCvYobfyhp06bpJNfxUxaLJvKMWwhjD1if9YXj3duaPA3L4x9IvnBDR-1VwCWNSc-KkHYdBNkyJwm42Uy7OtnGUEtsVSXVc-3T77RaUilN_5RwgXcfwsrwG8qcpeb8TgJfUgUTxPdV…	Yamane et al., 1982	0.01	0.05
435	Camellia sasanqua	Camellia sasanqua Thunb.	Cultivated	Angiosperm	Theaceae	Dicot	Bicellular	Wet	Starchless	Yamane	1982	1	https://watermark.silverchair.com/23-6-1125.pdf?token=AQECAHi208BE49Ooan9kkhW_Ercy7Dm3ZL_9Cf3qfKAc485ysgAAAqIwggKeBgkqhkiG9w0BBwagggKPMIICiwIBADCCAoQGCSqGSIb3DQEHATAeBglghkgBZQMEAS4wEQQMkeDyBfSEK7uSgab7AgEQgIICVQkqXycVfUWoNG2DNXi14K5iNkDjdcca-4ZKbjKnNb-uF_Eo6UipCvYobfyhp06bpJNfxUxaLJvKMWwhjD1if9YXj3duaPA3L4x9IvnBDR-1VwCWNSc-KkHYdBNkyJwm42Uy7OtnGUEtsVSXVc-3T77RaUilN_5RwgXcfwsrwG8qcpeb8TgJfUgUTxPdV…	Yamane et al., 1982	0.01	0.1
436	Camellia japonica	Camellia japonica L.	Cultivated	Angiosperm	Theaceae	Dicot	Bicellular	Wet	Starchless	Yamane	1982	1	https://watermark.silverchair.com/23-6-1125.pdf?token=AQECAHi208BE49Ooan9kkhW_Ercy7Dm3ZL_9Cf3qfKAc485ysgAAAqIwggKeBgkqhkiG9w0BBwagggKPMIICiwIBADCCAoQGCSqGSIb3DQEHATAeBglghkgBZQMEAS4wEQQMkeDyBfSEK7uSgab7AgEQgIICVQkqXycVfUWoNG2DNXi14K5iNkDjdcca-4ZKbjKnNb-uF_Eo6UipCvYobfyhp06bpJNfxUxaLJvKMWwhjD1if9YXj3duaPA3L4x9IvnBDR-1VwCWNSc-KkHYdBNkyJwm42Uy7OtnGUEtsVSXVc-3T77RaUilN_5RwgXcfwsrwG8qcpeb8TgJfUgUTxPdV…	Yamane et al., 1982	0.01	0.1
437	Brassica oleracea	Brassica oleracea L.	Wild	Angiosperm	Brassicaceae	Dicot	Tricellular	Dry	NA	Roberts	1983	1	https://link.springer.com/content/pdf/10.1007/BF00308074.pdf	Roberts et al., 1983	0	0.003	0.17								1.66 (6H2O)					0.99
438	Crotalaria retusa	Crotalaria retusa L.	Cultivated	Angiosperm	Fabaceae	Dicot	Bicellular	Wet	NA	Sharma	1983	1	https://academic.oup.com/aob/article/52/2/165/129971	Sharma & Shivanna, 1983		0.1	1.62			1.28 (4H2O)
439	Phoenix dactylifera L.	Phoenix dactylifera L.	Cultivated	Angiosperm	Arecaceae	Monocot	Bicellular	Dry	NA	Tisserat	1983	0	https://acsess.onlinelibrary.wiley.com/doi/abs/10.2135/cropsci1983.0011183X002300020017x	Tisserat et al., 1983		0.15
440	Gossypium hirsutum L.	Gossypium hirsutum L.	Cultivated	Angiosperm	Malvaceae	Dicot	Bicellular	Dry	Starchy	Barrow	1983	1	https://pdfs.semanticscholar.org/b457/0705218cbed0d369a1463a54f84013fe204a.pdf	Barrow, 1983	?
441	Gossypium hirsutum L.	Gossypium hirsutum L.	Cultivated	Angiosperm	Malvaceae	Dicot	Bicellular	Dry	Starchy	Barrow	1983	1	https://pdfs.semanticscholar.org/b457/0705218cbed0d369a1463a54f84013fe204a.pdf	Barrow, 1983	0
442	Lactuca sativa	Lactuca sativa L.	Cultivated	Angiosperm	Asteraceae	Dicot	Tricellular	Dry	NA	Eenink	1983	1	https://link.springer.com/content/pdf/10.1007/BF00021464.pdf	Eenink, 1983	0	0.4	1.62			0.5 (4H2O)
443	Prunus dulcis	Prunus dulcis (Mill.) D.A.Webb	Cultivated	Angiosperm	Rosaceae	Dicot	Bicellular	Wet	Starchy and starchless	Klungness	1983	0	https://www.tandfonline.com/doi/abs/10.1080/00221589.1983.11515114	Klungness et al., 1983	0.02	0.1
444	Camellia sinensis	Camellia sinensis (L.) Kuntze	Wild	Angiosperm	Theaceae	Dicot	Bicellular	Wet	Starchless	Konishi	1983	1	https://academic.oup.com/pcp/article/24/5/857/1871670	Konishi & Miyamoto, 1983	0.012	0.08	0.28
445	Lilium longiflorum	Lilium longiflorum Thunb.	Wild	Angiosperm	Liliaceae	Monocot	Bicellular	Wet	Starchless	Hong	1983	1	https://onlinelibrary.wiley.com/doi/epdf/10.1111/1365-3040.ep11588117	Hong-Qi & Croes, 1983		0.099	0.16			1.27										0.99
446	Cyamopsis tetragonoloba	Cyamopsis tetragonoloba (L.)Taub.	Cultivated	Angiosperm	Fabaceae	Dicot	Bicellular	Wet	NA	Kandasamy	1983	1	https://www.sciencedirect.com/science/article/pii/030442118390041X?via%3Dihub	Kandasamy & Vivekanandan, 1983		0.25	1.62			1.83
447	Primula vulgaris	Primula vulgaris Huds.	Wild	Angiosperm	Primulaceae	Dicot	Bicellular	Dry	Starchless	Shivanna	1983	1	https://link.springer.com/content/pdf/10.1007/BF01281821.pdf	Shivanna & Heslop-Harrison, 1983	0	0.15	2			2
448	Pyrus communis L.	Pyrus communis L.	Cultivated	Angiosperm	Rosaceae	Dicot	Bicellular	Wet	Starchy and starchless	Polito	1983	1	https://link.springer.com/content/pdf/10.1007/BF01281826.pdf	Polito, 1983		0.068	0.4			1																													0.1 McIlvaine
449	Typha latifolia L.	Typha latifolia L.	Wild	Angiosperm	Typhaceae	Monocot	Bicellular	Dry	Starchy	Hoekstra	1984	1	http://www.plantphysiol.org/content/plantphysiol/74/4/815.full.pdf	Hoekstra, 1984		0.068	1.6			1.3 (4H2O)						0.8 (7H2O)				1																			4 Na-Citrate
450	Zea mays L.	Zea mays L.	Cultivated	Angiosperm	Poaceae	Monocot	Tricellular	Dry	NA	Lin	1984	1	http://www.plantphysiol.org/content/plantphysiol/74/3/746.full.pdf	Lin & Dickinson, 1984	1% (Difco Bacto agar)	0.15	0.17			1.28 (4H2O)										0.99
451	Narcissus pseudonarcissus L.	Narcissus pseudonarcissus L.	Cultivated	Angiosperm	Amaryllidaceae	Monocot	Bicellular	Dry	Starchless	Heslopharrison	1984	1	https://link.springer.com/content/pdf/10.1007/BF00272876.pdf	Heslop-Harrison et al., 1984	0	0.154	2			3
452	Helleborus niger L.	Helleborus niger L.	Wild	Angiosperm	Ranunculaceae	Dicot	Bicellular	Dry	Starchy and starchless	Heslopharrison	1984	1	https://link.springer.com/content/pdf/10.1007/BF00272876.pdf	Heslop-Harrison et al., 1984	0	0.154	2			3
453	Primula vulgaris L.	Primula vulgaris Huds.	Wild	Angiosperm	Primulaceae	Dicot	Bicellular	Dry	Starchless	Heslopharrison	1984	1	https://link.springer.com/content/pdf/10.1007/BF00272876.pdf	Heslop-Harrison et al., 1984	0	0.154	2			3
454	Lycopersicon esculentum Mill.	Lycopersicon esculentum Mill.	Cultivated	Angiosperm	Solanaceae	Dicot	Bicellular	Wet	Starchy and starchless	Heslopharrison	1984	1	https://link.springer.com/content/pdf/10.1007/BF00272876.pdf	Heslop-Harrison et al., 1984	0.01	0.12	1			1
455	Medicago sativa L.	Medicago sativa L.	Cultivated	Angiosperm	Fabaceae	Dicot	Bicellular	Wet	NA	Heslopharrison	1984	1	https://link.springer.com/content/pdf/10.1007/BF00272876.pdf	Heslop-Harrison et al., 1984	0.01	0.15	1			1
456	Petunia hybrida L.	Petunia hybrida Vilm.	Cultivated	Angiosperm	Solanaceae	Dicot	Bicellular	Wet	Starchy and starchless	Kamboj	1984		https://academic.oup.com/aob/article/54/5/647/144885	Kamboj et al., 1984	0	0.1	1.62
457	Anacardium occidentale L.	Anacardium occidentale L.	Cultivated	Angiosperm	Anacardiaceae	Dicot	Bicellular	Wet	Starchy and starchless	Subbaiah	1984	1	https://www.researchgate.net/publication/237162297_A_polyethylene_glycol_based_medium_for_in_vitro_germination_of_cashew_pollen	Subbaiah, 1984	?	0.2		1.85	0.5
458	Gossypium hirsutum L.	Gossypium hirsutum L.	Cultivated	Angiosperm	Malvaceae	Dicot	Bicellular	Dry	Starchy	Philomena	1984	1	https://www.researchgate.net/publication/288839394_Rapid_germination_of_cotton_and_okra_pollen	Philomena & David, 1984	3%(bacto-agar)	0.25	6.47			2.44								4.64
459	Gossypium hirsutum L.	Gossypium hirsutum L.	Cultivated	Angiosperm	Malvaceae	Dicot	Bicellular	Dry	Starchy	Philomena	1984	1	https://www.researchgate.net/publication/288839394_Rapid_germination_of_cotton_and_okra_pollen	Philomena & David, 1984	0	0.25	6.47			2.44								4.64
460	Abelmoschus esculentus	Abelmoschus esculentus (L.) Moench	Cultivated	Angiosperm	Malvaceae	Dicot	Bicellular	Dry	Starchy	Philomena	1984	1	https://www.researchgate.net/publication/288839394_Rapid_germination_of_cotton_and_okra_pollen	Philomena & David, 1984	3%(bacto-agar)	0.25	6.47			2.44								4.64
461	Abelmoschus esculentus	Abelmoschus esculentus (L.) Moench	Cultivated	Angiosperm	Malvaceae	Dicot	Bicellular	Dry	Starchy	Philomena	1984	1	https://www.researchgate.net/publication/288839394_Rapid_germination_of_cotton_and_okra_pollen	Philomena & David, 1984	0	0.25	6.47			2.44								4.64
462	Picea pungens	Picea pungens Engelm.	Cultivated	Gymnosperm	Pinaceae				NA	Cram	1984	1	https://pubs.cif-ifc.org/doi/pdf/10.5558/tfc60093-2	Cram & Lindquist, 1984	0.015	0.1
463	Persea americana	Persea americana Mill.	Cultivated	Angiosperm	Lauraceae	Dicot	Bicellular	Dry	NA	Sahar	1984	1	http://www.avocadosource.com/Journals/HortScience/HortSci_1984_19_PG_886-888.pdf	Sahar & Spiegel-Roy, 1984	0	0.15	1.62			5.5 (H2O)						2.5				0.99
464	Persea americana	Persea americana Mill.	Cultivated	Angiosperm	Lauraceae	Dicot	Bicellular	Dry	NA	Sahar	1984	1	http://www.avocadosource.com/Journals/HortScience/HortSci_1984_19_PG_886-888.pdf	Sahar & Spiegel-Roy, 1984	0.01	0.15	1.62			5.5 (H2O)						2.5				0.99
465	Juglans regia L.	Juglans regia L.	Cultivated	Angiosperm	Juglandaceae	Dicot	Bicellular	Dry	Starchless	Luza	1985	1	https://www.sciencedirect.com/science/article/pii/0304423885900354?via%3Dihub	Luza & Polito, 1985	0.0065	0.2	0.16								1
466	Beta vulgaris L.	Beta vulgaris L.	Cultivated	Angiosperm	Amaranthaceae	Dicot	Tricellular	Dry	NA	Smith	1985	1	https://link.springer.com/content/pdf/10.1007/BF00252060.pdf	Smith & Moser, 1985	0	0.32
467	Eucalyptus rhodantha	Eucalyptus rhodantha Blakely & H.Steedman	Cultivated	Angiosperm	Myrtaceae	Dicot	Bicellular	Dry	Starchless	Heslopharrison	1985	1	https://jcs.biologists.org/content/joces/73/1/135.full.pdf	Heslop-Harrison & Heslop-Harrison, 1985	0	0.2	1			1
468	Eucalyptus rhodantha	Eucalyptus rhodantha Blakely & H.Steedman	Cultivated	Angiosperm	Myrtaceae	Dicot	Bicellular	Dry	Starchless	Heslopharrison	1985	1	https://jcs.biologists.org/content/joces/73/1/135.full.pdf	Heslop-Harrison & Heslop-Harrison, 1985	0.5 %	0.2	1			1
469	Lilium longiflorum	Lilium longiflorum Thunb.	Wild	Angiosperm	Liliaceae	Monocot	Bicellular	Wet	Starchless	Yang	1985	1	http://natuurtijdschriften.nl/download?type=document&docid=540543	Yang et al., 1985			1.62
470	Malus domestica	Malus domestica Borkh.	Cultivated	Angiosperm	Rosaceae	Dicot	Bicellular	Wet	Starchy and starchless	Tagliasacchi	1985	1	https://academic.oup.com/aob/article/56/1/29/110845	Tagliasacchi et al., 1985		0.1	1.62			0.19 (4H2O)
471	Pinus contorta	Pinus contorta Douglas ex Loudon	Wild	Gymnosperm	Pinaceae				NA	Pettitt	1985	1	https://academic.oup.com/aob/article/56/3/379/165870	Pettitt, 1985	0.01	0.1	1								1
472	Picea sitchensis	Picea sitchensis (Bong.) Carrière	Wild	Gymnosperm	Pinaceae				NA	Pettitt	1985	1	https://academic.oup.com/aob/article/56/3/379/165870	Pettitt, 1986	0.01	0.1	1								1
473	Pinus nigra	Pinus nigra J.F.Arnold	Wild	Gymnosperm	Pinaceae				NA	Pettitt	1985	1	https://academic.oup.com/aob/article/56/3/379/165870	Pettitt, 1987	0.01	0.1	1								1
474	Abies alba	Abies alba Mill.	Wild	Gymnosperm	Pinaceae				NA	Pettitt	1985	1	https://academic.oup.com/aob/article/56/3/379/165870	Pettitt, 1988	0.01	0.1	1								1
475	Cedrus deodara	Cedrus deodara (Roxb. ex D.Don) G.Don	Wild	Gymnosperm	Pinaceae				NA	Pettitt	1985	1	https://academic.oup.com/aob/article/56/3/379/165870	Pettitt, 1989	0.01	0.1	1								1
476	Simmondsia chinensis	Simmondsia chinensis (Link) C.K. Schneid.	Cultivated	Angiosperm	Simmondsiaceae	Dicot	NA	NA	NA	Lee	1985	1	https://www.researchgate.net/publication/260794617_Factors_affecting_in_vitro_germination_and_storage_of_Simmondsia_chinensis_pollen	Lee et al., 1985	4% (Difco Bacto agar)	0.2	0.17								2.05 (2H2O)					0.99
477	Lycopersicon esculentum	Lycopersicon esculentum Mill.	Cultivated	Angiosperm	Solanaceae	Dicot	Bicellular	Wet	Starchy and starchless	Trabelsi	1985	0	http://apps.webofknowledge.com/full_record.do?product=UA&search_mode=GeneralSearch&qid=2&SID=F4Q2Ud4qors3LlhHVPj&page=2&doc=55&cacheurlFromRightClick=no	Trabelsi, 1985	0.01	0.11	1.78
478	Petunia hybrida	Petunia hybrida Vilm.	Cultivated	Angiosperm	Solanaceae	Dicot	Bicellular	Wet	Starchy and starchless	Shivanna	1985	1	https://www.sciencedirect.com/science/article/pii/0739626085900486	Shivanna & SHARMA, 1985		0.2	3.24																																15 PO₄³⁻
479	Lilium longiflorum	Lilium longiflorum Thunb.	Wild	Angiosperm	Liliaceae	Monocot	Bicellular	Wet	Starchless	Leung	1985	1	https://reader.elsevier.com/reader/sd/pii/0168945285901906?token=65835538563E1C9EF364A74D14BCAF806CB577FE81C9FA74E09892087D3E35E35A2B67A8132749A0173A69BAA39BF88E	Leung & Loewus, 1985
480	Endymion non-scriptus (L.) Garcke	Hyacinthoides non-scripta (L.) Chouard ex Rothm.	Wild	Angiosperm	Asparagaceae	Monocot	Bicellular	Dry	NA	Heslopharrison	1986	1	https://jcs.biologists.org/content/joces/86/1/1.full.pdf	Heslop-harrison et al., 1986	0	0.15	0.5			1
481	Crocus sativus L.	Crocus sativus L.	Cultivated	Angiosperm	Iridaceae	Monocot	Bicellular	Dry	Starchless	Chichiricco	1986	1	https://www.researchgate.net/publication/237162991_Crocus_sativus_pollen_germination_and_pollen_tube_growth_in_vitro_and_after_intraspecific_and_interspecific_pollination	Chichiricco & Caiola, 1986	0	0.1	1.62
482	Nicotiana tabacum	Nicotiana tabacum L.	Cultivated	Angiosperm	Solanaceae	Dicot	Bicellular	Wet	Starchy and starchless	Cresti	1986	1	http://natuurtijdschriften.nl/download?type=document&docid=540608	Cresti et al., 1986	0
483	Nicotiana tabacum	Nicotiana tabacum L.	Cultivated	Angiosperm	Solanaceae	Dicot	Bicellular	Wet	Starchy and starchless	Cresti	1986	1	http://natuurtijdschriften.nl/download?type=document&docid=540608	Cresti et al., 1986	0
484	Helleborus foetidus	Helleborus foetidus L.	Wild	Angiosperm	Ranunculaceae	Dicot	Bicellular	Dry	Starchy and starchless	Heslopharrison	1986	1	https://academic.oup.com/aob/article/58/1/1/174429	Heslop-harrison et al., 1986	0	0.15	1			1
485	Populus deltoides	Populus deltoides Marshall	Wild	Angiosperm	Salicaceae	Dicot	Bicellular	Dry	Starchless	Rajora	1986	1	https://www.academia.edu/22859395/Pollen_viability_of_some_Populus_species_as_indicated_by_in_vitro_pollen_germination_and_tetrazolium_chloride_staining	Rajam, 1989	0.6% (Difco Bacto agar)	0.1
486	Populus maximowiczii Henry	Populus suaveolens Fisch. ex Loudon	Wild	Angiosperm	Salicaceae	Dicot	Bicellular	Dry	Starchless	Rajora	1986	1	https://www.academia.edu/22859395/Pollen_viability_of_some_Populus_species_as_indicated_by_in_vitro_pollen_germination_and_tetrazolium_chloride_staining	Rajam, 1989	0.6% (Difco Bacto agar)	0.2
487	Populus nigra	Populus nigra L.	Wild	Angiosperm	Salicaceae	Dicot	Bicellular	Dry	Starchless	Rajora	1986	1	https://www.academia.edu/22859395/Pollen_viability_of_some_Populus_species_as_indicated_by_in_vitro_pollen_germination_and_tetrazolium_chloride_staining	Rajam, 1989	0.6% (Difco Bacto agar)	0.1
488	Cornus florida L.	Cornus florida L.	Wild	Angiosperm	Cornaceae	Dicot	Bicellular	Dry	Starchy	Van Ryn	1986	1	https://www.researchgate.net/publication/237868450_Effects_of_acidity_on_invitro_pollen_germination_and_tube_elongation_in_four_hardwood_species	van Ryn et al., 1986	0	0.005	1.62			1.53						1.66				0.99
489	Betula lenta L.	Betula lenta L.	Wild	Angiosperm	Betulaceae	Dicot	Bicellular	Dry	Starchy and starchless	Van Ryn	1986	1	https://www.researchgate.net/publication/237868450_Effects_of_acidity_on_invitro_pollen_germination_and_tube_elongation_in_four_hardwood_species	van Ryn et al., 1986	0	0.025	1.62			3.05						1.66				0.99
490	Betula alleghaniensis Britton	Betula alleghaniensis Britton	Wild	Angiosperm	Betulaceae	Dicot	Bicellular	Dry	Starchy and starchless	Van Ryn	1986	1	https://www.researchgate.net/publication/237868450_Effects_of_acidity_on_invitro_pollen_germination_and_tube_elongation_in_four_hardwood_species	van Ryn et al., 1986	0	0.005	1.62			1.53						1.66				0.99
491	Acer saccharum Marsh.	Acer saccharum Marshall	Wild	Angiosperm	Sapindaceae	Dicot	Bicellular	Wet	NA	Van Ryn	1986	1	https://www.researchgate.net/publication/237868450_Effects_of_acidity_on_invitro_pollen_germination_and_tube_elongation_in_four_hardwood_species	van Ryn et al., 1986	0	0.125	1.62			1.53						1.66				0.99
492	Phoenix dactylifera L.	Phoenix dactylifera L.	Cultivated	Angiosperm	Arecaceae	Monocot	Bicellular	Dry	NA	Nasr	1986	1	https://www.iraqi-datepalms.net/assets/uploads/2018/10/Book8.pdf#page=35	Mater, 1986	0.01	0.1		46.2
493	Podocarpus nagi (Thunb.) Pilg.	Nageia nagi (Thunb.) Kuntze	Wild	Gymnosperm	Podocarpaceae				NA	Saito	1986	0	https://www.jstage.jst.go.jp/article/jjfs1953/68/4/68_4_158/_article/-char/ja/	Saito et al., 1968	0.01	0.1
494	Torreya nucifera	Torreya nucifera (L.) Siebold & Zucc.	Cultivated	Gymnosperm	Taxaceae				NA	Saito	1986	0	https://www.jstage.jst.go.jp/article/jjfs1953/68/4/68_4_158/_article/-char/ja/	Saito et al., 1968	0.01	0.1
495	Antirrhinum majus	Antirrhinum majus L.	Wild	Angiosperm	Plantaginaceae	Dicot	Bicellular	Dry	Starchy	Yang	1986	1	https://reader.elsevier.com/reader/sd/pii/016894528690169X?token=C3D8584495B269A9E7699C8F2A78D843DAB1388C1D3E9FDD411856F0E78DAD4FFE4A6BA13E6533314D6D9E0B30E77A26	Yang, 1986	0	0.1	1.62								1.37 (2H2O)	1.67				0.99
496	Nicotiana tabacum	Nicotiana tabacum L.	Cultivated	Angiosperm	Solanaceae	Dicot	Bicellular	Wet	Starchy and starchless	Yang	1986	1	https://reader.elsevier.com/reader/sd/pii/016894528690169X?token=C3D8584495B269A9E7699C8F2A78D843DAB1388C1D3E9FDD411856F0E78DAD4FFE4A6BA13E6533314D6D9E0B30E77A26	Yang, 1986	0	0.1	1.62								1.37 (2H2O)	1.67				0.99
497	Juglans regia	Juglans regia L.	Cultivated	Angiosperm	Juglandaceae	Dicot	Bicellular	Dry	Starchless	Parihar	1986	0	http://apps.webofknowledge.com/full_record.do?product=UA&search_mode=GeneralSearch&qid=2&SID=F4Q2Ud4qors3LlhHVPj&page=1&doc=26&cacheurlFromRightClick=no	Park et al., 1999	0.01	0.09
498	Lycopersicon peruvianum (L.) Mill. × Lycopersicon esculentum Mill.	Lycopersicon peruvianum (L.) Mill. × Lycopersicon esculentum Mill.	Cultivated	Angiosperm	Solanaceae	Dicot	Bicellular	Wet	Starchy and starchless	Bino	1987	1	https://link.springer.com/content/pdf/10.1007/BF00269553.pdf	Bino et al., 1987	0.007	0.1	3			1.7
499	Juglans regia	Juglans regia L.	Cultivated	Angiosperm	Juglandaceae	Dicot	Bicellular	Dry	Starchless	Luza	1987	1	https://onlinelibrary.wiley.com/doi/epdf/10.1111/j.1365-3040.1987.tb01826.x	Luza & Polito, 1987	0.0065	0.2	1.62								1
500	Juglans nigra	Juglans nigra L.	Cultivated	Angiosperm	Juglandaceae	Dicot	Bicellular	Dry	Starchless	Luza	1987	1	https://onlinelibrary.wiley.com/doi/epdf/10.1111/j.1365-3040.1987.tb01826.x	Luza & Polito, 1987
501	Nicotiana sylvestris	Nicotiana sylvestris Speg. & S. Comes	Cultivated	Angiosperm	Solanaceae	Dicot	Bicellular	Wet	Starchy and starchless	Kappler	1987	1	https://reader.elsevier.com/reader/sd/pii/0098847287900402?token=9D18C7CADD44C21817AD195E55834F48ADD7D16FC40B437B18247003999FF69FFE1AB256D97005DE7685817CC91FFF76	Kappler & Kristen, 1987	0	0.1	1.62			3 (H2O)																													10 MES
502	Zea mays L.	Zea mays L.	Cultivated	Angiosperm	Poaceae	Monocot	Tricellular	Dry	NA	Waldron	1987	1	https://reader.elsevier.com/reader/sd/pii/0098847287900426?token=3CA826D6C55AD182102CF7544D34AEC62A9B295722D9A8386A02445966433983E11B8236784E7EEDD7F4CEFA8C219BE7	Waldron & Craker, 1987	0.007	0.171	1.62			1.27
503	Phoenix dactylifera L.	Phoenix dactylifera L.	Cultivated	Angiosperm	Arecaceae	Monocot	Bicellular	Dry	NA	Boughediri	1987	1	https://www.iraqi-datepalms.net/assets/uploads/2018/10/Book10.pdf#page=9	Boughediri & Bounaga, 1987	0.01	10% (glucose)
504	Phoenix dactylifera L.	Phoenix dactylifera L.	Cultivated	Angiosperm	Arecaceae	Monocot	Bicellular	Dry	NA	Boughediri	1987	1	https://www.iraqi-datepalms.net/assets/uploads/2018/10/Book10.pdf#page=9	Boughediri & Bounaga, 1987	0	0.015	1.62			0.37						0.34				197.82
505	Phoenix dactylifera L.	Phoenix dactylifera L.	Cultivated	Angiosperm	Arecaceae	Monocot	Bicellular	Dry	NA	Boughediri	1987	1	https://www.iraqi-datepalms.net/assets/uploads/2018/10/Book10.pdf#page=9	Boughediri & Bounaga, 1987	0.01	0.015	1.62			0.37						0.34				197.82
506	Moghania chappar (Benth.) Kuntze	Flemingia chappar Benth.	Wild	Angiosperm	Fabaceae	Dicot	Bicellular	Wet	NA	Srivastava	1987	0	http://apps.webofknowledge.com/full_record.do?product=UA&search_mode=GeneralSearch&qid=2&SID=D5LvUajpAyJanxeFUTH&page=3&doc=26&cacheurlFromRightClick=no	Srivastava et al., 1987	0.01	0.75
507	Campsis grandiflora	Campsis grandiflora (Thunb.) K.Schum.	Wild	Angiosperm	Bignoniaceae	Dicot	Bicellular	Wet	Starchy and starchless	Chauhan	1987	1	https://academic.oup.com/jxb/article/38/1/173/617206	Chauhan et al., 1987	0	0.1	1.62			1.27						0.81				0.99
508	Crescentia cujete	Crescentia cujete L.	Cultivated	Angiosperm	Bignoniaceae	Dicot	Bicellular	Wet	Starchy and starchless	Chauhan	1987	1	https://academic.oup.com/jxb/article/38/1/173/617206	Chauhan et al., 1987	0	0.1	1.62			1.27						0.81				0.99
509	Millingtonia hortensis	Millingtonia hortensis L.f.	Cultivated	Angiosperm	Bignoniaceae	Dicot	Bicellular	Wet	Starchy and starchless	Chauhan	1987	1	https://academic.oup.com/jxb/article/38/1/173/617206	Chauhan et al., 1987	0	0.1	1.62			1.27						0.81				0.99
510	Pyrostegia venusta	Pyrostegia venusta (Ker Gawl.) Miers	Cultivated	Angiosperm	Bignoniaceae	Dicot	Bicellular	Wet	Starchy and starchless	Chauhan	1987	1	https://academic.oup.com/jxb/article/38/1/173/617206	Chauhan et al., 1987	0	0.1	1.62			1.27						0.81				0.99
511	Spathodea campanulata	Spathodea campanulata P.Beauv.	Cultivated	Angiosperm	Bignoniaceae	Dicot	Bicellular	Wet	Starchy and starchless	Chauhan	1987	1	https://academic.oup.com/jxb/article/38/1/173/617206	Chauhan et al., 1987	0	0.1	1.62			1.27						0.81				0.99
512	Rosa rugosa	Rosa rugosa Thunb.	Cultivated	Angiosperm	Rosaceae	Dicot	Bicellular	Dry	Starchy and starchless	Khan	1987	0	http://apps.webofknowledge.com/full_record.do?product=UA&search_mode=GeneralSearch&qid=2&SID=D5LvUajpAyJanxeFUTH&page=4&doc=32&cacheurlFromRightClick=no	Khan, 1987	0.01	0.3
513	Asclepias syriaca	Asclepias syriaca L.	Wild	Angiosperm	Apocynaceae	Dicot	Tricellular	Dry	Starchless	Eisikowitch	1987	1	https://www.researchgate.net/publication/261911586_The_Significance_of_Pollen_Longevity_in_Asclepias_Syriaca_L_Under_Natural_Conditions	Eisikowitch et al., 1987	?	10% (glucose)
514	Nicotiana tabacum	Nicotiana tabacum L.	Cultivated	Angiosperm	Solanaceae	Dicot	Bicellular	Wet	Starchy and starchless	Hoffmann	1988	1	https://link.springer.com/content/pdf/10.1007/BF00272752.pdf	Hoffmann et al., 1988	0	10 %	1.62
515	Papaver dubium L.	Papaver dubium L.	Wild	Angiosperm	Papaveraceae	Dicot	Bicellular	Dry	Starchless	Hoekstra	1988	1	http://www.plantphysiol.org/content/plantphysiol/88/3/626.full.pdf	Hoekstra & van Roekel, 1988	0.006	0.103	1.6			1.3 (4H2O)						0.8 (7H2O)				1																			2 Na- PO₄³⁻ citrate
516	Lilium longiflorum	Lilium longiflorum Thunb.	Wild	Angiosperm	Liliaceae	Monocot	Bicellular	Wet	Starchless	Xiong	1988	1	https://www.tandfonline.com/doi/pdf/10.1080/00021369.1988.10868777	Xiong et al., 1988	0.01	10 %	1								1
517	Olea europaea L.	Olea europaea L.	Cultivated	Angiosperm	Oleaceae	Dicot	Bicellular	Dry	NA	Rodriguez rosales	1988	1	https://nph.onlinelibrary.wiley.com/doi/epdf/10.1111/j.1469-8137.1988.tb04194.x	Rodriguez-Rosales & Donaire, 1988		10 %	1.62							0.2							2
518	Catharanthus roseus	Catharanthus roseus (L.) G.Don	Cultivated	Angiosperm	Apocynaceae	Dicot	Bicellular	Dry and wet	Starchless	Prakash	1988	1	https://academic.oup.com/aob/article/61/3/373/146249	Prakash et al., 1988	0	0.1	1.62			1.27						0.81				0.99
519	Arabidopsis thaliana	Arabidopsis thaliana (L.) Heynh.	Cultivated	Angiosperm	Brassicaceae	Dicot	Tricellular	Dry	NA	Pickert	1988	1	https://www.arabidopsis.org/ais/1988/picke-1988-aadeg.html	Pickert, 1988	0.01	20%, 0.001% (glucose)	1.3
520	Pinus kesiya	Pinus kesiya Royle ex Gordon	Wild	Gymnosperm	Pinaceae				NA	Katiyar	1988	0	http://apps.webofknowledge.com/full_record.do?product=UA&search_mode=GeneralSearch&qid=5&SID=D5LvUajpAyJanxeFUTH&page=3&doc=22&cacheurlFromRightClick=no	Katiyar, 1988		0		0.47
521	Petunia hybrida	Petunia hybrida Vilm.	Cultivated	Angiosperm	Solanaceae	Dicot	Bicellular	Wet	Starchy and starchless	Mulcahy	1988	1	https://reader.elsevier.com/reader/sd/pii/0168945288900635?token=601B0273871F8FA3DE70A6A79952712124F0A13CC211FD5EAB8E7833DE070EA51CC0B2CA2FE3E7D7438449C962726995	Bergamini Mulcahy & Mulcahy, 1988		0.103	1.62			1.27
522	Zea mays L.	Zea mays L.	Cultivated	Angiosperm	Poaceae	Monocot	Tricellular	Dry	NA	Mulcahy	1988	1	https://reader.elsevier.com/reader/sd/pii/0168945288900635?token=601B0273871F8FA3DE70A6A79952712124F0A13CC211FD5EAB8E7833DE070EA51CC0B2CA2FE3E7D7438449C962726995	Bergamini Mulcahy & Mulcahy, 1988		0.151	1.62			1.27
523	Silene dioica	Silene dioica (L.) Clairv.	Wild	Angiosperm	Caryophyllaceae	Dicot	Tricellular	Dry	Starchless	Mulcahy	1988	1	https://reader.elsevier.com/reader/sd/pii/0168945288900635?token=601B0273871F8FA3DE70A6A79952712124F0A13CC211FD5EAB8E7833DE070EA51CC0B2CA2FE3E7D7438449C962726995	Bergamini Mulcahy & Mulcahy, 1988		0.137	1.62			1.27
524	Brassica campestris L.	Brassica rapa L.	Wild	Angiosperm	Brassicaceae	Dicot	Tricellular	Dry	NA	Mulcahy	1988	1	https://reader.elsevier.com/reader/sd/pii/0168945288900635?token=601B0273871F8FA3DE70A6A79952712124F0A13CC211FD5EAB8E7833DE070EA51CC0B2CA2FE3E7D7438449C962726995	Bergamini Mulcahy & Mulcahy, 1988		0.205	1.62			1.27
525	Juglans regia	Juglans regia L.	Cultivated	Angiosperm	Juglandaceae	Dicot	Bicellular	Dry	Starchless	Samushia	1988	0	http://apps.webofknowledge.com/full_record.do?product=UA&search_mode=GeneralSearch&qid=5&SID=D5LvUajpAyJanxeFUTH&page=3&doc=29&cacheurlFromRightClick=no	Samushia et al., 1988	0.01	0.2
526	Carica papaya	Carica papaya L.	Cultivated	Angiosperm	Caricaceae	Dicot	Bicellular	Dry	NA	Cohen	1989	1	https://reader.elsevier.com/reader/sd/pii/0304423889901052?token=1561DD72730499F5B0D947D0C2687CDC504041EAAF400A0BF2A59D7F4E812893905358FB9196178842AF68DCEA6B7273	Cohen et al., 1989	0.015	0.05	1.62			1.22						1.67				0.99
527	Solanum melongena	Solanum melongena L.	Cultivated	Angiosperm	Solanaceae	Dicot	Bicellular	Wet	Starchy and starchless	Alexander	1989	1	https://www.tandfonline.com/doi/abs/10.3109/10520298909107005#aHR0cHM6Ly93d3cudGFuZGZvbmxpbmUuY29tL2RvaS9wZGYvMTAuMzEwOS8xMDUyMDI5ODkwOTEwNzAwNT9uZWVkQWNjZXNzPXRydWVAQEAw	Alexander & Ganeshan, 1989		0.15	1.62			1.83						1.66				0.99
528	Capsicum annum	Capsicum annuum L.	Cultivated	Angiosperm	Solanaceae	Dicot	Bicellular	Wet	Starchy and starchless	Alexander	1989	1	https://www.tandfonline.com/doi/abs/10.3109/10520298909107005#aHR0cHM6Ly93d3cudGFuZGZvbmxpbmUuY29tL2RvaS9wZGYvMTAuMzEwOS8xMDUyMDI5ODkwOTEwNzAwNT9uZWVkQWNjZXNzPXRydWVAQEAw	Alexander & Ganeshan, 1989		0.15	1.62			1.83						1.66				0.99
529	Vigna unguiculata	Vigna unguiculata	Cultivated	Angiosperm	Fabaceae	Dicot	Bicellular	Wet	NA	Alexander	1989	1	https://www.tandfonline.com/doi/abs/10.3109/10520298909107005#aHR0cHM6Ly93d3cudGFuZGZvbmxpbmUuY29tL2RvaS9wZGYvMTAuMzEwOS8xMDUyMDI5ODkwOTEwNzAwNT9uZWVkQWNjZXNzPXRydWVAQEAw	Alexander & Ganeshan, 1989		0.15	1.62			1.83						1.66				0.99
530	Cyamposis tetragonoloba	Cyamopsis tetragonoloba (L.)Taub.	Cultivated	Angiosperm	Fabaceae	Dicot	Bicellular	Wet	NA	Alexander	1989	1	https://www.tandfonline.com/doi/abs/10.3109/10520298909107005#aHR0cHM6Ly93d3cudGFuZGZvbmxpbmUuY29tL2RvaS9wZGYvMTAuMzEwOS8xMDUyMDI5ODkwOTEwNzAwNT9uZWVkQWNjZXNzPXRydWVAQEAw	Alexander & Ganeshan, 1989		0.15	1.62			1.83						1.66				0.99
531	Mangifera indica	Mangifera indica L.	Cultivated	Angiosperm	Anacardiaceae	Dicot	Bicellular	Wet	Starchy and starchless	Alexander	1989	1	https://www.tandfonline.com/doi/abs/10.3109/10520298909107005#aHR0cHM6Ly93d3cudGFuZGZvbmxpbmUuY29tL2RvaS9wZGYvMTAuMzEwOS8xMDUyMDI5ODkwOTEwNzAwNT9uZWVkQWNjZXNzPXRydWVAQEAw	Alexander & Ganeshan, 1989		0.15	1.62			1.83						1.66				0.99
532	Psophocarpus tetragonolobus	Psophocarpus tetragonolobus (L.)DC.	Cultivated	Angiosperm	Fabaceae	Dicot	Bicellular	Wet	NA	Alexander	1989	1	https://www.tandfonline.com/doi/abs/10.3109/10520298909107005#aHR0cHM6Ly93d3cudGFuZGZvbmxpbmUuY29tL2RvaS9wZGYvMTAuMzEwOS8xMDUyMDI5ODkwOTEwNzAwNT9uZWVkQWNjZXNzPXRydWVAQEAw	Alexander & Ganeshan, 1989		0.15	1.62			1.83						1.66				0.99
533	Dolichos lablab L.	Lablab purpureus (L.) Sweet	Cultivated	Angiosperm	Fabaceae	Dicot	Bicellular	Wet	NA	Alexander	1989	1	https://www.tandfonline.com/doi/abs/10.3109/10520298909107005#aHR0cHM6Ly93d3cudGFuZGZvbmxpbmUuY29tL2RvaS9wZGYvMTAuMzEwOS8xMDUyMDI5ODkwOTEwNzAwNT9uZWVkQWNjZXNzPXRydWVAQEAw	Alexander & Ganeshan, 1989		0.15	1.62			1.83						1.66				0.99
534	Luffa cylindrica	Luffa cylindrica (L.) M.Roem.	Cultivated	Angiosperm	Cucurbitaceae	Dicot	Bicellular	Dry	Starchy and starchless	Alexander	1989	1	https://www.tandfonline.com/doi/abs/10.3109/10520298909107005#aHR0cHM6Ly93d3cudGFuZGZvbmxpbmUuY29tL2RvaS9wZGYvMTAuMzEwOS8xMDUyMDI5ODkwOTEwNzAwNT9uZWVkQWNjZXNzPXRydWVAQEAw	Alexander & Ganeshan, 1989		0.15	1.62			1.83						1.66				0.99
535	Achras zapota L.	Manilkara zapota (L.) P.Royen	Cultivated	Angiosperm	Sapotaceae	Dicot	NA	Dry	NA	Alexander	1989	1	https://www.tandfonline.com/doi/abs/10.3109/10520298909107005#aHR0cHM6Ly93d3cudGFuZGZvbmxpbmUuY29tL2RvaS9wZGYvMTAuMzEwOS8xMDUyMDI5ODkwOTEwNzAwNT9uZWVkQWNjZXNzPXRydWVAQEAw	Alexander & Ganeshan, 1989		0.15	1.62			1.83						1.66				0.99
536	Hybrid tea rose	Rosa	Cultivated	Angiosperm	Rosaceae	Dicot	Bicellular	Dry	Starchy and starchless	Alexander	1989	1	https://www.tandfonline.com/doi/abs/10.3109/10520298909107005#aHR0cHM6Ly93d3cudGFuZGZvbmxpbmUuY29tL2RvaS9wZGYvMTAuMzEwOS8xMDUyMDI5ODkwOTEwNzAwNT9uZWVkQWNjZXNzPXRydWVAQEAw	Alexander & Ganeshan, 1989		0.15	1.62			1.83						1.66				0.99
537	Lycopersicon esculentum	Lycopersicon esculentum Mill.	Cultivated	Angiosperm	Solanaceae	Dicot	Bicellular	Wet	Starchy and starchless	Alexander	1989	1	https://www.tandfonline.com/doi/abs/10.3109/10520298909107005#aHR0cHM6Ly93d3cudGFuZGZvbmxpbmUuY29tL2RvaS9wZGYvMTAuMzEwOS8xMDUyMDI5ODkwOTEwNzAwNT9uZWVkQWNjZXNzPXRydWVAQEAw	Alexander & Ganeshan, 1989		0.15	1.62			1.83						1.66				0.99
538	Citrus limon	Citrus limon (L.) Osbeck	Cultivated	Angiosperm	Rutaceae	Dicot	Bicellular	Wet	Starchy and starchless	Alexander	1989	1	https://www.tandfonline.com/doi/abs/10.3109/10520298909107005#aHR0cHM6Ly93d3cudGFuZGZvbmxpbmUuY29tL2RvaS9wZGYvMTAuMzEwOS8xMDUyMDI5ODkwOTEwNzAwNT9uZWVkQWNjZXNzPXRydWVAQEAw	Alexander & Ganeshan, 1989		0.15	1.62			1.83						1.66				0.99
539	Punica granatum	Punica granatum L.	Cultivated	Angiosperm	Lythraceae	Dicot	Bicellular	Dry	Starchy and starchless	Alexander	1989	1	https://www.tandfonline.com/doi/abs/10.3109/10520298909107005#aHR0cHM6Ly93d3cudGFuZGZvbmxpbmUuY29tL2RvaS9wZGYvMTAuMzEwOS8xMDUyMDI5ODkwOTEwNzAwNT9uZWVkQWNjZXNzPXRydWVAQEAw	Alexander & Ganeshan, 1989		0.15	1.62			1.83						1.66				0.99
540	Moringa sp.	Moringa sp.	Cultivated	Angiosperm	Moringaceae	Dicot	Bicellular	Dry	NA	Alexander	1989	1	https://www.tandfonline.com/doi/abs/10.3109/10520298909107005#aHR0cHM6Ly93d3cudGFuZGZvbmxpbmUuY29tL2RvaS9wZGYvMTAuMzEwOS8xMDUyMDI5ODkwOTEwNzAwNT9uZWVkQWNjZXNzPXRydWVAQEAw	Alexander & Ganeshan, 1989		0.15	1.62			1.83						1.66				0.99
541	Bougainvillea sp.	Bougainvillea sp.	Cultivated	Angiosperm	Nyctaginaceae	Dicot	Tricellular	Dry	Starchy and starchless	Alexander	1989	1	https://www.tandfonline.com/doi/abs/10.3109/10520298909107005#aHR0cHM6Ly93d3cudGFuZGZvbmxpbmUuY29tL2RvaS9wZGYvMTAuMzEwOS8xMDUyMDI5ODkwOTEwNzAwNT9uZWVkQWNjZXNzPXRydWVAQEAw	Alexander & Ganeshan, 1989		0.15	1.62			1.83						1.66				0.99
542	Jasminum sp.	Jasminum sp.	Cultivated	Angiosperm	Oleaceae	Dicot	Bicellular	Dry	NA	Alexander	1989	1	https://www.tandfonline.com/doi/abs/10.3109/10520298909107005#aHR0cHM6Ly93d3cudGFuZGZvbmxpbmUuY29tL2RvaS9wZGYvMTAuMzEwOS8xMDUyMDI5ODkwOTEwNzAwNT9uZWVkQWNjZXNzPXRydWVAQEAw	Alexander & Ganeshan, 1989		0.15	1.62			1.83						1.66				0.99
543	Impatiens sp.	Impatiens sp.	Wild	Angiosperm	Balsaminaceae	Dicot	Bicellular	Wet	Starchy	Alexander	1989	1	https://www.tandfonline.com/doi/abs/10.3109/10520298909107005#aHR0cHM6Ly93d3cudGFuZGZvbmxpbmUuY29tL2RvaS9wZGYvMTAuMzEwOS8xMDUyMDI5ODkwOTEwNzAwNT9uZWVkQWNjZXNzPXRydWVAQEAw	Alexander & Ganeshan, 1989		0.15	1.62			1.83						1.66				0.99
544	Hippeastrum sp.	Hippeastrum sp.	Cultivated	Angiosperm	Amaryllidaceae	Monocot	Bicellular	Dry	Starchless	Alexander	1989	1	https://www.tandfonline.com/doi/abs/10.3109/10520298909107005#aHR0cHM6Ly93d3cudGFuZGZvbmxpbmUuY29tL2RvaS9wZGYvMTAuMzEwOS8xMDUyMDI5ODkwOTEwNzAwNT9uZWVkQWNjZXNzPXRydWVAQEAw	Alexander & Ganeshan, 1989		0.15	1.62			1.83						1.66				0.99
545	Capsicum annuum	Capsicum annuum L.	Cultivated	Angiosperm	Solanaceae	Dicot	Bicellular	Wet	Starchy and starchless	Kato	1989	1	https://www.jstage.jst.go.jp/article/jjshs1925/58/1/58_1_113/_pdf/-char/en	Kato, 1989	0.015	0.1
546	Nicotiana alata	Nicotiana alata Link & Otto	Wild	Angiosperm	Solanaceae	Dicot	Bicellular	Wet	Starchy and starchless	Jahnen	1989	1	http://www.plantcell.org/content/plantcell/1/5/501.full.pdf	Jahnen et al., 1989		0.02
547	Oryza sativa	Oryza sativa L.	Cultivated	Angiosperm	Poaceae	Monocot	Tricellular	Dry	NA	Kariya	1989	1	https://www.jstage.jst.go.jp/article/jcs1927/58/1/58_1_96/_pdf	Kariya, 1989	0.01	0.1	0.33
548	Actinidia deliciosa	Actinidia deliciosa (A.Chev.) C.F.Liang & A.R.Ferguson	Cultivated	Angiosperm	Actinidiaceae	Dicot	Bicellular	Dry	NA	Watanabe	1989	1	https://www.jstage.jst.go.jp/article/jjshs1925/57/4/57_4_591/_pdf	Watanabe & Takahashi, 1989	0.01	0.1	8.1
549	Citrus maxima	Citrus maxima (Burm.) Merr.	Cultivated	Angiosperm	Rutaceae	Dicot	Bicellular	Wet	Starchy and starchless	Delange	1989	1	https://reader.elsevier.com/reader/sd/pii/S025462991631225X?token=CCC073C2AE654BC0565E9F4B7A252E5A01C92B43BD17EBB4C36F6520444A84F3856ADBE305FACFEBF6BBB7C1C9C515D6	Lange, 1989	?	0.2
550	Zea mays	Zea mays L.	Cultivated	Angiosperm	Poaceae	Monocot	Tricellular	Dry	NA	Pareddy	1989	1	https://link.springer.com/content/pdf/10.1007/BF00274273.pdf	Pareddy et al., 1989	1.5%(DIFCO)	0.12	1.62								2.05 (2H2O)
551	Pinus kesiya	Pinus kesiya Royle ex Gordon	Wild	Gymnosperm	Pinaceae				NA	Katiyar	1989	0	http://apps.webofknowledge.com/full_record.do?product=UA&search_mode=GeneralSearch&qid=2&SID=F1uTn7gEUbHE3FS3ljY&page=3&doc=23&cacheurlFromRightClick=no	Katiyar, 1989	0	0	0.09
552	Eucalyptus globulus	Eucalyptus globulus Labill.	Cultivated	Angiosperm	Myrtaceae	Dicot	Bicellular	Dry	Starchless	Potts	1989	0	https://www.publish.csiro.au/bt/BT9890429	Potts & Marsden-Smedley, 1989		0.2	3.24
553	Eucalyptus morrisbyi	Eucalyptus morrisbyi Brett	Cultivated	Angiosperm	Myrtaceae	Dicot	Bicellular	Dry	Starchless	Potts	1989	0	https://www.publish.csiro.au/bt/BT9890429	Potts & Marsden-Smedley, 1989		0.2	3.24
554	Eucalyptus ovata	Eucalyptus ovata Labill.	Cultivated	Angiosperm	Myrtaceae	Dicot	Bicellular	Dry	Starchless	Potts	1989	0	https://www.publish.csiro.au/bt/BT9890429	Potts & Marsden-Smedley, 1989		0.2	3.24
555	Eucalyptus urnigera Hook.f.	Eucalyptus urnigera Hook.f.	Cultivated	Angiosperm	Myrtaceae	Dicot	Bicellular	Dry	Starchless	Potts	1989	0	https://www.publish.csiro.au/bt/BT9890429	Potts & Marsden-Smedley, 1989		0.2	3.24
556	Lablab purpureus	Lablab purpureus (L.)Sweet	Cultivated	Angiosperm	Fabaceae	Dicot	Bicellular	Wet	NA	Bhardwaj	1989	0	http://apps.webofknowledge.com/full_record.do?product=UA&search_mode=GeneralSearch&qid=2&SID=F1uTn7gEUbHE3FS3ljY&page=3&doc=30&cacheurlFromRightClick=no	Bhardwaj et al., 1989	0	0.2
557	Datura metel	Datura metel L.	Wild	Angiosperm	Solanaceae	Dicot	Bicellular	Wet	Starchy and starchless	Dhingra	1989	1	https://www.samviti.com/img/1341/society/publication/ijpp-32o-3-017.pdf	Dhingra & Varghese, 1989	0.007	0.1	1.62
558	Zea mays	Zea mays L.	Cultivated	Angiosperm	Poaceae	Monocot	Tricellular	Dry	NA	Hoekstra	1989	1	https://onlinelibrary.wiley.com/doi/epdf/10.1111/j.1365-3040.1989.tb01919.x	Hoekstra et al., 1989
559	Pennisetum typhoides (Burm.f.) Stapf & C.E.Hubb.	Pennisetum glaucum (L.) R.Br.	Wild	Angiosperm	Poaceae	Monocot	Tricellular	Dry	NA	Hoekstra	1989	1	https://onlinelibrary.wiley.com/doi/epdf/10.1111/j.1365-3040.1989.tb01919.x	Hoekstra et al., 1989	0.006	0.274				8						0.8				1																			1 Na- PO₄³⁻ citrate
560	Solanum genotypes	Solanum	Cultivated	Angiosperm	Solanaceae	Dicot	Bicellular	Wet	Starchy and starchless	Calleberg	1989	1	https://link.springer.com/content/pdf/10.1007/BF00043346.pdf	Calleberg et al., 1989	?	0.125	1.14			0.1						0.84						1.25
561	Lilium longiflorum Thunb.	Lilium longiflorum Thunb.	Wild	Angiosperm	Liliaceae	Monocot	Bicellular	Wet	Starchless	Rajam	1989	1	https://reader.elsevier.com/reader/sd/pii/0168945289900071?token=C7827A482233C4181BE9E53C15FE56750685DFE2F738216750D400DBEBDF6A3A2D2F2DBEA90931851528F61909BAD747	Rajam, 1989	0	0.1	1.62			1.27						0.82				0.99
562	Ziziphus jujuba Miller	Ziziphus jujuba Mill.	Cultivated	Angiosperm	Rhamnaceae	Dicot	Bicellular	Dry	Starchless	Yun	1989	0	https://agris.fao.org/agris-search/search.do?recordID=KR8935942	Yun et al., 1989	0.01	0.15		3.24
563	Medicago sativa L.	Medicago sativa L.	Cultivated	Angiosperm	Fabaceae	Dicot	Bicellular	Wet	NA	Smith	1989	1	https://link.springer.com/content/pdf/10.1007/BF00023059.pdf	Smith et al., 1989	0.02		16.18			16.48 (H2O)										19.79
564	Vitis labrusca Himrod	Vitis labrusca L.	Cultivated	Angiosperm	Vitaceae	Dicot	Bicellular	Dry	Starchless	Wang	1990	1	https://www.jstage.jst.go.jp/article/jjshs1925/59/3/59_3_455/_pdf	Wang & Horiuchi, 1990	0.01	0.2
565	Vitis labruscana Bailey	Vitis labruscana L.H. Bailey	Cultivated	Angiosperm	Vitaceae	Dicot	Bicellular	Dry	Starchless	Wang	1990	1	https://www.jstage.jst.go.jp/article/jjshs1925/59/3/59_3_455/_pdf	Wang & Horiuchi, 1990	0.01	0.2
566	Gossypium hirsutum L.	Gossypium hirsutum L.	Cultivated	Angiosperm	Malvaceae	Dicot	Bicellular	Dry	Starchy	Almeida	1990	0	http://apps.webofknowledge.com/full_record.do?product=UA&search_mode=GeneralSearch&qid=7&SID=F1uTn7gEUbHE3FS3ljY&page=1&doc=4&cacheurlFromRightClick=no	Almeida et al., 1990	0.01	0.15	4.86			3.66								5.97
567	Capsella bursa-pastoris	Capsella bursa-pastoris (L.) Medik.	Cultivated	Angiosperm	Brassicaceae	Dicot	Tricellular	Dry	NA	Leduc	1990	1	https://link.springer.com/content/pdf/10.1007/BF00202880.pdf	Leduc et al., 1990			0.81								7.93	3																			0.01 (B1), 0.01 (B6)
568	Bactris gasipaes	Bactris gasipaes Kunth	Cultivated	Angiosperm	Arecaceae	Monocot	Bicellular	Dry	NA	Miranda	1990	0	https://www.cabdirect.org/cabdirect/abstract/19930667443	Mirianda & Clement, 1990		0.025		0.01
569	Lathyrus sylvestris L.	Lathyrus sylvestris	Cultivated	Angiosperm	Fabaceae	Dicot	Bicellular	Wet	NA	Coulombe	1990	1	https://link.springer.com/content/pdf/10.1007/BF00038824.pdf	Coulombe et al., 1990	0 .7% (phytagar)	0.1	0.05
570	Brassica napus	Brassica napus L.	Cultivated	Angiosperm	Brassicaceae	Dicot	Tricellular	Dry	NA	Hodgkin	1990	1	https://link.springer.com/content/pdf/10.1007/BF00198855.pdf	Hodgkin, 1990		0.199	1.62			1.69						0.88 (7H2O)				0.99																			20 TAPS
571	Cocos nucifera L.	Cocos nucifera L.	Cultivated	Angiosperm	Arecaceae	Monocot	Bicellular	Dry	NA	Verdeil	1990	0	https://www.cabdirect.org/cabdirect/abstract/19921627210	Verdeil & Pannetier, 1990		0.12	1.62			1.83						1.67
572	Solanum tuberosum	Solanum tuberosum L.	Cultivated	Angiosperm	Solanaceae	Dicot	Bicellular	Wet	Starchy and starchless	Kristjansdottir	1990	1	https://link.springer.com/content/pdf/10.1007/BF00224028.pdf	Kristjansdottir, 1990		0.125	1.14			0.1						0.83						1.25
573	Gladiolus	Gladiolus sp.	Cultivated	Angiosperm	Iridaceae	Monocot	Bicellular	Dry	Starchless	Choudhary	1990	0	https://www.cabdirect.org/cabdirect/abstract/19920317525	Choudhary, 1990		0.15	1.22
574	Pinus pinea	Pinus pinea L.	Wild	Gymnosperm	Pinaceae				NA	Cela Renzoni	1990	1	https://www.jstor.org/stable/pdf/43922176.pdf	Cela Renzoni et al., 1990	0.015	0.09
575	Solanum torvum L.	Solanum torvum Sw.	Wild	Angiosperm	Solanaceae	Dicot	Bicellular	Wet	Starchy and starchless	Chauhan	1990	1	https://www.jstage.jst.go.jp/article/cytologia1929/55/4/55_4_535/_pdf	Chauhan & Katiyar, 1990	0	0.1	1.62			1.27						0.81				0.99
576	Pinus cembra L.	Pinus cembra L.	Wild	Gymnosperm	Pinaceae				NA	Paoletti	1990	1	https://reader.elsevier.com/reader/sd/pii/026974919090192F?token=7D60E1422F276C237B7BFF1EBC78611580532D308BF9B2DCE181975FF5A2B1875FBB7F41A717C359830D4A7A07196693	Paoletti & Bellani, 1990	0	0.05	1.62			1.27						0.81				0.99
577	Sambucus nigra L.	Sambucus nigra L.	Cultivated	Angiosperm	Viburnaceae	Dicot	Tricellular	Dry	NA	Paoletti	1990	1	https://reader.elsevier.com/reader/sd/pii/026974919090192F?token=7D60E1422F276C237B7BFF1EBC78611580532D308BF9B2DCE181975FF5A2B1875FBB7F41A717C359830D4A7A07196693	Paoletti & Bellani, 1990	0	0.1	1.62			1.27						0.81				0.99
578	Nicotiana tabacum L.	Nicotiana tabacum L.	Cultivated	Angiosperm	Solanaceae	Dicot	Bicellular	Wet	Starchy and starchless	Hoffmann	1990	1	https://reader.elsevier.com/reader/sd/pii/026974919090066L?token=73429205AA108C3341CD882D8E9EACCA31369BA2C509CA32DCA77EE74E25181310DE6E7AD8FD461CAE6422262624B88F	Hoffmann et al., 1990	0	0.1	1.62
579	Arabidopsis thaliana	Arabidopsis thaliana (L.) Heynh.	Cultivated	Angiosperm	Brassicaceae	Dicot	Tricellular	Dry	NA	Azarov	1990	1	https://www.researchgate.net/profile/Anatoly_Azarov/publication/285916539_Effect_of_sodium_chloride_on_pollen_germination_and_pollen_tube_growth_in_vitro_in_Arabidopsis_thaliana_L_Heynh/links/5c40616a92851c22a37b4a31/Effect-of-sodium-chloride-on-pollen-germination-and-pollen-tube-growth-in-vitro-in-Arabidopsis-thaliana-L-Heynh.pdf	Azarov et al., 1990	0.003	0.025	0.81			0.21 (4H2O)					0.08	0.11					0.1	0.03 (3H2O)
580	Clianthus formosus (G.Don) Ford & Vickery	Swainsona formosa (G.Don)J.Thompson	Wild	Angiosperm	Fabaceae	Dicot	Bicellular	Wet	NA	Hughes	1991	1	https://journals.ashs.org/hortsci/view/journals/hortsci/26/11/article-p1411.xml	Hughes et al., 1991	0.0075	0.1	0.33			2.75 (H2O)						0.82 (7H2O)				1.98
581	Pyrus serotina Rehder	Pyrus pyrifolia (Burm.f.) Nakai	Cultivated	Angiosperm	Rosaceae	Dicot	Bicellular	Wet	Starchy and starchless	Hiratsuka	1991	1	https://www.jstage.jst.go.jp/article/jjshs1925/60/2/60_2_257/_pdf	Hiratsuka et al., 1991	0.01	0.1	1.62
582	Phytolacca dodecandra	Phytolacca dodecandra L'Hér.	Cultivated	Angiosperm	Phytolaccaceae	Dicot	Tricellular	Dry	NA	Demeke	1991	1	https://academic.oup.com/aob/article/68/1/13/133538	Demeke & Hughes, 1991	0	0.1	0.17
583	Pistacia vera L.	Pistacia vera L.	Cultivated	Angiosperm	Anacardiaceae	Dicot	Bicellular	Wet	Starchy and starchless	Golangoldhirsh	1991	1	https://link.springer.com/content/pdf/10.1007/BF00190002.pdf	Golan-Goldhirsh et al., 1991	0	0	1.6			1.3 (4H2O)						0.81 (7H2O)				1
584	Solanum venturii	Solanum venturii Hawkes & Hjerting	Cultivated	Angiosperm	Solanaceae	Dicot	Bicellular	Wet	Starchy and starchless	Bamberg	1991	1	https://link.springer.com/content/pdf/10.1007/BF02853618.pdf	Bamberg & Hanneman, 1991		20% (Lactose)		4.62
585	Solanum tuberosum	Solanum tuberosum L.	Cultivated	Angiosperm	Solanaceae	Dicot	Bicellular	Wet	Starchy and starchless	Bamberg	1991	1	https://link.springer.com/content/pdf/10.1007/BF02853618.pdf	Bamberg & Hanneman, 1991		20% (Lactose)		4.62
586	Endymion non-scriptus (L.) Garcke	Hyacinthoides non-scripta (L.) Chouard ex Rothm.	Wild	Angiosperm	Asparagaceae	Monocot	Bicellular	Dry	NA	Heslopharrison	1991	1	https://link.springer.com/content/pdf/10.1007/BF00196491.pdf	Heslop-harrison et al., 1991		0.15	1			1
587	Rosa hybrida L.	Rosa hybrida L.	Cultivated	Angiosperm	Rosaceae	Dicot	Bicellular	Dry	Starchy and starchless	Gudin	1991	1	https://link.springer.com/content/pdf/10.1007/BF00196496.pdf	Gudin & Arene, 1991	?
588	Citrus sinensis (L.) Osbeck × Poncirus trifoliata (L.) Raf.	Citrus sinensis (L.) Osbeck × Poncirus trifoliata (L.) Raf.	Cultivated	Angiosperm	Rutaceae	Dicot	Bicellular	Wet	Starchy and starchless	Kobayashi	1991	1	https://journals.ashs.org/hortsci/abstract/journals/hortsci/26/2/article-p207.xml	Kobayashi et al., 1991	0.02	0.2
589	Chortolirion angolense	Chortolirion angolense (Baker) A.Berger	Wild	Angiosperm	Asphodelaceae	Monocot	NA	NA	NA	Smith	1991	1	https://www.jstor.org/stable/pdf/1222923.pdf?refreqid=excelsior%3Ae276d18bafa55ad8e6f5edf2851a3fe9	Smith, 1991	0	0.02	1.36
590	Haworthia attenuata	Haworthia attenuata (Haw.) Haw.	Wild	Angiosperm	Asphodelaceae	Monocot	Bicellular	Dry	NA	Smith	1991	1	https://www.jstor.org/stable/pdf/1222923.pdf?refreqid=excelsior%3Ae276d18bafa55ad8e6f5edf2851a3fe9	Smith, 1991	0	0.02	1.36
591	Allamanda neriifolia Hook.	Allamanda schottii Pohl	Wild	Angiosperm	Apocynaceae	Dicot	Bicellular	Dry and wet	Starchless	Xu	1991	0	http://apps.webofknowledge.com/full_record.do?product=UA&search_mode=GeneralSearch&qid=2&SID=F3cFa6dCTEy4Ruv452N&page=2&doc=19&cacheurlFromRightClick=no	Xu & Zee, 1991		0.5
592	Malus domestica	Malus domestica Borkh.	Cultivated	Angiosperm	Rosaceae	Dicot	Bicellular	Wet	Starchy and starchless	Lecuyer	1991	1	https://www.agronomy-journal.org/articles/agro/pdf/1991/06/Agronomie_0249-5627_1991_11_6_ART0005.pdf	Lecuyer et al., 1991		0.2	0.33
593	Pinus pinaster	Pinus pinaster Aiton	Wild	Gymnosperm	Pinaceae				NA	Renzoni	1991	1	https://www.jstor.org/stable/pdf/23725402.pdf?refreqid=excelsior%3A663f146ff9e8c48aa04d7aaae9d23dbd	Renzoni & Viegi, 1991	0	0.09
594	Pinus pinea	Pinus pinea L.	Wild	Gymnosperm	Pinaceae				NA	Renzoni	1991	1	https://www.jstor.org/stable/pdf/23725402.pdf?refreqid=excelsior%3A663f146ff9e8c48aa04d7aaae9d23dbd	Renzoni & Viegi, 1991	0	0.09
595	Prunus persica	Prunus persica (L.) Batsch	Cultivated	Angiosperm	Rosaceae	Dicot	Bicellular	Wet	Starchy and starchless	Barbosa	1991	1	https://www.scielo.br/pdf/brag/v50n1/02.pdf	Barbosa et al., 1991	0.007	0.05
596	Dactylis glomerata L.	Dactylis glomerata L.	Cultivated	Angiosperm	Poaceae	Monocot	Tricellular	Dry	NA	Cauneau-Pigot	1991	1	https://www.tandfonline.com/doi/abs/10.1080/00173139109432024#aHR0cHM6Ly93d3cudGFuZGZvbmxpbmUuY29tL2RvaS9wZGYvMTAuMTA4MC8wMDE3MzEzOTEwOTQzMjAyND9uZWVkQWNjZXNzPXRydWVAQEAw	Cauneau-Pigot, 1991	?
597	Secale cereale L.	Secale cereale L.	Cultivated	Angiosperm	Poaceae	Monocot	Tricellular	Dry	NA	Ostash	1992	1	https://nph.onlinelibrary.wiley.com/doi/epdf/10.1111/j.1469-8137.1992.tb00100.x	Ostash et al., 1992	0	0.25	1.01			1.28 (4H2O)								0.02 (4H2O)
598	Pennisetum glaucum	Pennisetum glaucum (L.) R.Br.	Wild	Angiosperm	Poaceae	Monocot	Tricellular	Dry	NA	Reger	1992	1	https://link.springer.com/content/pdf/10.1007/BF00189812.pdf	Reger et al., 1992	0.01	0.1	1
599	Zea mays	Zea mays L.	Cultivated	Angiosperm	Poaceae	Monocot	Tricellular	Dry	NA	Booy	1992	1	https://link.springer.com/content/pdf/10.1007/BF00189816.pdf	Booy et al., 1992	0.008	0.15	1.62			1.28 (4H2O)
600	Raphanus sativus L.	Raphanus raphanistrum subsp. sativus (L.) Domin	Cultivated	Angiosperm	Brassicaceae	Dicot	Tricellular	Dry	NA	Matsubara	1992	1	https://www.jstage.jst.go.jp/article/jjshs1925/61/1/61_1_79/_pdf	Matsubara and Miki, 1992	0.2% (gelrite)	0.15	0.81								0.91
601	Narcissus pseudonarcissus L.	Narcissus pseudonarcissus L.	Cultivated	Angiosperm	Amaryllidaceae	Monocot	Bicellular	Dry	Starchless	Heslopharrison	1992	1	https://academic.oup.com/aob/article/69/5/395/247174	Heslop-Harrison & Heslop-Harrison, 1992	0	0.075	1			1
602	Lycopersicon esculentum Mill.	Lycopersicon esculentum Mill.	Cultivated	Angiosperm	Solanaceae	Dicot	Bicellular	Wet	Starchy and starchless	Abdulbaki	1992	1	https://journals.ashs.org/jashs/view/journals/jashs/117/3/article-p473.xml	Abdul-Baki, 1992	0	0.099	0.16			1.27										1
603	Triticum aestivum L.	Triticum aestivum L.	Cultivated	Angiosperm	Poaceae	Monocot	Tricellular	Dry	NA	Cheng	1992	1	https://nph.onlinelibrary.wiley.com/doi/epdf/10.1111/j.1469-8137.1992.tb01793.x	Cheng & Mcomb, 1992	0.007	37.83% (raffinose)	1.62								2.05 (2H2O)
604	Carya illinoinensis	Carya illinoinensis (Wangenh.) K.Koch	Wild	Angiosperm	Juglandaceae	Dicot	Bicellular	Dry	Starchless	Marquard	1992	1	https://journals.ashs.org/jashs/view/journals/jashs/117/2/article-p328.xml	Marquard, 1992	0.02	0.15	1.62			1.83						1.67				0.99
605	Allium victorialis subsp. platyphyllum Hultén	Allium ochotense Prokh.	Wild	Angiosperm	Amaryllidaceae	Monocot	Bicellular	Dry	Starchless	Kanazawa	1992	1	https://www.jstage.jst.go.jp/article/jjshs1925/60/4/60_4_947/_pdf	Kanazawa et al., 1992	0.01	0.15
606	Vicia faba L.	Vicia faba L.	Cultivated	Angiosperm	Fabaceae	Dicot	Bicellular	Wet	NA	Bednarska	1992	1	https://link.springer.com/content/pdf/10.1007/BF02925875.pdf	Bednarska, 1992	0	10 %	0.17								0.28
607	Cajanus cajan	Cajanus cajan (L.) Millsp.	Cultivated	Angiosperm	Fabaceae	Dicot	Bicellular	Wet	NA	Singh	1992	1	https://link.springer.com/content/pdf/10.1007/BF02923602.pdf	Singh et al., 1992	0.007	40 %	4.04			3.24
608	Juglans regia Linn	Juglans regia L.	Cultivated	Angiosperm	Juglandaceae	Dicot	Bicellular	Dry	Starchless	Parihar	1992	0	http://apps.webofknowledge.com/full_record.do?product=UA&search_mode=GeneralSearch&qid=3&SID=D4J5dxCAYIPgiE1togL&page=3&doc=26&cacheurlFromRightClick=no	Parihar & Bajpai, 1992	0.01	9% (glucose)
609	Arachis glabrata Benth.	Arachis glabrata Benth.	Cultivated	Angiosperm	Fabaceae	Dicot	Bicellular	Wet	NA	Niles	1992	1	https://www.peanutscience.com/doi/pdf/10.3146/i0095-3679-19-2-11	Niles & Quesenberry, 1992	0	0.1	1.62			1.06 (4H2O)						0.82 (7H2O)				0.99
610	Nicotiana gossei	Nicotiana gossei Domin	Cultivated	Angiosperm	Solanaceae	Dicot	Bicellular	Wet	Starchy and starchless	Van Wert	1992	1	https://reader.elsevier.com/reader/sd/pii/016894529290202W?token=67BBB5BD3068BA3FDDC4D78A4015A4B762FE9A4859D190A4C5ADE0686E261DF0BB0F49B31CC8B1E87A1CD2949828435A	Van Wert & Saunders, 1992		0.1
611	Zea mays	Zea mays L.	Cultivated	Angiosperm	Poaceae	Monocot	Tricellular	Dry	NA	Van Wert	1992	1	https://reader.elsevier.com/reader/sd/pii/016894529290202W?token=67BBB5BD3068BA3FDDC4D78A4015A4B762FE9A4859D190A4C5ADE0686E261DF0BB0F49B31CC8B1E87A1CD2949828435A	Van Wert & Saunders, 1992	0.00625
612	Medicago sativa	Medicago sativa L.	Cultivated	Angiosperm	Fabaceae	Dicot	Bicellular	Wet	NA	Van Wert	1992	1	https://reader.elsevier.com/reader/sd/pii/016894529290202W?token=67BBB5BD3068BA3FDDC4D78A4015A4B762FE9A4859D190A4C5ADE0686E261DF0BB0F49B31CC8B1E87A1CD2949828435A	Van Wert & Saunders, 1992
613	Agapanthus umbellatus L'Hér.	Agapanthus africanus (L.) Hoffmanns.	Cultivated	Angiosperm	Amaryllidaceae	Monocot	Bicellular	Dry	Starchless	Malho	1992	1	https://link.springer.com/content/pdf/10.1007/BF00714558.pdf	Malh et al., 1992	0	0.01	1.62			1.22						0.81 (7H2O)				0.99
614	Malus domestica	Malus domestica Borkh.	Cultivated	Angiosperm	Rosaceae	Dicot	Bicellular	Wet	Starchy and starchless	Calzoni	1993	1	http://natuurtijdschriften.nl/download?type=document&docid=540945	Calzoni et al., 1993	0	0.068	3.2			1.3
615	Prunus mume Sieb.	Prunus mume (Siebold) Siebold & Zucc.	Cultivated	Angiosperm	Rosaceae	Dicot	Bicellular	Wet	Starchy and starchless	Suzuki	1993	1	https://www.jstage.jst.go.jp/article/jjshs1925/62/3/62_3_539/_pdf	Suzuki et al., 1993	0.01	0.2
616	Triticum genotypes	Triticum	Cultivated	Angiosperm	Poaceae	Monocot	Tricellular	Dry	NA	Cheng	1993	1	https://link.springer.com/content/pdf/10.1007/BF00025045.pdf	Cheng & Rerkasem, 1993	0.007	37.83% (raffinose)	1.62								2.05 (2H2O)
617	Epilobium angustifolium L.	Epilobium angustifolium L.	Wild	Angiosperm	Onagraceae	Dicot	Bicellular	Dry	Starchy	Heslopharrison	1993	1	https://onlinelibrary.wiley.com/doi/epdf/10.1111/j.1438-8677.1993.tb00757.x	Heslop-Harrison & Heslop-Harrison, 1993	0	0.2	1			2
618	Pseudotsuga menziesii	Pseudotsuga menziesii (Mirb.) Franco	Cultivated	Gymnosperm	Pinaceae				NA	Webber	1993	1	https://www.afs-journal.org/articles/forest/pdf/1993/01/AFS_0003-4312_1993_50_1_ART0001.pdf	Webber & Bonnet-Masimbert, 1993		0.075	1.62			1.28 (4H2O)						0.82 (7H2O)				0.99
619	Cicer arietinum L.	Cicer arietinum L.	Wild	Angiosperm	Fabaceae	Dicot	Bicellular	Wet	NA	Dhingra	1993	1	https://link.springer.com/content/pdf/10.1007/BF02928525.pdf	Dhingra & Varghese, 1993	0.7 %	0.171	1.62			0.61
620	Sesbania sesban	Sesbania sesban (L.) Merr.	Cultivated	Angiosperm	Fabaceae	Dicot	Bicellular	Wet	NA	Owuor	1993	1	https://link.springer.com/content/pdf/10.1007/BF00023755.pdf	Owuor & Owino, 1993	0	0.1
621	Anigozanthos manglesii	Anigozanthos manglesii D.Don	Wild	Angiosperm	Haemodoraceae	Monocot	Bicellular	Wet	NA	Sukhvibul	1993	1	https://www.tandfonline.com/doi/abs/10.1080/01140671.1993.9513792#aHR0cHM6Ly93d3cudGFuZGZvbmxpbmUuY29tL2RvaS9wZGYvMTAuMTA4MC8wMTE0MDY3MS4xOTkzLjk1MTM3OTI/bmVlZEFjY2Vzcz10cnVlQEBAMA==	Sukhvibul & Considine, 1993	0.008	0.1	3.24
622	Nicotiana	Nicotiana	Cultivated	Angiosperm	Solanaceae	Dicot	Bicellular	Wet	Starchy and starchless	Odriscoll	1993	1	https://link.springer.com/content/pdf/10.1007/BF01385010.pdf	O'Driscoll et al., 1993		0.05	1.6								1	0.8							1				0.03												15 MES
623	Tradescantia	Tradescantia	Wild	Angiosperm	Commelinaceae	Monocot	Bicellular	Dry	Starchless	Odriscoll	1993	1	https://link.springer.com/content/pdf/10.1007/BF01385010.pdf	O'Driscoll et al., 1993		0.1	1.62								10							5
624	Erythronium grandiflorum	Erythronium grandiflorum Pursh	Wild	Angiosperm	Liliaceae	Monocot	Bicellular	Dry	Starchless	Thomson	1994	1	https://www.jstor.org/stable/pdf/2445401.pdf?refreqid=excelsior%3A51c4773b2f7c977b59389dd29c0be8fc	Thomson et al., 1994	8% (gelatin)	0.1
625	Zea mays L.	Zea mays L.	Cultivated	Angiosperm	Poaceae	Monocot	Tricellular	Dry	NA	Broglia	1994	1	https://pdfs.semanticscholar.org/77f5/4817641062c8197f2d08886c9cf1f919663f.pdf?_ga=2.119202313.1641320232.1589781926-218708052.1585738021	Broglia & Brunori, 1994	0	0.188	1.62								2.05 (2H2O)
626	Nicotiana tabacum L.	Nicotiana tabacum L.	Cultivated	Angiosperm	Solanaceae	Dicot	Bicellular	Wet	Starchy and starchless	Loguercio	1994	1	https://link.springer.com/content/pdf/10.1007/BF00239899.pdf	Loguercio et al., 1994			1.62			1.5 (4H2O)						0.82 (7H2O)				0.99
627	Nicotiana tabacum L.	Nicotiana tabacum L.	Cultivated	Angiosperm	Solanaceae	Dicot	Bicellular	Wet	Starchy and starchless	Chibi	1994	1	https://watermark.silverchair.com/45-5-529.pdf?token=AQECAHi208BE49Ooan9kkhW_Ercy7Dm3ZL_9Cf3qfKAc485ysgAAApEwggKNBgkqhkiG9w0BBwagggJ-MIICegIBADCCAnMGCSqGSIb3DQEHATAeBglghkgBZQMEAS4wEQQM5MfGwJq32gB3h5ZVAgEQgIICRLFLlDGMQvxgNFPH1rcLILyBm_uoMsAVNi3UGMyc-WNrZyoKoKEmWWCLdekLLc-EH_atT13WauIdzjb4eaVfL1Mb3WSYxoBBNTfouyhBaba_VTaNM5q7k9k_8InxjAFopN54jKZMjwlRQRvvo9iDCGaAz23brfEZqhnwz_SohUlUhHab-uKIC29bN3-ECR…	Chibi & Matilla, 1994			3.24
628	Capsicum annuum	Capsicum annuum L.	Cultivated	Angiosperm	Solanaceae	Dicot	Bicellular	Wet	Starchy and starchless	Mercado	1994	1	https://www.sciencedirect.com/science/article/pii/0304423894901104?via%3Dihub	Mercado et al., 1994	0	0.075	0.1								1
629	Secale cereale L.	Secale cereale L.	Cultivated	Angiosperm	Poaceae	Monocot	Tricellular	Dry	NA	Wehling	1994	1	https://link.springer.com/content/pdf/10.1007/BF00230574.pdf	Wehling et al., 1994	0	0.25	3.24								1.81
630	Pinus massoniana	Pinus massoniana Lamb.	Wild	Gymnosperm	Pinaceae				NA	Lai, Huanlin	1994	0	http://apps.webofknowledge.com/full_record.do?product=UA&search_mode=GeneralSearch&qid=2&SID=E3sNC4UTMT14rKx1zlY&page=3&doc=27&cacheurlFromRightClick=no	Huanlin et al., 1994		5% (glucose)	0.65
631	Papaver rhoeas L.	Papaver rhoeas L.	Wild	Angiosperm	Papaveraceae	Dicot	Bicellular	Dry	Starchless	Dhingra	1994	1	https://www.samviti.com/img/1341/society/publication/ijpp-37o-3-010.pdf	Dhingra, 1994	0.7%(bacto-agar)	0.15	1.62
632	Kochia scoparia (L.) Schrad.	Bassia scoparia (L.) A.J.Scott	Cultivated	Angiosperm	Amaranthaceae	Dicot	Tricellular	Dry	NA	Mulugeta	1994	1	https://www.jstor.org/stable/pdf/4045452.pdf?refreqid=excelsior%3A957f8c515c497283c5de4134f6ebb483	Mulugeta et al., 1994	100% RH
633	Pinus densiflora	Pinus densiflora Siebold & Zucc.	Wild	Gymnosperm	Pinaceae				NA	Terasaka	1994	1	https://link.springer.com/content/pdf/10.1007/BF00227708.pdf	Terasaka & Niitsu, 1994	0
634	Pinus densiflora	Pinus densiflora Siebold & Zucc.	Wild	Gymnosperm	Pinaceae				NA	Terasaka	1994	1	https://link.springer.com/content/pdf/10.1007/BF00227708.pdf	Terasaka & Niitsu, 1994	0.03
635	Pinus thunbergii	Pinus thunbergii Parl.	Wild	Gymnosperm	Pinaceae				NA	Terasaka	1994	1	https://link.springer.com/content/pdf/10.1007/BF00227708.pdf	Terasaka & Niitsu, 1994	0
636	Pinus thunbergii	Pinus thunbergii Parl.	Wild	Gymnosperm	Pinaceae				NA	Terasaka	1994	1	https://link.springer.com/content/pdf/10.1007/BF00227708.pdf	Terasaka & Niitsu, 1994	0.03
637	Allium fistulosum	Allium fistulosum L.	Cultivated	Angiosperm	Amaryllidaceae	Monocot	Bicellular	Dry	Starchless	Nomura	1994	1	https://www.jstage.jst.go.jp/article/jsbbs1951/44/2/44_2_151/_pdf/-char/en	Nomura et al. 1994	0.008	0.08	1.62			3.66
638	Allium cepa	Allium cepa L.	Cultivated	Angiosperm	Amaryllidaceae	Monocot	Bicellular	Dry	Starchless	Nomura	1994	1	https://www.jstage.jst.go.jp/article/jsbbs1951/44/2/44_2_151/_pdf/-char/en	Nomura et al. 1994	0.008	0.08	1.62			3.66
639	Allium tuberosum	Allium tuberosum Rottler ex Spreng.	Cultivated	Angiosperm	Amaryllidaceae	Monocot	Bicellular	Dry	Starchless	Nomura	1994	1	https://www.jstage.jst.go.jp/article/jsbbs1951/44/2/44_2_151/_pdf/-char/en	Nomura et al. 1994	0.008	0.08	1.62			3.66
640	Allium ampeloprasum	Allium ampeloprasum L.	Cultivated	Angiosperm	Amaryllidaceae	Monocot	Bicellular	Dry	Starchless	Nomura	1994	1	https://www.jstage.jst.go.jp/article/jsbbs1951/44/2/44_2_151/_pdf/-char/en	Nomura et al. 1994	0.008	0.08	1.62			3.66
641	Fagus sylvatica	Fagus sylvatica L.	Wild	Angiosperm	Fagaceae	Dicot	Bicellular	Dry	Starchless	Paoletti	1995	1	https://www.jstor.org/stable/pdf/2404823.pdf?refreqid=excelsior%3A74eaa560e8569a670bb3e6384729346e	Paoletti & Raddi, 1995		0.25
642	Brassica napus L.	Brassica napus L.	Cultivated	Angiosperm	Brassicaceae	Dicot	Tricellular	Dry	NA	Shivanna	1995	1	https://academic.oup.com/jxb/article/46/11/1771/496890	Shivanna & Sawhney, 1995		0.199	1.62			1.69						0.84				0.99																			20 TAPS
643	Brassica napus L.	Brassica napus L.	Cultivated	Angiosperm	Brassicaceae	Dicot	Tricellular	Dry	NA	Shivanna	1995	1	https://academic.oup.com/jxb/article/46/11/1771/496890	Shivanna & Sawhney, 1995		0.1	1.62			1.69						0.84				0.99																			20 TAPS
644	Brassica napus L.	Brassica napus L.	Cultivated	Angiosperm	Brassicaceae	Dicot	Tricellular	Dry	NA	Shivanna	1995	1	https://academic.oup.com/jxb/article/46/11/1771/496890	Shivanna & Sawhney, 1995		0.2	0.17								3.27					0.99
645	Brassica juncea L.	Brassica juncea (L.) Czern.	Cultivated	Angiosperm	Brassicaceae	Dicot	Tricellular	Dry	NA	Shivanna	1995	1	https://academic.oup.com/jxb/article/46/11/1771/496890	Shivanna & Sawhney, 1995		0.199	1.62			1.69						0.84				0.99																			20 TAPS
646	Brassica juncea L.	Brassica juncea (L.) Czern.	Cultivated	Angiosperm	Brassicaceae	Dicot	Tricellular	Dry	NA	Shivanna	1995	1	https://academic.oup.com/jxb/article/46/11/1771/496890	Shivanna & Sawhney, 1995		0.05	1.62			1.69						0.84				0.99																			20 TAPS
647	Brassica juncea L.	Brassica juncea (L.) Czern.	Cultivated	Angiosperm	Brassicaceae	Dicot	Tricellular	Dry	NA	Shivanna	1995	1	https://academic.oup.com/jxb/article/46/11/1771/496890	Shivanna & Sawhney, 1995		0.2	0.17								3.27					0.99
648	Brassica campestris subsp. oleifera (DC.) Schübl. & Mart.	Brassica rapa L.	Wild	Angiosperm	Brassicaceae	Dicot	Tricellular	Dry	NA	Shivanna	1995	1	https://academic.oup.com/jxb/article/46/11/1771/496890	Shivanna & Sawhney, 1995		0.199	1.62			1.69						0.84				0.99																			20 TAPS
649	Brassica campestris subsp. oleifera (DC.) Schübl. & Mart.	Brassica rapa L.	Wild	Angiosperm	Brassicaceae	Dicot	Tricellular	Dry	NA	Shivanna	1995	1	https://academic.oup.com/jxb/article/46/11/1771/496890	Shivanna & Sawhney, 1995		0.1	1.62			1.69						0.84				0.99																			20 TAPS
650	Brassica campestris subsp. oleifera (DC.) Schübl. & Mart.	Brassica rapa L.	Wild	Angiosperm	Brassicaceae	Dicot	Tricellular	Dry	NA	Shivanna	1995	1	https://academic.oup.com/jxb/article/46/11/1771/496890	Shivanna & Sawhney, 1995		0.2	0.17								3.27					0.99
651	Fragaria × ananassa	Fragaria x ananassa (Duchesne ex Weston) Duchesne ex Rozier	Cultivated	Angiosperm	Rosaceae	Dicot	Bicellular	Wet	Starchy and starchless	Zebrowska	1995	1	https://onlinelibrary.wiley.com/doi/epdf/10.1111/j.1439-0523.1995.tb00837.x	Zebrowska, 1995	0.006	0.08
652	Citrus reticulata var. austera Swingle × Fortunella sp.	Citrus reticulata var. austera Swingle × Fortunella sp.	Cultivated	Angiosperm	Rutaceae	Dicot	Bicellular	Wet	Starchy and starchless	Roiz	1995	1	https://onlinelibrary.wiley.com/doi/epdf/10.1111/j.1399-3054.1995.tb00971.x	Roiz et al., 1995	0	0.1
653	Tradescantia virginiana	Tradescantia virginiana L.	Wild	Angiosperm	Commelinaceae	Monocot	Bicellular	Dry	Starchless	He	1995	1	https://link.springer.com/content/pdf/10.1007/BF00228939.pdf	He et al., 1995	0	0.1
654	Gasteria verrucosa (Mill.) Duval	Gasteria carinata var. verrucosa (Mill.) van Jaarsv.	Wild	Angiosperm	Asphodelaceae	Monocot	Bicellular	Wet	NA	Willemse	1995	1	https://link.springer.com/content/pdf/10.1007/BF00242261.pdf	Willemse & Vletter, 1995	0	5.5%, 2.5% glucose	4.85			1.83						1.66				0.99
655	Nicotiana tabacum	Nicotiana tabacum L.	Cultivated	Angiosperm	Solanaceae	Dicot	Bicellular	Wet	Starchy and starchless	Moscatelli	1995	1	https://jcs.biologists.org/content/joces/108/3/1117.full.pdf	Moscatelli et al., 1995		0.15
656	Ficus carica L. var. Intermedia × F. carica L. var. sylvestris	Ficus carica L.	Cultivated	Angiosperm	Moraceae	Dicot	Bicellular	Dry	NA	Awamura	1995	1	https://www.jstage.jst.go.jp/article/jjshs1925/63/4/63_4_739/_pdf	Awamura et al., 1995	0.01	0.1
657	Amaryllis vittata	Hippeastrum vittatum (L'Hér.) Herb.	Wild	Angiosperm	Amaryllidaceae	Monocot	Bicellular	Dry	Starchless	Cai	1995	1	https://www.jstage.jst.go.jp/article/cytologia1929/60/2/60_2_133/_pdf	Cai et al., 1995	0	0.1	1.62
658	Rosa hybrida L.	Rosa hybrida L.	Cultivated	Angiosperm	Rosaceae	Dicot	Bicellular	Dry	Starchy and starchless	Voyiatzi	1995	1	https://link.springer.com/content/pdf/10.1007/BF01678130.pdf	Voyiatzi, 1995	0	0.15	0.81
659	Rosa hybrida L. var. 'Lady X'	Rosa hybrida L.	Cultivated	Angiosperm	Rosaceae	Dicot	Bicellular	Dry	Starchy and starchless	Voyiatzi	1995	1	https://link.springer.com/content/pdf/10.1007/BF01678130.pdf	Voyiatzi, 1995	0	0.2	1.62
660	Olea europaea L.	Olea europaea L.	Cultivated	Angiosperm	Oleaceae	Dicot	Bicellular	Dry	NA	Sepuleva Chavera	1995	0	http://apps.webofknowledge.com/full_record.do?product=UA&search_mode=GeneralSearch&qid=2&SID=E4P4D3atEuIADMPu7CP&page=4&doc=35&cacheurlFromRightClick=no	Sepuleva & Torres, 1995		0.1	1.62
661	Oryza sativa L.	Oryza sativa L.	Cultivated	Angiosperm	Poaceae	Monocot	Tricellular	Dry	NA	Khatun	1995	1	https://watermark.silverchair.com/46-1-151.pdf?token=AQECAHi208BE49Ooan9kkhW_Ercy7Dm3ZL_9Cf3qfKAc485ysgAAApEwggKNBgkqhkiG9w0BBwagggJ-MIICegIBADCCAnMGCSqGSIb3DQEHATAeBglghkgBZQMEAS4wEQQM3kHjEglfoTkWZaKBAgEQgIICRG2h1MA-CpHc2pdzDIxi10C0WpjafXKSVNDCFMjPQbhM3QjoEPHhC31cjsteLipGs4mMzclRNEgey9qNINT2PEx6ue8iTEePPJYB3K_1QJTh73lVOyfDUEm5dyxGURsbYX__Q4qI0dKwu9o0G_zmoIzz8uIyk_-mvLqY2HMMSie5qPMWBexo_21oJCePa6…	Khatun & Flowers, 1995	0.01	0.2	0.33
662	Nicotiana sylvestris	Nicotiana sylvestris Speg. & S. Comes	Cultivated	Angiosperm	Solanaceae	Dicot	Bicellular	Wet	Starchy and starchless	Kristen	1995	1	https://link.springer.com/content/pdf/10.1385%2F0-89603-282-5%3A189.pdf	Kristen & Kappler, 1995	0	0.1	1.62			3																													10 MES
663	Gasteria verrucosa (Mill.) Duval	Gasteria carinata var. verrucosa (Mill.) van Jaarsv.	Wild	Angiosperm	Asphodelaceae	Monocot	Bicellular	Wet	NA	Plyushch	1995	1	https://link.springer.com/content/pdf/10.1007/BF01280228.pdf	Plyushch et al., 1995	0.05% Difco agar	0.005	0.49				0.05					0.09 (7H2O)				0.1
664	Lilium longiflorum	Lilium longiflorum Thunb.	Wild	Angiosperm	Liliaceae	Monocot	Bicellular	Wet	Starchless	Sawidis	1995	1	https://link.springer.com/content/pdf/10.1007/BF01272851.pdf	Sawidis & Reiss, 1995	0	0.1	0.17
665	Hieracium aurantiacum L.	Pilosella aurantiaca (L.) F.W.Schultz & Sch.Bip.	Wild	Angiosperm	Asteraceae	Dicot	Tricellular	Dry	NA	Murphy	1995	1	https://www.jstor.org/stable/pdf/2445784.pdf?refreqid=excelsior%3A9b6d32fb96b53d792a7ff3101b969879	Murphy & Aarssen, 1995	1% lactose agar		1.62								2.71							0.74
666	Hieracium floribundum Wimm. & Grab.	Pilosella floribunda (Wimm. & Grab.) Fr.	Wild	Angiosperm	Asteraceae	Dicot	Tricellular	Dry	NA	Murphy	1995	1	https://www.jstor.org/stable/pdf/2445784.pdf?refreqid=excelsior%3A9b6d32fb96b53d792a7ff3101b969879	Murphy & Aarssen, 1995	1% lactose agar		1.62								2.71							0.74
667	Hieracium pratense Tausch	Pilosella caespitosa (Dumort.) P.D.Sell & C.West	Wild	Angiosperm	Asteraceae	Dicot	Tricellular	Dry	NA	Murphy	1995	1	https://www.jstor.org/stable/pdf/2445784.pdf?refreqid=excelsior%3A9b6d32fb96b53d792a7ff3101b969879	Murphy & Aarssen, 1995	1% lactose agar		1.62								2.71							0.74
668	Lotus corniculatus	Lotus corniculatus L.	Wild	Angiosperm	Fabaceae	Dicot	Bicellular	Wet	NA	Murphy	1995	1	https://www.jstor.org/stable/pdf/2445784.pdf?refreqid=excelsior%3A9b6d32fb96b53d792a7ff3101b969879	Murphy & Aarssen, 1995	1% lactose agar		1.62								2.71							0.74
669	Medicago sativa	Medicago sativa L.	Cultivated	Angiosperm	Fabaceae	Dicot	Bicellular	Wet	NA	Murphy	1995	1	https://www.jstor.org/stable/pdf/2445784.pdf?refreqid=excelsior%3A9b6d32fb96b53d792a7ff3101b969879	Murphy & Aarssen, 1995	1% lactose agar		1.62								2.71							0.74
670	Trifolium hybridum	Trifolium hybridum L.	Wild	Angiosperm	Fabaceae	Dicot	Bicellular	Wet	NA	Murphy	1995	1	https://www.jstor.org/stable/pdf/2445784.pdf?refreqid=excelsior%3A9b6d32fb96b53d792a7ff3101b969879	Murphy & Aarssen, 1995	1% lactose agar		1.62								2.71							0.74
671	Trifolium pratense	Trifolium pratense L.	Wild	Angiosperm	Fabaceae	Dicot	Bicellular	Wet	NA	Murphy	1995	1	https://www.jstor.org/stable/pdf/2445784.pdf?refreqid=excelsior%3A9b6d32fb96b53d792a7ff3101b969879	Murphy & Aarssen, 1995	1% lactose agar		1.62								2.71							0.74
672	Trifolium repens	Trifolium repens L.	Wild	Angiosperm	Fabaceae	Dicot	Bicellular	Wet	NA	Murphy	1995	1	https://www.jstor.org/stable/pdf/2445784.pdf?refreqid=excelsior%3A9b6d32fb96b53d792a7ff3101b969879	Murphy & Aarssen, 1995	1% lactose agar		1.62								2.71							0.74
673	Vicia cracca	Vicia cracca L.	Wild	Angiosperm	Fabaceae	Dicot	Bicellular	Wet	NA	Murphy	1995	1	https://www.jstor.org/stable/pdf/2445784.pdf?refreqid=excelsior%3A9b6d32fb96b53d792a7ff3101b969879	Murphy & Aarssen, 1995	1% lactose agar		1.62								2.71							0.74
674	Phleum pratense	Phleum pratense L.	Wild	Angiosperm	Poaceae	Monocot	Tricellular	Dry	NA	Murphy	1995	1	https://www.jstor.org/stable/pdf/2475060.pdf?refreqid=excelsior%3Aecfead0bc1e8dcebe3f96f9cb8e94a2b	Murphy & Aarssen, 1995	1% lactose agar		1.62								2.71							0.74
675	Agropyron repens (L.) P.Beauv.	Elymus repens (L.) Gould	Wild	Angiosperm	Poaceae	Monocot	Tricellular	Dry	NA	Murphy	1995	1	https://www.jstor.org/stable/pdf/2475060.pdf?refreqid=excelsior%3Aecfead0bc1e8dcebe3f96f9cb8e94a2b	Murphy & Aarssen, 1995	1% lactose agar		1.62								2.71							0.74
676	Agrostis stolonifera	Agrostis stolonifera L.	Wild	Angiosperm	Poaceae	Monocot	Tricellular	Dry	NA	Murphy	1995	1	https://www.jstor.org/stable/pdf/2475060.pdf?refreqid=excelsior%3Aecfead0bc1e8dcebe3f96f9cb8e94a2b	Murphy & Aarssen, 1995	1% lactose agar		1.62								2.71							0.74
677	Bromus inermis	Bromus inermis Leyss.	Wild	Angiosperm	Poaceae	Monocot	Tricellular	Dry	NA	Murphy	1995	1	https://www.jstor.org/stable/pdf/2475060.pdf?refreqid=excelsior%3Aecfead0bc1e8dcebe3f96f9cb8e94a2b	Murphy & Aarssen, 1995	1% lactose agar		1.62								2.71							0.74
678	Danthonia compress	Danthonia compressa Austin	Wild	Angiosperm	Poaceae	Monocot	Tricellular	Dry	NA	Murphy	1995	1	https://www.jstor.org/stable/pdf/2475060.pdf?refreqid=excelsior%3Aecfead0bc1e8dcebe3f96f9cb8e94a2b	Murphy & Aarssen, 1995	1% lactose agar		1.62								2.71							0.74
679	Poa compressa	Poa compressa L.	Wild	Angiosperm	Poaceae	Monocot	Tricellular	Dry	NA	Murphy	1995	1	https://www.jstor.org/stable/pdf/2475060.pdf?refreqid=excelsior%3Aecfead0bc1e8dcebe3f96f9cb8e94a2b	Murphy & Aarssen, 1995	1% lactose agar		1.62								2.71							0.74
680	Vaccinium corymbosum	Vaccinium corymbosum L.	Cultivated	Angiosperm	Ericaceae	Dicot	Bicellular	Wet	Starchless	Huang	1996	1	http://apps.webofknowledge.com/full_record.do?product=UA&search_mode=GeneralSearch&qid=12&SID=F3yiJMyrtKCmyRbkdfh&page=1&doc=1&cacheurlFromRightClick=no	Huang & Johnson, 1996	0.025	0.099	1.62			1.69 (4H2O)						0.82 (7H2O)				0.99
681	Solanum tuberosum L.	Solanum tuberosum L.	Cultivated	Angiosperm	Solanaceae	Dicot	Bicellular	Wet	Starchy and starchless	Rihova	1996	1	https://www.jstor.org/stable/pdf/2475293.pdf?refreqid=excelsior%3Ae87beeec42652a8f828b06205e7876a3	Říhová et al., 1996		0.02	1.6
682	Lilium longiflorum	Lilium longiflorum Thunb.	Wild	Angiosperm	Liliaceae	Monocot	Bicellular	Wet	Starchless	Li	1996	1	https://link.springer.com/content/pdf/10.1007/BF00196647.pdf	Li et al., 1996	0	0.099	0.16			1.29										0.99
683	Lilium longiflorum	Lilium longiflorum Thunb.	Wild	Angiosperm	Liliaceae	Monocot	Bicellular	Wet	Starchless	Li	1996	1	https://link.springer.com/content/pdf/10.1007/BF00196647.pdf	Li et al., 1996	0.005	0.099	0.16			1.29										0.99
684	Opuntia echios	Opuntia echios Howell	Wild	Angiosperm	Cactaceae	Dicot	Tricellular	Wet	Starchy and starchless	Grant	1996	1	https://www.jstor.org/stable/pdf/2265624.pdf?refreqid=excelsior%3A63745220bd10051fbb9d4719f1ecf5bd	Grant, 1996	0	Opuntia nectar
685	Pisum sativum L.	Pisum sativum L.	Cultivated	Angiosperm	Fabaceae	Dicot	Bicellular	Wet	NA	Kajal	1996	1	https://www.samviti.com/img/1341/society/publication/ijpp-1-4-018.pdf	Kajal, 1996	0.006	0.15	1.62
686	Arabidopsis thaliana	Arabidopsis thaliana (L.) Heynh.	Cultivated	Angiosperm	Brassicaceae	Dicot	Tricellular	Dry	NA	Kim	1996	1	http://www.koreascience.or.kr/article/JAKO199611920117957.page	Kim et al., 1996	0.01	0.15	2								4.4																								0.52 MES
687	Cannabis sativa	Cannabis sativa L.	Cultivated	Angiosperm	Cannabaceae	Dicot	Bicellular	Dry	NA	Zottini	1996	1	https://link.springer.com/content/pdf/10.1007/BF02318957.pdf	Zottini et al., 1996	0.007	0.17	1.62			1.83
688	Nicotiana tabacum	Nicotiana tabacum L.	Cultivated	Angiosperm	Solanaceae	Dicot	Bicellular	Wet	Starchy and starchless	Doris	1996	1	https://link.springer.com/content/pdf/10.1007/BF01279184.pdf	Doris & Steer, 1996		0.12	1.62
689	Lilium longiflorum cv. Nellie White	Lilium longiflorum Thunb.	Wild	Angiosperm	Liliaceae	Monocot	Bicellular	Wet	Starchless	Miller	1996	1	https://link.springer.com/content/pdf/10.1007/BF01279191.pdf	Miller et al., 1996		0.1	1.6								1								1																15 MES
690	Catharanthus roseus	Catharanthus roseus (L.) G.Don	Cultivated	Angiosperm	Apocynaceae	Dicot	Bicellular	Dry and wet	Starchless	Khan	1997	1	http://www.pakbs.org/pjbot/PDFs/29(2)/PJB29(2)24.pdf	Khan & Khatoon, 1997		0.2
691	Sesamum indicum L.	Sesamum indicum L.	Cultivated	Angiosperm	Pedaliaceae	Dicot	Bicellular	Wet	NA	Pfahler	1997	1	https://link.springer.com/content/pdf/10.1007/s001220050684.pdf	Pfahler et al., 1997	0.004	0.1	1.62			4.24 (4H2O)
692	Banksia menziesii	Banksia menziesii R.Br.	Wild	Angiosperm	Proteaceae	Dicot	Bicellular	Dry	NA	Maguire	1997	1	https://journals.ashs.org/hortsci/view/journals/hortsci/32/5/article-p916.xml	Maguire & Sedgley, 1997	0.01	0.15	1.62			1.83						1.67				0.99
693	Picea abies	Picea abies (L.) H.Karst.	Wild	Gymnosperm	Pinaceae				NA	Slobodnik	1997	1	https://www.researchgate.net/profile/Branko_Slobodnik/publication/325896503_The_pollen_germination_intensity_and_the_length_of_pollen_tubes_of_Picea_abies_L_Karst_from_the_Protected_Landscape_Area_-_Biosphere_Reserve_Polana_Slovenske_Stredohorie_Mts/links/5b2b7cc7aca272821e46001c/The-pollen-germination-intensity-and-the-length-of-pollen-tubes-of-Picea-abies-L-Karst-from-the-Protected-Landscape-Ar…	Slobodnik & Krizo, 1997	0.01	0.1
694	de-exined Nicotiana tabacum	Nicotiana tabacum L.	Cultivated	Angiosperm	Solanaceae	Dicot	Bicellular	Wet	Starchy and starchless	Wang Jin	1997	0	http://apps.webofknowledge.com/full_record.do?product=UA&search_mode=GeneralSearch&qid=7&SID=D369VYS5YoSfMIK3xKA&page=1&doc=9&cacheurlFromRightClick=no	Jin et al., 1997
695	Limonium perezii	Limonium perezii (Stapf) F.T. Hubb.	Wild	Angiosperm	Plumbaginaceae	Dicot	Tricellular	Dry	Starchy	Zhang	1997	1	https://www.tandfonline.com/doi/pdf/10.1080/00173139709362618?needAccess=true	Zhang et al., 1997		0.07	20			6 (4H2O)
696	Pelargonium zonale	Pelargonium zonale (L.) L'HÃ©r. ex Aiton	Wild	Angiosperm	Geraniaceae	Dicot	Tricellular	Dry	Starchy	Nagata	1997	1	https://link.springer.com/content/pdf/10.1007/BF01288031.pdf	Nagata et al., 1997		0.25	1.62								1.81
697	Gossypium	Gossypium	Cultivated	Angiosperm	Malvaceae	Dicot	Bicellular	Dry	Starchy	Liang	1998	0	http://apps.webofknowledge.com/full_record.do?product=UA&search_mode=GeneralSearch&qid=4&SID=E3jSiUvwUPY5cAGwLNL&page=1&doc=1&cacheurlFromRightClick=no	Lian & Li, 1998	0.001	0.45
698	Arabidopsis ecotype Columbia	Arabidopsis	Cultivated	Angiosperm	Brassicaceae	Dicot	Tricellular	Dry	NA	Nakashima	1998	1	http://www.plantphysiol.org/content/plantphysiol/118/4/1233.full.pdf	Nakashima et al., 1998	0.8% Bacto-agar	0.031
699	Zea mays L.	Zea mays L.	Cultivated	Angiosperm	Poaceae	Monocot	Tricellular	Dry	NA	Santos	1998	1	https://academic.oup.com/aob/article/82/5/641/2587908	Santos, 1998	0.6% Bacto-agar	0.154	1620			1470
700	Fraxinus lanuginosa	Fraxinus lanuginosa Koidz.	Wild	Angiosperm	Oleaceae	Dicot	Bicellular	Dry	NA	Ishida	1998	1	https://www.jstor.org/stable/pdf/10.1086/314088.pdf?refreqid=excelsior%3Ab32993d26b0d8aa8e3af14199f495641	Ishida & Hiura, 1998		0.05
701	Nicotiana alata	Nicotiana alata Link & Otto	Wild	Angiosperm	Solanaceae	Dicot	Bicellular	Wet	Starchy and starchless	Lush	1998	1	http://www.plantphysiol.org/content/plantphysiol/118/3/733.full.pdf	Lush et al., 1998	0	0.051	1.6								1	0.8							1																25 MES
702	Petunia hybrida	Petunia hybrida Vilm.	Cultivated	Angiosperm	Solanaceae	Dicot	Bicellular	Wet	Starchy and starchless	Ylstra	1998	1	http://www.plantphysiol.org/content/plantphysiol/118/1/297.full.pdf	Ylstra et al., 1998
703	Boehmeria nivea	Boehmeria nivea (L.) Gaudich.	Cultivated	Angiosperm	Urticaceae	Dicot	Bicellular	Dry	Starchless	Pierozzi	1998	1	https://www.jstage.jst.go.jp/article/cytologia1929/63/2/63_2_213/_pdf	Pierozzi & Benatti, 1998	0.002	0.003
704	Paulownia × taiwaniana	Paulownia taiwaniana T.W. Hu & H.J. Chang	Cultivated	Angiosperm	Paulowniaceae	Dicot	Bicellular	Dry	NA	Ho, Cheng-Kuen	1998	0	http://apps.webofknowledge.com/full_record.do?product=UA&search_mode=GeneralSearch&qid=4&SID=E3jSiUvwUPY5cAGwLNL&page=2&doc=14&cacheurlFromRightClick=no	Ho et al., 1998
705	Amelanchine sinica	Amelanchier sinica (C.K.Schneid.) Chun	Wild	Angiosperm	Rosaceae	Dicot	Bicellular	Wet	Starchy and starchless	Song	1998	1	https://link.springer.com/content/pdf/10.1007/PL00007023.pdf	Song et al., 1998		0.1	1.62																100
706	Cercis chinensis	Cercis chinensis Bunge	Cultivated	Angiosperm	Fabaceae	Dicot	Bicellular	Wet	NA	Song	1998	1	https://link.springer.com/content/pdf/10.1007/PL00007023.pdf	Song et al., 1998		0.1	1.62																100
707	Prunus triloba	Prunus triloba Lindl.	Cultivated	Angiosperm	Rosaceae	Dicot	Bicellular	Wet	Starchy and starchless	Song	1998	1	https://link.springer.com/content/pdf/10.1007/PL00007023.pdf	Song et al., 1998		0.1	1.62																100
708	Sophora japonica L.	Styphnolobium japonicum (L.) Schott	Wild	Angiosperm	Fabaceae	Dicot	Bicellular	Wet	NA	Song	1998	1	https://link.springer.com/content/pdf/10.1007/PL00007023.pdf	Song et al., 1998		0.1	1.62																100
709	Cucumis sativus L.	Cucumis sativus L.	Cultivated	Angiosperm	Cucurbitaceae	Dicot	Bicellular	Dry	Starchy and starchless	Song	1998	1	https://link.springer.com/content/pdf/10.1007/PL00007023.pdf	Song et al., 1998		0.1	1.62																100
710	Betula pendula	Betula pendula Roth	Cultivated	Angiosperm	Betulaceae	Dicot	Bicellular	Dry	Starchy and starchless	Pasonen	1998	1	https://nph.onlinelibrary.wiley.com/doi/epdf/10.1046/j.1469-8137.1998.00135.x	Pasonen & Kapyla, 1998	0.01	0.171	1.62
711	Pseudotsuga menziesii	Pseudotsuga menziesii (Mirb.) Franco	Cultivated	Gymnosperm	Pinaceae				NA	Shirazi	1998	1	https://onlinelibrary.wiley.com/doi/epdf/10.1046/j.1365-3040.1998.00275.x	Shirazi & Muir, 1998		0.1	1.62			1.83						1.67				0.99
712	Ephedra americana	Ephedra americana Humb. & Bonpl. ex Willd.	Wild	Gymnosperm	Ephedraceae				Starchless	El-Ghazaly	1998	1	https://link.springer.com/content/pdf/10.1007/BF00985202.pdf	El-Ghazaly et al., 1998	0	0.1	1.62			1.27						0.81				0.99
713	Cypripedium calceolus	Cypripedium calceolus L.	Wild	Angiosperm	Orchidaceae	Monocot	Bicellular	Wet	Starchless	Light	1998	1	https://watermark.silverchair.com/j.1095-8339.1998.tb02512.x.pdf?token=AQECAHi208BE49Ooan9kkhW_Ercy7Dm3ZL_9Cf3qfKAc485ysgAAAsQwggLABgkqhkiG9w0BBwagggKxMIICrQIBADCCAqYGCSqGSIb3DQEHATAeBglghkgBZQMEAS4wEQQM_HMsCRza0Ij_3yyEAgEQgIICd0dhg7YM5xqUwsaKsGgAGr3oDn_OHtLKQlX-ZeqfQxBdoP0rbluTH37NbqnNoe2zTB5R4SLxWmB31hhJnP1YH3FQM0y5s2iJV4T4X_W95DPRKD63i39YBxjGGqwMfpLpGoc8IBIklG7m0nirKb233BFuXky0gCoB7WuT0RFguK84…	Light & MacConaill, 1998	0	0.171
714	Epipactis helleborine	Epipactis helleborine (L.) Crantz	Wild	Angiosperm	Orchidaceae	Monocot	Bicellular	Wet	Starchless	Light	1998	1	https://watermark.silverchair.com/j.1095-8339.1998.tb02512.x.pdf?token=AQECAHi208BE49Ooan9kkhW_Ercy7Dm3ZL_9Cf3qfKAc485ysgAAAsQwggLABgkqhkiG9w0BBwagggKxMIICrQIBADCCAqYGCSqGSIb3DQEHATAeBglghkgBZQMEAS4wEQQM_HMsCRza0Ij_3yyEAgEQgIICd0dhg7YM5xqUwsaKsGgAGr3oDn_OHtLKQlX-ZeqfQxBdoP0rbluTH37NbqnNoe2zTB5R4SLxWmB31hhJnP1YH3FQM0y5s2iJV4T4X_W95DPRKD63i39YBxjGGqwMfpLpGoc8IBIklG7m0nirKb233BFuXky0gCoB7WuT0RFguK84…	Light & MacConaill, 1998	0	0.103
715	Brassica rapa subsp. pekinensis (Lour.) Kitam.	Brassica rapa L.	Wild	Angiosperm	Brassicaceae	Dicot	Tricellular	Dry	NA	Sato	1998	1	https://link.springer.com/content/pdf/10.1023/A:1018381417657.pdf	Sato et al., 1998	0	0.2
716	Helianthus annuus L.	Helianthus annuus L.	Cultivated	Angiosperm	Asteraceae	Dicot	Tricellular	Dry	NA	Ravikumar	1998	1	https://link.springer.com/content/pdf/10.1023/A:1018359112478.pdf	Ravikumar & Chikkodi, 1998	?
717	Fagopyrum esculentum	Fagopyrum esculentum Moench	Cultivated	Angiosperm	Polygonaceae	Dicot	Tricellular	Dry	Starchy	Adhikari	1998	1	https://link.springer.com/content/pdf/10.1023/A:1018393425407.pdf	Adhikari & Campbell, 1998	0	0.015	0.65			3.24 (4H2O)								1.33		1.98
718	Dacryodes edulis	Dacryodes edulis (G.Don) H.J.Lam	Cultivated	Angiosperm	Burseraceae	Dicot	Bicellular	Wet	NA	Youmbi	1998	1	https://www.tandfonline.com/doi/abs/10.1080/00173139809362648#aHR0cHM6Ly93d3cudGFuZGZvbmxpbmUuY29tL2RvaS9wZGYvMTAuMTA4MC8wMDE3MzEzOTgwOTM2MjY0OD9uZWVkQWNjZXNzPXRydWVAQEAw	Youmbi et al., 1998	0.01	15 or 20%
719	Artemisia annua L.	Artemisia annua L.	Wild	Angiosperm	Asteraceae	Dicot	Tricellular	Dry	NA	Delabays	1998	1	http://apps.webofknowledge.com/full_record.do?product=UA&search_mode=GeneralSearch&qid=4&SID=E3jSiUvwUPY5cAGwLNL&page=4&doc=33&cacheurlFromRightClick=no	Delabays & Obrist, 1998	0.007	0.3	808.67
720	Asparagus officinalis L.	Asparagus officinalis L.	Cultivated	Angiosperm	Asparagaceae	Monocot	Bicellular	Dry	NA	Ozaki	1999	1	https://pdfs.semanticscholar.org/3cc6/5ea060c7d793f2888490baf02cbf45c504dd.pdf?_ga=2.217072918.1229914949.1590993505-218708052.1585738021	Ozaki et al., 1999	0.03	0.3	1.62
721	Typha latifolia L.	Typha latifolia L.	Wild	Angiosperm	Typhaceae	Monocot	Bicellular	Dry	Starchy	Hoekstra	1999	1	https://onlinelibrary.wiley.com/doi/epdf/10.1046/j.1365-3040.1999.00491.x	Hoekstra et al., 1999	0	0.068	1.6			1.3 (4H2O)						0.8 (7H2O)				1																			2 Na- PO₄³⁻ citrate
722	Typha latifolia L.	Typha latifolia L.	Wild	Angiosperm	Typhaceae	Monocot	Bicellular	Dry	Starchy	Hoekstra	1999	1	https://onlinelibrary.wiley.com/doi/epdf/10.1046/j.1365-3040.1999.00491.x	Hoekstra et al., 1999	0.006	0.068	1.6			1.3 (4H2O)						0.8 (7H2O)				1																			2 Na- PO₄³⁻ citrate
723	Annona cherimola Mill.	Annona cherimola Mill.	Cultivated	Angiosperm	Annonaceae	Dicot	Bicellular	Wet	NA	Rosell	1999	1	https://pdf.sciencedirectassets.com/271177/1-s2.0-S0304423800X00441/1-s2.0-S0304423899000126/main.pdf?X-Amz-Security-Token=IQoJb3JpZ2luX2VjENX%2F%2F%2F%2F%2F%2F%2F%2F%2F%2FwEaCXVzLWVhc3QtMSJGMEQCIGn13Ln343WOXAjk3R2xV7wnNLyU1%2FZXky9LfdHfzHDGAiBibJYB2LYSpFCHFEN0axzDT1v1Xkiv2cnSFpSS272DEiq0AwgtEAMaDDA1OTAwMzU0Njg2NSIMx7EC2MqlbGVt1GNjKpEDsEPPAlRwisQijQmB6seHqta2rdVMwZ%2BGtkKt1lRmKD%2BSCSJ74jWFvrOdR%…	Rosell et al., 1999		0.1
724	Annona cherimola Mill.	Annona cherimola Mill.	Cultivated	Angiosperm	Annonaceae	Dicot	Bicellular	Wet	NA	Rosell	1999	1	https://pdf.sciencedirectassets.com/271177/1-s2.0-S0304423800X00441/1-s2.0-S0304423899000126/main.pdf?X-Amz-Security-Token=IQoJb3JpZ2luX2VjENX%2F%2F%2F%2F%2F%2F%2F%2F%2F%2FwEaCXVzLWVhc3QtMSJGMEQCIGn13Ln343WOXAjk3R2xV7wnNLyU1%2FZXky9LfdHfzHDGAiBibJYB2LYSpFCHFEN0axzDT1v1Xkiv2cnSFpSS272DEiq0AwgtEAMaDDA1OTAwMzU0Njg2NSIMx7EC2MqlbGVt1GNjKpEDsEPPAlRwisQijQmB6seHqta2rdVMwZ%2BGtkKt1lRmKD%2BSCSJ74jWFvrOdR%…	Rosell et al., 1999		0.1				1.7 (4H2O)						1.63 (7H2O)
725	Annona cherimola Mill.	Annona cherimola Mill.	Cultivated	Angiosperm	Annonaceae	Dicot	Bicellular	Wet	NA	Rosell	1999	1	https://pdf.sciencedirectassets.com/271177/1-s2.0-S0304423800X00441/1-s2.0-S0304423899000126/main.pdf?X-Amz-Security-Token=IQoJb3JpZ2luX2VjENX%2F%2F%2F%2F%2F%2F%2F%2F%2F%2FwEaCXVzLWVhc3QtMSJGMEQCIGn13Ln343WOXAjk3R2xV7wnNLyU1%2FZXky9LfdHfzHDGAiBibJYB2LYSpFCHFEN0axzDT1v1Xkiv2cnSFpSS272DEiq0AwgtEAMaDDA1OTAwMzU0Njg2NSIMx7EC2MqlbGVt1GNjKpEDsEPPAlRwisQijQmB6seHqta2rdVMwZ%2BGtkKt1lRmKD%2BSCSJ74jWFvrOdR%…	Rosell et al., 1999		0.05
726	Lilium longiflorum	Lilium longiflorum Thunb.	Wild	Angiosperm	Liliaceae	Monocot	Bicellular	Wet	Starchless	Ma	1999	1	http://www.plantcell.org/content/plantcell/11/7/1351.full.pdf	Ma et al., 1999		0.151	1								1	1																							2 Na- PO₄³⁻ citrate
727	Nicotiana alata	Nicotiana alata Link & Otto	Wild	Angiosperm	Solanaceae	Dicot	Bicellular	Wet	Starchy and starchless	Li	1999	1	https://link.springer.com/content/pdf/10.1007/s004250050590.pdf	Li et al., 1999
728	Lycopersicon esculentum Mill.	Lycopersicon esculentum Mill.	Cultivated	Angiosperm	Solanaceae	Dicot	Bicellular	Wet	Starchy and starchless	Song	1999	1	https://pdf.sciencedirectassets.com/271177/1-s2.0-S0304423800X00416/1-s2.0-S0304423898002544/main.pdf?X-Amz-Security-Token=IQoJb3JpZ2luX2VjENX%2F%2F%2F%2F%2F%2F%2F%2F%2F%2FwEaCXVzLWVhc3QtMSJIMEYCIQCkpGSzwtdUXTd3lyrkhXVLghjg7rbOiz21Ju0EadcZiAIhANW4WYjWvWfQhjRrJqPypVt0W58Uu32UnJVP8npjtHGDKrQDCC4QAxoMMDU5MDAzNTQ2ODY1IgyRjAcaMjRfP39oSRQqkQPUNcCYqt5n62w7%2B6p5VFyX6JTJV0rNNDFSP6EBPXMSj3PbRDYDwTuWlY%2FL…	Song et al., 1999	0.01	0.15	0.98
729	Passiflora edulis f. flavicarpa	Passiflora edulis fo. flavicarpa O. Deg.	Wild	Angiosperm	Passifloraceae	Dicot	Bicellular	Dry	NA	Da Silva	1999	1	https://www.scielo.br/pdf/pab/v34n3/8655.pdf	Silva et al., 1999		0.05	3.24			6.1
730	Elaeis guineensis Jacq.	Elaeis guineensis Jacq.	Cultivated	Angiosperm	Arecaceae	Monocot	Bicellular	Dry	NA	Tandon	1999	1	https://pdfs.semanticscholar.org/41eb/176930a15c687cb5797bbf1a585e33e889d7.pdf?_ga=2.96827807.1692808399.1590070850-218708052.1585738021	Tandon et al., 1999		0.025	1.62
731	Alnus glutinosa	Alnus glutinosa (L.) Gaertn.	Wild	Angiosperm	Betulaceae	Dicot	Bicellular	Dry	Starchy and starchless	Steiner	1998	1	https://kf.tuzvo.sk/sites/default/files/FG05-1_047-060.pdf	Steiner & Gregorius, 1998	0.01	0.2	1.62								0.91
732	Alnus glutinosa	Alnus glutinosa (L.) Gaertn.	Wild	Angiosperm	Betulaceae	Dicot	Bicellular	Dry	Starchy and starchless	Steiner	1998	1	https://kf.tuzvo.sk/sites/default/files/FG05-1_047-060.pdf	Steiner & Gregorius, 1998	0.01	0.07	1.62			18.29
733	Alnus incana	Alnus incana (L.) Moench	Wild	Angiosperm	Betulaceae	Dicot	Bicellular	Dry	Starchy and starchless	Steiner	1998	1	https://kf.tuzvo.sk/sites/default/files/FG05-1_047-060.pdf	Steiner & Gregorius, 1998	0.01	0.2	1.62								0.91
734	Alnus incana	Alnus incana (L.) Moench	Wild	Angiosperm	Betulaceae	Dicot	Bicellular	Dry	Starchy and starchless	Steiner	1998	1	https://kf.tuzvo.sk/sites/default/files/FG05-1_047-060.pdf	Steiner & Gregorius, 1998	0.01	0.07	1.62			18.29
735	Ornithogalum virens Lindl.	Albuca virens (Lindl.) J.C.Manning & Goldblatt	Wild	Angiosperm	Asparagaceae	Monocot	Bicellular	Dry	NA	Stepka	1999	1	https://search.proquest.com/openview/6bd0051e76a59a8c9235fd425628180c/1?cbl=2046267&pq-origsite=gscholar	Stępka et al., 1999		0.1	1.62			1.83 (4H2O)						0.82 (7H2O)				0.99
736	Prunus armeniaca L.	Prunus armeniaca L.	Cultivated	Angiosperm	Rosaceae	Dicot	Bicellular	Wet	Starchy and starchless	Andres	1999	0	http://apps.webofknowledge.com/full_record.do?product=UA&search_mode=GeneralSearch&qid=2&SID=C52uPgs5IM6A9sqCHHe&page=3&doc=24&cacheurlFromRightClick=no	Andres et al., 1999	0.01	0.15
737	Cassia siamea Lam.	Senna siamea (Lam.) H.S.Irwin & Barneby.	Cultivated	Angiosperm	Fabaceae	Dicot	Bicellular	Wet	NA	Bhattacharya	1999	0	https://hero.epa.gov/hero/index.cfm/reference/details/reference_id/1343509	Bhattacharya & Mandal, 1999		0.1	3.24
738	Vitis vinifera	Vitis vinifera L.	Cultivated	Angiosperm	Vitaceae	Dicot	Bicellular	Dry	Starchless	Park	1999	1	https://link.springer.com/content/pdf/10.1023/A:1006477422833.pdf	Park, 2004	0.001	0.02	0.17
739	Lycopersicon peruvianum (L.) Mill.	Solanum peruvianum L.	Wild	Angiosperm	Solanaceae	Dicot	Bicellular	Wet	Starchy and starchless	Kim	2001	1	http://web.a.ebscohost.com/ehost/detail/detail?vid=0&sid=ad929547-fefc-4e73-b1a1-d1f488b3b6a6%40sessionmgr4007&bdata=JnNpdGU9ZWhvc3QtbGl2ZQ%3d%3d#db=asn&AN=18630969	Kim et al., 2001		0.02	1.62			2.97 (4H2O)						0.82 (7H2O)				0.99																			20 (KOH) MES
740	Zingiber officinale Roscoe	Zingiber officinale Roscoe	Cultivated	Angiosperm	Zingiberaceae	Monocot	Bicellular	Wet	NA	Adaniya	2001	1	https://reader.elsevier.com/reader/sd/pii/S0304423801002321?token=715723167EB6130FA3766D29236C86743F718211727F1AE6CBDAC4F52777F7CC27F57B651D15BFCC23886AC6398A6692	Adaniya, 2001	0.01	0.08	3.24
741	Arabidopsis thaliana	Arabidopsis thaliana (L.) Heynh.	Cultivated	Angiosperm	Brassicaceae	Dicot	Tricellular	Dry	NA	Fan	2001	1	https://academic.oup.com/jxb/article/52/361/1603/538349	Fan, 2001	0.01	0.166	1.5								10	0.8							1																5 MES
742	Lycopersicon esculentumMill.	Lycopersicon esculentum Mill.	Cultivated	Angiosperm	Solanaceae	Dicot	Bicellular	Wet	Starchy and starchless	Song	2001	1	https://reader.elsevier.com/reader/sd/pii/S0168945201004356?token=60C304247F772E9616092C204B1591CB82F8775AD6E7B20E517EF5A191DF88ED6A92E4707A3C43D2204BC39E8DF8B8A1	Song et al., 2001		0.02	1.6			3 (4H2O)						0.8 (7H2O)				1																			20 MES
743	Momordica charantia L.	Momordica charantia L.	Wild	Angiosperm	Cucurbitaceae	Dicot	Bicellular	Dry	Starchy and starchless	Wang	2001	1	https://link.springer.com/content/pdf/10.1007/s002990100351.pdf	Wang et al., 2001		0.12
744	Bassia latifolia Roxb.	Madhuca longifolia var. latifolia (Roxb.) A.Chev.	Cultivated	Angiosperm	Sapotaceae	Dicot	NA	Dry	NA	Singh	2001	0	http://apps.webofknowledge.com/full_record.do?product=UA&search_mode=GeneralSearch&qid=4&SID=D4GjydIvanvTWwlvc1d&page=1&doc=9&cacheurlFromRightClick=no	Singh & Singh, 2001	0	0.15	3.24
745	Lilium longiflorum Thunb	Lilium longiflorum Thunb.	Wild	Angiosperm	Liliaceae	Monocot	Bicellular	Wet	Starchless	Pertl	2001	1	https://link.springer.com/content/pdf/10.1007/s004250000483.pdf	Pertl et al., 2001		0.1	1.6								0.1								1
746	Nicotiana tabacum L.	Nicotiana tabacum L.	Cultivated	Angiosperm	Solanaceae	Dicot	Bicellular	Wet	Starchy and starchless	Andreyuk	2001	1	https://link.springer.com/content/pdf/10.1023/A:1016630820341.pdf	Andreyuk et al., 2001		0.103	3.2			3						0.8				1
747	Pinus monticola	Pinus monticola Douglas ex D.Don	Wild	Gymnosperm	Pinaceae				NA	Fernando	2001	1	https://link.springer.com/content/pdf/10.1007/s004970100069.pdf	Fernando et al., 2001	0.4% phytagel	0.05	1.62			1.83
748	Cedrus deodara	Cedrus deodara (Roxb. ex D.Don) G.Don	Wild	Gymnosperm	Pinaceae				NA	Fernando	2001	1	https://link.springer.com/content/pdf/10.1007/s004970100069.pdf	Fernando et al., 2001	0.4% phytagel	0.05	1.62			1.83
749	Picea orientalis	Picea orientalis (L.) Peterm.	Cultivated	Gymnosperm	Pinaceae				NA	Fernando	2001	1	https://link.springer.com/content/pdf/10.1007/s004970100069.pdf	Fernando et al., 2001	0.4% phytagel	0.05	1.62			1.83
750	Pinus aristata	Pinus aristata Engelm.	Wild	Gymnosperm	Pinaceae				NA	Fernando	2001	1	https://link.springer.com/content/pdf/10.1007/s004970100069.pdf	Fernando et al., 2001	0.4% phytagel	0.05	1.62			1.83
751	Abies amabilis	Abies amabilis (Douglas ex Loudon) J.Forbes	Wild	Gymnosperm	Pinaceae				NA	Fernando	2001	1	https://link.springer.com/content/pdf/10.1007/s004970100069.pdf	Fernando et al., 2001	0.4% phytagel	0.05	1.62			1.83
752	Picea sitchensis	Picea sitchensis (Bong.) Carrière	Wild	Gymnosperm	Pinaceae				NA	Fernando	2001	1	https://link.springer.com/content/pdf/10.1007/s004970100069.pdf	Fernando et al., 2001	0.4% phytagel	0.05	1.62			1.83
753	Pinus contorta	Pinus contorta Douglas ex Loudon	Wild	Gymnosperm	Pinaceae				NA	Fernando	2001	1	https://link.springer.com/content/pdf/10.1007/s004970100069.pdf	Fernando et al., 2001	0.4% phytagel	0.05	1.62			1.83
754	Pinus griffithii (Hook.f.) Parl.	Larix griffithii Hook.f.	Wild	Gymnosperm	Pinaceae				NA	Fernando	2001	1	https://link.springer.com/content/pdf/10.1007/s004970100069.pdf	Fernando et al., 2001	0.4% phytagel	0.05	1.62			1.83
755	Pinus lambertiana	Pinus lambertiana Douglas	Wild	Gymnosperm	Pinaceae				NA	Fernando	2001	1	https://link.springer.com/content/pdf/10.1007/s004970100069.pdf	Fernando et al., 2001	0.4% phytagel	0.05	1.62			1.83
756	Cajanus cajan	Cajanus cajan (L.) Millsp.	Cultivated	Angiosperm	Fabaceae	Dicot	Bicellular	Wet	NA	Jayaprakash	2001	1	https://watermark.silverchair.com/520851.pdf?token=AQECAHi208BE49Ooan9kkhW_Ercy7Dm3ZL_9Cf3qfKAc485ysgAAApgwggKUBgkqhkiG9w0BBwagggKFMIICgQIBADCCAnoGCSqGSIb3DQEHATAeBglghkgBZQMEAS4wEQQMgOX9d42u4g9O7cVAAgEQgIICS_6zjD0j8_p-4-rRbRCyLQJiP2M8M6_B64wN9zcOWzKIdgG0XIBqEMnnw29fmQ0rImuvtwqNKMmD08GFfWIiLeTWY0yx-3pOHaDd8lNyroLp9OIZs0JBzyLXHl9Epu5H5TCRROyFjsLNzP2nUnd3lj8GgR1JcsoF0GOI12_73wsYBjeSlWgOQMNPnFHbpVfP…	Jayaprakash & Sarla, 2001	0.01	0.375	4.05			1.83						1.67				0.99
757	Allamanda cathartica L.	Allamanda cathartica L.	Wild	Angiosperm	Apocynaceae	Dicot	Bicellular	Dry and wet	Starchless	Sreekala	2001	1	https://www.researchgate.net/profile/AK_Sreekala/publication/293396513_Induced_seed_set_in_Allamanda_cathartica_L/links/57722cd308ae10de639dfae4.pdf	Sreekala et al., 2011		0.05
758	Pyrus serotina Rehder	Pyrus pyrifolia (Burm.f.) Nakai	Cultivated	Angiosperm	Rosaceae	Dicot	Bicellular	Wet	Starchy and starchless	Hiratsuka	2001	1	https://link.springer.com/content/pdf/10.1007/s004970000058.pdf	Hiratsuka et al., 2001	0	0.1	1.62			2.97 (4H2O)						0.82 (7H2O)				0.99																			50 (NaOH) MES
759	Haemanthus katharinae Baker	Scadoxus multiflorus ssp. katherinae (Baker) Friis & Nordal	Cultivated	Angiosperm	Amaryllidaceae	Monocot	Bicellular	Dry	Starchless	Das	2001	1	https://link.springer.com/content/pdf/10.1007/s11738-001-0038-5.pdf	Das & Mishra, 2001	0	0.2	1.62
760	Catharanthus roseus	Catharanthus roseus (L.) G.Don	Cultivated	Angiosperm	Apocynaceae	Dicot	Bicellular	Dry and wet	Starchless	Das	2001	1	https://link.springer.com/content/pdf/10.1007/s11738-001-0038-5.pdf	Das & Mishra, 2001	0	0.2	1.62
761	Nothofagus antarctica	Nothofagus antarctica (G.Forst.) Oerst.	Wild	Angiosperm	Nothofagaceae	Dicot	Bicellular	Dry	NA	Baez	2002	1	https://www.tandfonline.com/doi/abs/10.1080/0028825X.2002.9512822#aHR0cHM6Ly93d3cudGFuZGZvbmxpbmUuY29tL2RvaS9wZGYvMTAuMTA4MC8wMDI4ODI1WC4yMDAyLjk1MTI4MjI/bmVlZEFjY2Vzcz10cnVlQEBAMA==	Báez et al., 2002	0.01	0.1
762	Nothofagus betuloides	Nothofagus betuloides (Mirb.) Oerst.	Wild	Angiosperm	Nothofagaceae	Dicot	Bicellular	Dry	NA	Baez	2002	1	https://www.tandfonline.com/doi/abs/10.1080/0028825X.2002.9512822#aHR0cHM6Ly93d3cudGFuZGZvbmxpbmUuY29tL2RvaS9wZGYvMTAuMTA4MC8wMDI4ODI1WC4yMDAyLjk1MTI4MjI/bmVlZEFjY2Vzcz10cnVlQEBAMA==	Báez et al., 2002	0.01	0.1
763	Nothofagus dombeyi	Nothofagus dombeyi (Mirb.) Oerst.	Wild	Angiosperm	Nothofagaceae	Dicot	Bicellular	Dry	NA	Baez	2002	1	https://www.tandfonline.com/doi/abs/10.1080/0028825X.2002.9512822#aHR0cHM6Ly93d3cudGFuZGZvbmxpbmUuY29tL2RvaS9wZGYvMTAuMTA4MC8wMDI4ODI1WC4yMDAyLjk1MTI4MjI/bmVlZEFjY2Vzcz10cnVlQEBAMA==	Báez et al., 2002	0.01	0.1
764	Nothofagus obliqua	Nothofagus obliqua (Mirb.) Oerst.	Wild	Angiosperm	Nothofagaceae	Dicot	Bicellular	Dry	NA	Baez	2002	1	https://www.tandfonline.com/doi/abs/10.1080/0028825X.2002.9512822#aHR0cHM6Ly93d3cudGFuZGZvbmxpbmUuY29tL2RvaS9wZGYvMTAuMTA4MC8wMDI4ODI1WC4yMDAyLjk1MTI4MjI/bmVlZEFjY2Vzcz10cnVlQEBAMA==	Báez et al., 2002	0.01	0.1
765	Gossypium hirsutum L.	Gossypium hirsutum L.	Cultivated	Angiosperm	Malvaceae	Dicot	Bicellular	Dry	Starchy	Pline	2002	1	https://acsess.onlinelibrary.wiley.com/doi/pdf/10.2135/cropsci2002.2193	Pline et al., 2002	0	0.1	1.62			1.27						0.81				0.99
766	Arachis hypogaea L.	Arachis hypogaea L.	Cultivated	Angiosperm	Fabaceae	Dicot	Bicellular	Wet	NA	Talwar	2002	1	https://www.samviti.com/img/1341/society/publication/ijpp-7-4-004.pdf	Talwar et al., 2002	0.01	0.2	0.97
767	Arabidopsis thaliana	Arabidopsis thaliana (L.) Heynh.	Cultivated	Angiosperm	Brassicaceae	Dicot	Tricellular	Dry	NA	Derksen	2002	1	https://link.springer.com/content/pdf/10.1007/s00497-002-0149-1.pdf	Derksen et al., 2002	0.7% Bacto-Agar	0.2	1.62								4.77 (2H2O)
768	Prunus armeniaca	Prunus armeniaca L.	Cultivated	Angiosperm	Rosaceae	Dicot	Bicellular	Wet	Starchy and starchless	Pirlak	2002	1	https://www.pubhort.org/ejhs/2002/file_1877.pdf	Prlak & Bolat, 2002	0.015	0.15
769	Prunus avium	Prunus avium (L.) L.	Cultivated	Angiosperm	Rosaceae	Dicot	Bicellular	Wet	Starchy and starchless	Pirlak	2002	1	https://www.pubhort.org/ejhs/2002/file_1877.pdf	Prlak & Bolat, 2002	0.015	0.15
770	Delphinium cardinale	Delphinium cardinale Hook.	Wild	Angiosperm	Ranunculaceae	Dicot	Bicellular	Dry	Starchy and starchless	Honda	2002	1	https://link.springer.com/content/pdf/10.1023/A:1019931304742.pdf	Honda et al., 2002	0.01	0.15	0.81
771	Delphinium cashmerianum	Delphinium cashmerianum Royle	Wild	Angiosperm	Ranunculaceae	Dicot	Bicellular	Dry	Starchy and starchless	Honda	2002	1	https://link.springer.com/content/pdf/10.1023/A:1019931304742.pdf	Honda et al., 2002	0.01	0.15	1.62
772	Delphinium grandiflorum	Delphinium grandiflorum L.	Wild	Angiosperm	Ranunculaceae	Dicot	Bicellular	Dry	Starchy and starchless	Honda	2002	1	https://link.springer.com/content/pdf/10.1023/A:1019931304742.pdf	Honda et al., 2002	0.01	0.15	0.81
773	Delphinium nudicaule	Delphinium nudicaule Torr. & A.Gray	Wild	Angiosperm	Ranunculaceae	Dicot	Bicellular	Dry	Starchy and starchless	Honda	2002	1	https://link.springer.com/content/pdf/10.1023/A:1019931304742.pdf	Honda et al., 2002	0.01	0.15	0.81
774	Delphinium tatsienense	Delphinium tatsienense Franch.	Wild	Angiosperm	Ranunculaceae	Dicot	Bicellular	Dry	Starchy and starchless	Honda	2002	1	https://link.springer.com/content/pdf/10.1023/A:1019931304742.pdf	Honda et al., 2002	0.01	0.15	0.81
775	Delphinium pentagynum	Delphinium pentagynum Lam.	Wild	Angiosperm	Ranunculaceae	Dicot	Bicellular	Dry	Starchy and starchless	Honda	2002	1	https://link.springer.com/content/pdf/10.1023/A:1019931304742.pdf	Honda et al., 2002	0.01	0.15	0.81
776	Delphinium ajacis L.	Consolida ajacis (L.) Schur	Wild	Angiosperm	Ranunculaceae	Dicot	Bicellular	Dry	Starchy and starchless	Honda	2002	1	https://link.springer.com/content/pdf/10.1023/A:1019931304742.pdf	Honda et al., 2002	0.01	0.15	0.81
777	Delphinium staphisagria	Delphinium staphisagria L.	Wild	Angiosperm	Ranunculaceae	Dicot	Bicellular	Dry	Starchy and starchless	Honda	2002	1	https://link.springer.com/content/pdf/10.1023/A:1019931304742.pdf	Honda et al., 2002	0.01	0.15	0.81
778	Delphinium × belladonna (Kelway) Bergmans	Delphinium × belladonna (Kelway) Bergmans	Cultivated	Angiosperm	Ranunculaceae	Dicot	Bicellular	Dry	Starchy and starchless	Honda	2002	1	https://link.springer.com/content/pdf/10.1023/A:1019931304742.pdf	Honda et al., 2002	0.01	0.15	0.81
779	Delphinium × hybridum L.	Delphinium × hybridum L.	Cultivated	Angiosperm	Ranunculaceae	Dicot	Bicellular	Dry	Starchy and starchless	Honda	2002	1	https://link.springer.com/content/pdf/10.1023/A:1019931304742.pdf	Honda et al., 2002	0.01	0.15	1.62
780	Nicotiana tabacum	Nicotiana tabacum L.	Cultivated	Angiosperm	Solanaceae	Dicot	Bicellular	Wet	Starchy and starchless	Loguercio	2002	1	https://www.scielo.br/pdf/bjpp/v14n1/11785.pdf	Loguercio, 2002		0.1	1.62			1.27 (4H2O)						0.87 (7H2O)				0.99
781	Vitis vinifera	Vitis vinifera L.	Cultivated	Angiosperm	Vitaceae	Dicot	Bicellular	Dry	Starchless	Park	2002	1	https://link.springer.com/content/pdf/10.1023/A:1019931502788.pdf	Min Park et al., 2002	0.001	0.02	0.17
782	Tetraploid Vitis cultivar	Vitis	Cultivated	Angiosperm	Vitaceae	Dicot	Bicellular	Dry	Starchless	Park	2002	1	https://link.springer.com/content/pdf/10.1023/A:1019931502788.pdf	Min Park et al., 2002	0.001	0.02	0.17
783	diploid Vitis cultivar	Vitis	Cultivated	Angiosperm	Vitaceae	Dicot	Bicellular	Dry	Starchless	Park	2002	1	https://link.springer.com/content/pdf/10.1023/A:1019931502788.pdf	Min Park et al., 2002	0.001	0.02	0.17
784	Vriesea cultivars	Vriesea	Wild	Angiosperm	Bromeliaceae	Monocot	Bicellular	Wet	Starchless	Parton	2002	1	https://link.springer.com/content/pdf/10.1023/A:1015884019619.pdf	Parton et al., 2002	0.005	0.2	0.17
785	Vriesea splendens	Vriesea splendens (Brongn.) Lem.	Wild	Angiosperm	Bromeliaceae	Monocot	Bicellular	Wet	Starchless	Parton	2002	1	https://link.springer.com/content/pdf/10.1023/A:1015884019619.pdf	Parton et al., 2002	0.005	0.2	0.17
786	Guzmania ‘Daniel’	Guzmania	Wild	Angiosperm	Bromeliaceae	Monocot	Bicellular	Wet	Starchless	Parton	2002	1	https://link.springer.com/content/pdf/10.1023/A:1015884019619.pdf	Parton et al., 2002	0.005	0.2	0.17
787	Guzmania lingulata	Guzmania lingulata (L.) Mez	Wild	Angiosperm	Bromeliaceae	Monocot	Bicellular	Wet	Starchless	Parton	2002	1	https://link.springer.com/content/pdf/10.1023/A:1015884019619.pdf	Parton et al., 2002	0.005	0.2	0.17
788	Tillandsia cyanea	Tillandsia cyanea Linden ex K.Koch	Wild	Angiosperm	Bromeliaceae	Monocot	Bicellular	Wet	Starchless	Parton	2002	1	https://link.springer.com/content/pdf/10.1023/A:1015884019619.pdf	Parton et al., 2002	0.005	0.2	0.17
789	Aechmea fasciata	Aechmea fasciata (Lindl.) Baker	Wild	Angiosperm	Bromeliaceae	Monocot	Bicellular	Wet	Starchless	Parton	2002	1	https://link.springer.com/content/pdf/10.1023/A:1015884019619.pdf	Parton et al., 2002	0.005	0.2	0.17
790	Aechmea chantinii	Aechmea chantinii (Carrière) Baker	Wild	Angiosperm	Bromeliaceae	Monocot	Bicellular	Wet	Starchless	Parton	2002	1	https://link.springer.com/content/pdf/10.1023/A:1015884019619.pdf	Parton et al., 2002	0.005	0.2	0.17
791	Pitcairnia herdee	Pitcairnia heerdeae E.Gross & Rauh	Wild	Angiosperm	Bromeliaceae	Monocot	Bicellular	Wet	Starchless	Parton	2002	1	https://link.springer.com/content/pdf/10.1023/A:1015884019619.pdf	Parton et al., 2002	0.005	0.2	0.17
792	Prunus persica	Prunus persica (L.) Batsch	Cultivated	Angiosperm	Rosaceae	Dicot	Bicellular	Wet	Starchy and starchless	Rawat	2003	0	http://apps.webofknowledge.com/full_record.do?product=UA&search_mode=GeneralSearch&qid=2&SID=C2l41RwrQ8YJQEkw8JD&page=1&doc=2&cacheurlFromRightClick=no	Rawat et al., 2003		0.1	0.09
793	Onobrychis viciifolia Scop.	Onobrychis viciifolia Scop.	Cultivated	Angiosperm	Fabaceae	Dicot	Bicellular	Wet	NA	Sancak	2003	0	https://apps.webofknowledge.com/full_record.do?product=UA&search_mode=GeneralSearch&qid=7&SID=C66dfoVLyGk54RlTwL6&page=1&doc=3&cacheurlFromRightClick=no	Sancak et al., 2003		0.1	2.43			0.92						1.25				1.98
794	Agrostis stolonifera L.	Agrostis stolonifera L.	Cultivated	Angiosperm	Poaceae	Monocot	Tricellular	Dry	NA	Fei	2003	1	https://acsess.onlinelibrary.wiley.com/doi/pdf/10.2135/cropsci2003.2177	Fei & Nelson, 2003	0.3% (phytogel)	0.342	1000								2
795	Zea mays L.	Zea mays L.	Cultivated	Angiosperm	Poaceae	Monocot	Tricellular	Dry	NA	Suen	2003	1	https://www.jbc.org/content/278/44/43672.full.pdf	Suen et al., 2003	0	0.15	0.17			0.61																										0.01% lysine, 0.01% cystine, 0.01% glutamic acid
796	Argania spinosa L.	Argania spinosa (L.) Skeels	Cultivated	Angiosperm	Sapotaceae	Dicot	NA	Dry	NA	Benlahbil	2003	1	https://www.tandfonline.com/doi/pdf/10.1080/12538078.2003.10515421?needAccess=true	Benlahbil & Bani-Aameur, 2003	0.01	0.2	1.22								1.81
797	Nicotiana tabacum	Nicotiana tabacum L.	Cultivated	Angiosperm	Solanaceae	Dicot	Bicellular	Wet	Starchy and starchless	Sun	2003	1	https://onlinelibrary.wiley.com/doi/epdf/10.1046/j.1365-3040.2003.01021.x	Sun et al., 2003		0.1	1.6									0.8 (4H2O)				1																			20 (NaOH) MES
798	Prunus perscia	Prunus persica (L.) Batsch	Cultivated	Angiosperm	Rosaceae	Dicot	Bicellular	Wet	Starchy and starchless	Sun	2003	1	https://onlinelibrary.wiley.com/doi/epdf/10.1046/j.1365-3040.2003.01021.x	Sun et al., 2003		0.1	1.6									0.8 (4H2O)				1																			20 (NaOH) MES
799	Actinidia deliciosa	Actinidia deliciosa (A.Chev.) C.F.Liang & A.R.Ferguson	Cultivated	Angiosperm	Actinidiaceae	Dicot	Bicellular	Dry	NA	Calzoni	2003	1	https://www.liebertpub.com/doi/pdf/10.1089/10755530360623338	Calzoni et al., 2003	0	0.099	0.4			1
800	Picea meyeri	Picea meyeri Rehder & E.H.Wilson	Cultivated	Gymnosperm	Pinaceae				NA	Wang	2003	1	https://watermark.silverchair.com/23-5-345.pdf?token=AQECAHi208BE49Ooan9kkhW_Ercy7Dm3ZL_9Cf3qfKAc485ysgAAAqEwggKdBgkqhkiG9w0BBwagggKOMIICigIBADCCAoMGCSqGSIb3DQEHATAeBglghkgBZQMEAS4wEQQM9AH6MkQacdTtomWSAgEQgIICVATWrKbqSWc-Ur-wmVmMiXvJ4rWXe0xgAgLkgIIYZn4gXcAT1xnCdHIA2NrPAbJAsI2gplfK4chAR2tO0xqEYlRO5B4pcUwaR9lY8fBlPnI7yQaV9d7Dh6xOyH1TdIAe91AiB3X7h-ehQPwGrEBAAjHSpk4nMexIxFrnxV1gsjPBeqp0iVXI07SlbIigM3…	Wang et al., 2003		0.12	1.62
801	Arabidopsis thaliana	Arabidopsis thaliana (L.) Heynh.	Cultivated	Angiosperm	Brassicaceae	Dicot	Tricellular	Dry	NA	Schreiber	2003	1	https://link.springer.com/content/pdf/10.1007/BF02773394.pdf	Schreiber & Dresselhaus, 2003	0.003	0.1	0.81								10							0.05
802	Arachis hypogaea L.	Arachis hypogaea L.	Cultivated	Angiosperm	Fabaceae	Dicot	Bicellular	Wet	NA	Schreiber	2003	1	https://link.springer.com/content/pdf/10.1007/BF02773394.pdf	Schreiber & Dresselhaus, 2003	0.003	0.1	0.81								10							0.05
803	Columnea oesterdiana	Columnea oerstediana Klotzsch ex Oerst.	Wild	Angiosperm	Gesneriaceae	Dicot	Bicellular	Dry	Starchless	Schreiber	2003	1	https://link.springer.com/content/pdf/10.1007/BF02773394.pdf	Schreiber & Dresselhaus, 2003	0.003	0.1	0.81								10							0.05
804	Nicotiana tabacum	Nicotiana tabacum L.	Cultivated	Angiosperm	Solanaceae	Dicot	Bicellular	Wet	Starchy and starchless	Schreiber	2003	1	https://link.springer.com/content/pdf/10.1007/BF02773394.pdf	Schreiber & Dresselhaus, 2003	0.003	0.1	0.81								10							0.05
805	Pennisetum americanum (L.) Leeke	Pennisetum glaucum (L.) R.Br.	Wild	Angiosperm	Poaceae	Monocot	Tricellular	Dry	NA	Schreiber	2003	1	https://link.springer.com/content/pdf/10.1007/BF02773394.pdf	Schreiber & Dresselhaus, 2003	0.003	0.1	0.81								10							0.05
806	Solanum lycopersicum	Solanum lycopersicum L.	Cultivated	Angiosperm	Solanaceae	Dicot	Bicellular	Wet	Starchy and starchless	Schreiber	2003	1	https://link.springer.com/content/pdf/10.1007/BF02773394.pdf	Schreiber & Dresselhaus, 2003	0.003	0.1	0.81								10							0.05
807	Solanum tuberosum L.	Solanum tuberosum L.	Cultivated	Angiosperm	Solanaceae	Dicot	Bicellular	Wet	Starchy and starchless	Schreiber	2003	1	https://link.springer.com/content/pdf/10.1007/BF02773394.pdf	Schreiber & Dresselhaus, 2003	0.003	0.1	0.81								10							0.05
808	Tradescantia species	Tradescantia	Wild	Angiosperm	Commelinaceae	Monocot	Bicellular	Dry	Starchless	Schreiber	2003	1	https://link.springer.com/content/pdf/10.1007/BF02773394.pdf	Schreiber & Dresselhaus, 2003	0.003	0.1	0.81								10							0.05
809	Zea mays L.	Zea mays L.	Cultivated	Angiosperm	Poaceae	Monocot	Tricellular	Dry	NA	Schreiber	2003	1	https://link.springer.com/content/pdf/10.1007/BF02773394.pdf	Schreiber & Dresselhaus, 2003	0.003	0.1	0.81								10							0.05
810	Phaseolus vulgaris	Phaseolus vulgaris L.	Cultivated	Angiosperm	Fabaceae	Dicot	Bicellular	Wet	NA	Schreiber	2003	1	https://link.springer.com/content/pdf/10.1007/BF02773394.pdf	Schreiber & Dresselhaus, 2003	0.003	0.1	0.81								10							0.05
811	Pisum sativum L.	Pisum sativum L.	Cultivated	Angiosperm	Fabaceae	Dicot	Bicellular	Wet	NA	Schreiber	2003	1	https://link.springer.com/content/pdf/10.1007/BF02773394.pdf	Schreiber & Dresselhaus, 2003	0.003	0.1	0.81								10							0.05
812	Vicia faba	Vicia faba L.	Cultivated	Angiosperm	Fabaceae	Dicot	Bicellular	Wet	NA	Schreiber	2003	1	https://link.springer.com/content/pdf/10.1007/BF02773394.pdf	Schreiber & Dresselhaus, 2003	0.003	0.1	0.81								10							0.05
813	Olea europaea	Olea europaea L.	Cultivated	Angiosperm	Oleaceae	Dicot	Bicellular	Dry	NA	Rodriguez-Garcia	2003	1	https://link.springer.com/content/pdf/10.1007/s00709-002-0076-x.pdf	Rodríguez-García et al., 2003	0	0.1	1.62			1.27						0.81				0.99
814	Vitis vinifera L.	Vitis vinifera L.	Cultivated	Angiosperm	Vitaceae	Dicot	Bicellular	Dry	Starchless	Kelen	2003	1	https://link.springer.com/content/pdf/10.1007/s11738-003-0002-7.pdf	Kelen & Demirtas, 2003	0.01	0.15
815	Borago officinalis L.	Borago officinalis L.	Cultivated	Angiosperm	Boraginaceae	Dicot	Tricellular	Dry	Starchless	Montaner	2003	1	https://www.tandfonline.com/doi/pdf/10.1080/00173130310008553?needAccess=true	Montaner, 2003	0	0.2	1.62			1.5 (4H2O)
816	Actinidia deliciosa	Actinidia deliciosa (A.Chev.) C.F.Liang & A.R.Ferguson	Cultivated	Angiosperm	Actinidiaceae	Dicot	Bicellular	Dry	NA	Abreu	2004	1	https://link.springer.com/content/pdf/10.1007/s00709-004-0049-3.pdf	Abreu & Oliveira, 2004		0.14	3			1.7
817	Citrus sinensis	Citrus sinensis (L.) Osbeck	Cultivated	Angiosperm	Rutaceae	Dicot	Bicellular	Wet	Starchy and starchless	Pio, Leila Aparecida Salles	2004	1	https://www.scielo.br/pdf/cagro/v28n5/v28n5a16.pdf	Pio et al., 2004	0.01	0.1	3.24			4.88
818	Parietaria judaica L.	Parietaria judaica L.	Wild	Angiosperm	Urticaceae	Dicot	Bicellular	Dry	Starchless	Vega-Maray	2004	1	https://www.researchgate.net/publication/223102331_Lipid_transfer_proteins_in_Parietaria_judaica_L_pollen_grains_Immunocytochemical_localization_and_function	Vega-Maray et al., 2004	0.007
819	Impatiens diversifolia	Impatiens diversifolia B.Heyne ex Wight & Arn.	Wild	Angiosperm	Balsaminaceae	Dicot	Bicellular	Wet	Starchy	Sreekala	2004	1	https://zoosprint.zooreach.org/ZooPrintJournal/2004/September/1606-1608.pdf	Sreekala & Pandurangan, 2004		0.2	2.43
820	Impatiens fruticosa	Impatiens fruticosa Lesch. ex DC.	Wild	Angiosperm	Balsaminaceae	Dicot	Bicellular	Wet	Starchy	Sreekala	2004	1	https://zoosprint.zooreach.org/ZooPrintJournal/2004/September/1606-1608.pdf	Sreekala & Pandurangan, 2004		0.2	2.43
821	Impatiens trichocarpa H. Perrier	Impatiens delabathiana Eb. Fisch. & Raheliv.	Wild	Angiosperm	Balsaminaceae	Dicot	Bicellular	Wet	Starchy	Sreekala	2004	1	https://zoosprint.zooreach.org/ZooPrintJournal/2004/September/1606-1608.pdf	Sreekala & Pandurangan, 2004		0.2	2.43
822	Impatiens verticillata	Impatiens verticillata Wight	Wild	Angiosperm	Balsaminaceae	Dicot	Bicellular	Wet	Starchy	Sreekala	2004	1	https://zoosprint.zooreach.org/ZooPrintJournal/2004/September/1606-1608.pdf	Sreekala & Pandurangan, 2004		0.2	2.43
823	Canarium schweinfurthii	Canarium schweinfurthii Engl.	Wild	Angiosperm	Burseraceae	Dicot	Bicellular	Wet	NA	Youmbi	2004	1	https://www.jstor.org/stable/pdf/23616614.pdf?refreqid=excelsior%3A6730f8fb90b965eda096fe4d2d6139a4	Youmbi et al., 2004	0.01	0.1
824	Canarium schweinfurthii	Canarium schweinfurthii Engl.	Wild	Angiosperm	Burseraceae	Dicot	Bicellular	Wet	NA	Youmbi	2004	1	https://www.jstor.org/stable/pdf/23616614.pdf?refreqid=excelsior%3A6730f8fb90b965eda096fe4d2d6139a4	Youmbi et al., 2004	0.01	0.1
825	Oryza meyeriana	Oryza meyeriana (Zoll. & Moritzi) Baill.	Wild	Angiosperm	Poaceae	Monocot	Tricellular	Dry	NA	Bokolial	2004	1	https://www.researchgate.net/publication/324676770_Studies_on_morphology_and_physiology_of_pollen_grains_of_wild_rice-_Oryza_meyeriana_Baill	Bokolial & Borah, 2004	0	0.2	3.24
826	Oryza sativa	Oryza sativa L.	Cultivated	Angiosperm	Poaceae	Monocot	Tricellular	Dry	NA	Bokolial	2004	1	https://www.researchgate.net/publication/324676770_Studies_on_morphology_and_physiology_of_pollen_grains_of_wild_rice-_Oryza_meyeriana_Baill	Bokolial & Borah, 2004	0	0.2	3.24
827	Festuca arundinacea	Festuca arundinacea Schreb.	Cultivated	Angiosperm	Poaceae	Monocot	Tricellular	Dry	NA	Wang	2004	1	https://bsapubs.onlinelibrary.wiley.com/doi/epdf/10.3732/ajb.91.4.523	Wang et al., 2004	0.01	0.274	1.28			1.27
828	Lolium perenne L.	Lolium perenne L.	Wild	Angiosperm	Poaceae	Monocot	Tricellular	Dry	NA	Wang	2004	1	https://bsapubs.onlinelibrary.wiley.com/doi/epdf/10.3732/ajb.91.4.523	Wang et al., 2004	0.01	0.274	1.28			1.27
829	Lolium multiﬂorum Lam.	Lolium multiflorum Lam.	Wild	Angiosperm	Poaceae	Monocot	Tricellular	Dry	NA	Wang	2004	1	https://bsapubs.onlinelibrary.wiley.com/doi/epdf/10.3732/ajb.91.4.523	Wang et al., 2004	0.01	0.274	1.28			1.27
830	Festuca pratensis Huds.	Festuca pratensis Huds.	Wild	Angiosperm	Poaceae	Monocot	Tricellular	Dry	NA	Wang	2004	1	https://bsapubs.onlinelibrary.wiley.com/doi/epdf/10.3732/ajb.91.4.523	Wang et al., 2004	0.01	0.274	1.28			1.27
831	Conospermum amoenum Meisn. subsp. amoenum	Conospermum amoenum Meisn.	Wild	Angiosperm	Proteaceae	Dicot	Bicellular	Dry	NA	Stone	2004	1	https://academic.oup.com/aob/article/93/4/369/196544	Stone et al., 2004	0	0.3	10								30 (H2O)
832	Conospermum spectabile	Conospermum spectabile E.M.Benn.	Wild	Angiosperm	Proteaceae	Dicot	Bicellular	Dry	NA	Stone	2004	1	https://academic.oup.com/aob/article/93/4/369/196544	Stone et al., 2004	0	0.3	10								30 (H2O)
833	Conospermum eatoniae	Conospermum eatoniae Pritz. ex Diels & Pritz.	Wild	Angiosperm	Proteaceae	Dicot	Bicellular	Dry	NA	Stone	2004	1	https://academic.oup.com/aob/article/93/4/369/196544	Stone et al., 2004	0	0.3	10								30 (H2O)
834	Conospermum caeruleum R. Br. subsp caeruleum	Conospermum caeruleum R.Br.	Wild	Angiosperm	Proteaceae	Dicot	Bicellular	Dry	NA	Stone	2004	1	https://academic.oup.com/aob/article/93/4/369/196544	Stone et al., 2004	0	0.3	10								30 (H2O)
835	Conospermum brownii	Conospermum brownii Meisn.	Wild	Angiosperm	Proteaceae	Dicot	Bicellular	Dry	NA	Stone	2004	1	https://academic.oup.com/aob/article/93/4/369/196544	Stone et al., 2004	0	0.3	10								30 (H2O)
836	Conospermum incurvum	Conospermum incurvum Lindl.	Wild	Angiosperm	Proteaceae	Dicot	Bicellular	Dry	NA	Stone	2004	1	https://academic.oup.com/aob/article/93/4/369/196544	Stone et al., 2004	0	0.3	10								30 (H2O)
837	Pentaphylloides fruticosa (L.) O.Schwarz	Dasiphora fruticosa (L.) Rydb.	Cultivated	Angiosperm	Rosaceae	Dicot	Bicellular	Wet	Starchy and starchless	Godin	2004	1	https://www.researchgate.net/publication/260282079_Biological_characters_of_Pentaphylloides_fruticosa_Rosaceae_pollen_in_the_context_of_sex_differentiation	Godin et al., 2004	0.01	0.15
838	Caladium × hortulanum	Caladium × hortulanum Birdsey	Cultivated	Angiosperm	Araceae	Monocot	Mixed	Dry and wet	Starchy and starchless	Deng	2004	1	https://journals.ashs.org/hortsci/view/journals/hortsci/39/2/article-p365.xml	Deng & Harbaugh, 2004	0.01	0.05	1.62
839	Gossypium hirsutum L.	Gossypium hirsutum L.	Cultivated	Angiosperm	Malvaceae	Dicot	Bicellular	Dry	Starchy	Burke	2004	1	https://acsess.onlinelibrary.wiley.com/doi/epdf/10.2134/agronj2004.3590	Burke et al., 2004	0.1	0.25	1.66									0.42 (7H2O)		3.06		0.52
840	Gossypium barbadense L.	Gossypium barbadense L.	Cultivated	Angiosperm	Malvaceae	Dicot	Bicellular	Dry	Starchy	Burke	2004	1	https://acsess.onlinelibrary.wiley.com/doi/epdf/10.2134/agronj2004.3590	Burke et al., 2004	0.1	0.25	1.66									0.42 (7H2O)		3.06		0.52
841	Tecoma stans L.	Tecoma stans (L.) Juss. ex Kunth	Wild	Angiosperm	Bignoniaceae	Dicot	Bicellular	Wet	Starchy and starchless	Chauhan	2004	1	http://nopr.niscair.res.in/bitstream/123456789/23359/1/IJEB%2042%282%29%20197-201.pdf	Chauhan et al., 2004	0	0.1	1.62
842	Cucumis sativus L.	Cucumis sativus L.	Cultivated	Angiosperm	Cucurbitaceae	Dicot	Bicellular	Dry	Starchy and starchless	Vizintin	2004	1	https://www.researchgate.net/profile/Borut_Bohanec/publication/238772958_In_vitro_manipulation_of_cucumber_Cucumis_sativus_L_pollen_and_microspores_Isolation_procedures_viability_tests_germination_maturation/links/0deec539054f555b57000000/In-vitro-manipulation-of-cucumber-Cucumis-sativus-L-pollen-and-microspores-Isolation-procedures-viability-tests-germination-maturation.pdf	Vizintin & Bohanec,2004		15%(maltose)	0.01			1
843	Theobroma grandiflorum	Theobroma grandiflorum (Willd. ex Spreng.) K.Schum.	Cultivated	Angiosperm	Malvaceae	Dicot	Bicellular	Dry	Starchy	Antonio	2004	1	https://ainfo.cnptia.embrapa.br/digital/bitstream/item/147315/1/Cientifica.pdf	Antonia, 2004	0.01	5% lactose	1.62
844	Moringa oleifera	Moringa oleifera Lam.	Cultivated	Angiosperm	Moringaceae	Dicot	Bicellular	Dry	NA	Bhattacharya	2004	1	https://www.tandfonline.com/doi/full/10.1080/00173134.2004.11877463#aHR0cHM6Ly93d3cudGFuZGZvbmxpbmUuY29tL2RvaS9wZGYvMTAuMTA4MC8wMDE3MzEzNC4yMDA0LjExODc3NDYzP25lZWRBY2Nlc3M9dHJ1ZUBAQDA=	Bhattacharya & Mandal, 2004		0.1	3.24
845	Ecballium elaterium	Ecballium elaterium (L.) A.Rich.	Wild	Angiosperm	Cucurbitaceae	Dicot	Bicellular	Dry	Starchy and starchless	Dane	2004	1	https://pdfs.semanticscholar.org/7d58/cdd44902cda9727159e161d624411fef0801.pdf	Dane et al., 2004	0	0.1	1.62
846	Linaria vulgaris	Linaria vulgaris Mill.	Wild	Angiosperm	Plantaginaceae	Dicot	Bicellular	Dry	Starchy	Dane	2004	1	https://pdfs.semanticscholar.org/7d58/cdd44902cda9727159e161d624411fef0801.pdf	Dane et al., 2004	0	0.1	1.62
847	Cyclamen hederifolium	Cyclamen hederifolium Aiton	Wild	Angiosperm	Primulaceae	Dicot	Bicellular	Dry	Starchless	Dane	2004	1	https://pdfs.semanticscholar.org/7d58/cdd44902cda9727159e161d624411fef0801.pdf	Dane et al., 2004	0	0.1	1.62
848	Lonicera fragrantissima	Lonicera fragrantissima Lindl. & J. Paxton	Wild	Angiosperm	Caprifoliaceae	Dicot	Tricellular	Wet	Starchy	Dane	2004	1	https://pdfs.semanticscholar.org/7d58/cdd44902cda9727159e161d624411fef0801.pdf	Dane et al., 2004	0	0.1	1.62
849	Antirrhinum majus	Antirrhinum majus L.	Wild	Angiosperm	Plantaginaceae	Dicot	Bicellular	Dry	Starchy	Dane	2004	1	https://pdfs.semanticscholar.org/7d58/cdd44902cda9727159e161d624411fef0801.pdf	Dane et al., 2004	0	0.1	1.62
850	Zea mays L.	Zea mays L.	Cultivated	Angiosperm	Poaceae	Monocot	Tricellular	Dry	NA	Geetha	2004	1	https://pdfs.semanticscholar.org/37b8/554b684265fbc836e9aa4eaf316833408c47.pdf	Geetha & Jayaraman, 2004	0	1	1617.34
851	Eustoma russellianum G.Don	Eustoma grandiflorum (Raf.) Shinners	Wild	Angiosperm	Gentianaceae	Dicot	Tricellular	Wet	NA	Sung	2004	1	http://koreascience.or.kr/article/JAKO200430710425273.page	Sung et al., 2004		0.15	1.6			1.8
852	Petunia hybrida	Petunia hybrida Vilm.	Cultivated	Angiosperm	Solanaceae	Dicot	Bicellular	Wet	Starchy and starchless	Iwano	2004	1	https://academic.oup.com/pcp/article/45/1/40/1889267	Iwano et al., 2004		0.02	1.62			4.27						1.67				0.99																			20 MES
853	Nicotiana tabacum	Nicotiana tabacum L.	Cultivated	Angiosperm	Solanaceae	Dicot	Bicellular	Wet	Starchy and starchless	Iwano	2004	1	https://academic.oup.com/pcp/article/45/1/40/1889267	Iwano et al., 2004		0.02	1.62			4.27						1.67				0.99																			20 MES
854	Platanus acerifolia	Platanus acerifolia (Aiton) Willd.	Wild	Angiosperm	Platanaceae	Dicot	Bicellular	Dry	Starchless	Suarez-Cervera	2005	1	https://link.springer.com/article/10.1007%2Fs00497-005-0002-4	Suárez-Cervera et al., 2005	0.007	0.12	1.62								2.71
855	Zea mays L.	Zea mays L.	Cultivated	Angiosperm	Poaceae	Monocot	Tricellular	Dry	NA	García-Hernández	2005	1	https://www.scielo.br/pdf/bjpp/v17n4/a05v17n4.pdf	García-Hernández & López, 2005		0.18	1								2
856	Nicotiana tabacum	Nicotiana tabacum L.	Cultivated	Angiosperm	Solanaceae	Dicot	Bicellular	Wet	Starchy and starchless	García-Hernández	2005	1	https://www.scielo.br/pdf/bjpp/v17n4/a05v17n4.pdf	García-Hernández & López, 2005		0.18	1.6								2
857	Impatiens sp.	Impatiens sp.	Wild	Angiosperm	Balsaminaceae	Dicot	Bicellular	Wet	Starchy	García-Hernández	2005	1	https://www.scielo.br/pdf/bjpp/v17n4/a05v17n4.pdf	García-Hernández & López, 2005		0.18	0.5								2
858	Lilium longiflorum	Lilium longiflorum Thunb.	Wild	Angiosperm	Liliaceae	Monocot	Bicellular	Wet	Starchless	García-Hernández	2005	1	https://www.scielo.br/pdf/bjpp/v17n4/a05v17n4.pdf	García-Hernández & López, 2005		0.18	0.17								2
859	Pinus sp.	Pinus sp.	Wild	Gymnosperm	Pinaceae				NA	García-Hernández	2005	1	https://www.scielo.br/pdf/bjpp/v17n4/a05v17n4.pdf	García-Hernández & López, 2005		0.18	1.66								2
860	Cynara scolymus L.	Cynara scolymus L.	Cultivated	Angiosperm	Asteraceae	Dicot	Tricellular	Dry	NA	Bal	2005	1	http://www.pubhort.org/ejhs/2005/file_22636.pdf	Bal & Abak, 2005		0.342	1.63			1.27 (4H2O)					0.45					1
861	Citrus maxima	Citrus maxima (Burm.) Merr.	Cultivated	Angiosperm	Rutaceae	Dicot	Bicellular	Wet	Starchy and starchless	Ateyyeh	2005	1	https://www.researchgate.net/profile/Ahmad_F_Ateyyeh/publication/272353503_Improving_in_vitro_Pollen_Germination_of_Five_Species_of_Fruit_Trees/links/54e27bad0cf2966637969dda.pdf	Ateyyeh, 2005	0.008	0.2
862	Citrus paradisi	Citrus paradisi Macfad.	Cultivated	Angiosperm	Rutaceae	Dicot	Bicellular	Wet	Starchy and starchless	Ateyyeh	2005	1	https://www.researchgate.net/profile/Ahmad_F_Ateyyeh/publication/272353503_Improving_in_vitro_Pollen_Germination_of_Five_Species_of_Fruit_Trees/links/54e27bad0cf2966637969dda.pdf	Ateyyeh, 2005	0.005	0.2
863	Olea europaea	Olea europaea L.	Cultivated	Angiosperm	Oleaceae	Dicot	Bicellular	Dry	NA	Ateyyeh	2005	1	https://www.researchgate.net/profile/Ahmad_F_Ateyyeh/publication/272353503_Improving_in_vitro_Pollen_Germination_of_Five_Species_of_Fruit_Trees/links/54e27bad0cf2966637969dda.pdf	Ateyyeh, 2005	0.008	0.1
864	Prunus domestica	Prunus domestica L.	Cultivated	Angiosperm	Rosaceae	Dicot	Bicellular	Wet	Starchy and starchless	Ateyyeh	2005	1	https://www.researchgate.net/profile/Ahmad_F_Ateyyeh/publication/272353503_Improving_in_vitro_Pollen_Germination_of_Five_Species_of_Fruit_Trees/links/54e27bad0cf2966637969dda.pdf	Ateyyeh, 2005	0.008	0.1	0.81
865	Prunus persica	Prunus persica (L.) Batsch	Cultivated	Angiosperm	Rosaceae	Dicot	Bicellular	Wet	Starchy and starchless	Ateyyeh	2005	1	https://www.researchgate.net/profile/Ahmad_F_Ateyyeh/publication/272353503_Improving_in_vitro_Pollen_Germination_of_Five_Species_of_Fruit_Trees/links/54e27bad0cf2966637969dda.pdf	Ateyyeh, 2005	0.008	0.1	1.62
866	Aechmea fasciata	Aechmea fasciata (Lindl.) Baker	Wild	Angiosperm	Bromeliaceae	Monocot	Bicellular	Wet	Starchless	Vervaeke	2005	1	https://link.springer.com/content/pdf/10.1007/s11240-004-2726-5.pdf	Vervaeke et al., 2005	0.005																															0.02% Arginine
867	Pyrus pyrifolia	Pyrus pyrifolia (Burm.f.) Nakai	Cultivated	Angiosperm	Rosaceae	Dicot	Bicellular	Wet	Starchy and starchless	Zhang Shao-Ling	2005	0	https://europepmc.org/article/cba/480619	Zhang et al., 2005		0.1	1.62								2.05 (2H2O)																								30 MES
868	Pyrus pyrifolia	Pyrus pyrifolia (Burm.f.) Nakai	Cultivated	Angiosperm	Rosaceae	Dicot	Bicellular	Wet	Starchy and starchless	Zhang Shao-Ling	2005	0	https://europepmc.org/article/cba/480619	Zhang et al., 2005		0.05	1.62								2.05 (2H2O)																								30 MES
869	Helianthus annuus L.	Helianthus annuus L.	Cultivated	Angiosperm	Asteraceae	Dicot	Tricellular	Dry	NA	Popielarska	2005	1	https://www.researchgate.net/profile/Marzena_Popielarska-Konieczna/publication/239529900_In_vitro_pollination_of_isolated_ovules_of_sunflower_Helianthus_annuus_L/links/0a85e53b32e6f84a91000000/In-vitro-pollination-of-isolated-ovules-of-sunflower-Helianthus-annuus-L.pdf	Popielarska, 2005	2% agar and gelatine	0.03
870	Pinus halepensis	Pinus halepensis Mill.	Wild	Gymnosperm	Pinaceae				NA	Madmony	2005	1	https://link.springer.com/content/pdf/10.1007/BF02931568.pdf	Madmony et al., 2005	0
871	Pinus brutia	Pinus brutia Ten.	Wild	Gymnosperm	Pinaceae				NA	Madmony	2005	1	https://link.springer.com/content/pdf/10.1007/BF02931568.pdf	Madmony et al., 2005	0
872	Pinus pinea L.	Pinus pinea L.	Wild	Gymnosperm	Pinaceae				NA	Madmony	2005	1	https://link.springer.com/content/pdf/10.1007/BF02931568.pdf	Madmony et al., 2005	0
873	Pinus canariensis	Pinus canariensis C.Sm.	Wild	Gymnosperm	Pinaceae				NA	Madmony	2005	1	https://link.springer.com/content/pdf/10.1007/BF02931568.pdf	Madmony et al., 2005	0
874	Pinus maritima Mill.	Pinus halepensis Mill.	Wild	Gymnosperm	Pinaceae				NA	Madmony	2005	1	https://link.springer.com/content/pdf/10.1007/BF02931568.pdf	Madmony et al., 2005	0
875	Pinus eldarica Medw.	Pinus brutia var. eldarica (Medw.) Silba	Wild	Gymnosperm	Pinaceae				NA	Madmony	2005	1	https://link.springer.com/content/pdf/10.1007/BF02931568.pdf	Madmony et al., 2005	0
876	Pinus radiata	Pinus radiata D.Don	Wild	Gymnosperm	Pinaceae				NA	Madmony	2005	1	https://link.springer.com/content/pdf/10.1007/BF02931568.pdf	Madmony et al., 2005	0
877	Cupressus sempervirens	Cupressus sempervirens L.	Wild	Gymnosperm	Cupressaceae				NA	Madmony	2005	1	https://link.springer.com/content/pdf/10.1007/BF02931568.pdf	Madmony et al., 2005	0
878	Prosopis sp.	Prosopis sp.	Cultivated	Angiosperm	Fabaceae	Dicot	Bicellular	Wet	NA	Pasiecznik	2006	1	https://link.springer.com/content/pdf/10.1007/s10530-005-5106-0.pdf	Pasiecznik et al., 2006	0.008	0.17	1.62
879	× Chitalpa tashkentensis T.S.Elias & Wisura	× Chitalpa tashkentensis T.S.Elias & Wisura	Cultivated	Angiosperm	Bignoniaceae	Dicot	Bicellular	Wet	Starchy and starchless	Olsen	2006	1	https://journals.ashs.org/jashs/view/journals/jashs/131/6/article-p716.xml	Olsen et al., 2006		0.15
880	Catalpa bignonioides	Catalpa bignonioides Walter	Cultivated	Angiosperm	Bignoniaceae	Dicot	Bicellular	Wet	Starchy and starchless	Olsen	2006	1	https://journals.ashs.org/jashs/view/journals/jashs/131/6/article-p716.xml	Olsen et al., 2006		0.15
881	Chilopsis linearis	Chilopsis linearis (Cav.) Sweet	Wild	Angiosperm	Bignoniaceae	Dicot	Bicellular	Wet	Starchy and starchless	Olsen	2006	1	https://journals.ashs.org/jashs/view/journals/jashs/131/6/article-p716.xml	Olsen et al., 2006		0.15
882	Picea wilsonii	Picea wilsonii Mast.	Cultivated	Gymnosperm	Pinaceae				NA	Kong	2006	1	https://academic.oup.com/treephys/article/26/8/1001/1638313	Kong et al., 2006		0.12	1.62			1.83																													50 citrate-phosphate
883	Lycopersicon esculentum Mill.	Lycopersicon esculentum Mill.	Cultivated	Angiosperm	Solanaceae	Dicot	Bicellular	Wet	Starchy and starchless	Karapanos	2006	0	https://www.tandfonline.com/doi/abs/10.1080/14620316.2006.11512116	Karapanos et al., 2006	0.015	0.1
884	Citrus aurantiifolia (Christm.) Swingle	Citrus aurantiifolia (Christm.) Swingle	Cultivated	Angiosperm	Rutaceae	Dicot	Bicellular	Wet	Starchy and starchless	Manju	2006	0	http://apps.webofknowledge.com/full_record.do?product=UA&search_mode=GeneralSearch&qid=2&SID=C4kArOWMkGyN5PzQmqW&page=2&doc=15&cacheurlFromRightClick=no	Manju & Rawat, 2006	0	0.1
885	Platanus acerifolia	Platanus acerifolia (Aiton) Willd.	Wild	Angiosperm	Platanaceae	Dicot	Bicellular	Dry	Starchless	Li Zhi-Neng	2006	0	http://apps.webofknowledge.com/full_record.do?product=UA&search_mode=GeneralSearch&qid=2&SID=C4kArOWMkGyN5PzQmqW&page=2&doc=19&cacheurlFromRightClick=no	Li et al., 2006	0	0.15	1.62
886	Eugenia involucrata DC	Eugenia involucrata DC.	Cultivated	Angiosperm	Myrtaceae	Dicot	Bicellular	Dry	Starchless	Franzon	2006	1	https://www.scielo.br/scielo.php?script=sci_arttext&pid=S0100-29452006000100008&lng=pt&tlng=pt	Franzon & Raseira, 2006	0.01	0.1
887	Citrus sinensis Osbeck	Citrus sinensis (L.) Osbeck	Cultivated	Angiosperm	Rutaceae	Dicot	Bicellular	Wet	Starchy and starchless	Salles	2006	1	https://www.scielo.br/pdf/cagro/v30n1/v30n1a25.pdf	Salles et al., 2006	0.01	0.1	3.24			4.88
888	Ribes nigrum L.	Ribes nigrum L.	Cultivated	Angiosperm	Grossulariaceae	Dicot	Bicellular	Wet	NA	Denisow	2006	1	https://www.researchgate.net/publication/271265293_The_biological_value_of_pollen_of_some_blackcurrantcultivars_Ribes_nigrum_L	Denisow, 2006	0.125	0.006
889	Olea europaea	Olea europaea L.	Cultivated	Angiosperm	Oleaceae	Dicot	Bicellular	Dry	NA	Mehri	2006	1	https://www.jstor.org/stable/pdf/42882472.pdf?refreqid=excelsior%3A73ff3f533932da266e9e7c92889c7184	Maun et al., 1969	0.007	0.2	1.62
890	Kunzea pomifera	Kunzea pomifera F.Muell.	Cultivated	Angiosperm	Myrtaceae	Dicot	Bicellular	Dry	Starchless	Page	2006	1	https://www.researchgate.net/publication/248899040_Pollen_viability_in_Kunzea_pomifera_Myrtaceae_as_influenced_by_sucrose_concentration_and_storage	Page et al., 2006	0	0.075	2			6
891	Carica papaya	Carica papaya L.	Cultivated	Angiosperm	Caricaceae	Dicot	Bicellular	Dry	NA	Drew	2006	1	https://www.researchgate.net/publication/29463676_Breeding_for_Papaya_ringspot_virus_resistance_in_Carica_papaya_via_hybridisation_with_Vasconcellea_quercifolia	Drew et al., 2006	0	0.1	1.62			1.27						0.81				0.99
892	Vasconcellea quercifolia	Vasconcellea quercifolia A. St.-Hil.	Cultivated	Angiosperm	Caricaceae	Dicot	Bicellular	Dry	NA	Drew	2006	1	https://www.researchgate.net/publication/29463676_Breeding_for_Papaya_ringspot_virus_resistance_in_Carica_papaya_via_hybridisation_with_Vasconcellea_quercifolia	Drew et al., 2006	0	0.1	1.62			1.27						0.81				0.99
893	Prunus persica SIEB.	Prunus persica (L.) Batsch	Cultivated	Angiosperm	Rosaceae	Dicot	Bicellular	Wet	Starchy and starchless	Kang	2006	0	http://apps.webofknowledge.com/full_record.do?product=UA&search_mode=GeneralSearch&qid=2&SID=E5yxCr8PccjjdYxBWnl&page=3&doc=27&cacheurlFromRightClick=no	Kang & Cohi, 2006	0.01	0.1	1.62
894	Citrus clementina hort. × Citrus reticulata Blanco	Citrus clementina hort. × Citrus reticulata Blanco	Cultivated	Angiosperm	Rutaceae	Dicot	Bicellular	Wet	Starchy and starchless	Mesejo	2006	1	https://www.academia.edu/26959007/The_inhibitory_effect_of_CuSO4_on_Citrus_pollen_germination_and_pollen_tube_growth_and_its_application_for_the_production_of_seedless_fruit	Mesejo et al., 2006	0.01	0.1	1.62			1.83										0.99
895	Malvastrum coromandelianum	Malvastrum coromandelianum (L.) Garcke	Cultivated	Angiosperm	Malvaceae	Dicot	Bicellular	Dry	Starchy	Rajashekar	2007	0	http://apps.webofknowledge.com/full_record.do?product=UA&search_mode=GeneralSearch&qid=5&SID=E5yxCr8PccjjdYxBWnl&page=1&doc=1&cacheurlFromRightClick=no	Rajashekar et al., 2007
896	Sida acuta	Sida acuta Burm.f.	Cultivated	Angiosperm	Malvaceae	Dicot	Bicellular	Dry	Starchy	Rajashekar	2007	0	http://apps.webofknowledge.com/full_record.do?product=UA&search_mode=GeneralSearch&qid=5&SID=E5yxCr8PccjjdYxBWnl&page=1&doc=1&cacheurlFromRightClick=no	Rajashekar et al., 2007
897	Catharanthus roseus L.	Catharanthus roseus (L.) G.Don	Cultivated	Angiosperm	Apocynaceae	Dicot	Bicellular	Dry and wet	Starchless	Rajashekar	2007	0	http://apps.webofknowledge.com/full_record.do?product=UA&search_mode=GeneralSearch&qid=5&SID=E5yxCr8PccjjdYxBWnl&page=1&doc=1&cacheurlFromRightClick=no	Rajashekar et al., 2007
898	Citrus reticulata	Citrus reticulata Blanco	Cultivated	Angiosperm	Rutaceae	Dicot	Bicellular	Wet	Starchy and starchless	Altaf	2007	1	http://www.pakbs.org/pjbot/PDFs/39(6)/PJB39(6)2003.pdf	Altaf & Rehman Khan, 2008	0.01	0.1	3.24			4.88
899	Dendrobium (Dendrobium Pinky × Dendrobium Kiyomi Beauty)	Dendrobium	Cultivated	Angiosperm	Orchidaceae	Monocot	Bicellular	Wet	Starchless	Hee	2007	1	https://link.springer.com/article/10.1007%2Fs00299-007-0421-9	Hee et al., 2007	0.3% Gelrite	0.05	1.62			1.65 (H2O)						0.82 (7H2O)				0.99
900	Pyrus pyrifolia L.	Pyrus pyrifolia (Burm.f.) Nakai	Cultivated	Angiosperm	Rosaceae	Dicot	Bicellular	Wet	Starchy and starchless	Liu	2007	1	https://link.springer.com/content/pdf/10.1007/s00709-007-0269-4.pdf	Liu et al., 2007		0.1	1.62			2.97 (4H2O)						0.82 (7H2O)				0.99
901	Arabidopsis thaliana	Arabidopsis thaliana (L.) Heynh.	Cultivated	Angiosperm	Brassicaceae	Dicot	Tricellular	Dry	NA	Boavida	2007	1	https://onlinelibrary.wiley.com/doi/epdf/10.1111/j.1365-313X.2007.03248.x	Boavida & McCormick, 2007	0.015	0.1	1.62								5	1							5
902	Epimedium brevicornum	Epimedium brevicornu Maxim.	Wild	Angiosperm	Berberidaceae	Dicot	Bicellular	Dry	Starchless	Quan Qin-Mei	2007	0	https://europepmc.org/article/cba/645011	Quan et al., 2007		0.15	0.65			0.17 (4H2O)
903	Orychophragmus violaceus	Orychophragmus violaceus (L.) O.E. Schulz	Wild	Angiosperm	Brassicaceae	Dicot	Tricellular	Dry	NA	Zhao	2007	1	https://link.springer.com/article/10.1007%2Fs11240-007-9277-5	Zhao et al., 2007		20.54% (Maltose)	1.6			2.9																									0.03 (B1)
904	Papaver rhoeas	Papaver rhoeas L.	Wild	Angiosperm	Papaveraceae	Dicot	Bicellular	Dry	Starchless	Gossot	2007	1	https://link.springer.com/article/10.1007%2Fs00425-007-0491-5	Gossot & Geitmann, 2007		0	1.62			1.65 (H2O)						0.82 (7H2O)				0.99
905	Musa genotypes	Musa	Cultivated	Angiosperm	Musaceae	Monocot	Bicellular	Wet	Starchless	Nyine	2007	1	https://www.researchgate.net/publication/27797777_Banana_nectar_as_a_medium_for_testing_pollen_viability_and_germination_in_Musa	Nyine & Pillay, 2007	0	0.03	0.17			2.44						1.02 (7H2O)				2.48
906	Musa genotypes	Musa	Cultivated	Angiosperm	Musaceae	Monocot	Bicellular	Wet	Starchless	Nyine	2007	1	https://www.researchgate.net/publication/27797777_Banana_nectar_as_a_medium_for_testing_pollen_viability_and_germination_in_Musa	Nyine & Pillay, 2007	0	banana nector
907	Eugenia uniflora L.	Eugenia uniflora L.	Cultivated	Angiosperm	Myrtaceae	Dicot	Bicellular	Dry	Starchless	Franzon	2007	1	https://www.cabdirect.org/cabdirect/FullTextPDF/2009/20093147539.pdf	Franzon et al., 2007	0.01	10% sugar
908	Betula alnoides	Betula alnoides Buch.-Ham. ex D.Don	Wild	Angiosperm	Betulaceae	Dicot	Bicellular	Dry	Starchy and starchless	Cheng Wei	2007	0	http://apps.webofknowledge.com/full_record.do?product=UA&search_mode=GeneralSearch&qid=5&SID=E5yxCr8PccjjdYxBWnl&page=2&doc=17&cacheurlFromRightClick=no	Cheng et al., 2007	0	0.15	3.24
909	Durio zibethinus	Durio zibethinus L.	Cultivated	Angiosperm	Malvaceae	Dicot	Bicellular	Dry	Starchy	Honsho	2007	1	https://www.jstage.jst.go.jp/article/jjshs/76/2/76_2_120/_pdf	Honsho et al., 2007	0.01	0.1	1.62			1.28 (4H2O)						0.82 (7H2O)				0.99
910	Phaseolus vulgaris L.	Phaseolus vulgaris L.	Cultivated	Angiosperm	Fabaceae	Dicot	Bicellular	Wet	NA	Gurusamy	2007	1	https://onlinelibrary.wiley.com/doi/epdf/10.1111/j.1439-0523.2007.01337.x	Gurusamy et al., 2007		0.4	6.47			3.66						3.33				3.96
911	Phaseolus angustissimus	Phaseolus angustissimus A.Gray	Wild	Angiosperm	Fabaceae	Dicot	Bicellular	Wet	NA	Gurusamy	2007	1	https://onlinelibrary.wiley.com/doi/epdf/10.1111/j.1439-0523.2007.01337.x	Gurusamy et al., 2007		0.4	6.47			3.66						3.33				3.96
912	Sorghum halepense	Sorghum halepense (L.) Pers.	Cultivated	Angiosperm	Poaceae	Monocot	Tricellular	Dry	NA	Burke	2007	1	https://bioone.org/journals/Weed-Technology/volume-21/issue-2/WT-06-061.1/Johnsongrass-Sorghum-Halepense-Pollen-Expresses-Accase-Target-site-Resistance/10.1614/WT-06-061.1.full	Burke et al., 2007	0	0.103	2.43			3
913	Prunus armeniaca	Prunus armeniaca L.	Cultivated	Angiosperm	Rosaceae	Dicot	Bicellular	Wet	Starchy and starchless	Liu	2007	1	https://link.springer.com/article/10.1007%2Fs11240-007-9201-z	Liu et al., 2007	0.01	0.1	4.86
914	Prunus salicina	Prunus salicina Lindl.	Cultivated	Angiosperm	Rosaceae	Dicot	Bicellular	Wet	Starchy and starchless	Liu	2007	1	https://link.springer.com/article/10.1007%2Fs11240-007-9201-z	Liu et al., 2007	0.01	0.1	4.86
915	Eriobotrya japonica	Eriobotrya japonica (Thunb.) Lindl.	Cultivated	Angiosperm	Rosaceae	Dicot	Bicellular	Wet	Starchy and starchless	Demirkeser	2007	1	http://docsdrive.com/pdfs/ansinet/ajps/2007/304-307.pdf	Demirkeser et al., 2007	0	0.2
916	Ficus carica	Ficus carica L.	Cultivated	Angiosperm	Moraceae	Dicot	Bicellular	Dry	NA	Ilgin	2007	1	http://citeseerx.ist.psu.edu/viewdoc/download?doi=10.1.1.508.6429&rep=rep1&type=pdf	Ilgin et al., 2007	0.01	0.2	8.09													2.48
917	Citrus × sinensis	Citrus sinensis (L.) Osbeck	Cultivated	Angiosperm	Rutaceae	Dicot	Bicellular	Wet	Starchy and starchless	Pio, Leila Aparecida Salles	2007	1	https://www.scielo.br/pdf/cagro/v31n1/v31n1a22.pdf	Pio et al., 2007	0.01	0.1	3.24			3.39 (4H2O)
918	Eucalyptus grandis	Eucalyptus grandis W.Hill	Cultivated	Angiosperm	Myrtaceae	Dicot	Bicellular	Dry	Starchless	Horsley	2007	1	https://www.academia.edu/5357617/Optimising_storage_and_in_vitro_germination_of_Eucalyptus_pollen	Horsley et al., 2007	0	0.3	0.01
919	Eucalyptus smithii	Eucalyptus smithii F.Muell. ex R.T.Baker	Cultivated	Angiosperm	Myrtaceae	Dicot	Bicellular	Dry	Starchless	Horsley	2007	1	https://www.academia.edu/5357617/Optimising_storage_and_in_vitro_germination_of_Eucalyptus_pollen	Horsley et al., 2007	0	0.3	0.01
920	Eucalyptus nitens	Eucalyptus nitens (H.Deane & Maiden) Maiden	Cultivated	Angiosperm	Myrtaceae	Dicot	Bicellular	Dry	Starchless	Horsley	2007	1	https://www.academia.edu/5357617/Optimising_storage_and_in_vitro_germination_of_Eucalyptus_pollen	Horsley et al., 2007	0	0.3	0.01
921	Eucalyptus dunnii	Eucalyptus dunnii Maiden	Cultivated	Angiosperm	Myrtaceae	Dicot	Bicellular	Dry	Starchless	Horsley	2007	1	https://www.academia.edu/5357617/Optimising_storage_and_in_vitro_germination_of_Eucalyptus_pollen	Horsley et al., 2007	0	0.3	0.01
922	Eucalyptus macarthurii	Eucalyptus macarthurii H.Deane & Maiden	Cultivated	Angiosperm	Myrtaceae	Dicot	Bicellular	Dry	Starchless	Horsley	2007	1	https://www.academia.edu/5357617/Optimising_storage_and_in_vitro_germination_of_Eucalyptus_pollen	Horsley et al., 2007	0	0.3	0.01
923	Rosa cultivars	Rosa	Cultivated	Angiosperm	Rosaceae	Dicot	Bicellular	Dry	Starchy and starchless	Richer	2007	1	https://www.nrcresearchpress.com/doi/pdf/10.4141/P05-247	Richer et al., 2007	0	0.15
924	Prunus avium L.	Prunus avium (L.) L.	Cultivated	Angiosperm	Rosaceae	Dicot	Bicellular	Wet	Starchy and starchless	Tosun	2007	1	https://www.agriculturejournals.cz/publicFiles/00225.pdf	Tosun & Koyuncu, 2007	0.005	0.15	0.09
925	Lycopersicon esculentum Mill.	Lycopersicon esculentum Mill.	Cultivated	Angiosperm	Solanaceae	Dicot	Bicellular	Wet	Starchy and starchless	Song	2007	1	https://academic.oup.com/jxb/article/58/15-16/4235/451816	Song & Tachibana, 2007	0	0.02	1.6			3						0.8				1																			20 MES
926	Prunus armeniaca	Prunus armeniaca L.	Cultivated	Angiosperm	Rosaceae	Dicot	Bicellular	Wet	Starchy and starchless	Asma	2008	1	https://www.researchgate.net/publication/272024168_Determination_of_pollen_viability_germination_ratios_and_morphology_of_eight_apricot_genotypes	Asma, 2008	0.01	0.15
927	Hippophae rhamnoides L.	Elaeagnus rhamnoides (L.) A.Nelson	Cultivated	Angiosperm	Elaeagnaceae	Dicot	Bicellular	Dry	NA	Kuznetzova	2008	0	http://apps.webofknowledge.com/full_record.do?product=UA&search_mode=GeneralSearch&qid=6&SID=D5IfJPdZGxuqxujXf1h&page=1&doc=2&cacheurlFromRightClick=no	Kuznetzova & Lapshin, 2008	0.01	0.15	0.49								0.01
928	Arabidopsis thaliana	Arabidopsis thaliana (L.) Heynh.	Cultivated	Angiosperm	Brassicaceae	Dicot	Tricellular	Dry	NA	Li	2008	1	https://www.sciencedirect.com/science/article/pii/S1674205214604573?via%3Dihub	Li et al., 2008	0.007	0.18	1.62			2.5					2.5	1
929	Lilium longiflorum	Lilium longiflorum Thunb.	Wild	Angiosperm	Liliaceae	Monocot	Bicellular	Wet	Starchless	Sawidis	2008	1	https://link.springer.com/content/pdf/10.1007/s00709-008-0306-y.pdf	Sawidis, 2008	0	0.1	0.17
930	Nicotiana tabacum	Nicotiana tabacum L.	Cultivated	Angiosperm	Solanaceae	Dicot	Bicellular	Wet	Starchy and starchless	Sawidis	2008	1	https://link.springer.com/content/pdf/10.1007/s00709-008-0306-y.pdf	Sawidis, 2008	0	0.1	0.17
931	Olea europaea L.	Olea europaea L.	Cultivated	Angiosperm	Oleaceae	Dicot	Bicellular	Dry	NA	Morales	2008	1	https://onlinelibrary.wiley.com/doi/full/10.1111/j.1365-2818.2008.02044.x	Morales et al., 2008		0.1	4.86			1.83						1.67				0.99
932	Musa diploids	Musa	Cultivated	Angiosperm	Musaceae	Monocot	Bicellular	Wet	Starchless	Soares	2008	1	http://www.sbmp.org.br/cbab/siscbab/uploads/bd6b9df0-14d5-c291.pdf	Soares et al., 2008	0.008	0.15	1.62			1.28 (4H2O)						0.82 (7H2O)				0.99
933	Brassica napus L.	Brassica napus L.	Cultivated	Angiosperm	Brassicaceae	Dicot	Tricellular	Dry	NA	Singh	2008	1	https://onlinelibrary.wiley.com/doi/full/10.1111/j.1439-037X.2008.00309.x	Singh et al., 2008	0.01	1	4.05								8.11					4.95																			8.26 TRIS
934	Cucumis sativus	Cucumis sativus L.	Cultivated	Angiosperm	Cucurbitaceae	Dicot	Bicellular	Dry	Starchy and starchless	Diola	2008	1	https://www.scielo.br/pdf/hb/v26n1/a06v26n1.pdf	Diola et al., 2008	0.02	0.2	4.86
935	Olea europaea L.	Olea europaea L.	Cultivated	Angiosperm	Oleaceae	Dicot	Bicellular	Dry	NA	Ferri	2008	1	https://www.jstor.org/stable/pdf/42882626.pdf?refreqid=excelsior%3A749a820fa94e4d5e3828ca03813d9a45	Ferri et al., 2008	0.6% phytoagar	0.15	0.81
936	Olea europaea L.	Olea europaea L.	Cultivated	Angiosperm	Oleaceae	Dicot	Bicellular	Dry	NA	Ferri	2008	1	https://www.jstor.org/stable/pdf/42882626.pdf?refreqid=excelsior%3A749a820fa94e4d5e3828ca03813d9a45	Ferri et al., 2008	0.6% phytoagar	0.15
937	Olea europaea L.	Olea europaea L.	Cultivated	Angiosperm	Oleaceae	Dicot	Bicellular	Dry	NA	Ferri	2008	1	https://www.jstor.org/stable/pdf/42882626.pdf?refreqid=excelsior%3A749a820fa94e4d5e3828ca03813d9a45	Ferri et al., 2008	0.6% phytoagar	0.1	1.62
938	Castanea sativa L.	Castanea sativa Mill.	Cultivated	Angiosperm	Fagaceae	Dicot	Bicellular	Dry	Starchless	Beyhan	2008	1	https://www.agriculturejournals.cz/publicFiles/23_2008-HORTSCI.pdf	Beyhan & Serdar, 2008	0.01	0.1
939	Citrus x sinensis	Citrus sinensis (L.) Osbeck	Cultivated	Angiosperm	Rutaceae	Dicot	Bicellular	Wet	Starchy and starchless	Darlan Ramos	2008	1	http://www.scielo.org.ve/scielo.php?script=sci_arttext&pid=S0378-18442008000100011&lng=en&tlng=en&SID=D5IfJPdZGxuqxujXf1h	Ramos et al., 2008		0.1	3.24		19.97
940	Camellia sinensis	Camellia sinensis (L.) Kuntze	Wild	Angiosperm	Theaceae	Dicot	Bicellular	Wet	Starchless	Kim	2008	0	http://apps.webofknowledge.com/full_record.do?product=UA&search_mode=GeneralSearch&qid=6&SID=D5IfJPdZGxuqxujXf1h&page=3&doc=30&cacheurlFromRightClick=no	Kim & Song, 2008	0.02	0.1
941	Prunus armeniaca L.	Prunus armeniaca L.	Cultivated	Angiosperm	Rosaceae	Dicot	Bicellular	Wet	Starchy and starchless	Huang Jia-Xing	2008	0	http://en.cnki.com.cn/Article_en/CJFDTOTAL-DNYX200801015.htm	Huang et al., 2008	0	0.2	6.47								0.91
942	Cucurbita moschata	Cucurbita moschata Duchesne	Cultivated	Angiosperm	Cucurbitaceae	Dicot	Bicellular	Dry	Starchy and starchless	Kurtar	2009	1	https://www.researchgate.net/publication/237747267_Influence_of_gamma_irradiation_on_pollen_viability_germination_ability_and_fruit_and_seed-set_of_pumpkin_and_winter_squash	Kurtar, 2009	0.002	0.2	1.62			1.28 (4H2O)						0.82 (7H2O)				0.99
943	Cucurbita maxima	Cucurbita maxima Duchesne	Cultivated	Angiosperm	Cucurbitaceae	Dicot	Bicellular	Dry	Starchy and starchless	Kurtar	2009	1	https://www.researchgate.net/publication/237747267_Influence_of_gamma_irradiation_on_pollen_viability_germination_ability_and_fruit_and_seed-set_of_pumpkin_and_winter_squash	Kurtar, 2009	0.002	0.2	1.62			1.28 (4H2O)						0.82 (7H2O)				0.99
944	Solanum melongena	Solanum melongena L.	Cultivated	Angiosperm	Solanaceae	Dicot	Bicellular	Wet	Starchy and starchless	De Franca	2009	1	https://www.alice.cnptia.embrapa.br/bitstream/doc/780407/1/francaviability.pdf	de França et al., 2009		0.008	1617.34			4852.02 (4H2O)						811.45 (7H2O)				989.09
945	Zoysia japonica	Zoysia japonica Steud.	Wild	Angiosperm	Poaceae	Monocot	Tricellular	Dry	NA	Kang	2009	1	https://link.springer.com/article/10.1007%2Fs12374-009-9074-2	Kang et al., 2009	0.3% (phytogel)	0.2	0.81
946	Cedrus libani	Cedrus libani A.Rich.	Wild	Gymnosperm	Pinaceae				NA	Caliskan	2009	1	https://www.researchgate.net/publication/277877730_Pollen_characteristics_and_in_vitro_pollen_germination_of_Cedrus_libani_A_Rich	Çalişkan et al., 2009	0.02	0.05
947	Lilium longiflorum	Lilium longiflorum Thunb.	Wild	Angiosperm	Liliaceae	Monocot	Bicellular	Wet	Starchless	Pertl	2009	1	https://pubs.acs.org/doi/pdf/10.1021/pr900503f	Pertl et al., 2009		0.1	1.6								0.1								1
948	Brassica napus L.	Brassica napus L.	Cultivated	Angiosperm	Brassicaceae	Dicot	Tricellular	Dry	NA	Sheoran	2009	1	https://link.springer.com/article/10.1007/s00425-009-0983-6	Sheoran et al., 2009		0.2	0.16								3					1																			0.66 TRIS
949	Pyrus pyrifolia Nakai	Pyrus pyrifolia (Burm.f.) Nakai	Cultivated	Angiosperm	Rosaceae	Dicot	Bicellular	Wet	Starchy and starchless	Okusaka	2009	1	https://www.yumpu.com/en/document/read/19249881/fructose-inhibits-pear-pollen-germination-on-agar-medium-without-	Okusaka & Hiratsuka, 2009	0.01	0.1	1.62
950	Dendrobium hercoglossum	Dendrobium hercoglossum Rchb.f.	Wild	Angiosperm	Orchidaceae	Monocot	Bicellular	Wet	Starchless	Li Zhen-Jian	2009	0	https://www.cabdirect.org/cabdirect/abstract/20093320935	Li et al., 2009		0.3									0.01
951	Acacia nilotica subsp. indica (Benth.) Brenan	Acacia nilotica subsp. indica (Benth.) Brenan	Wild	Angiosperm	Fabaceae	Dicot	Bicellular	Wet	NA	Sekar	2009	0	https://www.cabdirect.org/cabdirect/abstract/20093280721	Sekar & Ganesan, 2009		0.08	16.16
952	Picea wilsonii	Picea wilsonii Mast.	Cultivated	Gymnosperm	Pinaceae				NA	Yu, Yanli	2009	1	https://academic.oup.com/jxb/article/60/9/2737/513573	Yu et al., 2009	0	0.12	1.62			1.83																													5 citrate-phosphate
953	Solidago canadensis	Solidago canadensis L.	Wild	Angiosperm	Asteraceae	Dicot	Tricellular	Dry	NA	Guo	2009	1	https://onlinelibrary.wiley.com/doi/epdf/10.1111/j.1365-3180.2009.00693.x	Guo et al., 2009	0.005	0.2	0.17
954	Castanea sativa Mill.	Castanea sativa Mill.	Cultivated	Angiosperm	Fagaceae	Dicot	Bicellular	Dry	Starchless	Beyhan	2009	1	https://www.pubhort.org/members/showdocument?series=fruits&pdffile=-bs-actahort-bs-fruits-bs-pdf-bs-2009-bs-03-bs-i9304.pdf&layout=pubhort&action=showdocument&lidvan=ishs&yearfruits=2009&volume=64&issue=3&edpsref=i9304	Beyhan & Serdar, 2009	0.01	0.1
955	Nicotiana tabacum L.	Nicotiana tabacum L.	Cultivated	Angiosperm	Solanaceae	Dicot	Bicellular	Wet	Starchy and starchless	Breygina	2009	1	https://link.springer.com/content/pdf/10.1134/S1062360409030047.pdf	Breygina et al., 2009		0.103	1.6			3						0.8				1																			25 MES-TRIS
956	Catalpa bungei	Catalpa bungei C.A.Mey.	Wild	Angiosperm	Bignoniaceae	Dicot	Bicellular	Wet	Starchy and starchless	Jia Ji-Wen	2009	0	http://apps.webofknowledge.com/full_record.do?product=UA&search_mode=GeneralSearch&qid=2&SID=C6kygGXb5Lja2oTqlOz&page=4&doc=31&cacheurlFromRightClick=no	Jia et al., 2009		0.2	0.81
957	Catalpa fargesii	Catalpa fargesii Bureau	Wild	Angiosperm	Bignoniaceae	Dicot	Bicellular	Wet	Starchy and starchless	Jia Ji-Wen	2009	0	http://apps.webofknowledge.com/full_record.do?product=UA&search_mode=GeneralSearch&qid=2&SID=C6kygGXb5Lja2oTqlOz&page=4&doc=31&cacheurlFromRightClick=no	Jia et al., 2009		0.2	0.81
958	Catalpa fargesii f. duclouxii (Dode) Gilmour	Catalpa duclouxii Dode	Wild	Angiosperm	Bignoniaceae	Dicot	Bicellular	Wet	Starchy and starchless	Jia Ji-Wen	2009	0	http://apps.webofknowledge.com/full_record.do?product=UA&search_mode=GeneralSearch&qid=2&SID=C6kygGXb5Lja2oTqlOz&page=4&doc=31&cacheurlFromRightClick=no	Jia et al., 2009		0.2	0.81
959	Pistacia chinensis	Pistacia chinensis Bunge	Cultivated	Angiosperm	Anacardiaceae	Dicot	Bicellular	Wet	Starchy and starchless	Li Xu-Xin	2009	0	https://www.cabdirect.org/cabdirect/abstract/20093205556	Li et al., 2009		0.15	1.62
960	Arabidopsis thaliana	Arabidopsis thaliana (L.) Heynh.	Cultivated	Angiosperm	Brassicaceae	Dicot	Tricellular	Dry	NA	Daher	2009	1	https://link.springer.com/article/10.1007%2Fs00299-008-0647-1	Bou Daher et al., 2009	0.005	0.18	1.62			2					2	1							1
961	Petunia hybrida	Petunia hybrida Vilm.	Cultivated	Angiosperm	Solanaceae	Dicot	Bicellular	Wet	Starchy and starchless	Kovaleva	2009	1	https://www.researchgate.net/profile/A_Voronkov/publication/271908849_Effects_of_flavonols_and_phytohormones_on_germination_and_growth_of_petunia_male_gametophyte/links/5a30182ca6fdccbf7ef13341/Effects-of-flavonols-and-phytohormones-on-germination-and-growth-of-petunia-male-gametophyte.pdf	Kovaleva et al., 2009		0.137	1.6
962	Prunus persica 'Aurora'	Prunus persica (L.) Batsch	Cultivated	Angiosperm	Rosaceae	Dicot	Bicellular	Wet	Starchy and starchless	Chagas	2009	0	https://www.cabdirect.org/cabdirect/abstract/20093334885	Chagas et al., 2009	0.01	0.008	6.47
963	Prunus persica 'Douradao'	Prunus persica (L.) Batsch	Cultivated	Angiosperm	Rosaceae	Dicot	Bicellular	Wet	Starchy and starchless	Chagas	2009	0	https://www.cabdirect.org/cabdirect/abstract/20093334885	Chagas et al., 2009	0.01	0.09	6.47			2.25
964	Hippophae rhamnoides L. ssp sinensis	Hippophae rhamnoides subsp. sinensis Rousi	Cultivated	Angiosperm	Elaeagnaceae	Dicot	Bicellular	Dry	NA	Sun Kun	2009	0	http://en.cnki.com.cn/Article_en/CJFDTotal-XBSF200902022.htm	Sun et al., 2009		0.2	0.17
965	Oryza sativa subsp. japonica S.Kato	Oryza sativa L.	Cultivated	Angiosperm	Poaceae	Monocot	Tricellular	Dry	NA	Zhang	2010	1	https://acsess.onlinelibrary.wiley.com/doi/pdf/10.2135/cropsci2010.02.0066	Zhang et al., 2010		0.2	1.62								4.51
966	Rosa canina	Rosa canina L.	Wild	Angiosperm	Rosaceae	Dicot	Bicellular	Dry	Starchy and starchless	Sharafi	2010	1	https://academicjournals.org/article/article1380538181_Sharafi.pdf	Sharafi, 2010	0.012	0.15	0.17
967	Crataegus genotypes	Crataegus	Cultivated	Angiosperm	Rosaceae	Dicot	Bicellular	Wet	Starchy and starchless	Sharafi	2010	1	http://research.shahed.ac.ir/WSR/SiteData/PaperFiles/7004_778186424.pdf	Sharafi, 2010	0.012	0.15	1.22
968	Brachiaria ruziziensis	Brachiaria ruziziensis Germ. & C.M.Evrard	Cultivated	Angiosperm	Poaceae	Monocot	Tricellular	Dry	NA	Dusi	2010	1	https://link.springer.com/article/10.1007%2Fs00497-010-0134-z	Dusi et al., 2010	0.0019	0.33	0.49			0.19
969	Brachiaria humidicola	Brachiaria humidicola (Rendle) Schweick.	Cultivated	Angiosperm	Poaceae	Monocot	Tricellular	Dry	NA	Dusi	2010	1	https://link.springer.com/article/10.1007%2Fs00497-010-0134-z	Dusi et al., 2010	0.0019	0.33	0.49			0.19
970	Brachiaria decumbens	Brachiaria decumbens Stapf	Cultivated	Angiosperm	Poaceae	Monocot	Tricellular	Dry	NA	Dusi	2010	1	https://link.springer.com/article/10.1007%2Fs00497-010-0134-z	Dusi et al., 2010	0.0019	0.33	0.49			0.19
971	Lycopersicon esculentum Mill.	Lycopersicon esculentum Mill.	Cultivated	Angiosperm	Solanaceae	Dicot	Bicellular	Wet	Starchy and starchless	Karapanos	2010	1	https://link.springer.com/article/10.1007%2Fs00497-009-0132-1	Karapanos et al., 2010	0	0.1	0.81			1.28 (4H2O)						0.82 (7H2O)				0.99
972	Pistacia vera L.	Pistacia vera L.	Cultivated	Angiosperm	Anacardiaceae	Dicot	Bicellular	Wet	Starchy and starchless	Acar	2010	1	https://www.researchgate.net/publication/267860380_Effects_of_boron_and_gibberellic_acid_on_in_vitro_pollen_germination_of_pistachio_Pistacia_vera_L	Acar et al., 2010		0.2	1.62
973	Pistacia vera L.	Pistacia vera L.	Cultivated	Angiosperm	Anacardiaceae	Dicot	Bicellular	Wet	Starchy and starchless	Acar	2010	1	https://www.researchgate.net/publication/267860380_Effects_of_boron_and_gibberellic_acid_on_in_vitro_pollen_germination_of_pistachio_Pistacia_vera_L	Acar et al., 2010		0.2
974	Begonia parvula	Begonia parvula H.Lév. & Vaniot	Wild	Angiosperm	Begoniaceae	Dicot	Bicellular	Dry	Starchless	Hu	2010	1	https://www.pubhort.org/ejhs/2010/file_1725672.pdf	Hu et al., 2010	0	0.1	1.62			0.85 (4H2O)						0.41 (7H2O)				0.99
975	Fraxinus excelsior	Fraxinus excelsior L.	Cultivated	Angiosperm	Oleaceae	Dicot	Bicellular	Dry	NA	Schulte	2010	1	https://onlinelibrary.wiley.com/doi/epdf/10.1002/jbio.201000031	Schulte et al., 2010	0	0.014	0.13								0.02								0.02
976	Salix caprea	Salix caprea L.	Wild	Angiosperm	Salicaceae	Dicot	Bicellular	Dry	Starchless	Schulte	2010	1	https://onlinelibrary.wiley.com/doi/epdf/10.1002/jbio.201000031	Schulte et al., 2010	0	0.014	0.13								0.02								0.02
977	Pistacia atlantica	Pistacia atlantica Desf.	Cultivated	Angiosperm	Anacardiaceae	Dicot	Bicellular	Wet	Starchy and starchless	Acar	2010	1	https://www.researchgate.net/publication/222331537_The_effects_of_temperature_on_in_vitro_pollen_germination_and_pollen_tube_growth_of_Pistacia_spp	Acar & Kakani, 2010		0.2
978	Pistacia khinjuk	Pistacia khinjuk Stocks	Cultivated	Angiosperm	Anacardiaceae	Dicot	Bicellular	Wet	Starchy and starchless	Acar	2010	1	https://www.researchgate.net/publication/222331537_The_effects_of_temperature_on_in_vitro_pollen_germination_and_pollen_tube_growth_of_Pistacia_spp	Acar & Kakani, 2010		0.2
979	Pistacia terebinthus	Pistacia terebinthus L.	Cultivated	Angiosperm	Anacardiaceae	Dicot	Bicellular	Wet	Starchy and starchless	Acar	2010	1	https://www.researchgate.net/publication/222331537_The_effects_of_temperature_on_in_vitro_pollen_germination_and_pollen_tube_growth_of_Pistacia_spp	Acar & Kakani, 2010		0.2
980	Pistacia palaestina	Pistacia palaestina Boiss.	Cultivated	Angiosperm	Anacardiaceae	Dicot	Bicellular	Wet	Starchy and starchless	Acar	2010	1	https://www.researchgate.net/publication/222331537_The_effects_of_temperature_on_in_vitro_pollen_germination_and_pollen_tube_growth_of_Pistacia_spp	Acar & Kakani, 2010		0.2
981	Pistacia vera	Pistacia vera L.	Cultivated	Angiosperm	Anacardiaceae	Dicot	Bicellular	Wet	Starchy and starchless	Acar	2010	1	https://www.researchgate.net/publication/222331537_The_effects_of_temperature_on_in_vitro_pollen_germination_and_pollen_tube_growth_of_Pistacia_spp	Acar & Kakani, 2010		0.2
982	Jatropha curcas	Jatropha curcas L.	Cultivated	Angiosperm	Euphorbiaceae	Dicot	Bicellular	Dry	Starchy	Li Chun	2010	1	https://www.researchgate.net/profile/Shenghua_Wang2/publication/260386429_In_vitro_Maturation_and_Germination_of_Jatropha_curcas_Microspores/links/54c793830cf238bb7d0acb1d/In-vitro-Maturation-and-Germination-of-Jatropha-curcas-Microspores.pdf	Li, 2010	2.5% coconut water	0.2	1.62			2.44						1.67				0.99
983	Hedychium longicornutum	Hedychium longicornutum Griff. ex Baker	Wild	Angiosperm	Zingiberaceae	Monocot	Bicellular	Wet	NA	Sakhanokho	2010	1	https://naldc.nal.usda.gov/download/42926/PDF	Sakhanokho & Rajasekaran, 2010	0	0.411	3.24			2.56						0.9 (7H2O)				0.99
984	Hedychium sp.	Hedychium sp.	Cultivated	Angiosperm	Zingiberaceae	Monocot	Bicellular	Wet	NA	Sakhanokho	2010	1	https://naldc.nal.usda.gov/download/42926/PDF	Sakhanokho & Rajasekaran, 2010	0	0.411	3.24			2.56						0.9 (7H2O)				0.99
985	Syagrus romanzoffiana	Syagrus romanzoffiana (Cham.) Glassman	Wild	Angiosperm	Arecaceae	Monocot	Bicellular	Dry	NA	De Sousa	2010	1	https://www.cabdirect.org/cabdirect/FullTextPDF/2010/20103261345.pdf	de Sousa, 2010	0.003	0.1
986	Callistemon rigidus	Callistemon rigidus R.Br.	Wild	Angiosperm	Myrtaceae	Dicot	Bicellular	Dry	Starchless	Tamnet	2010	1	https://www.researchgate.net/publication/51577450_Study_of_Some_Factors_of_Conservation_of_Pollens_of_Two_Plant_Species_Callistemon_rigidus_and_Hymenocardia_acida_of_Bee_Flora_of_Adamawa_Cameroon	Tamnet et al., 2010	0.01	0.1
987	Hymenocardia acida	Hymenocardia acida Tul.	Wild	Angiosperm	Phyllanthaceae	Dicot	NA	NA	NA	Tamnet	2010	1	https://www.researchgate.net/publication/51577450_Study_of_Some_Factors_of_Conservation_of_Pollens_of_Two_Plant_Species_Callistemon_rigidus_and_Hymenocardia_acida_of_Bee_Flora_of_Adamawa_Cameroon	Tamnet et al., 2010	0.01	0.15
988	Phoenix dactylifera	Phoenix dactylifera L.	Cultivated	Angiosperm	Arecaceae	Monocot	Bicellular	Dry	NA	Mortazavi	2010	1	https://pdfs.semanticscholar.org/13fa/6a7b3ac09d45256042ec61b1bffec24de56f.pdf?_ga=2.38757283.1668351677.1590479101-218708052.1585738021	Mortazavi et al., 2010	0.01	0.15	0.81			1.22						1.67				0.99
989	Celosia argentea var. cristata (L.) Kuntze	Celosia argentea var. cristata (L.) Kuntze	Wild	Angiosperm	Amaranthaceae	Dicot	Tricellular	Dry	NA	Bodhipadma	2010	1	http://www.scienceasia.org/2010.36.n1/scias36_68.pdf	Bodhipadma et al., 2010	0.008	0.2	0.1								1
990	Daucus carota L. subsp. halophilus	Daucus carota subsp. halophilus (Brot.) A.Pujadas	Wild	Angiosperm	Apiaceae	Dicot	Tricellular	Wet	NA	Tavares	2010	1	https://link.springer.com/article/10.1007%2Fs11627-009-9258-y	Tavares et al., 2010	0.01	0.068
991	Prunus domestica	Prunus domestica L.	Cultivated	Angiosperm	Rosaceae	Dicot	Bicellular	Wet	Starchy and starchless	Deceault	2010	1	https://psfaculty.plantsciences.ucdavis.edu/polito/DeCeault%20and%20Polito.Prune%20Pollination%20Temperature..pdf	DeCeault & Polito, 2010	0.012	0.1	1								1
992	Rosa pendulina L.	Rosa pendulina L.	Wild	Angiosperm	Rosaceae	Dicot	Bicellular	Dry	Starchy and starchless	Wronska-Pilarek	2010	1	https://pdfs.semanticscholar.org/d9cf/f7007387bde352611291647a116164a62143.pdf?_ga=2.84240409.1668351677.1590479101-218708052.1585738021	Wrońska-Pilarek & Tomlik-Wyremblewska, 2010	0	0.15
993	Rosa pendulina L.	Rosa pendulina L.	Wild	Angiosperm	Rosaceae	Dicot	Bicellular	Dry	Starchy and starchless	Wronska-Pilarek	2010	1	https://pdfs.semanticscholar.org/d9cf/f7007387bde352611291647a116164a62143.pdf?_ga=2.84240409.1668351677.1590479101-218708052.1585738021	Wrońska-Pilarek & Tomlik-Wyremblewska, 2010	0.015	0.15
994	Rosa agrestis	Rosa agrestis Savi	Wild	Angiosperm	Rosaceae	Dicot	Bicellular	Dry	Starchy and starchless	Wronska-Pilarek	2010	1	https://pdfs.semanticscholar.org/d9cf/f7007387bde352611291647a116164a62143.pdf?_ga=2.84240409.1668351677.1590479101-218708052.1585738021	Wrońska-Pilarek & Tomlik-Wyremblewska, 2010	0	0.15
995	Rosa canina L	Rosa canina L.	Wild	Angiosperm	Rosaceae	Dicot	Bicellular	Dry	Starchy and starchless	Wronska-Pilarek	2010	1	https://pdfs.semanticscholar.org/d9cf/f7007387bde352611291647a116164a62143.pdf?_ga=2.84240409.1668351677.1590479101-218708052.1585738021	Wrońska-Pilarek & Tomlik-Wyremblewska, 2010	0.015	0.1	0.81
996	Rosa dumalis auct.	Rosa caesia subsp. vosagiaca (N.H.F.Desp.) D.H.Kent	Wild	Angiosperm	Rosaceae	Dicot	Bicellular	Dry	Starchy and starchless	Wronska-Pilarek	2010	1	https://pdfs.semanticscholar.org/d9cf/f7007387bde352611291647a116164a62143.pdf?_ga=2.84240409.1668351677.1590479101-218708052.1585738021	Wrońska-Pilarek & Tomlik-Wyremblewska, 2010	0.015	0.15	0.81
997	Rosa inodora	Rosa inodora Fr.	Wild	Angiosperm	Rosaceae	Dicot	Bicellular	Dry	Starchy and starchless	Wronska-Pilarek	2010	1	https://pdfs.semanticscholar.org/d9cf/f7007387bde352611291647a116164a62143.pdf?_ga=2.84240409.1668351677.1590479101-218708052.1585738021	Wrońska-Pilarek & Tomlik-Wyremblewska, 2010	0	0.15	0.81
998	Rosa jundzillii Besser	Rosa marginata Wallr.	Wild	Angiosperm	Rosaceae	Dicot	Bicellular	Dry	Starchy and starchless	Wronska-Pilarek	2010	1	https://pdfs.semanticscholar.org/d9cf/f7007387bde352611291647a116164a62143.pdf?_ga=2.84240409.1668351677.1590479101-218708052.1585738021	Wrońska-Pilarek & Tomlik-Wyremblewska, 2010	0.015	0.1
999	Rosa micrantha	Rosa micrantha Borrer ex Sm.	Wild	Angiosperm	Rosaceae	Dicot	Bicellular	Dry	Starchy and starchless	Wronska-Pilarek	2010	1	https://pdfs.semanticscholar.org/d9cf/f7007387bde352611291647a116164a62143.pdf?_ga=2.84240409.1668351677.1590479101-218708052.1585738021	Wrońska-Pilarek & Tomlik-Wyremblewska, 2010	0	0.2
1000	Rosa mollis	Rosa mollis Sm.	Wild	Angiosperm	Rosaceae	Dicot	Bicellular	Dry	Starchy and starchless	Wronska-Pilarek	2010	1	https://pdfs.semanticscholar.org/d9cf/f7007387bde352611291647a116164a62143.pdf?_ga=2.84240409.1668351677.1590479101-218708052.1585738021	Wrońska-Pilarek & Tomlik-Wyremblewska, 2010	0	0.15	0.81
1001	Rosa rubiginosa	Rosa rubiginosa L.	Wild	Angiosperm	Rosaceae	Dicot	Bicellular	Dry	Starchy and starchless	Wronska-Pilarek	2010	1	https://pdfs.semanticscholar.org/d9cf/f7007387bde352611291647a116164a62143.pdf?_ga=2.84240409.1668351677.1590479101-218708052.1585738021	Wrońska-Pilarek & Tomlik-Wyremblewska, 2010	0	0.15
1002	Rosa sherardii	Rosa sherardii Davies	Wild	Angiosperm	Rosaceae	Dicot	Bicellular	Dry	Starchy and starchless	Wronska-Pilarek	2010	1	https://pdfs.semanticscholar.org/d9cf/f7007387bde352611291647a116164a62143.pdf?_ga=2.84240409.1668351677.1590479101-218708052.1585738021	Wrońska-Pilarek & Tomlik-Wyremblewska, 2010	0	0.1
1003	Rosa tomentosa	Rosa tomentosa Sm.	Wild	Angiosperm	Rosaceae	Dicot	Bicellular	Dry	Starchy and starchless	Wronska-Pilarek	2010	1	https://pdfs.semanticscholar.org/d9cf/f7007387bde352611291647a116164a62143.pdf?_ga=2.84240409.1668351677.1590479101-218708052.1585738021	Wrońska-Pilarek & Tomlik-Wyremblewska, 2010	0	0.2
1004	Rosa villosa L.	Rosa villosa L.	Wild	Angiosperm	Rosaceae	Dicot	Bicellular	Dry	Starchy and starchless	Wronska-Pilarek	2010	1	https://pdfs.semanticscholar.org/d9cf/f7007387bde352611291647a116164a62143.pdf?_ga=2.84240409.1668351677.1590479101-218708052.1585738021	Wrońska-Pilarek & Tomlik-Wyremblewska, 2010	0	0.2	0.81
1005	Rosa zalana	Rosa zalana Wiesb.	Wild	Angiosperm	Rosaceae	Dicot	Bicellular	Dry	Starchy and starchless	Wronska-Pilarek	2010	1	https://pdfs.semanticscholar.org/d9cf/f7007387bde352611291647a116164a62143.pdf?_ga=2.84240409.1668351677.1590479101-218708052.1585738021	Wrońska-Pilarek & Tomlik-Wyremblewska, 2010	0	0.2
1006	Rosa gallica L.	Rosa gallica L.	Wild	Angiosperm	Rosaceae	Dicot	Bicellular	Dry	Starchy and starchless	Wronska-Pilarek	2010	1	https://pdfs.semanticscholar.org/d9cf/f7007387bde352611291647a116164a62143.pdf?_ga=2.84240409.1668351677.1590479101-218708052.1585738021	Wrońska-Pilarek & Tomlik-Wyremblewska, 2010	0	0.15
1007	Rosa gallica L.	Rosa gallica L.	Wild	Angiosperm	Rosaceae	Dicot	Bicellular	Dry	Starchy and starchless	Wronska-Pilarek	2010	1	https://pdfs.semanticscholar.org/d9cf/f7007387bde352611291647a116164a62143.pdf?_ga=2.84240409.1668351677.1590479101-218708052.1585738021	Wrońska-Pilarek & Tomlik-Wyremblewska, 2010	0.015	0.1	0.81
1008	Actinidia chinensis var. deliciosa (A.Chev.) A.Chev.	Actinidia deliciosa (A.Chev.) C.F.Liang & A.R.Ferguson	Cultivated	Angiosperm	Actinidiaceae	Dicot	Bicellular	Dry	NA	Borghezan	2011	1	https://www.scielo.br/pdf/cbab/v11n4/a07v11n4.pdf	Borghezan et al., 2011	0.01	0.12	0.81
1009	Prunus dulcis	Prunus dulcis (Mill.) D.A.Webb	Cultivated	Angiosperm	Rosaceae	Dicot	Bicellular	Wet	Starchy and starchless	Sharafi	2011	1	http://citeseerx.ist.psu.edu/viewdoc/download?doi=10.1.1.947.8937&rep=rep1&type=pdf	Sharafi, 2011a	0.01	0.15	0.09
1010	Prunus armeniaca	Prunus armeniaca L.	Cultivated	Angiosperm	Rosaceae	Dicot	Bicellular	Wet	Starchy and starchless	Sharafi	2011	1	http://citeseerx.ist.psu.edu/viewdoc/download?doi=10.1.1.947.8937&rep=rep1&type=pdf	Sharafi, 2011a	0.01	0.15	0.09
1011	Prunus domestica	Prunus domestica L.	Cultivated	Angiosperm	Rosaceae	Dicot	Bicellular	Wet	Starchy and starchless	Sharafi	2011	1	http://citeseerx.ist.psu.edu/viewdoc/download?doi=10.1.1.947.8937&rep=rep1&type=pdf	Sharafi, 2011a	0.01	0.15	0.09
1012	Prunus salisina	Prunus salicina Lindl.	Cultivated	Angiosperm	Rosaceae	Dicot	Bicellular	Wet	Starchy and starchless	Sharafi	2011	1	http://citeseerx.ist.psu.edu/viewdoc/download?doi=10.1.1.947.8937&rep=rep1&type=pdf	Sharafi, 2011a	0.01	0.15	0.09
1013	Prunus cerasus	Prunus cerasus L.	Cultivated	Angiosperm	Rosaceae	Dicot	Bicellular	Wet	Starchy and starchless	Sharafi	2011	1	http://citeseerx.ist.psu.edu/viewdoc/download?doi=10.1.1.947.8937&rep=rep1&type=pdf	Sharafi, 2011a	0.01	0.15	0.09
1014	Prunus avium	Prunus avium (L.) L.	Cultivated	Angiosperm	Rosaceae	Dicot	Bicellular	Wet	Starchy and starchless	Sharafi	2011	1	http://citeseerx.ist.psu.edu/viewdoc/download?doi=10.1.1.947.8937&rep=rep1&type=pdf	Sharafi, 2011a	0.01	0.15	0.09
1015	Prunus dulcis	Prunus dulcis (Mill.) D.A.Webb	Cultivated	Angiosperm	Rosaceae	Dicot	Bicellular	Wet	Starchy and starchless	Zarrabi	2011	1	http://citeseerx.ist.psu.edu/viewdoc/download?doi=10.1.1.1015.2783&rep=rep1&type=pdf	Zarrabi, 2011	0.01	0.15	1.62
1016	Scutellaria baicalensis	Scutellaria baicalensis Georgi	Wild	Angiosperm	Lamiaceae	Dicot	Bicellular	Dry	NA	Liu	2011	0	http://apps.webofknowledge.com/full_record.do?product=UA&search_mode=GeneralSearch&qid=7&SID=E6AjcFeE8716M44ZUTj&page=1&doc=9&cacheurlFromRightClick=no	Liu et al., 2011		0.1
1017	Ananas macrodontes E.Morren	Ananas sagenaria (Arruda) Schult. & Schult.f.	Cultivated	Angiosperm	Bromeliaceae	Monocot	Bicellular	Wet	Starchless	Soares	2011	1	https://www.scielo.br/pdf/cr/v41n10/a12811cr5596.pdf	Soares et al., 2011	0.01	0.1	1.62			1.28 (4H2O)										0.99
1018	Ananas comosus var. erectifolius (L.B.Sm.) Coppens & F.Leal	Ananas lucidus Mill.	Cultivated	Angiosperm	Bromeliaceae	Monocot	Bicellular	Wet	Starchless	Soares	2011	1	https://www.scielo.br/pdf/cr/v41n10/a12811cr5596.pdf	Soares et al., 2011	0.01	0.1	1.62			1.28 (4H2O)										0.99
1019	Ananas comosus var. bracteatus (Lindl.) Coppens & F.Leal	Ananas bracteatus (Lindl.) Schult. & Schult.f.	Cultivated	Angiosperm	Bromeliaceae	Monocot	Bicellular	Wet	Starchless	Soares	2011	1	https://www.scielo.br/pdf/cr/v41n10/a12811cr5596.pdf	Soares et al., 2011	0.01	0.1	1.62			1.28 (4H2O)										0.99
1020	Zea mays subsp. mays	Zea mays L.	Cultivated	Angiosperm	Poaceae	Monocot	Tricellular	Dry	NA	Almeida	2011	1	https://www.scielo.br/pdf/rbb/v34n4/v34n4a03.pdf	Almeida et al., 2011	0.007	0.17	1.62								2.05 (2H2O)
1021	Passiflora capsularis	Passiflora capsularis L.	Wild	Angiosperm	Passifloraceae	Dicot	Bicellular	Dry	NA	Amorim	2011	1	https://www.scielo.br/pdf/rbb/v34n4/v34n4a07.pdf	Amorim et al., 2011		0.05	1.62			4.86 (4H2O)						0.82 (7H2O)				0.99
1022	Passiflora rubra	Passiflora rubra L.	Wild	Angiosperm	Passifloraceae	Dicot	Bicellular	Dry	NA	Amorim	2011	1	https://www.scielo.br/pdf/rbb/v34n4/v34n4a07.pdf	Amorim et al., 2011		0.05	1.62			4.86 (4H2O)						0.82 (7H2O)				0.99
1023	Prunus dulcis	Prunus dulcis (Mill.) D.A.Webb	Wild	Angiosperm	Rosaceae	Dicot	Bicellular	Wet	Starchy and starchless	Sorkheh	2011	1	https://link.springer.com/article/10.1007/s00468-011-0557-7#Tab1	Sorkheh et al., 2011	0.02	0.001	16.18			15.24						16.62				9.9
1024	Prunus eleaegnifolia	Prunus elaeagnifolia (Spach) A.E.Murray	Wild	Angiosperm	Rosaceae	Dicot	Bicellular	Wet	Starchy and starchless	Sorkheh	2011	1	https://link.springer.com/article/10.1007/s00468-011-0557-7#Tab1	Sorkheh et al., 2011	0.02	0.001	16.18			15.24						16.62				9.9
1025	Prunus orientalis	Prunus orientalis (Mill.) Koehne	Wild	Angiosperm	Rosaceae	Dicot	Bicellular	Wet	Starchy and starchless	Sorkheh	2011	1	https://link.springer.com/article/10.1007/s00468-011-0557-7#Tab1	Sorkheh et al., 2011	0.02	0.001	16.18			15.24						16.62				9.9
1026	Prunus lycioides	Prunus lycioides (Spach) C.K.Schneid.	Wild	Angiosperm	Rosaceae	Dicot	Bicellular	Wet	Starchy and starchless	Sorkheh	2011	1	https://link.springer.com/article/10.1007/s00468-011-0557-7#Tab1	Sorkheh et al., 2011	0.02	0.001	16.18			15.24						16.62				9.9
1027	Prunus reuteri	Prunus	Wild	Angiosperm	Rosaceae	Dicot	Bicellular	Wet	Starchy and starchless	Sorkheh	2011	1	https://link.springer.com/article/10.1007/s00468-011-0557-7#Tab1	Sorkheh et al., 2011	0.02	0.001	16.18			15.24						16.62				9.9
1028	Prunus arabica	Prunus arabica (Olivier) Meikle	Wild	Angiosperm	Rosaceae	Dicot	Bicellular	Wet	Starchy and starchless	Sorkheh	2011	1	https://link.springer.com/article/10.1007/s00468-011-0557-7#Tab1	Sorkheh et al., 2011	0.02	0.001	16.18			15.24						16.62				9.9
1029	Prunus glauca	Prunus glauca (Browicz) A.E.Murray	Wild	Angiosperm	Rosaceae	Dicot	Bicellular	Wet	Starchy and starchless	Sorkheh	2011	1	https://link.springer.com/article/10.1007/s00468-011-0557-7#Tab1	Sorkheh et al., 2011	0.02	0.001	16.18			15.24						16.62				9.9
1030	Prunus scoparia	Prunus scoparia (Spach) C.K.Schneid.	Wild	Angiosperm	Rosaceae	Dicot	Bicellular	Wet	Starchy and starchless	Sorkheh	2011	1	https://link.springer.com/article/10.1007/s00468-011-0557-7#Tab1	Sorkheh et al., 2011	0.02	0.001	16.18			15.24						16.62				9.9
1031	Brassica napus L.	Brassica napus L.	Cultivated	Angiosperm	Brassicaceae	Dicot	Tricellular	Dry	NA	Watrud	2011	1	https://link.springer.com/article/10.1007%2Fs11627-011-9400-5	Watrud et al., 2011	1% BactoAgar	0.2	1.6			1.3 (4H2O)						0.8 (7H2O)				1
1032	Brassica rapa	Brassica rapa L.	Wild	Angiosperm	Brassicaceae	Dicot	Tricellular	Dry	NA	Watrud	2011	1	https://link.springer.com/article/10.1007%2Fs11627-011-9400-5	Watrud et al., 2011	1% BactoAgar	0.2	1.6			1.3 (4H2O)						0.8 (7H2O)				1
1033	Raphanus sativus L.	Raphanus raphanistrum subsp. sativus (L.) Domin	Cultivated	Angiosperm	Brassicaceae	Dicot	Tricellular	Dry	NA	Watrud	2011	1	https://link.springer.com/article/10.1007%2Fs11627-011-9400-5	Watrud et al., 2011	1% BactoAgar	0.2	1.6			1.3 (4H2O)						0.8 (7H2O)				1
1034	Sinapis arvensis	Sinapis arvensis L.	Wild	Angiosperm	Brassicaceae	Dicot	Tricellular	Dry	NA	Watrud	2011	1	https://link.springer.com/article/10.1007%2Fs11627-011-9400-5	Watrud et al., 2011	1% BactoAgar	0.2	1.6			1.3 (4H2O)						0.8 (7H2O)				1
1035	Persea americana Mill.	Persea americana Mill.	Cultivated	Angiosperm	Lauraceae	Dicot	Bicellular	Dry	NA	Alcaraz	2011	1	https://kundoc.com/pdf-in-vitro-pollen-germination-in-avocado-persea-americana-mill-optimization-of-the.html	Alcaraz et al., 2011		0.1	1.62			2.04 (4H2O)						1.22 (7H2O)				0.99
1036	Eriobotria japonica Lindl.	Eriobotrya japonica (Thunb.) Lindl.	Cultivated	Angiosperm	Rosaceae	Dicot	Bicellular	Wet	Starchy and starchless	Sharafi	2011	1	https://academicjournals.org/journal/AJB/article-full-text-pdf/650200C26124	Yavar et al., 2011	0.01	0.1	1.62
1037	Jasminum sambuc	Jasminum sambac (L.) Aiton	Cultivated	Angiosperm	Oleaceae	Dicot	Bicellular	Dry	NA	Perveen	2011	1	http://www.pakbs.org/pjbot/PDFs/43(4)/PJB43(4)2109.pdf	Perveen & Sarwar, 2011	0	0.1	1.62			1.27						0.81				0.99
1038	Nycanthes arbortritis	Nyctanthes arbor-tristis L.	Wild	Angiosperm	Oleaceae	Dicot	Bicellular	Dry	NA	Perveen	2011	1	http://www.pakbs.org/pjbot/PDFs/43(4)/PJB43(4)2109.pdf	Perveen & Sarwar, 2011	0	0.1	1.62			1.27						0.81				0.99
1039	Prunus persica	Prunus persica (L.) Batsch	Cultivated	Angiosperm	Rosaceae	Dicot	Bicellular	Wet	Starchy and starchless	Sharafi	2011	1	https://academicjournals.org/article/article1380116299_Sharafi.pdf	Sharafi, 2011b	0.012	0.14
1040	Prunus dulcis	Prunus dulcis (Mill.) D.A.Webb	Cultivated	Angiosperm	Rosaceae	Dicot	Bicellular	Wet	Starchy and starchless	Sutyemez	2011	1	https://www.researchgate.net/profile/M_Sutyemez/publication/267405748_Pollen_quality_and_pollen_production_in_some_almond_culvitars_under_Kaharamanmaras_Turkey_ecological_conditions/links/5db69497a6fdccc99da8b92a/Pollen-quality-and-pollen-production-in-some-almond-culvitars-under-Kaharamanmaras-Turkey-ecological-conditions.pdf	Sutyemez, 2011	0.01	0.15
1041	Vitellaria paradoxa	Vitellaria paradoxa C.F.Gaertn.	Cultivated	Angiosperm	Sapotaceae	Dicot	NA	Dry	NA	Youmbi	2011	1	https://core.ac.uk/download/pdf/26939306.pdf	Youmbi et al., 2011		0.1
1042	Steganotaenia araliaceae	Steganotaenia araliacea Hochst.	Wild	Angiosperm	Apiaceae	Dicot	Tricellular	Wet	NA	Youmbi	2011	1	https://core.ac.uk/download/pdf/26939306.pdf	Youmbi et al., 2011		0.15
1043	Impatiens cuspidata Wight & Arn.	Impatiens cuspidata Wight & Arn.	Wild	Angiosperm	Balsaminaceae	Dicot	Bicellular	Wet	Starchy	Sreekala	2011	1	https://threatenedtaxa.org/index.php/JoTT/article/view/655/1149	Sreekala et al., 2011		0.02
1044	Malus pumila	Malus pumila Mill.	Cultivated	Angiosperm	Rosaceae	Dicot	Bicellular	Wet	Starchy and starchless	Sharafi	2011	1	http://research.shahed.ac.ir/WSR/SiteData/PaperFiles/7008_778630848.pdf	Sharafi, 2011c	0.01	0.16	0.07
1045	Pyrus commonis	Pyrus communis L.	Cultivated	Angiosperm	Rosaceae	Dicot	Bicellular	Wet	Starchy and starchless	Sharafi	2011	1	http://research.shahed.ac.ir/WSR/SiteData/PaperFiles/7008_778630848.pdf	Sharafi, 2011c	0.01	0.16	0.07
1046	Cydonia oblonga	Cydonia oblonga Mill.	Cultivated	Angiosperm	Rosaceae	Dicot	Bicellular	Wet	Starchy and starchless	Sharafi	2011	1	http://research.shahed.ac.ir/WSR/SiteData/PaperFiles/7008_778630848.pdf	Sharafi, 2011c	0.01	0.16	0.07
1047	Paeonia tenuifolia L.	Paeonia tenuifolia L.	Wild	Angiosperm	Paeoniaceae	Dicot	Bicellular	Wet	Starchless	Dane	2011	1	https://www.banglajol.info/index.php/BJB/article/view/8003	Dane & Ekici, 2011	0	0.1	1.62
1048	Platonia insignis	Platonia insignis Mart.	Cultivated	Angiosperm	Clusiaceae	Dicot	NA	NA	NA	Sinimbu Neto	2011	1	https://www.scielo.br/pdf/rbf/v33n2/AOP%2004711.pdf	Sinimbú Neto et al., 2011	0.005	0.075
1049	Vitis vinifera	Vitis vinifera L.	Cultivated	Angiosperm	Vitaceae	Dicot	Bicellular	Dry	Starchless	Sharafi	2011	1	http://research.shahed.ac.ir/WSR/SiteData/PaperFiles/7012_779075272.pdf	Sharafi, 2011c	0.01	0.15	0.81
1050	Musa acuminata	Musa acuminata Colla	Cultivated	Angiosperm	Musaceae	Monocot	Bicellular	Wet	Starchless	Reis	2011	1	https://www.researchgate.net/publication/262460810_In_vitro_viability_of_banana_pollen_grain_under_different_concentrations_of_boric_acid_and_sucrose	Reis et al., 2011	0.007	0.15	4.45			1.27 (2H2O)						0.87 (7H2O)				0.99
1051	Carya illinoinensis	Carya illinoinensis (Wangenh.) K.Koch	Wild	Angiosperm	Juglandaceae	Dicot	Bicellular	Dry	Starchless	Conner	2011	1	https://journals.ashs.org/hortsci/view/journals/hortsci/46/4/article-p571.xml	Conner, 2011		0.05	4.05			3.05										0.5																			10 MES
1052	Lilium longiflorum	Lilium longiflorum Thunb.	Wild	Angiosperm	Liliaceae	Monocot	Bicellular	Wet	Starchless	Wang	2011	1	https://www.nature.com/articles/nprot.2011.309#Tab1	Wang & Jiang, 2011	0	0.1	1.3								9.9					2.9
1053	Nicotiana tabacum	Nicotiana tabacum L.	Cultivated	Angiosperm	Solanaceae	Dicot	Bicellular	Wet	Starchy and starchless	Wang	2011	1	https://www.nature.com/articles/nprot.2011.309#Tab1	Wang & Jiang, 2011	0	0.1	1.62			1 (4H2O)					1	1 (7H2O)
1054	Arabidopsis thaliana	Arabidopsis thaliana (L.) Heynh.	Cultivated	Angiosperm	Brassicaceae	Dicot	Tricellular	Dry	NA	Wang	2011	1	https://www.researchgate.net/publication/50409824_Transient_expression_and_analysis_of_fluorescent_reporter_proteins_in_plant_pollen_tubes	Wang & Jiang, 2011	0	0.1	1.62								5	1							5
1055	Malus domestica	Malus domestica Borkh.	Cultivated	Angiosperm	Rosaceae	Dicot	Bicellular	Wet	Starchy and starchless	Imani	2011	1	https://academicjournals.org/article/article1381420253_Imani%20et%20al.pdf	Imani et al., 2011	0.01	0.15	1.62			1.83
1056	Prunus amygdalus Batsch	Prunus dulcis (Mill.) D.A.Webb	Cultivated	Angiosperm	Rosaceae	Dicot	Bicellular	Wet	Starchy and starchless	Sharafi	2011	1	https://www.researchgate.net/profile/Yavar_Sharafi/publication/228834018_In_vitro_study_of_pollen_traits_after_short_storage_in_some_almond_apricot_and_sweet_cherry_favorable_genotypes/links/5453fe820cf2cf51647c2864/In-vitro-study-of-pollen-traits-after-short-storage-in-some-almond-apricot-and-sweet-cherry-favorable-genotypes.pdf	Sharafi, 2011d	0.012	0.1
1057	Prunus armeniaca	Prunus armeniaca L.	Cultivated	Angiosperm	Rosaceae	Dicot	Bicellular	Wet	Starchy and starchless	Sharafi	2011	1	https://www.researchgate.net/profile/Yavar_Sharafi/publication/228834018_In_vitro_study_of_pollen_traits_after_short_storage_in_some_almond_apricot_and_sweet_cherry_favorable_genotypes/links/5453fe820cf2cf51647c2864/In-vitro-study-of-pollen-traits-after-short-storage-in-some-almond-apricot-and-sweet-cherry-favorable-genotypes.pdf	Sharafi, 2011d	0.012	0.1
1058	Prunus avium	Prunus avium (L.) L.	Cultivated	Angiosperm	Rosaceae	Dicot	Bicellular	Wet	Starchy and starchless	Sharafi	2011	1	https://www.researchgate.net/profile/Yavar_Sharafi/publication/228834018_In_vitro_study_of_pollen_traits_after_short_storage_in_some_almond_apricot_and_sweet_cherry_favorable_genotypes/links/5453fe820cf2cf51647c2864/In-vitro-study-of-pollen-traits-after-short-storage-in-some-almond-apricot-and-sweet-cherry-favorable-genotypes.pdf	Sharafi, 2011d	0.012	0.1
1059	Jatropha ribifolia	Jatropha ribifolia (Pohl) Baill.	Wild	Angiosperm	Euphorbiaceae	Dicot	Bicellular	Dry	Starchy	Lyra	2011	1	https://www.researchgate.net/publication/228490184_Pollen_viability_and_germination_in_Jatropha_ribifolia_and_Jatropha_mollissima_Euphorbiaceae_Species_with_potential_for_biofuel_production	Lyra et al., 2011	0.01	0.1
1060	Jatropha mollissima	Jatropha mollissima (Pohl) Baill.	Wild	Angiosperm	Euphorbiaceae	Dicot	Bicellular	Dry	Starchy	Lyra	2011	1	https://www.researchgate.net/publication/228490184_Pollen_viability_and_germination_in_Jatropha_ribifolia_and_Jatropha_mollissima_Euphorbiaceae_Species_with_potential_for_biofuel_production	Lyra et al., 2011	0.01	0.1
1061	Punica granatum L.	Punica granatum L.	Cultivated	Angiosperm	Lythraceae	Dicot	Bicellular	Dry	Starchy and starchless	Gadze	2011	1	http://www.hortorumcultus.actapol.net/pub/10_3_297.pdf	Gadze et al., 2011	0.002	0.1	0.09
1062	Actinidia deliciosa var. deliciosa	Actinidia deliciosa (A.Chev.) C.F.Liang & A.R.Ferguson	Cultivated	Angiosperm	Actinidiaceae	Dicot	Bicellular	Dry	NA	Speranza	2011	1	https://onlinelibrary.wiley.com/doi/full/10.1111/j.1438-8677.2010.00330.x	Speranza et al., 2011	0	0.099	0.4
1063	Acacia mearnsii	Acacia mearnsii De Wildeman	Wild	Angiosperm	Fabaceae	Dicot	Bicellular	Wet	NA	Beck-Pay	2012	1	https://www.sciencedirect.com/science/article/pii/S0254629912001378?via%3Dihub	Beck-Pay, 2012
1064	Citrus deliciosa Ten.	Citrus reticulata Blanco	Cultivated	Angiosperm	Rutaceae	Dicot	Bicellular	Wet	Starchy and starchless	Aleza	2012	1	https://link.springer.com/article/10.1007/s00299-012-1286-0#Tab1	Aleza et al., 2012	0.8% (Bacto agar)	0.03
1065	Citrus sinensis	Citrus sinensis (L.) Osbeck	Cultivated	Angiosperm	Rutaceae	Dicot	Bicellular	Wet	Starchy and starchless	Aleza	2012	1	https://link.springer.com/article/10.1007/s00299-012-1286-0#Tab1	Aleza et al., 2012	0.8% (Bacto agar)	0.03
1066	Chimonanthus praecox	Chimonanthus praecox (L.) Link	Wild	Angiosperm	Calycanthaceae	Dicot	Bicellular	Dry	Starchy and starchless	Gong Shuang-Jiao	2012	0	https://www.cabdirect.org/cabdirect/abstract/20123262385	Gong et al., 2012	0		0.81			0.13 (4H2O)
1067	Taxus media	Taxus × media Rehder	Cultivated	Gymnosperm	Taxaceae				NA	Wang Cheng-Wei	2012	0	https://www.cabdirect.org/cabdirect/abstract/20123236748	Wang et al., 2012		0.15	1.62			1.22
1068	Bauhinia blakeana	Bauhinia blakeana Dunn	Cultivated	Angiosperm	Fabaceae	Dicot	Bicellular	Wet	NA	Deng	2012	1	https://bioone.org/journals/Annales-Botanici-Fennici/volume-49/issue-2/085.049.0101/Generative-and-Sperm-Cell-Isolation-in-Bauhinia-blakeana-Fabaceae/10.5735/085.049.0101.full	Deng et al., 2012	0	0.1	1.62								4.51							0.74
1069	Citrus tamurana	Citrus tamurana Tanaka	Cultivated	Angiosperm	Rutaceae	Dicot	Bicellular	Wet	Starchy and starchless	Uchida	2012	1	https://www.jstage.jst.go.jp/article/hrj/11/2/11_173/_pdf	Uchida et al., 2012	0	0.1	1.62								3.61							0.06
1070	Tanacetum vulgare	Tanacetum vulgare L.	Wild	Angiosperm	Asteraceae	Dicot	Tricellular	Dry	NA	Devrnja	2012	1	https://www.researchgate.net/publication/289035541_Pollen_Morphology_Viability_and_Germination_of_Tanacetum_vulgare_L	Devrnja et al., 2012	0.015	0.3	485.21
1071	Jatropha curcas	Jatropha curcas L.	Cultivated	Angiosperm	Euphorbiaceae	Dicot	Bicellular	Dry	Starchy	Abdelgadir	2012	1	https://www.sciencedirect.com/science/article/pii/S0254629911001360?via%3Dihub	Abdelgadir et al., 2012	0.01	0	0.7			1.3 (4H2O)
1072	Rhododendron simsii	Rhododendron simsii Planch.	Cultivated	Angiosperm	Ericaceae	Dicot	Bicellular	Wet	Starchless	Zhang Chao-Yi	2012	0	http://apps.webofknowledge.com/full_record.do?product=UA&search_mode=GeneralSearch&qid=3&SID=C3NE2aHlKOaZjzsqSGw&page=3&doc=29&cacheurlFromRightClick=no	Zhang & Geng, 2012		0.1	1.62
1073	Rhododendron ovatum	Rhododendron ovatum (Lindl.) Planch. ex Maxim.	Cultivated	Angiosperm	Ericaceae	Dicot	Bicellular	Wet	Starchless	Zhang Chao-Yi	2012	0	http://apps.webofknowledge.com/full_record.do?product=UA&search_mode=GeneralSearch&qid=3&SID=C3NE2aHlKOaZjzsqSGw&page=3&doc=29&cacheurlFromRightClick=no	Zhang & Geng, 2012		0.05	3.24
1074	Rhododendron hybridum	Rhododendron × hybridum Ker Gawl.	Cultivated	Angiosperm	Ericaceae	Dicot	Bicellular	Wet	Starchless	Zhang Chao-Yi	2012	0	http://apps.webofknowledge.com/full_record.do?product=UA&search_mode=GeneralSearch&qid=3&SID=C3NE2aHlKOaZjzsqSGw&page=3&doc=29&cacheurlFromRightClick=no	Zhang & Geng, 2012		0.15	1.62
1075	Cucurbita pepo subsp. pepo	Cucurbita pepo L.	Cultivated	Angiosperm	Cucurbitaceae	Dicot	Bicellular	Dry	Starchy and starchless	Kosmrlj	2012	1	https://www.cabdirect.org/cabdirect/FullTextPDF/2013/20133109883.pdf	Kosmrlj et al., 2012	0	0.1	1.62			1.27						0.81				0.99
1076	Quercus robur	Quercus robur L.	Wild	Angiosperm	Fagaceae	Dicot	Bicellular	Dry	Starchless	Batos	2012	1	http://ibiss-r.rcub.bg.ac.rs/bitstream/handle/123456789/294/Rad_konverzija_354.pdf?sequence=1&isAllowed=y	Batos et al., 2012	0	0.15
1077	Solanum melongena L.	Solanum melongena L.	Cultivated	Angiosperm	Solanaceae	Dicot	Bicellular	Wet	Starchy and starchless	Araméndiz Tatis	2012	1	https://www.redalyc.org/pdf/1799/179925831020.pdf	Araméndiz Tatis et al., 2012	0.01	0.1	1.95			2.12 (4H2O)						1				0.99
1078	Ricinus communis L.	Ricinus communis L.	Cultivated	Angiosperm	Euphorbiaceae	Dicot	Bicellular	Dry	Starchy	Cuchiara	2012	0	https://www.cabdirect.org/cabdirect/abstract/20123143280	Cuchiara et al., 2012	0.01	0.1	0.07
1079	Acacia podalyriifolia	Acacia podalyriifolia Cunn. ex Don	Cultivated	Angiosperm	Fabaceae	Dicot	Bicellular	Wet	NA	Beck-Pay	2012	1	https://www.sciencedirect.com/science/article/pii/S0254629911001098?via%3Dihub	Beck-Pay, 2012		0.3
1080	Bixa orellana	Bixa orellana L.	Cultivated	Angiosperm	Bixaceae	Dicot	Bicellular	Wet	NA	Joseph	2012	1	https://link.springer.com/article/10.1007%2Fs00606-011-0541-0	Joseph et al., 2012		0.15
1081	Passiflora suberosa	Passiflora suberosa L.	Wild	Angiosperm	Passifloraceae	Dicot	Bicellular	Dry	NA	Soares	2013	1	https://www.scielo.br/pdf/rbf/v35n4/a23v35n4.pdf	Soares & Oliveira, 2013	0.008	0.15	1.62			1.28 (4H2O)						0.82 (7H2O)				0.99
1082	Passiflora cincinnata	Passiflora cincinnata Mast.	Wild	Angiosperm	Passifloraceae	Dicot	Bicellular	Dry	NA	Soares	2013	1	https://www.scielo.br/pdf/rbf/v35n4/a23v35n4.pdf	Soares & Oliveira, 2013	0.008	0.15	1.62			1.28 (4H2O)						0.82 (7H2O)				0.99
1083	Passiflora edulis	Passiflora edulis Sims	Wild	Angiosperm	Passifloraceae	Dicot	Bicellular	Dry	NA	Soares	2013	1	https://www.scielo.br/pdf/rbf/v35n4/a23v35n4.pdf	Soares & Oliveira, 2013	0.008	0.15	1.62			1.28 (4H2O)						0.82 (7H2O)				0.99
1084	Passiflora edmundoi	Passiflora edmundoi Sacco	Wild	Angiosperm	Passifloraceae	Dicot	Bicellular	Dry	NA	Soares	2013	1	https://www.scielo.br/pdf/rbf/v35n4/a23v35n4.pdf	Soares & Oliveira, 2013	0.008	0.15	1.62			1.28 (4H2O)						0.82 (7H2O)				0.99
1085	Passiflora galbana	Passiflora galbana Mast.	Wild	Angiosperm	Passifloraceae	Dicot	Bicellular	Dry	NA	Soares	2013	1	https://www.scielo.br/pdf/rbf/v35n4/a23v35n4.pdf	Soares & Oliveira, 2013	0.008	0.15	1.62			1.28 (4H2O)						0.82 (7H2O)				0.99
1086	Passiflora gibertii	Passiflora gibertii N.E. Br.	Wild	Angiosperm	Passifloraceae	Dicot	Bicellular	Dry	NA	Soares	2013	1	https://www.scielo.br/pdf/rbf/v35n4/a23v35n4.pdf	Soares & Oliveira, 2013	0.008	0.15	1.62			1.28 (4H2O)						0.82 (7H2O)				0.99
1087	Picea wilsonii	Picea wilsonii Mast.	Cultivated	Gymnosperm	Pinaceae				NA	Ling	2013	1	https://link.springer.com/article/10.1007%2Fs00425-013-1938-5	Ling et al., 2013		12 %	1.62								0.91
1088	Passiflora edulis f. flavicarpa	Passiflora edulis fo. flavicarpa O. Deg.	Wild	Angiosperm	Passifloraceae	Dicot	Bicellular	Dry	NA	Soares	2013	1	https://www.scielo.br/pdf/abb/v27n4/18.pdf	Soares et al., 2013	0.008	0.15	1.62			1.28 (4H2O)						0.82 (7H2O)				0.99
1089	Passiflora setacea	Passiflora setacea DC.	Wild	Angiosperm	Passifloraceae	Dicot	Bicellular	Dry	NA	Soares	2013	1	https://www.scielo.br/pdf/abb/v27n4/18.pdf	Soares et al., 2013	0.008	0.15	1.62			1.28 (4H2O)						0.82 (7H2O)				0.99
1090	Gloriosa superba	Gloriosa superba L.	Cultivated	Angiosperm	Colchicaceae	Monocot	Bicellular	Dry	NA	Gopinath	2013	1	https://www.researchgate.net/publication/264048494_Green_synthesis_of_gold_nanoparticles_from_leaf_extract_of_Terminalia_arjuna_for_the_enhanced_mitotic_cell_division_and_pollen_germination_activity	Gopinath et al., 2013		0.1	1.62
1091	Rubus spp.	Rubus sp.	Cultivated	Angiosperm	Rosaceae	Dicot	Bicellular	Dry	Starchy and starchless	De Figueiredo	2013	1	https://www.scielo.br/pdf/pab/v48n7/05.pdf	Figueiredo et al., 2013	0.008	0.09	6.47
1092	Cyamopsis tetragonoloba	Cyamopsis tetragonoloba (L.)Taub.	Cultivated	Angiosperm	Fabaceae	Dicot	Bicellular	Wet	NA	Ahlawat	2013	0	https://www.cabdirect.org/cabdirect/abstract/20133280943	Ahlawat et al., 2013		0.25	1.62			1.83
1093	Cyamopsis serrata	Cyamopsis serrata Schinz	Cultivated	Angiosperm	Fabaceae	Dicot	Bicellular	Wet	NA	Ahlawat	2013	0	https://www.cabdirect.org/cabdirect/abstract/20133280943	Ahlawat et al., 2013		35% maltose	1.62			1.83
1094	Cyamopsis senegalensis	Cyamopsis senegalensis Guill. & Perr.	Cultivated	Angiosperm	Fabaceae	Dicot	Bicellular	Wet	NA	Ahlawat	2013	0	https://www.cabdirect.org/cabdirect/abstract/20133280943	Ahlawat et al., 2013		0.35	1.62			1.83
1095	Cajanus cinereus	Cajanus cinereus (F.Muell.)F.Muell.	Wild	Angiosperm	Fabaceae	Dicot	Bicellular	Wet	NA	Jayaprakash	2013	1	http://www.isgpb.org/documents/archive/art-13-211-215.pdf	Jayaprakash & Sabesan, 2013		0.3	3.64			1.22
1096	Rhynchosia rothii	Rhynchosia rothii Aitch.	Wild	Angiosperm	Fabaceae	Dicot	Bicellular	Wet	NA	Jayaprakash	2013	1	http://www.isgpb.org/documents/archive/art-13-211-215.pdf	Jayaprakash & Sabesan, 2013		0.3	3.24			0.92
1097	Rhynchosia aureus	Rhynchosia aurea (Willd.)DC.	Wild	Angiosperm	Fabaceae	Dicot	Bicellular	Wet	NA	Jayaprakash	2013	1	http://www.isgpb.org/documents/archive/art-13-211-215.pdf	Jayaprakash & Sabesan, 2013		0.2	1.62			1.83
1098	Nymphaea nouchali var. versicolor	Nymphaea nouchali var. versicolor (Sims) R.Ansari & Jeeja	Cultivated	Angiosperm	Nymphaeaceae	Dicot	Bicellular	Dry	Starchless	Bodhipadma	2013	1	http://www.scienceasia.org/2013.39.n2/scias39_214.pdf	Bodhipadma et al., 2013	0.009	0.05	0.1								1
1099	Saccharum officinarum	Saccharum officinarum L.	Cultivated	Angiosperm	Poaceae	Monocot	Tricellular	Dry	NA	Melloni	2013	1	https://link.springer.com/article/10.1007%2Fs12355-012-0185-6	Melloni et al., 2013	0.01	0.3
1100	Silene latifolia	Silene latifolia Poir.	Wild	Angiosperm	Caryophyllaceae	Dicot	Tricellular	Dry	Starchless	Aonuma	2013	1	https://link.springer.com/article/10.1007%2Fs10265-012-0510-x	Aonuma et al., 2013	0.001	0.01	16.18			18.29						16.62				9.9
1101	Forsythia saxatilis	Forsythia saxatilis (Nakai) Nakai	Wild	Angiosperm	Oleaceae	Dicot	Bicellular	Dry	NA	Han	2013	0	http://apps.webofknowledge.com/full_record.do?product=UA&search_mode=GeneralSearch&qid=2&SID=E2WP5GksjlFoFNBDnjV&page=4&doc=37&cacheurlFromRightClick=no	Han et al., 2013		0.15
1102	Lycium chinense	Lycium chinense Mill.	Wild	Angiosperm	Solanaceae	Dicot	Bicellular	Wet	Starchy and starchless	Yoon	2013	1	http://www.koreascience.or.kr/article/JAKO201333651337325.page	Kim et al., 2013	0.01	0.1	1.62
1103	Picea omorika	Picea omorika (Pancic) Purk.	Wild	Gymnosperm	Pinaceae				NA	Batos	2013	1	http://www.idpan.poznan.pl/images/stories/dendrobiology/vol69/69_013_019.pdf	Batos & Nikolić, 2013	0	0.1
1104	Petunia hybrida	Petunia hybrida Vilm.	Cultivated	Angiosperm	Solanaceae	Dicot	Bicellular	Wet	Starchy and starchless	Li	2013	1	https://www.researchgate.net/profile/Li_Fosheng/publication/278850272_In_vitro_Culture_of_Petunia_hybrida_Microspores_and_Agrobacterium-mediated_Transient_Expression_of_b-glucuronidase_GUS_Reporter_Gene/links/55879bda08ae71f6ba915a10.pdf	Li, 2013		0.15	0.33								0.1
1105	Amsonia orientalis	Amsonia orientalis Decne.	Wild	Angiosperm	Apocynaceae	Dicot	Tricellular	Dry and wet	Starchless	Aksoy	2013	1	https://www.tandfonline.com/doi/pdf/10.1080/00087114.2013.854564?needAccess=true	Aksoy et al., 2013	0	0.1	1.62								0.91	0.82 (7H2O)						0.74
1106	Dendrobium lindleyi	Dendrobium lindleyi Steud.	Wild	Angiosperm	Orchidaceae	Monocot	Bicellular	Wet	Starchless	Deng Xi-Mei	2014	1	https://search.proquest.com/openview/52a6bbe9a1ba22114bb6556642fe2f95/1?cbl=2049649&pq-origsite=gscholar	Deng, 2014		0.1	1.62								0.73
1107	Cydonia oblonga	Cydonia oblonga Mill.	Cultivated	Angiosperm	Rosaceae	Dicot	Bicellular	Wet	Starchy and starchless	Zambon	2014	1	https://www.scielo.br/pdf/rbf/v36n2/v36n2a16.pdf	Zambon et al., 2014	0.01	0.068	5.92
1108	Celastrus orbiculatus	Celastrus orbiculatus Thunb.	Wild	Angiosperm	Celastraceae	Dicot	Bicellular	Dry	Starchless	Zhao Tong-Xin	2014	1	http://bbr.nefu.edu.cn/EN/abstract/abstract321.shtml	Zhao et al., 2014	0.006	0.05	4.86
1109	Cocos nucifera	Cocos nucifera L.	Cultivated	Angiosperm	Arecaceae	Monocot	Bicellular	Dry	NA	Machado	2014	1	https://www.scielo.br/scielo.php?script=sci_arttext&pid=S1807-86212014000200012	Machado et al., 2014		0.04	1.62			1.28 (4H2O)						0.82 (7H2O)				0.99
1110	Magnolia sinostellata P.L.Chiu & Z.H.Chen	Magnolia stellata (Siebold & Zucc.) Maxim.	Wild	Angiosperm	Magnoliaceae	Dicot	Bicellular	Dry	Starchless	Lu Lu	2014	1	http://bbr.nefu.edu.cn/EN/abstract/abstract302.shtml	Lu et al., 2014		0.03	3.24								1.81
1111	Eucommia ulmoides	Eucommia ulmoides Oliv.	Cultivated	Angiosperm	Eucommiaceae	Dicot	Bicellular	NA	NA	You Hanli	2014	0	https://www.cabdirect.org/cabdirect/abstract/20143180726	You et al., 2014	0	0.2	0.49			0.07
1112	Vitis amurensis	Vitis amurensis Rupr.	Cultivated	Angiosperm	Vitaceae	Dicot	Bicellular	Dry	Starchless	Li	2014	1	https://link.springer.com/content/pdf/10.1007%2Fs11627-013-9543-7.pdf	Li et al., 2014	0.007	0.15	1.62
1113	Vitis davidii	Vitis davidii (Rom.Caill.) Foëx	Cultivated	Angiosperm	Vitaceae	Dicot	Bicellular	Dry	Starchless	Li	2014	1	https://link.springer.com/content/pdf/10.1007%2Fs11627-013-9543-7.pdf	Li et al., 2014	0.007	0.15	1.62
1114	Vitis yanshanensis	Vitis yanshanensis J.X. Chen	Cultivated	Angiosperm	Vitaceae	Dicot	Bicellular	Dry	Starchless	Li	2014	1	https://link.springer.com/content/pdf/10.1007%2Fs11627-013-9543-7.pdf	Li et al., 2014	0.007	0.15	1.62
1115	Vitis vinifera	Vitis vinifera L.	Cultivated	Angiosperm	Vitaceae	Dicot	Bicellular	Dry	Starchless	Li	2014	1	https://link.springer.com/content/pdf/10.1007%2Fs11627-013-9543-7.pdf	Li et al., 2014	0.007	0.15	1.62
1116	Vitis vinifera × V. Amurensis Rupr	Vitis vinifera × V. Amurensis Rupr	Cultivated	Angiosperm	Vitaceae	Dicot	Bicellular	Dry	Starchless	Li	2014	1	https://link.springer.com/content/pdf/10.1007%2Fs11627-013-9543-7.pdf	Li et al., 2014	0.007	0.15	1.62
1117	Styrax tonkinensis	Styrax tonkinensis Craib ex Hartwich	Cultivated	Angiosperm	Styracaceae	Dicot	Bicellular	Dry	Starchless	Wu Jun	2014	0	https://www.cabdirect.org/cabdirect/abstract/20143317699	Wu et al., 2014		0.1	0.81
1118	Calanthe tsoongiana	Calanthe tsoongiana Tang & F.T.Wang	Wild	Angiosperm	Orchidaceae	Monocot	Bicellular	Wet	Starchless	Qian Xin	2014	0	http://xbzwxb.alljournal.net/ch/reader/view_abstract.aspx?file_no=20140219&flag=1	Qian, 2014		0.2	0.81			0.17 (4H2O)
1119	Cyrtanthus mackenii	Cyrtanthus mackenii Hook.f.	Wild	Angiosperm	Amaryllidaceae	Monocot	Bicellular	Dry	Starchless	Hoyo	2014	1	https://www.jstor.org/stable/pdf/24586834.pdf?refreqid=excelsior%3A9bf627e3b9c6f4beaa2c35fa659f751c	Hoyo et al., 2014	0.01	0.1	1.62								0.91							0.06
1120	Prunus laurocerasus	Prunus laurocerasus L.	Cultivated	Angiosperm	Rosaceae	Dicot	Bicellular	Wet	Starchy and starchless	Sulusoglu	2014	1	http://downloads.hindawi.com/journals/tswj/2014/657123.pdf	Sulusoglu & Cavusoglu, 2014	0.005	0.15	0.09
1121	Cucurbita pepo L. subsp. pepo	Cucurbita pepo L.	Cultivated	Angiosperm	Cucurbitaceae	Dicot	Bicellular	Dry	Starchy and starchless	Kosmrlj	2014	1	http://journals.tubitak.gov.tr/biology/issues/biy-14-38-4/biy-38-4-11-1402-58.pdf	Kosmrlj et al., 2014		0.125
1122	Scadoxus multiflorus subsp. multiflorus.	Scadoxus multiflorus (Martyn) Raf.	Wild	Angiosperm	Amaryllidaceae	Monocot	Bicellular	Dry	Starchless	Papenfus	2014	1	https://reader.elsevier.com/reader/sd/pii/S0254629913003815?token=7980E77BCCA15968CEEB99CC7A97471CFB4A4460574A68BEB55BD9EBB7CD60755AFAECD6C011028D6BA695CB68438961	Papenfus et al., 2014		0.1	1.62			1.83						1.67				0.99
1123	Cyrtanthus mackenii subsp. mackenii	Cyrtanthus mackenii Hook.f.	Wild	Angiosperm	Amaryllidaceae	Monocot	Bicellular	Dry	Starchless	Papenfus	2014	1	https://reader.elsevier.com/reader/sd/pii/S0254629913003815?token=7980E77BCCA15968CEEB99CC7A97471CFB4A4460574A68BEB55BD9EBB7CD60755AFAECD6C011028D6BA695CB68438961	Papenfus et al., 2014		0.1	1.62			1.83						1.67				0.99
1124	Clivia gardenii	Clivia gardenii Hook.	Wild	Angiosperm	Amaryllidaceae	Monocot	Bicellular	Dry	Starchless	Papenfus	2014	1	https://reader.elsevier.com/reader/sd/pii/S0254629913003815?token=7980E77BCCA15968CEEB99CC7A97471CFB4A4460574A68BEB55BD9EBB7CD60755AFAECD6C011028D6BA695CB68438961	Papenfus et al., 2014		0.1	1.62			1.83						1.67				0.99
1125	Scadoxus multiflorus subsp. multiflorus.	Scadoxus multiflorus (Martyn) Raf.	Wild	Angiosperm	Amaryllidaceae	Monocot	Bicellular	Dry	Starchless	Papenfus	2014	1	https://reader.elsevier.com/reader/sd/pii/S0254629913003815?token=7980E77BCCA15968CEEB99CC7A97471CFB4A4460574A68BEB55BD9EBB7CD60755AFAECD6C011028D6BA695CB68438961	Papenfus et al., 2014		0.1	1.62
1126	Cyrtanthus mackenii subsp. mackenii	Cyrtanthus mackenii Hook.f.	Wild	Angiosperm	Amaryllidaceae	Monocot	Bicellular	Dry	Starchless	Papenfus	2014	1	https://reader.elsevier.com/reader/sd/pii/S0254629913003815?token=7980E77BCCA15968CEEB99CC7A97471CFB4A4460574A68BEB55BD9EBB7CD60755AFAECD6C011028D6BA695CB68438961	Papenfus et al., 2014		0.1	1.62
1127	Clivia gardenii	Clivia gardenii Hook.	Wild	Angiosperm	Amaryllidaceae	Monocot	Bicellular	Dry	Starchless	Papenfus	2014	1	https://reader.elsevier.com/reader/sd/pii/S0254629913003815?token=7980E77BCCA15968CEEB99CC7A97471CFB4A4460574A68BEB55BD9EBB7CD60755AFAECD6C011028D6BA695CB68438961	Papenfus et al., 2014		0.1	1.62
1128	Citrus sinensi	Citrus sinensis (L.) Osbeck	Cultivated	Angiosperm	Rutaceae	Dicot	Bicellular	Wet	Starchy and starchless	Kundu	2014	1	http://journals.tubitak.gov.tr/biology/issues/biy-14-38-1/biy-38-1-1-1303-55.pdf	Kundu et al., 2014
1129	Citrus limon	Citrus limon (L.) Osbeck	Cultivated	Angiosperm	Rutaceae	Dicot	Bicellular	Wet	Starchy and starchless	Kundu	2014	1	http://journals.tubitak.gov.tr/biology/issues/biy-14-38-1/biy-38-1-1-1303-55.pdf	Kundu et al., 2014
1130	Citrus limetta Risso	Citrus medica L.	Cultivated	Angiosperm	Rutaceae	Dicot	Bicellular	Wet	Starchy and starchless	Kundu	2014	1	http://journals.tubitak.gov.tr/biology/issues/biy-14-38-1/biy-38-1-1-1303-55.pdf	Kundu et al., 2014
1131	Citrus sinensi	Citrus sinensis (L.) Osbeck	Cultivated	Angiosperm	Rutaceae	Dicot	Bicellular	Wet	Starchy and starchless	Kundu	2014	1	http://journals.tubitak.gov.tr/biology/issues/biy-14-38-1/biy-38-1-1-1303-55.pdf	Kundu et al., 2014
1132	Citrus limon	Citrus limon (L.) Osbeck	Cultivated	Angiosperm	Rutaceae	Dicot	Bicellular	Wet	Starchy and starchless	Kundu	2014	1	http://journals.tubitak.gov.tr/biology/issues/biy-14-38-1/biy-38-1-1-1303-55.pdf	Kundu et al., 2014
1133	Citrus limetta Risso	Citrus medica L.	Cultivated	Angiosperm	Rutaceae	Dicot	Bicellular	Wet	Starchy and starchless	Kundu	2014	1	http://journals.tubitak.gov.tr/biology/issues/biy-14-38-1/biy-38-1-1-1303-55.pdf	Kundu et al., 2014
1134	Elaeis guineensis (Pisifera)	Elaeis guineensis Jacq.	Cultivated	Angiosperm	Arecaceae	Monocot	Bicellular	Dry	NA	Kumar	2015	1	https://arccjournals.com/uploads/articles/6A4271.pdf	Kumar et al., 2015		0.025	1.62
1135	Shibataea chinensis	Shibataea chinensis Nakai	Wild	Angiosperm	Poaceae	Monocot	Tricellular	Dry	NA	Lin Shuyan	2015	0	http://apps.webofknowledge.com/full_record.do?product=UA&search_mode=GeneralSearch&qid=3&SID=C3bpXFRWZD7bhcJB1Ql&page=1&doc=4&cacheurlFromRightClick=no	Shuyan et al., 2015		0.15	0.17
1136	Bambusa multiplex	Bambusa multiplex (Lour.) Raeusch. ex Schult.	Cultivated	Angiosperm	Poaceae	Monocot	Tricellular	Dry	NA	Lin Shuyan	2015	0	http://apps.webofknowledge.com/full_record.do?product=UA&search_mode=GeneralSearch&qid=3&SID=C3bpXFRWZD7bhcJB1Ql&page=1&doc=4&cacheurlFromRightClick=no	Shuyan et al., 2015		0.15	0.17
1137	Arundinaria simonii f. heterophyllus	Pleioblastus simonii (Carrière) Nakai	Wild	Angiosperm	Poaceae	Monocot	Tricellular	Dry	NA	Lin Shuyan	2015	0	http://apps.webofknowledge.com/full_record.do?product=UA&search_mode=GeneralSearch&qid=3&SID=C3bpXFRWZD7bhcJB1Ql&page=1&doc=4&cacheurlFromRightClick=no	Shuyan et al., 2015		0.2	0.17
1138	Triticum aestivum	Triticum aestivum L.	Cultivated	Angiosperm	Poaceae	Monocot	Tricellular	Dry	NA	Jayaprakash	2015	1	https://pdfs.semanticscholar.org/f6e9/d831156c06e10dc875f568c107632724807f.pdf	Jayaprakash et al., 2015		30% maltose	0.81			0.61
1139	Triticum aestivum	Triticum aestivum L.	Cultivated	Angiosperm	Poaceae	Monocot	Tricellular	Dry	NA	Jayaprakash	2015	1	https://pdfs.semanticscholar.org/f6e9/d831156c06e10dc875f568c107632724807f.pdf	Jayaprakash et al., 2015		27.5 % Maltose	0.98			0.61
1140	Elaeis guineensis	Elaeis guineensis Jacq.	Cultivated	Angiosperm	Arecaceae	Monocot	Bicellular	Dry	NA	Youmbi	2015	1	https://d1wqtxts1xzle7.cloudfront.net/43376326/joprv27sept-emmanuel1.pdf?1457153114=&response-content-disposition=inline%3B+filename%3DOil_pAlm_Elaeis_guineensis_Jacq._imprOve.pdf&Expires=1591093085&Signature=Y5H55kHB-223CQ0sXPhJ9zmBfRGXlznYzLmU2vkLjwxDTYZ1y1p4~3jfxq~7o-frmUxfavAtlqlnrmjrt4EBqwRG2ajYn-ZaSAw52yYL45gPXMnqXUPhhTnQ8xTV4Z1tX5jBLArrXLPhF970yg7k9mpYHiipSUqKAxFxmCt3kUPwUA4BwXOAvrl4qFDitH…	Youmbi et al., 2015		0.15
1141	Aechmea kertesziae	Aechmea kertesziae Reitz	Wild	Angiosperm	Bromeliaceae	Monocot	Bicellular	Wet	Starchless	Kumari	2015	1	https://onlinelibrary.wiley.com/doi/full/10.1111/plb.12300	Kumari et al., 2015		0.1	1.62			1.83						1.67				0.99
1142	Aloe maculata	Aloe maculata All.	Wild	Angiosperm	Asphodelaceae	Monocot	Bicellular	Wet	NA	Kumari	2015	1	https://onlinelibrary.wiley.com/doi/full/10.1111/plb.12300	Kumari et al., 2015		0.1	1.62
1143	Kniphofia uvaria	Kniphofia uvaria (L.) Oken	Wild	Angiosperm	Asphodelaceae	Monocot	Bicellular	Dry	NA	Kumari	2015	1	https://onlinelibrary.wiley.com/doi/full/10.1111/plb.12300	Kumari et al., 2015		0.1	1.62
1144	Lachenalia aloides	Lachenalia aloides (L.f.) Engl.	Wild	Angiosperm	Asparagaceae	Monocot	Bicellular	Dry	NA	Kumari	2015	1	https://onlinelibrary.wiley.com/doi/full/10.1111/plb.12300	Kumari et al., 2015		0.1	1.62			1.83						1.67				0.99
1145	Nematanthus crassifolius	Nematanthus crassifolius (Schott) Wiehler	Wild	Angiosperm	Gesneriaceae	Dicot	Bicellular	Dry	Starchless	Kumari	2015	1	https://onlinelibrary.wiley.com/doi/full/10.1111/plb.12300	Kumari et al., 2015	0
1146	Paeonia lactiflora	Paeonia lactiflora Pall.	Wild	Angiosperm	Paeoniaceae	Dicot	Bicellular	Wet	Starchless	Kumari	2015	1	https://onlinelibrary.wiley.com/doi/full/10.1111/plb.12300	Kumari et al., 2015		0.1	1.62			1.83						1.67				0.99
1147	Tulbaghia simmleri	Tulbaghia simmleri Beauverd	Wild	Angiosperm	Amaryllidaceae	Monocot	Bicellular	Dry	Starchless	Kumari	2015	1	https://onlinelibrary.wiley.com/doi/full/10.1111/plb.12300	Kumari et al., 2015	0
1148	Dimocarpus longan	Dimocarpus longan Lour.	Cultivated	Angiosperm	Sapindaceae	Dicot	Bicellular	Wet	NA	Pham	2015	1	https://www.sciencedirect.com/science/article/abs/pii/S0304423815302363?via%3Dihub	Pham et al., 2015		0.1	1.62			2.97 (4H2O)						0.82 (7H2O)				0.99
1149	Aechmea bicolor	Aechmea bicolor L.B.Sm.	Wild	Angiosperm	Bromeliaceae	Monocot	Bicellular	Wet	Starchless	De Souza	2015	1	https://link.springer.com/article/10.1007/s10681-014-1273-3	Souza et al., 2015	0.008	0.15	1.62			1.27 (4H2O)						0.81 (7H2O)				0.99
1150	Aechmea bicolor	Aechmea bicolor L.B.Sm.	Wild	Angiosperm	Bromeliaceae	Monocot	Bicellular	Wet	Starchless	De Souza	2015	1	https://link.springer.com/article/10.1007/s10681-014-1273-3	Souza et al., 2015	0.008	0.12	1.62			1.27 (4H2O)						0.81 (7H2O)				0.99
1151	Solanum lycopersicum	Solanum lycopersicum L.	Cultivated	Angiosperm	Solanaceae	Dicot	Bicellular	Wet	Starchy and starchless	Lu	2015	1	https://www.frontiersin.org/articles/10.3389/fpls.2015.00391/full	Lu et al., 2015		0.025	1.6			3						0.8							1																20 MES
1152	Camellia japonica	Camellia japonica L.	Cultivated	Angiosperm	Theaceae	Dicot	Bicellular	Wet	Starchless	Jia Wen-Qing	2015	1	https://search.proquest.com/openview/355d4fda08b21e842ba4a0a4b28c3799/1?cbl=2049649&pq-origsite=gscholar	Jia, 2015		0.15	0.81			5484.87
1153	Passiflora sublanceolata	Passiflora sublanceolata (Killip) J.M. MacDougal	Cultivated	Angiosperm	Passifloraceae	Dicot	Bicellular	Dry	NA	Belo	2015	1	https://link.springer.com/content/pdf/10.1515/biolog-2015-0089.pdf	Belo et al., 2015		0.05	1.62			4.86 (4H2O)						0.82 (7H2O)				0.99
1154	Arundo plinii	Arundo plinii Turra	Cultivated	Angiosperm	Poaceae	Monocot	Tricellular	Dry	NA	Hardion	2015	1	https://www.sciencedirect.com/science/article/pii/S1631069115000918?via%3Dihub	Hardion et al., 2015	0.01	0.15	1.62			1.22						1.67
1155	Arundo donaciformis	Arundo donaciformis (Loisel.) Hardion, Laurent, Verlaque & Vila, Bruno	Cultivated	Angiosperm	Poaceae	Monocot	Tricellular	Dry	NA	Hardion	2015	1	https://www.sciencedirect.com/science/article/pii/S1631069115000918?via%3Dihub	Hardion et al., 2015	0.01	0.15	1.62			1.22						1.67
1156	Cocos nucifera	Cocos nucifera L.	Cultivated	Angiosperm	Arecaceae	Monocot	Bicellular	Dry	NA	Moura	2015	1	https://www.scielo.br/scielo.php?pid=S1806-66902015000200421&script=sci_arttext	Moura et al., 2015		0.04	1.62			1.28 (4H2O)						0.82 (7H2O)				0.99
1157	Fritillaria stribrnyi	Fritillaria stribrnyi Velen.	Wild	Angiosperm	Liliaceae	Monocot	Bicellular	Wet	Starchless	Kartal	2015	1	https://www.tandfonline.com/doi/full/10.1080/00087114.2014.998947	Kartal, 2015	0	0.1	1.62			1.28 (4H2O)						1.04 (4H2O)				0.99
1158	Phalaenopsis little gem stripes	Phalaenopsis sp.	Wild	Angiosperm	Orchidaceae	Monocot	Bicellular	Wet	Starchless	Yuan	2015	1	https://www.researchgate.net/publication/282220784_Current_trends_of_Phalaenopsis_orchid_breeding_and_study_on_pollen_storage	Yuan et al., 2015		0.05
1159	Salix lapponum	Salix lapponum L.	Wild	Angiosperm	Salicaceae	Dicot	Bicellular	Dry	Starchless	Pogorzelec	2015	1	http://www.hortorumcultus.actapol.net/pub/14_6_151.pdf	Pogorzelec et al., 2015	0.01	2.5% glucose	0.17
1160	Salix myrtilloides	Salix myrtilloides L.	Wild	Angiosperm	Salicaceae	Dicot	Bicellular	Dry	Starchless	Pogorzelec	2015	1	https://bioone.org/journals/polish-journal-of-ecology/volume-63/issue-3/15052249PJE2015.63.3.006/Assessment-of-Chosen-Reproductive-Cycle-Processes-and-Genetic-Diversity-of/10.3161/15052249PJE2015.63.3.006.full	Pogorzelec et al., 2015	0.01	2.5% glucose	0.17
1161	Eriobotrya japonica	Eriobotrya japonica (Thunb.) Lindl.	Cultivated	Angiosperm	Rosaceae	Dicot	Bicellular	Wet	Starchy and starchless	Nogueira	2015	1	https://www.scielo.br/pdf/brag/v74n1/0006-8705-brag-74-1-9.pdf	Nogueira et al., 2015	0.01	0.2	19.41
1162	Elaeis guineensis	Elaeis guineensis Jacq.	Cultivated	Angiosperm	Arecaceae	Monocot	Bicellular	Dry	NA	Sousa	2016	1	https://academic.oup.com/botlinnean/article/182/2/536/2708961	Sousa et al., 2016	0.003	0.2	1.62			1.28 (4H2O)
1163	Leonurus cardiaca	Leonurus cardiaca L.	Wild	Angiosperm	Lamiaceae	Dicot	Bicellular	Dry	NA	Shekari	2016	1	https://rtis2.ut.ac.ir/media/?activity_id=94261770&f_name=paper_upload&path=uploads/articles/papers/leonurus-shekari2016.pdf	Shekari et al., 2016	0.01	0.15	1.62
1164	Spathodea campanulata	Spathodea campanulata P.Beauv.	Wild	Angiosperm	Bignoniaceae	Dicot	Bicellular	Wet	Starchy and starchless	Kumar	2016	1	https://pdfs.semanticscholar.org/2d45/267f04c4445906f1d44f1d18c57efa85b464.pdf	Kumar et al., 2016		0.05
1165	Bauhinia purpurea	Bauhinia purpurea L.	Cultivated	Angiosperm	Fabaceae	Dicot	Bicellular	Wet	NA	Kumar	2016	1	https://pdfs.semanticscholar.org/2d45/267f04c4445906f1d44f1d18c57efa85b464.pdf	Kumar et al., 2016		0.05
1166	Bauhinia variegata	Bauhinia variegata L.	Cultivated	Angiosperm	Fabaceae	Dicot	Bicellular	Wet	NA	Kumar	2016	1	https://pdfs.semanticscholar.org/2d45/267f04c4445906f1d44f1d18c57efa85b464.pdf	Kumar et al., 2016		0.05
1167	Pyrus bretschneideri	Pyrus bretschneideri Rehder	Cultivated	Angiosperm	Rosaceae	Dicot	Bicellular	Wet	Starchy and starchless	Yang	2016	1	https://link.springer.com/article/10.1007/s11105-015-0959-6	Yang et al., 2016	0	0.151	1.6			0.55						1.6				1																			5 MES
1168	Artabotrys hexapetalus	Artabotrys hexapetalus (L.f.) Bhandari	Cultivated	Angiosperm	Annonaceae	Dicot	Bicellular	Wet	NA	Bodhipadma	2016	1	http://www.scienceasia.org/2016.42.n3/scias42_178.pdf	Bodhipadma et al., 2016	0	0.2	0.1								1 (2H2O)
1169	Artabotrys hexapetalus	Artabotrys hexapetalus (L.f.) Bhandari	Cultivated	Angiosperm	Annonaceae	Dicot	Bicellular	Wet	NA	Bodhipadma	2016	1	http://www.scienceasia.org/2016.42.n3/scias42_178.pdf	Bodhipadma et al., 2016	0.008	0.2	0.1								1 (2H2O)
1170	Musa tetraploid hybrids	Musa	Cultivated	Angiosperm	Musaceae	Monocot	Bicellular	Wet	Starchless	Soares	2016	1	https://www.scielo.br/pdf/brag/v75n2/0006-8705-brag-1678-4499328.pdf	Soares et al., 2016	0.008	0.15	1.62			1.28 (4H2O)						0.82 (7H2O)				0.99
1171	Pyrus communis	Pyrus communis L.	Cultivated	Angiosperm	Rosaceae	Dicot	Bicellular	Wet	Starchy and starchless	Nogueira	2016	1	https://www.scielo.br/scielo.php?script=sci_arttext&pid=S1806-66902016000200380	Nogueira et al., 2016	0.01	0.09	11.33			0.89
1172	Pyrus pyrifolia	Pyrus pyrifolia (Burm.f.) Nakai	Cultivated	Angiosperm	Rosaceae	Dicot	Bicellular	Wet	Starchy and starchless	Nogueira	2016	1	https://www.scielo.br/scielo.php?script=sci_arttext&pid=S1806-66902016000200380	Nogueira et al., 2016	0.01	0.09	11.33			0.89
1173	Annona squamosa	Annona squamosa L.	Cultivated	Angiosperm	Annonaceae	Dicot	Bicellular	Wet	NA	Rodrigues	2016	1	https://www.scielo.br/pdf/cagro/v40n2/1981-1829-cagro-40-02-00145.pdf	Rodrigues et al., 2016		0.1	1.62			1.27 (4H2O)						0.87 (7H2O)				0.99
1174	Vitis rotundifolia	Vitis rotundifolia Michx.	Cultivated	Angiosperm	Vitaceae	Dicot	Bicellular	Dry	Starchless	Biasi	2016	1	https://journals.ashs.org/hortsci/view/journals/hortsci/51/3/article-p255.xml	Biasi & Conner, 2016	0.01	0.188	0.81			0.89																													10 MES
1175	Salix myrtilloides	Salix myrtilloides L.	Wild	Angiosperm	Salicaceae	Dicot	Bicellular	Dry	Starchless	Pogorzelec	2016	1	https://pdfs.semanticscholar.org/dd35/ab68344b494b5d045ba7ba7dd087e64d0927.pdf?_ga=2.52510760.1229914949.1590993505-218708052.1585738021	Pogorzelec et al., 2016	0.01	2.5% glucose	0.17
1176	Prunus dulcis	Prunus dulcis (Mill.) D.A.Webb	Cultivated	Angiosperm	Rosaceae	Dicot	Bicellular	Wet	Starchy and starchless	Radovic	2016	1	https://www.researchgate.net/profile/Dragan_Milatovic/publication/307920461_The_effect_of_plant_hormones_on_pollen_germination_and_pollen_tube_growth_of_almond_cultivars/links/58ac7dd6aca272af06662445/The-effect-of-plant-hormones-on-pollen-germination-and-pollen-tube-growth-of-almond-cultivars.pdf	Radović et al., 2016	0.007	0.15
1177	Acca sellowiana	Acca sellowiana (O.Berg) Burret	Cultivated	Angiosperm	Myrtaceae	Dicot	Bicellular	Dry	Starchless	Xiong	2016	1	https://www.tandfonline.com/doi/full/10.1080/01140671.2016.1174945	Xiong et al., 2016	0.01	0.1	1.95								0.01
1178	Arabis alpina	Arabis alpina L.	Wild	Angiosperm	Brassicaceae	Dicot	Tricellular	Dry	NA	Pavlova	2016	1	https://www.researchgate.net/publication/303941483_Effect_of_nickel_on_pollen_germination_and_pollen_tube_length_in_Arabis_alpina_Brassicaceae	Pavlova, 2016		0.15	1.62
1179	Leonurus cardiaca	Leonurus cardiaca L.	Wild	Angiosperm	Lamiaceae	Dicot	Bicellular	Dry	NA	Borna	2016	0	https://www.publish.csiro.au/bt/BT15186	Borna et al., 2016		0.15
1180	Brassica napus	Brassica napus L.	Cultivated	Angiosperm	Brassicaceae	Dicot	Tricellular	Dry	NA	Morrison	2016	1	https://bioone.org/journals/Crop-and-Pasture-Science/volume-67/issue-3%e2%80%934/CP15230/Characterising-canola-pollen-germination-across-a-temperature-gradient/10.1071/CP15230.full	Morrison et al., 2016	0	0.1	1.62								5	1							5
1181	Olea europaea	Olea europaea L.	Cultivated	Angiosperm	Oleaceae	Dicot	Bicellular	Dry	NA	Silva	2016	1	https://www.scielo.br/pdf/brag/v75n1/0006-8705-brag-1678-4499213.pdf	Silva et al., 2016	0.004	0.09	6.47
1182	Ricinus communis L.	Ricinus communis L.	Cultivated	Angiosperm	Euphorbiaceae	Dicot	Bicellular	Dry	Starchy	Diamantino	2016	1	https://www.scielo.br/scielo.php?pid=S1807-86212016000100077&script=sci_arttext	Diamantino et al., 2016	0.008	0.15	1.62			1.83						1.78				0.99
1183	Ricinus communis L.	Ricinus communis L.	Cultivated	Angiosperm	Euphorbiaceae	Dicot	Bicellular	Dry	Starchy	Diamantino	2016	1	https://www.scielo.br/scielo.php?pid=S1807-86212016000100077&script=sci_arttext	Diamantino et al., 2016	0.008	0.2	1.62			1.83						1.78				0.99
1184	Zea mays	Zea mays L.	Cultivated	Angiosperm	Poaceae	Monocot	Tricellular	Dry	NA	Huang	2017	1	https://www.genetics.org/content/genetics/207/4/1361.full.pdf	Huang et al., 2017		0.2	0.17								20							0.1
1185	Areca catechu	Areca catechu L.	Cultivated	Angiosperm	Arecaceae	Monocot	Bicellular	Dry	NA	Karun	2017	1	http://14.139.158.120:8000/xmlui/bitstream/handle/123456789/7182/Cryopreservation%20of%20arecanut.pdf?sequence=1	Karun et al., 2017	0.01	0.025	1.62
1186	Aechmea bicolor	Aechmea bicolor L.B.Sm.	Wild	Angiosperm	Bromeliaceae	Monocot	Bicellular	Wet	Starchless	Souza	2017	1	https://www.scielo.br/pdf/aabc/v89n4/0001-3765-aabc-201720170450.pdf	Souza et al., 2017	0.005	0.1	1.62			1.28 (4H2O)						0.82 (7H2O)				0.99
1187	Aechmea bromeliifolia	Aechmea bromeliifolia (Rudge) Baker	Wild	Angiosperm	Bromeliaceae	Monocot	Bicellular	Wet	Starchless	Souza	2017	1	https://www.scielo.br/pdf/aabc/v89n4/0001-3765-aabc-201720170450.pdf	Souza et al., 2017	0.005	0.1	1.62			1.28 (4H2O)						0.82 (7H2O)				0.99
1188	Aechmea distichantha	Aechmea distichantha Lem.	Wild	Angiosperm	Bromeliaceae	Monocot	Bicellular	Wet	Starchless	Souza	2017	1	https://www.scielo.br/pdf/aabc/v89n4/0001-3765-aabc-201720170450.pdf	Souza et al., 2017	0.005	0.1	1.62			1.28 (4H2O)						0.82 (7H2O)				0.99
1189	Aechmea fasciata	Aechmea fasciata (Lindl.) Baker	Wild	Angiosperm	Bromeliaceae	Monocot	Bicellular	Wet	Starchless	Souza	2017	1	https://www.scielo.br/pdf/aabc/v89n4/0001-3765-aabc-201720170450.pdf	Souza et al., 2017	0.005	0.1	1.62			1.28 (4H2O)						0.82 (7H2O)				0.99
1190	Aechmea nudicaulis	Aechmea nudicaulis (L.) Griseb.	Wild	Angiosperm	Bromeliaceae	Monocot	Bicellular	Wet	Starchless	Souza	2017	1	https://www.scielo.br/pdf/aabc/v89n4/0001-3765-aabc-201720170450.pdf	Souza et al., 2017	0.005	0.1	1.62			1.28 (4H2O)						0.82 (7H2O)				0.99
1191	Ananas sp.	Ananas sp.	Cultivated	Angiosperm	Bromeliaceae	Monocot	Bicellular	Wet	Starchless	Souza	2017	1	https://www.scielo.br/pdf/aabc/v89n4/0001-3765-aabc-201720170450.pdf	Souza et al., 2017	0.005	0.1	1.62			1.28 (4H2O)						0.82 (7H2O)				0.99
1192	Ananas ananassoides	Ananas ananassoides (Baker) L.B.Sm.	Cultivated	Angiosperm	Bromeliaceae	Monocot	Bicellular	Wet	Starchless	Souza	2017	1	https://www.scielo.br/pdf/aabc/v89n4/0001-3765-aabc-201720170450.pdf	Souza et al., 2017	0.005	0.1	1.62			1.28 (4H2O)						0.82 (7H2O)				0.99
1193	Ananas bracteatus	Ananas bracteatus (Lindl.) Schult. & Schult.f.	Cultivated	Angiosperm	Bromeliaceae	Monocot	Bicellular	Wet	Starchless	Souza	2017	1	https://www.scielo.br/pdf/aabc/v89n4/0001-3765-aabc-201720170450.pdf	Souza et al., 2017	0.005	0.1	1.62			1.28 (4H2O)						0.82 (7H2O)				0.99
1194	Ananas lucidus	Ananas lucidus Mill.	Cultivated	Angiosperm	Bromeliaceae	Monocot	Bicellular	Wet	Starchless	Souza	2017	1	https://www.scielo.br/pdf/aabc/v89n4/0001-3765-aabc-201720170450.pdf	Souza et al., 2017	0.005	0.1	1.62			1.28 (4H2O)						0.82 (7H2O)				0.99
1195	Ananas parguazensis	Ananas parguazensis Camargo & L.B.Sm.	Cultivated	Angiosperm	Bromeliaceae	Monocot	Bicellular	Wet	Starchless	Souza	2017	1	https://www.scielo.br/pdf/aabc/v89n4/0001-3765-aabc-201720170450.pdf	Souza et al., 2017	0.005	0.1	1.62			1.28 (4H2O)						0.82 (7H2O)				0.99
1196	Alcantarea nahoumii (Leme) J.R.Grant	Vriesea nahoumii Leme	Wild	Angiosperm	Bromeliaceae	Monocot	Bicellular	Wet	Starchless	Souza	2017	1	https://www.scielo.br/pdf/aabc/v89n4/0001-3765-aabc-201720170450.pdf	Souza et al., 2017	0.005	0.1	1.62			1.28 (4H2O)						0.82 (7H2O)				0.99
1197	Pseudananas sagenarius (Arruda) Camargo	Ananas sagenaria (Arruda) Schult. & Schult.f.	Cultivated	Angiosperm	Bromeliaceae	Monocot	Bicellular	Wet	Starchless	Souza	2017	1	https://www.scielo.br/pdf/aabc/v89n4/0001-3765-aabc-201720170450.pdf	Souza et al., 2017	0.005	0.1	1.62			1.28 (4H2O)						0.82 (7H2O)				0.99
1198	Vriesea carinata	Vriesea carinata Wawra	Wild	Angiosperm	Bromeliaceae	Monocot	Bicellular	Wet	Starchless	Souza	2017	1	https://www.scielo.br/pdf/aabc/v89n4/0001-3765-aabc-201720170450.pdf	Souza et al., 2017	0.005	0.1	1.62			1.28 (4H2O)						0.82 (7H2O)				0.99
1199	Vriesea friburgensis	Vriesea friburgensis Mez	Wild	Angiosperm	Bromeliaceae	Monocot	Bicellular	Wet	Starchless	Souza	2017	1	https://www.scielo.br/pdf/aabc/v89n4/0001-3765-aabc-201720170450.pdf	Souza et al., 2017	0.005	0.1	1.62			1.28 (4H2O)						0.82 (7H2O)				0.99
1200	Vriesea michaelii	Vriesea michaelii W.Weber	Wild	Angiosperm	Bromeliaceae	Monocot	Bicellular	Wet	Starchless	Souza	2017	1	https://www.scielo.br/pdf/aabc/v89n4/0001-3765-aabc-201720170450.pdf	Souza et al., 2017	0.005	0.1	1.62			1.28 (4H2O)						0.82 (7H2O)				0.99
1201	Vriesea paraibica	Vriesea paraibica Wawra	Wild	Angiosperm	Bromeliaceae	Monocot	Bicellular	Wet	Starchless	Souza	2017	1	https://www.scielo.br/pdf/aabc/v89n4/0001-3765-aabc-201720170450.pdf	Souza et al., 2017	0.005	0.1	1.62			1.28 (4H2O)						0.82 (7H2O)				0.99
1202	Vriesea simplex	Vriesea simplex (Vell.) Beer	Wild	Angiosperm	Bromeliaceae	Monocot	Bicellular	Wet	Starchless	Souza	2017	1	https://www.scielo.br/pdf/aabc/v89n4/0001-3765-aabc-201720170450.pdf	Souza et al., 2017	0.005	0.1	1.62			1.28 (4H2O)						0.82 (7H2O)				0.99
1203	Vriesea unilateralis	Vriesea unilateralis (Baker) Mez	Wild	Angiosperm	Bromeliaceae	Monocot	Bicellular	Wet	Starchless	Souza	2017	1	https://www.scielo.br/pdf/aabc/v89n4/0001-3765-aabc-201720170450.pdf	Souza et al., 2017	0.005	0.1	1.62			1.28 (4H2O)						0.82 (7H2O)				0.99
1204	Aechmea bicolor	Aechmea bicolor L.B.Sm.	Wild	Angiosperm	Bromeliaceae	Monocot	Bicellular	Wet	Starchless	Souza	2017	1	https://www.scielo.br/pdf/aabc/v89n4/0001-3765-aabc-201720170450.pdf	Souza et al., 2017	0.008	0.15	1.62			1.28 (4H2O)						0.82 (7H2O)				0.99
1205	Aechmea bromeliifolia	Aechmea bromeliifolia (Rudge) Baker	Wild	Angiosperm	Bromeliaceae	Monocot	Bicellular	Wet	Starchless	Souza	2017	1	https://www.scielo.br/pdf/aabc/v89n4/0001-3765-aabc-201720170450.pdf	Souza et al., 2017	0.008	0.15	1.62			1.28 (4H2O)						0.82 (7H2O)				0.99
1206	Aechmea distichantha	Aechmea distichantha Lem.	Wild	Angiosperm	Bromeliaceae	Monocot	Bicellular	Wet	Starchless	Souza	2017	1	https://www.scielo.br/pdf/aabc/v89n4/0001-3765-aabc-201720170450.pdf	Souza et al., 2017	0.008	0.15	1.62			1.28 (4H2O)						0.82 (7H2O)				0.99
1207	Aechmea fasciata	Aechmea fasciata (Lindl.) Baker	Wild	Angiosperm	Bromeliaceae	Monocot	Bicellular	Wet	Starchless	Souza	2017	1	https://www.scielo.br/pdf/aabc/v89n4/0001-3765-aabc-201720170450.pdf	Souza et al., 2017	0.008	0.15	1.62			1.28 (4H2O)						0.82 (7H2O)				0.99
1208	Aechmea nudicaulis	Aechmea nudicaulis (L.) Griseb.	Wild	Angiosperm	Bromeliaceae	Monocot	Bicellular	Wet	Starchless	Souza	2017	1	https://www.scielo.br/pdf/aabc/v89n4/0001-3765-aabc-201720170450.pdf	Souza et al., 2017	0.008	0.15	1.62			1.28 (4H2O)						0.82 (7H2O)				0.99
1209	Ananas sp.	Ananas sp.	Cultivated	Angiosperm	Bromeliaceae	Monocot	Bicellular	Wet	Starchless	Souza	2017	1	https://www.scielo.br/pdf/aabc/v89n4/0001-3765-aabc-201720170450.pdf	Souza et al., 2017	0.008	0.15	1.62			1.28 (4H2O)						0.82 (7H2O)				0.99
1210	Ananas ananassoides	Ananas ananassoides (Baker) L.B.Sm.	Cultivated	Angiosperm	Bromeliaceae	Monocot	Bicellular	Wet	Starchless	Souza	2017	1	https://www.scielo.br/pdf/aabc/v89n4/0001-3765-aabc-201720170450.pdf	Souza et al., 2017	0.008	0.15	1.62			1.28 (4H2O)						0.82 (7H2O)				0.99
1211	Ananas bracteatus	Ananas bracteatus (Lindl.) Schult. & Schult.f.	Cultivated	Angiosperm	Bromeliaceae	Monocot	Bicellular	Wet	Starchless	Souza	2017	1	https://www.scielo.br/pdf/aabc/v89n4/0001-3765-aabc-201720170450.pdf	Souza et al., 2017	0.008	0.15	1.62			1.28 (4H2O)						0.82 (7H2O)				0.99
1212	Ananas lucidus	Ananas lucidus Mill.	Cultivated	Angiosperm	Bromeliaceae	Monocot	Bicellular	Wet	Starchless	Souza	2017	1	https://www.scielo.br/pdf/aabc/v89n4/0001-3765-aabc-201720170450.pdf	Souza et al., 2017	0.008	0.15	1.62			1.28 (4H2O)						0.82 (7H2O)				0.99
1213	Ananas parguazensis	Ananas parguazensis Camargo & L.B.Sm.	Cultivated	Angiosperm	Bromeliaceae	Monocot	Bicellular	Wet	Starchless	Souza	2017	1	https://www.scielo.br/pdf/aabc/v89n4/0001-3765-aabc-201720170450.pdf	Souza et al., 2017	0.008	0.15	1.62			1.28 (4H2O)						0.82 (7H2O)				0.99
1214	Alcantarea nahoumii (Leme) J.R.Grant	Vriesea nahoumii Leme	Wild	Angiosperm	Bromeliaceae	Monocot	Bicellular	Wet	Starchless	Souza	2017	1	https://www.scielo.br/pdf/aabc/v89n4/0001-3765-aabc-201720170450.pdf	Souza et al., 2017	0.008	0.15	1.62			1.28 (4H2O)						0.82 (7H2O)				0.99
1215	Pseudananas sagenarius (Arruda) Camargo	Ananas sagenaria (Arruda) Schult. & Schult.f.	Cultivated	Angiosperm	Bromeliaceae	Monocot	Bicellular	Wet	Starchless	Souza	2017	1	https://www.scielo.br/pdf/aabc/v89n4/0001-3765-aabc-201720170450.pdf	Souza et al., 2017	0.008	0.15	1.62			1.28 (4H2O)						0.82 (7H2O)				0.99
1216	Vriesea carinata	Vriesea carinata Wawra	Wild	Angiosperm	Bromeliaceae	Monocot	Bicellular	Wet	Starchless	Souza	2017	1	https://www.scielo.br/pdf/aabc/v89n4/0001-3765-aabc-201720170450.pdf	Souza et al., 2017	0.008	0.15	1.62			1.28 (4H2O)						0.82 (7H2O)				0.99
1217	Vriesea friburgensis	Vriesea friburgensis Mez	Wild	Angiosperm	Bromeliaceae	Monocot	Bicellular	Wet	Starchless	Souza	2017	1	https://www.scielo.br/pdf/aabc/v89n4/0001-3765-aabc-201720170450.pdf	Souza et al., 2017	0.008	0.15	1.62			1.28 (4H2O)						0.82 (7H2O)				0.99
1218	Vriesea michaelii	Vriesea michaelii W.Weber	Wild	Angiosperm	Bromeliaceae	Monocot	Bicellular	Wet	Starchless	Souza	2017	1	https://www.scielo.br/pdf/aabc/v89n4/0001-3765-aabc-201720170450.pdf	Souza et al., 2017	0.008	0.15	1.62			1.28 (4H2O)						0.82 (7H2O)				0.99
1219	Vriesea paraibica	Vriesea paraibica Wawra	Wild	Angiosperm	Bromeliaceae	Monocot	Bicellular	Wet	Starchless	Souza	2017	1	https://www.scielo.br/pdf/aabc/v89n4/0001-3765-aabc-201720170450.pdf	Souza et al., 2017	0.008	0.15	1.62			1.28 (4H2O)						0.82 (7H2O)				0.99
1220	Vriesea simplex	Vriesea simplex (Vell.) Beer	Wild	Angiosperm	Bromeliaceae	Monocot	Bicellular	Wet	Starchless	Souza	2017	1	https://www.scielo.br/pdf/aabc/v89n4/0001-3765-aabc-201720170450.pdf	Souza et al., 2017	0.008	0.15	1.62			1.28 (4H2O)						0.82 (7H2O)				0.99
1221	Vriesea unilateralis	Vriesea unilateralis (Baker) Mez	Wild	Angiosperm	Bromeliaceae	Monocot	Bicellular	Wet	Starchless	Souza	2017	1	https://www.scielo.br/pdf/aabc/v89n4/0001-3765-aabc-201720170450.pdf	Souza et al., 2017	0.008	0.15	1.62			1.28 (4H2O)						0.82 (7H2O)				0.99
1222	Citrus cavaleriei	Citrus cavaleriei H.Lév. ex Cavalerie	Cultivated	Angiosperm	Rutaceae	Dicot	Bicellular	Wet	Starchy and starchless	Zhang	2017	1	https://link.springer.com/article/10.1007%2Fs11627-017-9848-z	Zhang et al., 2017	0.01	0.15	1.62			6.1						2.5				0.99
1223	Citrus maxima	Citrus maxima (Burm.) Merr.	Cultivated	Angiosperm	Rutaceae	Dicot	Bicellular	Wet	Starchy and starchless	Zhang	2017	1	https://link.springer.com/article/10.1007%2Fs11627-017-9848-z	Zhang et al., 2017	0.01	0.15	1.62			6.1						2.5				0.99
1224	Plumeria rubra	Plumeria rubra L.	Cultivated	Angiosperm	Apocynaceae	Dicot	Tricellular	Dry and wet	Starchless	Perez	2017	1	https://journals.ashs.org/horttech/view/journals/horttech/27/4/article-p461.xml	Perez, 2017		0.15
1225	Ananas comosus	Ananas comosus (L.) Merr.	Cultivated	Angiosperm	Bromeliaceae	Monocot	Bicellular	Wet	Starchless	Da Silva	2017	1	https://ainfo.cnptia.embrapa.br/digital/bitstream/item/168047/1/2017-Cryopreservation-polen-Pineapple.pdf	Silva et al., 2017		0.15
1226	Pinus nigra	Pinus nigra J.F.Arnold	Wild	Gymnosperm	Pinaceae				NA	Joester	2017	1	https://onlinelibrary.wiley.com/doi/full/10.1002/jbio.201600011	Joester et al., 2017	0	0.01	0.17			0.19						0.18				0.1
1227	Picea omorika	Picea omorika (Pancic) Purk.	Wild	Gymnosperm	Pinaceae				NA	Joester	2017	1	https://onlinelibrary.wiley.com/doi/full/10.1002/jbio.201600011	Joester et al., 2017	0	0.01	0.17			0.19						0.18				0.1
1228	Camellia japonica	Camellia japonica L.	Cultivated	Angiosperm	Theaceae	Dicot	Bicellular	Wet	Starchless	Joester	2017	1	https://onlinelibrary.wiley.com/doi/full/10.1002/jbio.201600011	Joester et al., 2017	0	0.01	0.17			0.19						0.18				0.1
1229	Physalis angulata	Physalis angulata L.	Wild	Angiosperm	Solanaceae	Dicot	Bicellular	Wet	Starchy and starchless	Da Silva	2017	1	https://www.scielo.br/scielo.php?pid=S1806-66902017000200365&script=sci_arttext	Silva et al., 2017	0.008	0.14	10.14			3.05
1230	Physalis ixocarpa	Physalis ixocarpa Brot. ex Hornem.	Wild	Angiosperm	Solanaceae	Dicot	Bicellular	Wet	Starchy and starchless	Da Silva	2017	1	https://www.scielo.br/scielo.php?pid=S1806-66902017000200365&script=sci_arttext	Silva et al., 2017	0.008	0.154	7.79			2.81
1231	Physalis minima	Physalis minima L.	Wild	Angiosperm	Solanaceae	Dicot	Bicellular	Wet	Starchy and starchless	Da Silva	2017	1	https://www.scielo.br/scielo.php?pid=S1806-66902017000200365&script=sci_arttext	Silva et al., 2017	0.008	0.128				2.42
1232	Physalis peruviana	Physalis peruviana L.	Wild	Angiosperm	Solanaceae	Dicot	Bicellular	Wet	Starchy and starchless	Da Silva	2017	1	https://www.scielo.br/scielo.php?pid=S1806-66902017000200365&script=sci_arttext	Silva et al., 2017	0.008	0.14	7.84			3.14
1233	Physalis pubescens	Physalis pubescens L.	Wild	Angiosperm	Solanaceae	Dicot	Bicellular	Wet	Starchy and starchless	Da Silva	2017	1	https://www.scielo.br/scielo.php?pid=S1806-66902017000200365&script=sci_arttext	Silva et al., 2017	0.008	0.178	10.79			2.5
1234	Secale cereale	Secale cereale L.	Cultivated	Angiosperm	Poaceae	Monocot	Tricellular	Dry	NA	Jayaprakash	2017	1	http://www.isgpb.com/documents/archive/4-25-31-p-jayaprakash.pdf	Jayaprakash et al., 2017	0.01	19% maltose	1.02
1235	Arabidopsis thaliana	Arabidopsis thaliana (L.) Heynh.	Cultivated	Angiosperm	Brassicaceae	Dicot	Tricellular	Dry	NA	Zhong	2017	1	https://link.springer.com/protocol/10.1007/978-1-4939-7262-3_10	Zhong et al., 2017		0.18	1.62			1					5	1
1236	Nicotiana tabacum	Nicotiana tabacum L.	Cultivated	Angiosperm	Solanaceae	Dicot	Bicellular	Wet	Starchy and starchless	Zhong	2017	1	https://link.springer.com/protocol/10.1007/978-1-4939-7262-3_10	Zhong et al., 2017		0.1	1.62			1 (4H2O)					1	2 (7H2O)
1237	Prunus cerasus	Prunus cerasus L.	Cultivated	Angiosperm	Rosaceae	Dicot	Bicellular	Wet	Starchy and starchless	Aksic	2017	1	http://www.doiserbia.nb.rs/img/doi/0534-0012/2017/0534-00121703791F.pdf	Fotiric-Aksic et al., 2017	0.003	0.14
1238	Aesculus hippocastanum	Aesculus hippocastanum L.	Cultivated	Angiosperm	Sapindaceae	Dicot	Bicellular	Wet	NA	Calic	2017	1	http://www.doiserbia.nb.rs/img/doi/0534-0012/2017/0534-00121701105C.pdf	Calic & Radojevic, 2017	0	0.411	1.62			1.83						0.82 (7H2O)				0.99
1239	Quercus robur	Quercus robur L.	Wild	Angiosperm	Fagaceae	Dicot	Bicellular	Dry	Starchless	Batos	2017	1	http://www.doiserbia.nb.rs/img/doi/0354-4664/2017/0354-46641600084B.pdf	Batos & Miljkovic, 2017	0	0.15
1240	Jasminum malabaricum	Jasminum malabaricum Wight	Wild	Angiosperm	Oleaceae	Dicot	Bicellular	Dry	NA	Pavithra	2018	1	https://apps.webofknowledge.com/full_record.do?product=UA&search_mode=GeneralSearch&qid=6&SID=F5uab7Kq5gGe9qS3m9H&page=1&doc=4&cacheurlFromRightClick=no	Pavithra et al., 2018		0.1	1.62			1.83						1.66
1241	Anemone coronaria	Anemone coronaria L.	Cultivated	Angiosperm	Ranunculaceae	Dicot	Bicellular	Dry	Starchy and starchless	Dhooghe	2018	1	https://link.springer.com/article/10.1007/s10681-018-2294-0#Tab1	Dhooghe et al., 2018		0.1	1.62			2.97 (4H2O)						0.82 (7H2O)				0.99																			2.57 MES
1242	Encephalartos altensteinii	Encephalartos altensteinii Lehm.	Wild	Gymnosperm	Zamiaceae				NA	Nadarajan	2018	1	https://link.springer.com/content/pdf/10.1007%2Fs12229-018-9203-z.pdf	Nadarajan et al., 2018	0	0.1	0.81
1243	Encephalartos latifrons	Encephalartos latifrons Lehm.	Wild	Gymnosperm	Zamiaceae				NA	Nadarajan	2018	1	https://link.springer.com/content/pdf/10.1007%2Fs12229-018-9203-z.pdf	Nadarajan et al., 2018	0	0.1	0.81
1244	Solanum torvum	Solanum torvum Sw.	Wild	Angiosperm	Solanaceae	Dicot	Bicellular	Wet	Starchy and starchless	Jayaprakash	2018	0	http://www.indianjournals.com/ijor.aspx?target=ijor:ijh&volume=75&issue=2&article=011	Jayaprakash et al., 2018	0.0075	20 % maltose	4.05			1.83
1245	Solanum khasianum C.B. Clarke	Solanum aculeatissimum Jacq.	Wild	Angiosperm	Solanaceae	Dicot	Bicellular	Wet	Starchy and starchless	Jayaprakash	2018	0	http://www.indianjournals.com/ijor.aspx?target=ijor:ijh&volume=75&issue=2&article=011	Jayaprakash et al., 2018	0.0075	20 % maltose	4.05			1.83
1246	Solanum trilobatum	Solanum trilobatum L.	Wild	Angiosperm	Solanaceae	Dicot	Bicellular	Wet	Starchy and starchless	Jayaprakash	2018	0	http://www.indianjournals.com/ijor.aspx?target=ijor:ijh&volume=75&issue=2&article=011	Jayaprakash et al., 2018	0.0075	20 % maltose	4.05			1.83
1247	Solanum surrettence	Solanum surattense Burm. f.	Wild	Angiosperm	Solanaceae	Dicot	Bicellular	Wet	Starchy and starchless	Jayaprakash	2018	0	http://www.indianjournals.com/ijor.aspx?target=ijor:ijh&volume=75&issue=2&article=011	Jayaprakash et al., 2018	0.0075	20 % maltose	4.05			1.83
1248	Litchi chinensis	Litchi chinensis Sonn.	Cultivated	Angiosperm	Sapindaceae	Dicot	Bicellular	Wet	NA	Gupta	2018	1	https://www.researchgate.net/profile/Ak_Gupta5/publication/326253989_Pollen_production_viability_and_in_vitro_pollen_germination_of_different_litchi_Litchi_chinensis_genotypes/links/5b98f956a6fdcc59bf8a14b0/Pollen-production-viability-and-in-vitro-pollen-germination-of-different-litchi-Litchi-chinensis-genotypes.pdf	Gupta et al., 2018	0.01	0.15	1.62
1249	Rhododendron longipedicellatum	Rhododendron longipedicellatum Lei Cai & Y.P. Ma	Wild	Angiosperm	Ericaceae	Dicot	Bicellular	Wet	Starchless	Li Tai-Qiang	2018	1	http://www.lykxyj.com/en/article/doi/10.13275/j.cnki.lykxyj.2018.03.008	Li, 2018	0.01	0.1	3.24
1250	Pleioblastus pygmaeus (Miq.) Nakai	Pleioblastus fortunei (Van Houtte) Nakai	Wild	Angiosperm	Poaceae	Monocot	Tricellular	Dry	NA	Fan Ting-Ting	2018	1	http://www.lykxyj.com/en/article/doi/10.13275/j.cnki.lykxyj.2018.03.024	Fan et al., 2018	0	0.1	1.62								4.09 (2H2O)
1251	Hyacinthus orientalis	Hyacinthus orientalis L.	Wild	Angiosperm	Asparagaceae	Monocot	Bicellular	Dry	NA	Pietruszka	2018	1	https://www.nature.com/articles/s41598-018-26015-1.pdf	Pietruszka et al., 2018	0	0.1	0.17			1.83						1.67				0.99
1252	Lilium spp.	Lilium sp.	Cultivated	Angiosperm	Liliaceae	Monocot	Bicellular	Wet	Starchless	Du Xiaohua	2018	1	http://www.fspublishers.org/published_papers/7968_..pdf	Zhu et al., 2018	0.005	0.1	16.18
1253	Punica granatum L.	Punica granatum L.	Cultivated	Angiosperm	Lythraceae	Dicot	Bicellular	Dry	Starchy and starchless	Gokbayrak	2018	1	https://www.researchgate.net/publication/322380598_Effects_of_Foliar-Applied_Brassinosteroid_on_Viability_and_In_Vitro_Germination_of_Pollen_Collected_from_Bisexual_and_Functional_Male_Flowers_of_Pomegranate	Gökbayrak & Engin, 2018	0.01	0.2
1254	Sambucus nigra	Sambucus nigra L.	Cultivated	Angiosperm	Viburnaceae	Dicot	Tricellular	Dry	NA	Kosel	2018	1	https://www.researchgate.net/publication/324202430_Staining_for_viability_testing_germination_and_maturation_of_Sambucus_nigra_L_pollen_in_vitro	Kosel et al., 2018	0	0.15																																	2.57 MES
1255	Orchidaceae	Orchidaceae	Wild	Angiosperm	Orchidaceae	Monocot	Bicellular	Wet	Starchless	Lee Yi	2018	1	https://link.springer.com/content/pdf/10.1007/978-1-4939-7771-0.pdf	Lee & Yeung, 2018	0.01	0.01	16.18
1256	Brassica rapa	Brassica rapa L.	Wild	Angiosperm	Brassicaceae	Dicot	Tricellular	Dry	NA	Blasiak	2001	1	https://link.springer.com/content/pdf/10.1007/s004250000495.pdf	Blasiak et al., 2001	0.011
1257	Nicotiana alata	Nicotiana alata Link & Otto	Wild	Angiosperm	Solanaceae	Dicot	Bicellular	Wet	Starchy and starchless	Blasiak	2001	1	https://link.springer.com/content/pdf/10.1007/s004250000495.pdf	Blasiak et al., 2001	0.011
1258	Lilium formosanum	Lilium formosanum Wallace	Cultivated	Angiosperm	Liliaceae	Monocot	Bicellular	Wet	Starchless	Blasiak	2001	1	https://link.springer.com/content/pdf/10.1007/s004250000495.pdf	Blasiak et al., 2001	0.011
1259	Pieris japonica	Pieris japonica (Thunb.) D. Don ex G. Don	Wild	Angiosperm	Ericaceae	Dicot	Bicellular	Wet	Starchless	Blasiak	2001	1	https://link.springer.com/content/pdf/10.1007/s004250000495.pdf	Blasiak et al., 2001	0.011
1260	Andromeda glaucophylla	Andromeda glaucophylla Link	Wild	Angiosperm	Ericaceae	Dicot	Bicellular	Wet	Starchless	Blasiak	2001	1	https://link.springer.com/content/pdf/10.1007/s004250000495.pdf	Blasiak et al., 2001	0.011
1261	Convallaria majalis	Convallaria majalis L.	Wild	Angiosperm	Asparagaceae	Monocot	Bicellular	Dry	NA	Blasiak	2001	1	https://link.springer.com/content/pdf/10.1007/s004250000495.pdf	Blasiak et al., 2001	0.011
1262	Eccremocarpus scaber	Eccremocarpus scaber Ruiz & Pav.	Wild	Angiosperm	Bignoniaceae	Dicot	Bicellular	Wet	Starchy and starchless	Blasiak	2001	1	https://link.springer.com/content/pdf/10.1007/s004250000495.pdf	Blasiak et al., 2001	0.011
1263	Fritillaria meleagris	Fritillaria meleagris L.	Wild	Angiosperm	Liliaceae	Monocot	Bicellular	Wet	Starchless	Blasiak	2001	1	https://link.springer.com/content/pdf/10.1007/s004250000495.pdf	Blasiak et al., 2001	0.011
1264	Audouinia capitata	Audouinia capitata (L.) Brongn.	Wild	Angiosperm	Bruniaceae	Dicot	NA	NA	NA	Delange	1993	1	https://reader.elsevier.com/reader/sd/pii/S0254629916307621?token=B47A1632E7400C658C9AC7352A84BB1038C648F6FB11274266600EBCA851DC4E686B25C0CA92CDD3A538D295836E1E62	De Lange & Boucher, 1993	0.6% Difco Bacto agar	6.67%, 0.54% fructose
1265	Heteropanax fragrans	Heteropanax fragrans (Roxb.) Seem.	Wild	Angiosperm	Araliaceae	Dicot	Tricellular	Wet	Starchless	Kumar	1993	0	http://apps.webofknowledge.com/full_record.do?product=UA&search_mode=GeneralSearch&qid=7&SID=C52uPgs5IM6A9sqCHHe&page=3&doc=28&cacheurlFromRightClick=no	Kumar et al, 1993	0	0.2
1266	Aesculus hippocastanum L.	Aesculus hippocastanum L.	Wild	Angiosperm	Sapindaceae	Dicot	Bicellular	Wet	NA	Rosbakh	unpublished	0		Na	0	0.15	0.17								1.66 (6H2O)					0.99																			0.75 TRIS
1267	Agrimonia eupatoria	Agrimonia eupatoria L.	Wild	Angiosperm	Rosaceae	Dicot	Bicellular	Wet	Starchy and starchless	Rosbakh	unpublished	0		Na	0		0.81								5.99 (2H2O)	1.51 (7H2O)		0.1 (H2O)		9.4		0.63	2.35	0.01	0.02		0.01 (5H20)		0.04	5.16		0.01		0.01	0.01 (B1), 0.01 (B6)
1268	Ajuga repens Gueldenst. ex Ledeb.	Ajuga reptans L.	Wild	Angiosperm	Lamiaceae	Dicot	Bicellular	Dry	NA	Rosbakh	unpublished	0		Na	0	0.2	1.62			1.83						0.82 (7H2O)				0.99
1269	Ajuga repens Gueldenst. ex Ledeb.	Ajuga reptans L.	Wild	Angiosperm	Lamiaceae	Dicot	Bicellular	Dry	NA	Rosbakh	unpublished	0		Na	0		0.81								5.99 (2H2O)	1.51 (7H2O)		0.1 (H2O)		9.4		0.63	2.35	0.01	0.02		0.01 (5H20)		0.04	5.16		0.01		0.01	0.01 (B1), 0.01 (B6)
1270	Ajuga repens Gueldenst. ex Ledeb.	Ajuga reptans L.	Wild	Angiosperm	Lamiaceae	Dicot	Bicellular	Dry	NA	Rosbakh	unpublished	0		Na	0		0.81								5.99 (2H2O)	1.51 (7H2O)		0.1 (H2O)		9.4		0.63	2.35	0.01	0.02		0.01 (5H20)		0.04	5.16		0.01		0.01	0.01 (B1), 0.01 (B6)
1271	Alnus glutinosa	Alnus glutinosa (L.) Gaertn.	Wild	Angiosperm	Betulaceae	Dicot	Bicellular	Dry	Starchy and starchless	Rosbakh	unpublished	0		Na	0	0.25	1.62			1.83						0.82 (7H2O)				0.99
1272	Alnus glutinosa	Alnus glutinosa (L.) Gaertn.	Wild	Angiosperm	Betulaceae	Dicot	Bicellular	Dry	Starchy and starchless	Rosbakh	unpublished	0		Na	0	0.25	0.81								5.44 (2H2O)	0.82 (7H2O)				0.99
1273	Alnus glutinosa	Alnus glutinosa (L.) Gaertn.	Wild	Angiosperm	Betulaceae	Dicot	Bicellular	Dry	Starchy and starchless	Rosbakh	unpublished	0		Na	0	0.1	0.17								1.66 (6H2O)					0.99																			0.75 TRIS
1274	Alnus glutinosa	Alnus glutinosa (L.) Gaertn.	Wild	Angiosperm	Betulaceae	Dicot	Bicellular	Dry	Starchy and starchless	Rosbakh	unpublished	0		Na	1% phytagel	0.1	1.62			1					1	1
1275	Anemona nemorosa	Anemone nemorosa L.	Wild	Angiosperm	Ranunculaceae	Dicot	Bicellular	Dry	Starchy and starchless	Rosbakh	unpublished	0		Na	1% phytagel	0.15	1.62			1					1	1
1276	Anemone nemorosa	Anemone nemorosa L.	Wild	Angiosperm	Ranunculaceae	Dicot	Bicellular	Dry	Starchy and starchless	Rosbakh	unpublished	0		Na	0		0.81								5.99 (2H2O)	1.51 (7H2O)		0.1 (H2O)		9.4		0.63	2.35	0.01	0.02		0.01 (5H20)		0.04	5.16		0.01		0.01	0.01 (B1), 0.01 (B6)
1277	Anemone ranunculoides	Anemone ranunculoides L.	Wild	Angiosperm	Ranunculaceae	Dicot	Bicellular	Dry	Starchy and starchless	Rosbakh	unpublished	0		Na	0		0.81								5.99 (2H2O)	1.51 (7H2O)		0.1 (H2O)		9.4		0.63	2.35	0.01	0.02		0.01 (5H20)		0.04	5.16		0.01		0.01	0.01 (B1), 0.01 (B6)
1278	Anemone ranunculoides	Anemone ranunculoides L.	Wild	Angiosperm	Ranunculaceae	Dicot	Bicellular	Dry	Starchy and starchless	Rosbakh	unpublished	0		Na	0	0.22	1.62			1.83						0.82 (7H2O)				0.99
1279	Anemone ranunculoides	Anemone ranunculoides L.	Wild	Angiosperm	Ranunculaceae	Dicot	Bicellular	Dry	Starchy and starchless	Rosbakh	unpublished	0		Na	0	0.17	0.81								5.44 (2H2O)	0.82 (7H2O)				0.99
1280	Anemone ranunculoides	Anemone ranunculoides L.	Wild	Angiosperm	Ranunculaceae	Dicot	Bicellular	Dry	Starchy and starchless	Rosbakh	unpublished	0		Na	0	0.25	0.17								1.66 (6H2O)					0.99																			0.75 TRIS
1281	Anemone ranunculoides	Anemone ranunculoides L.	Wild	Angiosperm	Ranunculaceae	Dicot	Bicellular	Dry	Starchy and starchless	Rosbakh	unpublished	0		Na	0		0.81								5.99 (2H2O)	1.51 (7H2O)		0.1 (H2O)		9.4		0.63	2.35	0.01	0.02		0.01 (5H20)		0.04	5.16		0.01		0.01	0.01 (B1), 0.01 (B6)
1282	Anemone ranunculoides	Anemone ranunculoides L.	Wild	Angiosperm	Ranunculaceae	Dicot	Bicellular	Dry	Starchy and starchless	Rosbakh	unpublished	0		Na	0		0.81								5.99 (2H2O)	1.51 (7H2O)		0.1 (H2O)		9.4		0.63	2.35	0.01	0.02		0.01 (5H20)		0.04	5.16		0.01		0.01	0.01 (B1), 0.01 (B6)
1283	Anemone ranunculoides	Anemone ranunculoides L.	Wild	Angiosperm	Ranunculaceae	Dicot	Bicellular	Dry	Starchy and starchless	Rosbakh	unpublished	0		Na	1% phytagel	0.15	1.62			1					1	1
1284	Anthyllis vulneraria	Anthyllis vulneraria L.	Wild	Angiosperm	Fabaceae	Dicot	Bicellular	Wet	NA	Rosbakh	unpublished	0		Na	0		0.81								5.99 (2H2O)	1.51 (7H2O)		0.1 (H2O)		9.4		0.63	2.35	0.01	0.02		0.01 (5H20)		0.04	5.16		0.01		0.01	0.01 (B1), 0.01 (B6)
1285	Avenula pratensis (L.) Dumort.	Helictotrichon pratense (L.) Pilg.	Wild	Angiosperm	Poaceae	Monocot	Tricellular	Dry	NA	Rosbakh	unpublished	0		Na	0	0.27	1.62			1.83						0.82 (7H2O)				0.99
1286	Avenula pratensis (L.) Dumort.	Helictotrichon pratense (L.) Pilg.	Wild	Angiosperm	Poaceae	Monocot	Tricellular	Dry	NA	Rosbakh	unpublished	0		Na	1% phytagel	0.25	1.62			1					1	1
1287	Betula nana L.	Betula nana L.	Wild	Angiosperm	Betulaceae	Dicot	Bicellular	Dry	Starchy and starchless	Rosbakh	unpublished	0		Na	0	0.1	1.62			1.83						0.82 (7H2O)				0.99
1288	Betula pendula Roth	Betula pendula Roth	Cultivated	Angiosperm	Betulaceae	Dicot	Bicellular	Dry	Starchy and starchless	Rosbakh	unpublished	0		Na	0	0.2	1.62			1.83						0.82 (7H2O)				0.99
1289	Caltha palustris	Caltha palustris L.	Wild	Angiosperm	Ranunculaceae	Dicot	Bicellular	Dry	Starchy and starchless	Rosbakh	unpublished	0		Na	0	0.11	1.62			1					1	1
1290	Caltha palustris	Caltha palustris L.	Wild	Angiosperm	Ranunculaceae	Dicot	Bicellular	Dry	Starchy and starchless	Rosbakh	unpublished	0		Na	0	0.15	1.62			1					1	1
1291	Campanula rotundifolia	Campanula rotundifolia L.	Wild	Angiosperm	Campanulaceae	Dicot	Bicellular	Dry	Starchless	Rosbakh	unpublished	0		Na	0	0.2	1.62			1.83						0.82 (7H2O)				0.99
1292	Campanula rotundifolia	Campanula rotundifolia L.	Wild	Angiosperm	Campanulaceae	Dicot	Bicellular	Dry	Starchless	Rosbakh	unpublished	0		Na	0	0.2	0.81								5.44 (2H2O)	0.82 (7H2O)				0.99
1293	Campanula rotundifolia	Campanula rotundifolia L.	Wild	Angiosperm	Campanulaceae	Dicot	Bicellular	Dry	Starchless	Rosbakh	unpublished	0		Na	0		0.81								5.99 (2H2O)	1.51 (7H2O)		0.1 (H2O)		9.4		0.63	2.35	0.01	0.02		0.01 (5H20)		0.04	5.16		0.01		0.01	0.01 (B1), 0.01 (B6)
1294	Campanula patula	Campanula patula L.	Wild	Angiosperm	Campanulaceae	Dicot	Bicellular	Dry	Starchless	Rosbakh	unpublished	0		Na	0	0.2	1.62			1.83						0.82 (7H2O)				0.99
1295	Campanula patula	Campanula patula L.	Wild	Angiosperm	Campanulaceae	Dicot	Bicellular	Dry	Starchless	Rosbakh	unpublished	0		Na	0	0.17	0.81								5.44 (2H2O)	0.82 (7H2O)				0.99
1296	Campanula patula	Campanula patula L.	Wild	Angiosperm	Campanulaceae	Dicot	Bicellular	Dry	Starchless	Rosbakh	unpublished	0		Na	0		0.81								5.99 (2H2O)	1.51 (7H2O)		0.1 (H2O)		9.4		0.63	2.35	0.01	0.02		0.01 (5H20)		0.04	5.16		0.01		0.01	0.01 (B1), 0.01 (B6)
1297	Campanula patula	Campanula patula L.	Wild	Angiosperm	Campanulaceae	Dicot	Bicellular	Dry	Starchless	Rosbakh	unpublished	0		Na	0		0.81								5.99 (2H2O)	1.51 (7H2O)		0.1 (H2O)		9.4		0.63	2.35	0.01	0.02		0.01 (5H20)		0.04	5.16		0.01		0.01	0.01 (B1), 0.01 (B6)
1298	Campanula scheuchzerii	Campanula scheuchzeri Vill.	Wild	Angiosperm	Campanulaceae	Dicot	Bicellular	Dry	Starchless	Rosbakh	unpublished	0		Na	0	0.16	1.62			1					1	1
1299	Cardamine eriophyllon	Cardamine eriophyllum	Wild	Angiosperm	Brassicaceae	Dicot	Tricellular	Dry	NA	Rosbakh	unpublished	0		Na	0	0.2	1.62			1					1	1
1300	Cardamine pratensis	Cardamine pratensis L.	Wild	Angiosperm	Brassicaceae	Dicot	Tricellular	Dry	NA	Rosbakh	unpublished	0		Na	0	0.2	1.62			1					1	1
1301	Carex acuta	Carex acuta L.	Wild	Angiosperm	Cyperaceae	Monocot	Tricellular	Dry	Starchy and starchless	Rosbakh	unpublished	0		Na	0	0.15	1.62			1					1	1
1302	Carex caryophyllea	Carex caryophyllea Latourr.	Wild	Angiosperm	Cyperaceae	Monocot	Tricellular	Dry	Starchy and starchless	Rosbakh	unpublished	0		Na	0	0.16	1.62			1					1	1
1303	Carex caryophyllea	Carex caryophyllea Latourr.	Wild	Angiosperm	Cyperaceae	Monocot	Tricellular	Dry	Starchy and starchless	Rosbakh	unpublished	0		Na	0	0.15	0.81								5.44 (2H2O)	0.82 (7H2O)				0.99
1304	Carex caryophyllea	Carex caryophyllea Latourr.	Wild	Angiosperm	Cyperaceae	Monocot	Tricellular	Dry	Starchy and starchless	Rosbakh	unpublished	0		Na	0	0.25	0.81								5.44 (2H2O)	0.82 (7H2O)				0.99
1305	Carex caryophyllea	Carex caryophyllea Latourr.	Wild	Angiosperm	Cyperaceae	Monocot	Tricellular	Dry	Starchy and starchless	Rosbakh	unpublished	0		Na	0		0.81								5.99 (2H2O)	1.51 (7H2O)		0.1 (H2O)		9.4		0.63	2.35	0.01	0.02		0.01 (5H20)		0.04	5.16		0.01		0.01	0.01 (B1), 0.01 (B6)
1306	Carex caryophyllea Latourr.	Carex caryophyllea Latourr.	Wild	Angiosperm	Cyperaceae	Monocot	Tricellular	Dry	Starchy and starchless	Rosbakh	unpublished	0		Na	0	0.15	1.62			1					1	1
1307	Carex caryophyllea Latourr.	Carex caryophyllea Latourr.	Wild	Angiosperm	Cyperaceae	Monocot	Tricellular	Dry	Starchy and starchless	Rosbakh	unpublished	0		Na	0	0.14	1.62			1					1	1
1308	Carex disticha	Carex disticha Huds.	Wild	Angiosperm	Cyperaceae	Monocot	Tricellular	Dry	Starchy and starchless	Rosbakh	unpublished	0		Na	0	0.16	1.62			1					1	1
1309	Carex firma	Carex firma Host	Wild	Angiosperm	Cyperaceae	Monocot	Tricellular	Dry	Starchy and starchless	Rosbakh	unpublished	0		Na	0	0.16	1.62			1					1	1
1310	Carex flacca	Carex flacca Schreb.	Wild	Angiosperm	Cyperaceae	Monocot	Tricellular	Dry	Starchy and starchless	Rosbakh	unpublished	0		Na	0	0.14	1.62			1					1	1
1311	Carex flacca	Carex flacca Schreb.	Wild	Angiosperm	Cyperaceae	Monocot	Tricellular	Dry	Starchy and starchless	Rosbakh	unpublished	0		Na	0	0.18	1.62			1					1	1
1312	Carex flacca	Carex flacca Schreb.	Wild	Angiosperm	Cyperaceae	Monocot	Tricellular	Dry	Starchy and starchless	Rosbakh	unpublished	0		Na	0	0.1	1.62			1.83						0.82 (7H2O)				0.99
1313	Carex flacca	Carex flacca Schreb.	Wild	Angiosperm	Cyperaceae	Monocot	Tricellular	Dry	Starchy and starchless	Rosbakh	unpublished	0		Na	0	0.07	0.81								5.44 (2H2O)	0.82 (7H2O)				0.99
1314	Carex gracilis Curtis	Carex acuta L.	Wild	Angiosperm	Cyperaceae	Monocot	Tricellular	Dry	Starchy and starchless	Rosbakh	unpublished	0		Na	0	0.1	1.62			1.83						0.82 (7H2O)				0.99
1315	Carex gracilis Curtis	Carex acuta L.	Wild	Angiosperm	Cyperaceae	Monocot	Tricellular	Dry	Starchy and starchless	Rosbakh	unpublished	0		Na	0	0.1	0.81								5.44 (2H2O)	0.82 (7H2O)				0.99
1316	Carex gracilis Curtis	Carex acuta L.	Wild	Angiosperm	Cyperaceae	Monocot	Tricellular	Dry	Starchy and starchless	Rosbakh	unpublished	0		Na	1% phytagel	0.1	1.62			1					1	1
1317	Carex ornitopoda	Carex ornithopoda Willd.	Wild	Angiosperm	Cyperaceae	Monocot	Tricellular	Dry	Starchy and starchless	Rosbakh	unpublished	0		Na	1% phytagel	0.1	1.62			1					1	1
1318	Carpinus betulus L.	Carpinus betulus L.	Wild	Angiosperm	Betulaceae	Dicot	Bicellular	Dry	Starchy and starchless	Rosbakh	unpublished	0		Na	0	0.1	1.62			1.83						0.82 (7H2O)				0.99
1319	Cerastium arvense	Cerastium arvense L.	Wild	Angiosperm	Caryophyllaceae	Dicot	Tricellular	Dry	Starchless	Rosbakh	unpublished	0		Na	0	0.25	1.62			1.83						0.82 (7H2O)				0.99
1320	Chamaecytisus ratisbonensis (Schaeff.) Rothm.	Cytisus ratisbonensis Schaeff.	Wild	Angiosperm	Fabaceae	Dicot	Bicellular	Wet	NA	Rosbakh	unpublished	0		Na	0	0.2	1.62			1.83						0.82 (7H2O)				0.99
1321	Chamaecytisus ratisbonensis (Schaeff.) Rothm.	Cytisus ratisbonensis Schaeff.	Wild	Angiosperm	Fabaceae	Dicot	Bicellular	Wet	NA	Rosbakh	unpublished	0		Na	0	0.15	0.81								5.44 (2H2O)	0.82 (7H2O)				0.99
1322	Chamaecytisus ratisbonensis (Schaeff.) Rothm.	Cytisus ratisbonensis Schaeff.	Wild	Angiosperm	Fabaceae	Dicot	Bicellular	Wet	NA	Rosbakh	unpublished	0		Na	0		0.81								5.99 (2H2O)	1.51 (7H2O)		0.1 (H2O)		9.4		0.63	2.35	0.01	0.02		0.01 (5H20)		0.04	5.16		0.01		0.01	0.01 (B1), 0.01 (B6)
1323	Colchicum autumnale	Colchicum autumnale L.	Wild	Angiosperm	Colchicaceae	Monocot	Bicellular	Dry	NA	Rosbakh	unpublished	0		Na	0	0.15	1.62			1.83						0.82 (7H2O)				0.99
1324	Colchicum autumnale	Colchicum autumnale L.	Wild	Angiosperm	Colchicaceae	Monocot	Bicellular	Dry	NA	Rosbakh	unpublished	0		Na	0	0.15	0.81								5.44 (2H2O)	0.82 (7H2O)				0.99
1325	Colchicum autumnale	Colchicum autumnale L.	Wild	Angiosperm	Colchicaceae	Monocot	Bicellular	Dry	NA	Rosbakh	unpublished	0		Na	0	0.1	0.17								1.66 (6H2O)					0.99																			0.75 TRIS
1326	Colchicum autumnale	Colchicum autumnale L.	Wild	Angiosperm	Colchicaceae	Monocot	Bicellular	Dry	NA	Rosbakh	unpublished	0		Na	0		0.81								5.99 (2H2O)	1.51 (7H2O)		0.1 (H2O)		9.4		0.63	2.35	0.01	0.02		0.01 (5H20)		0.04	5.16		0.01		0.01	0.01 (B1), 0.01 (B6)
1327	Colchicum autumnale	Colchicum autumnale L.	Wild	Angiosperm	Colchicaceae	Monocot	Bicellular	Dry	NA	Rosbakh	unpublished	0		Na	0		0.81								5.99 (2H2O)	1.51 (7H2O)		0.1 (H2O)		9.4		0.63	2.35	0.01	0.02		0.01 (5H20)		0.04	5.16		0.01		0.01	0.01 (B1), 0.01 (B6)
1328	Corydalis carva	Corydalis cava (L.) Schweigg. & Körte	Wild	Angiosperm	Papaveraceae	Dicot	Bicellular	Dry	Starchless	Rosbakh	unpublished	0		Na	0	0.25	0.81								5.44 (2H2O)	0.82 (7H2O)				0.99
1329	Corydalis carva	Corydalis cava (L.) Schweigg. & Körte	Wild	Angiosperm	Papaveraceae	Dicot	Bicellular	Dry	Starchless	Rosbakh	unpublished	0		Na	0		0.81								5.99 (2H2O)	1.51 (7H2O)		0.1 (H2O)		9.4		0.63	2.35	0.01	0.02		0.01 (5H20)		0.04	5.16		0.01		0.01	0.01 (B1), 0.01 (B6)
1330	Corydalis carva	Corydalis cava (L.) Schweigg. & Körte	Wild	Angiosperm	Papaveraceae	Dicot	Bicellular	Dry	Starchless	Rosbakh	unpublished	0		Na	0	0.2	1.62			1.83						0.82 (7H2O)				0.99
1331	Corydalis carva	Corydalis cava (L.) Schweigg. & Körte	Wild	Angiosperm	Papaveraceae	Dicot	Bicellular	Dry	Starchless	Rosbakh	unpublished	0		Na	0	0.2	0.81								5.44 (2H2O)	0.82 (7H2O)				0.99
1332	Corydalis carva	Corydalis cava (L.) Schweigg. & Körte	Wild	Angiosperm	Papaveraceae	Dicot	Bicellular	Dry	Starchless	Rosbakh	unpublished	0		Na	0	0.17	0.17								1.66 (6H2O)					0.99																			0.75 TRIS
1333	Corydalis carva	Corydalis cava (L.) Schweigg. & Körte	Wild	Angiosperm	Papaveraceae	Dicot	Bicellular	Dry	Starchless	Rosbakh	unpublished	0		Na	0		0.81								5.99 (2H2O)	1.51 (7H2O)		0.1 (H2O)		9.4		0.63	2.35	0.01	0.02		0.01 (5H20)		0.04	5.16		0.01		0.01	0.01 (B1), 0.01 (B6)
1334	Corydalis carva	Corydalis cava (L.) Schweigg. & Körte	Wild	Angiosperm	Papaveraceae	Dicot	Bicellular	Dry	Starchless	Rosbakh	unpublished	0		Na	0		0.81								5.99 (2H2O)	1.51 (7H2O)		0.1 (H2O)		9.4		0.63	2.35	0.01	0.02		0.01 (5H20)		0.04	5.16		0.01		0.01	0.01 (B1), 0.01 (B6)
1335	Corydalis carva	Corydalis cava (L.) Schweigg. & Körte	Wild	Angiosperm	Papaveraceae	Dicot	Bicellular	Dry	Starchless	Rosbakh	unpublished	0		Na	1% phytagel	0.15	1.62			1					1	1
1336	Corylus avellana	Corylus avellana L.	Wild	Angiosperm	Betulaceae	Dicot	Bicellular	Dry	Starchy and starchless	Rosbakh	unpublished	0		Na	0	0.2	1.62			1.83						0.82 (7H2O)				0.99
1337	Corylus avellana	Corylus avellana L.	Wild	Angiosperm	Betulaceae	Dicot	Bicellular	Dry	Starchy and starchless	Rosbakh	unpublished	0		Na	0	0.2	0.81								5.44 (2H2O)	0.82 (7H2O)				0.99
1338	Corylus avellana	Corylus avellana L.	Wild	Angiosperm	Betulaceae	Dicot	Bicellular	Dry	Starchy and starchless	Rosbakh	unpublished	0		Na	0	0.2	0.17								1.66 (6H2O)					0.99																			0.75 TRIS
1339	Corylus avellana	Corylus avellana L.	Wild	Angiosperm	Betulaceae	Dicot	Bicellular	Dry	Starchy and starchless	Rosbakh	unpublished	0		Na	1% phytagel	0.1	1.62			1					1	1
1340	Dactylorhiza maculata	Dactylorhiza maculata (L.) Soó	Wild	Angiosperm	Orchidaceae	Monocot	Bicellular	Wet	Starchless	Rosbakh	unpublished	0		Na	0	0.15	1.62			1.83						0.82 (7H2O)				0.99
1341	Dactylorhiza maculata	Dactylorhiza maculata (L.) Soó	Wild	Angiosperm	Orchidaceae	Monocot	Bicellular	Wet	Starchless	Rosbakh	unpublished	0		Na	0		0.81								5.99 (2H2O)	1.51 (7H2O)		0.1 (H2O)		9.4		0.63	2.35	0.01	0.02		0.01 (5H20)		0.04	5.16		0.01		0.01	0.01 (B1), 0.01 (B6)
1342	Dianthus deltoides	Dianthus deltoides L.	Wild	Angiosperm	Caryophyllaceae	Dicot	Tricellular	Dry	Starchless	Rosbakh	unpublished	0		Na	0	0.1	1.62			1.83						0.82 (7H2O)				0.99
1343	Dianthus deltoides	Dianthus deltoides L.	Wild	Angiosperm	Caryophyllaceae	Dicot	Tricellular	Dry	Starchless	Rosbakh	unpublished	0		Na	0	0.12	0.81								5.44 (2H2O)	0.82 (7H2O)				0.99
1344	Dianthus deltoides	Dianthus deltoides L.	Wild	Angiosperm	Caryophyllaceae	Dicot	Tricellular	Dry	Starchless	Rosbakh	unpublished	0		Na	0		0.81								5.99 (2H2O)	1.51 (7H2O)		0.1 (H2O)		9.4		0.63	2.35	0.01	0.02		0.01 (5H20)		0.04	5.16		0.01		0.01	0.01 (B1), 0.01 (B6)
1345	Dianthus deltoides	Dianthus deltoides L.	Wild	Angiosperm	Caryophyllaceae	Dicot	Tricellular	Dry	Starchless	Rosbakh	unpublished	0		Na	0		0.81								5.99 (2H2O)	1.51 (7H2O)		0.1 (H2O)		9.4		0.63	2.35	0.01	0.02		0.01 (5H20)		0.04	5.16		0.01		0.01	0.01 (B1), 0.01 (B6)
1346	Dianthus superbus	Dianthus superbus L.	Wild	Angiosperm	Caryophyllaceae	Dicot	Tricellular	Dry	Starchless	Rosbakh	unpublished	0		Na	0	0.05	1.62			1					1	1
1347	Dryas octopetala	Dryas octopetala L.	Wild	Angiosperm	Rosaceae	Dicot	Bicellular	Dry	Starchy and starchless	Rosbakh	unpublished	0		Na	0	0.16	1.62			1					1	1
1348	Dryas octopetala	Dryas octopetala L.	Wild	Angiosperm	Rosaceae	Dicot	Bicellular	Dry	Starchy and starchless	Rosbakh	unpublished	0		Na	0	0.11	1.62			1					1	1
1349	Erica carnea L.	Erica herbacea L.	Wild	Angiosperm	Ericaceae	Dicot	Bicellular	Wet	Starchless	Rosbakh	unpublished	0		Na	0	0.13	1.62			1					1	1
1350	Erica carnea L.	Erica herbacea L.	Wild	Angiosperm	Ericaceae	Dicot	Bicellular	Wet	Starchless	Rosbakh	unpublished	0		Na	0	0.2	1.62			1					1	1
1351	Eriophorum vaginatum	Eriophorum vaginatum L.	Wild	Angiosperm	Cyperaceae	Monocot	Tricellular	Dry	Starchy and starchless	Rosbakh	unpublished	0		Na	0	0.1	1.62			1.83						0.82 (7H2O)				0.99
1352	Eriophorum vaginatum	Eriophorum vaginatum L.	Wild	Angiosperm	Cyperaceae	Monocot	Tricellular	Dry	Starchy and starchless	Rosbakh	unpublished	0		Na	0	0.12	0.81								5.44 (2H2O)	0.82 (7H2O)				0.99
1353	Erysimum odoratum	Erysimum odoratum Ehrh.	Wild	Angiosperm	Brassicaceae	Dicot	Tricellular	Dry	NA	Rosbakh	unpublished	0		Na	0	0.27	1.62			1.83						0.82 (7H2O)				0.99
1354	Erysimum odoratum	Erysimum odoratum Ehrh.	Wild	Angiosperm	Brassicaceae	Dicot	Tricellular	Dry	NA	Rosbakh	unpublished	0		Na	0	0.3	0.81								5.44 (2H2O)	0.82 (7H2O)				0.99
1355	Erysimum odoratum	Erysimum odoratum Ehrh.	Wild	Angiosperm	Brassicaceae	Dicot	Tricellular	Dry	NA	Rosbakh	unpublished	0		Na	0	0.2	0.17								1.66 (6H2O)					0.99																			0.75 TRIS
1356	Erysimum odoratum	Erysimum odoratum Ehrh.	Wild	Angiosperm	Brassicaceae	Dicot	Tricellular	Dry	NA	Rosbakh	unpublished	0		Na	0		0.81								5.99 (2H2O)	1.51 (7H2O)		0.1 (H2O)		9.4		0.63	2.35	0.01	0.02		0.01 (5H20)		0.04	5.16		0.01		0.01	0.01 (B1), 0.01 (B6)
1357	Fagus sylvatica L.	Fagus sylvatica L.	Wild	Angiosperm	Fagaceae	Dicot	Bicellular	Dry	Starchless	Rosbakh	unpublished	0		Na	0	0.05	0.17								1.66 (6H2O)					0.99																			0.75 TRIS
1358	Ficaria verna	Ficaria verna Huds.	Wild	Angiosperm	Ranunculaceae	Dicot	Bicellular	Dry	Starchy and starchless	Rosbakh	unpublished	0		Na	0		0.81								5.99 (2H2O)	1.51 (7H2O)		0.1 (H2O)		9.4		0.63	2.35	0.01	0.02		0.01 (5H20)		0.04	5.16		0.01		0.01	0.01 (B1), 0.01 (B6)
1359	Fillipendula ulmaria	Filipendula ulmaria (L.) Maxim.	Wild	Angiosperm	Rosaceae	Dicot	Bicellular	Dry	Starchy and starchless	Rosbakh	unpublished	0		Na	0	0.2	1.62			1.83						0.82 (7H2O)				0.99
1360	Fillipendula ulmaria	Filipendula ulmaria (L.) Maxim.	Wild	Angiosperm	Rosaceae	Dicot	Bicellular	Dry	Starchy and starchless	Rosbakh	unpublished	0		Na	0	0.15	0.81								5.44 (2H2O)	0.82 (7H2O)				0.99
1361	Fillipendula ulmaria	Filipendula ulmaria (L.) Maxim.	Wild	Angiosperm	Rosaceae	Dicot	Bicellular	Dry	Starchy and starchless	Rosbakh	unpublished	0		Na	0	0.1	0.17								1.66 (6H2O)					0.99																			0.75 TRIS
1362	Fillipendula ulmaria	Filipendula ulmaria (L.) Maxim.	Wild	Angiosperm	Rosaceae	Dicot	Bicellular	Dry	Starchy and starchless	Rosbakh	unpublished	0		Na	1% phytagel	0.2	1.62			1					1	1
1363	Fragaria vesca	Fragaria vesca L.	Wild	Angiosperm	Rosaceae	Dicot	Bicellular	Wet	Starchy and starchless	Rosbakh	unpublished	0		Na	0		0.81								5.99 (2H2O)	1.51 (7H2O)		0.1 (H2O)		9.4		0.63	2.35	0.01	0.02		0.01 (5H20)		0.04	5.16		0.01		0.01	0.01 (B1), 0.01 (B6)
1364	Fraxinus exclesior	Fraxinus excelsior L.	Wild	Angiosperm	Oleaceae	Dicot	Bicellular	Dry	NA	Rosbakh	unpublished	0		Na	0	0.17	1.62			1.83						0.82 (7H2O)				0.99
1365	Fraxinus exclesior	Fraxinus excelsior L.	Wild	Angiosperm	Oleaceae	Dicot	Bicellular	Dry	NA	Rosbakh	unpublished	0		Na	0	0.1	0.81								5.44 (2H2O)	0.82 (7H2O)				0.99
1366	Fraxinus exclesior	Fraxinus excelsior L.	Wild	Angiosperm	Oleaceae	Dicot	Bicellular	Dry	NA	Rosbakh	unpublished	0		Na	0	0.12	0.17								1.66 (6H2O)					0.99																			0.75 TRIS
1367	Fraxinus exclesior	Fraxinus excelsior L.	Wild	Angiosperm	Oleaceae	Dicot	Bicellular	Dry	NA	Rosbakh	unpublished	0		Na	0		0.81								5.99 (2H2O)	1.51 (7H2O)		0.1 (H2O)		9.4		0.63	2.35	0.01	0.02		0.01 (5H20)		0.04	5.16		0.01		0.01	0.01 (B1), 0.01 (B6)
1368	Fraxinus exclesior	Fraxinus excelsior L.	Wild	Angiosperm	Oleaceae	Dicot	Bicellular	Dry	NA	Rosbakh	unpublished	0		Na	0		0.81								5.99 (2H2O)	1.51 (7H2O)		0.1 (H2O)		9.4		0.63	2.35	0.01	0.02		0.01 (5H20)		0.04	5.16		0.01		0.01	0.01 (B1), 0.01 (B6)
1369	Fraxinus exclesior	Fraxinus excelsior L.	Wild	Angiosperm	Oleaceae	Dicot	Bicellular	Dry	NA	Rosbakh	unpublished	0		Na	1% phytagel	0.15	1.62			1					1	1
1370	Gagea lutea	Gagea lutea (L.) Ker Gawl.	Wild	Angiosperm	Liliaceae	Monocot	Bicellular	Wet	Starchless	Rosbakh	unpublished	0		Na	0	0.1	1.62			1.83						0.82 (7H2O)				0.99
1371	Gagea lutea	Gagea lutea (L.) Ker Gawl.	Wild	Angiosperm	Liliaceae	Monocot	Bicellular	Wet	Starchless	Rosbakh	unpublished	0		Na	0	0.1	0.81								5.44 (2H2O)	0.82 (7H2O)				0.99
1372	Gagea lutea	Gagea lutea (L.) Ker Gawl.	Wild	Angiosperm	Liliaceae	Monocot	Bicellular	Wet	Starchless	Rosbakh	unpublished	0		Na	0		0.81								5.99 (2H2O)	1.51 (7H2O)		0.1 (H2O)		9.4		0.63	2.35	0.01	0.02		0.01 (5H20)		0.04	5.16		0.01		0.01	0.01 (B1), 0.01 (B6)
1373	Gagea lutea	Gagea lutea (L.) Ker Gawl.	Wild	Angiosperm	Liliaceae	Monocot	Bicellular	Wet	Starchless	Rosbakh	unpublished	0		Na	0		0.81								5.99 (2H2O)	1.51 (7H2O)		0.1 (H2O)		9.4		0.63	2.35	0.01	0.02		0.01 (5H20)		0.04	5.16		0.01		0.01	0.01 (B1), 0.01 (B6)
1374	Galeopsis tetraphyt	Galeopsis tetrahit L.	Wild	Angiosperm	Lamiaceae	Dicot	Bicellular	Dry	NA	Rosbakh	unpublished	0		Na	0	0.15	1.62			1.83						0.82 (7H2O)				0.99
1375	Galeopsis tetraphyt	Galeopsis tetrahit L.	Wild	Angiosperm	Lamiaceae	Dicot	Bicellular	Dry	NA	Rosbakh	unpublished	0		Na	0	0.07	0.81								5.44 (2H2O)	0.82 (7H2O)				0.99
1376	Galeopsis tetraphyt	Galeopsis tetrahit L.	Wild	Angiosperm	Lamiaceae	Dicot	Bicellular	Dry	NA	Rosbakh	unpublished	0		Na	0		0.81								5.99 (2H2O)	1.51 (7H2O)		0.1 (H2O)		9.4		0.63	2.35	0.01	0.02		0.01 (5H20)		0.04	5.16		0.01		0.01	0.01 (B1), 0.01 (B6)
1377	Galium album	Galium album Mill.	Wild	Angiosperm	Rubiaceae	Dicot	Tricellular	Dry	Starchless	Rosbakh	unpublished	0		Na	0		0.81								5.99 (2H2O)	1.51 (7H2O)		0.1 (H2O)		9.4		0.63	2.35	0.01	0.02		0.01 (5H20)		0.04	5.16		0.01		0.01	0.01 (B1), 0.01 (B6)
1378	Galium album	Galium album Mill.	Wild	Angiosperm	Rubiaceae	Dicot	Tricellular	Dry	Starchless	Rosbakh	unpublished	0		Na	0	0.27	1.62			1					1	1
1379	Gentiana asclepidea	Gentiana asclepiadea L.	Wild	Angiosperm	Gentianaceae	Dicot	Tricellular	Wet	NA	Rosbakh	unpublished	0		Na	0	0.16	1.62			1					1	1
1380	Gentiana aspera Hegetschw.	Gentianella aspera (Hegetschw. & Heer) Dostál ex Skalický, Chrtek & Gill	Wild	Angiosperm	Gentianaceae	Dicot	Tricellular	Wet	NA	Rosbakh	unpublished	0		Na	0	0.18	1.62			1					1	1
1381	Gentiana clusii Perr. & Songeon	Gentiana clusii Perr. & Songeon	Wild	Angiosperm	Gentianaceae	Dicot	Tricellular	Wet	NA	Rosbakh	unpublished	0		Na	0	0.16	1.62			1					1	1
1382	Gentiana clusii Perr. & Song.	Gentiana clusii Perr. & Songeon	Wild	Angiosperm	Gentianaceae	Dicot	Tricellular	Wet	NA	Rosbakh	unpublished	0		Na	0	0.16	1.62			1					1	1
1383	Gentiana clusii Perr. & Song.	Gentiana clusii Perr. & Songeon	Wild	Angiosperm	Gentianaceae	Dicot	Tricellular	Wet	NA	Rosbakh	unpublished	0		Na	0	0.15	1.62			1					1	1
1384	Gentiana germanica Willd.	Gentianella germanica (Willd.) Börner	Wild	Angiosperm	Gentianaceae	Dicot	Tricellular	Wet	NA	Rosbakh	unpublished	0		Na	0	0.2	1.62			1.83						0.82 (7H2O)				0.99
1385	Gentiana germanica Willd.	Gentianella germanica (Willd.) Börner	Wild	Angiosperm	Gentianaceae	Dicot	Tricellular	Wet	NA	Rosbakh	unpublished	0		Na	0	0.1	0.81								5.44 (2H2O)	0.82 (7H2O)				0.99
1386	Gentiana germanica Willd.	Gentianella germanica (Willd.) Börner	Wild	Angiosperm	Gentianaceae	Dicot	Tricellular	Wet	NA	Rosbakh	unpublished	0		Na	0		0.81								5.99 (2H2O)	1.51 (7H2O)		0.1 (H2O)		9.4		0.63	2.35	0.01	0.02		0.01 (5H20)		0.04	5.16		0.01		0.01	0.01 (B1), 0.01 (B6)
1387	Gentiana pannonica	Gentiana pannonica Scop.	Wild	Angiosperm	Gentianaceae	Dicot	Tricellular	Wet	NA	Rosbakh	unpublished	0		Na	0	0.16	1.62			1					1	1
1388	Gentiana verna	Gentiana verna L.	Wild	Angiosperm	Gentianaceae	Dicot	Tricellular	Wet	NA	Rosbakh	unpublished	0		Na	0	0.15	1.62			1					1	1
1389	Gentiana verna	Gentiana verna L.	Wild	Angiosperm	Gentianaceae	Dicot	Tricellular	Wet	NA	Rosbakh	unpublished	0		Na	0	0.16	1.62			1					1	1
1390	Gentiana verna	Gentiana verna L.	Wild	Angiosperm	Gentianaceae	Dicot	Tricellular	Wet	NA	Rosbakh	unpublished	0		Na	0	0.1	1.62			1.83						0.82 (7H2O)				0.99
1391	Gentiana verna	Gentiana verna L.	Wild	Angiosperm	Gentianaceae	Dicot	Tricellular	Wet	NA	Rosbakh	unpublished	0		Na	0	0.17	0.81								5.44 (2H2O)	0.82 (7H2O)				0.99
1392	Gentiana verna	Gentiana verna L.	Wild	Angiosperm	Gentianaceae	Dicot	Tricellular	Wet	NA	Rosbakh	unpublished	0		Na	0		0.81								5.99 (2H2O)	1.51 (7H2O)		0.1 (H2O)		9.4		0.63	2.35	0.01	0.02		0.01 (5H20)		0.04	5.16		0.01		0.01	0.01 (B1), 0.01 (B6)
1393	Gentiana verna	Gentiana verna L.	Wild	Angiosperm	Gentianaceae	Dicot	Tricellular	Wet	NA	Rosbakh	unpublished	0		Na	0		0.81								5.99 (2H2O)	1.51 (7H2O)		0.1 (H2O)		9.4		0.63	2.35	0.01	0.02		0.01 (5H20)		0.04	5.16		0.01		0.01	0.01 (B1), 0.01 (B6)
1394	Geum rivale	Geum rivale L.	Wild	Angiosperm	Rosaceae	Dicot	Bicellular	Dry	Starchy and starchless	Rosbakh	unpublished	0		Na	0	0.23	1.62			1					1	1
1395	Globularia cordifolia	Globularia cordifolia L.	Wild	Angiosperm	Plantaginaceae	Dicot	Bicellular	Dry	Starchy	Rosbakh	unpublished	0		Na	0	0.17	1.62			1					1	1
1396	Globularia elongata Hegetschw.	Globularia punctata Lapeyr.	Wild	Angiosperm	Plantaginaceae	Dicot	Bicellular	Dry	Starchy	Rosbakh	unpublished	0		Na	0	0.05	1.62			1.83						0.82 (7H2O)				0.99
1397	Globularia elongata Hegetschw.	Globularia punctata Lapeyr.	Wild	Angiosperm	Plantaginaceae	Dicot	Bicellular	Dry	Starchy	Rosbakh	unpublished	0		Na	0	0.1	0.81								5.44 (2H2O)	0.82 (7H2O)				0.99
1398	Globularia elongata Hegetschw.	Globularia punctata Lapeyr.	Wild	Angiosperm	Plantaginaceae	Dicot	Bicellular	Dry	Starchy	Rosbakh	unpublished	0		Na	0	0.2	0.17								1.66 (6H2O)					0.99																			0.75 TRIS
1399	Globularia elongata Hegetschw.	Globularia punctata Lapeyr.	Wild	Angiosperm	Plantaginaceae	Dicot	Bicellular	Dry	Starchy	Rosbakh	unpublished	0		Na	0		0.81								5.99 (2H2O)	1.51 (7H2O)		0.1 (H2O)		9.4		0.63	2.35	0.01	0.02		0.01 (5H20)		0.04	5.16		0.01		0.01	0.01 (B1), 0.01 (B6)
1400	Helianthemum nummularium	Helianthemum nummularium (L.) Mill.	Wild	Angiosperm	Cistaceae	Dicot	Bicellular	Dry	Starchy	Rosbakh	unpublished	0		Na	0		0.81								5.99 (2H2O)	1.51 (7H2O)		0.1 (H2O)		9.4		0.63	2.35	0.01	0.02		0.01 (5H20)		0.04	5.16		0.01		0.01	0.01 (B1), 0.01 (B6)
1401	Helianthemum nummularium	Helianthemum nummularium (L.) Mill.	Wild	Angiosperm	Cistaceae	Dicot	Bicellular	Dry	Starchy	Rosbakh	unpublished	0		Na	0		0.81								5.99 (2H2O)	1.51 (7H2O)		0.1 (H2O)		9.4		0.63	2.35	0.01	0.02		0.01 (5H20)		0.04	5.16		0.01		0.01	0.01 (B1), 0.01 (B6)
1402	Hepatica nobilis	Hepatica nobilis Mill.	Wild	Angiosperm	Ranunculaceae	Dicot	Bicellular	Dry	Starchy and starchless	Rosbakh	unpublished	0		Na	0	0.25	1.62			1.83						0.82 (7H2O)				0.99
1403	Hepatica nobilis	Hepatica nobilis Mill.	Wild	Angiosperm	Ranunculaceae	Dicot	Bicellular	Dry	Starchy and starchless	Rosbakh	unpublished	0		Na	0	0.25	0.81								5.44 (2H2O)	0.82 (7H2O)				0.99
1404	Hepatica nobilis	Hepatica nobilis Mill.	Wild	Angiosperm	Ranunculaceae	Dicot	Bicellular	Dry	Starchy and starchless	Rosbakh	unpublished	0		Na	0	0.2	0.17								1.66 (6H2O)					0.99																			0.75 TRIS
1405	Hepatica nobilis	Hepatica nobilis Mill.	Wild	Angiosperm	Ranunculaceae	Dicot	Bicellular	Dry	Starchy and starchless	Rosbakh	unpublished	0		Na	0		0.81								5.99 (2H2O)	1.51 (7H2O)		0.1 (H2O)		9.4		0.63	2.35	0.01	0.02		0.01 (5H20)		0.04	5.16		0.01		0.01	0.01 (B1), 0.01 (B6)
1406	Hippocrepis comosa	Hippocrepis comosa L.	Wild	Angiosperm	Fabaceae	Dicot	Bicellular	Wet	NA	Rosbakh	unpublished	0		Na	0	0.15	1.62			1.83						0.82 (7H2O)				0.99
1407	Hippocrepis comosa	Hippocrepis comosa L.	Wild	Angiosperm	Fabaceae	Dicot	Bicellular	Wet	NA	Rosbakh	unpublished	0		Na	0	0.15	0.81								5.44 (2H2O)	0.82 (7H2O)				0.99
1408	Hippocrepis comosa	Hippocrepis comosa L.	Wild	Angiosperm	Fabaceae	Dicot	Bicellular	Wet	NA	Rosbakh	unpublished	0		Na	0		0.81								5.99 (2H2O)	1.51 (7H2O)		0.1 (H2O)		9.4		0.63	2.35	0.01	0.02		0.01 (5H20)		0.04	5.16		0.01		0.01	0.01 (B1), 0.01 (B6)
1409	Hippocrepis comosa	Hippocrepis comosa L.	Wild	Angiosperm	Fabaceae	Dicot	Bicellular	Wet	NA	Rosbakh	unpublished	0		Na	0		0.81								5.99 (2H2O)	1.51 (7H2O)		0.1 (H2O)		9.4		0.63	2.35	0.01	0.02		0.01 (5H20)		0.04	5.16		0.01		0.01	0.01 (B1), 0.01 (B6)
1410	Hypericum maculatum	Hypericum maculatum Crantz	Wild	Angiosperm	Hypericaceae	Dicot	Bicellular	Dry	Starchy and starchless	Rosbakh	unpublished	0		Na	0	0.25	1.62			1					1	1
1411	Hypericum maculatum	Hypericum maculatum Crantz	Wild	Angiosperm	Hypericaceae	Dicot	Bicellular	Dry	Starchy and starchless	Rosbakh	unpublished	0		Na	0		0.81								5.99 (2H2O)	1.51 (7H2O)		0.1 (H2O)		9.4		0.63	2.35	0.01	0.02		0.01 (5H20)		0.04	5.16		0.01		0.01	0.01 (B1), 0.01 (B6)
1412	Hypericum perforatum	Hypericum perforatum L.	Wild	Angiosperm	Hypericaceae	Dicot	Bicellular	Dry	Starchy and starchless	Rosbakh	unpublished	0		Na	0	0.2	0.81								5.44 (2H2O)	0.82 (7H2O)				0.99
1413	Hypericum perforatum	Hypericum perforatum L.	Wild	Angiosperm	Hypericaceae	Dicot	Bicellular	Dry	Starchy and starchless	Rosbakh	unpublished	0		Na	0		0.81								5.99 (2H2O)	1.51 (7H2O)		0.1 (H2O)		9.4		0.63	2.35	0.01	0.02		0.01 (5H20)		0.04	5.16		0.01		0.01	0.01 (B1), 0.01 (B6)
1414	Hypericum perforatum	Hypericum perforatum L.	Wild	Angiosperm	Hypericaceae	Dicot	Bicellular	Dry	Starchy and starchless	Rosbakh	unpublished	0		Na	0	0.12	1.62			1					1	1
1415	Iris pseudoacorus	Iris pseudacorus L.	Wild	Angiosperm	Iridaceae	Monocot	Bicellular	Dry	Starchless	Rosbakh	unpublished	0		Na	0	0.17	1.62			1.83						0.82 (7H2O)				0.99
1416	Iris pseudoacorus	Iris pseudacorus L.	Wild	Angiosperm	Iridaceae	Monocot	Bicellular	Dry	Starchless	Rosbakh	unpublished	0		Na	0	0.17	0.81								5.44 (2H2O)	0.82 (7H2O)				0.99
1417	Iris pseudoacorus	Iris pseudacorus L.	Wild	Angiosperm	Iridaceae	Monocot	Bicellular	Dry	Starchless	Rosbakh	unpublished	0		Na	0	0.2	0.17								1.66 (6H2O)					0.99																			0.75 TRIS
1418	Iris pseudoacorus	Iris pseudacorus L.	Wild	Angiosperm	Iridaceae	Monocot	Bicellular	Dry	Starchless	Rosbakh	unpublished	0		Na	0		0.81								5.99 (2H2O)	1.51 (7H2O)		0.1 (H2O)		9.4		0.63	2.35	0.01	0.02		0.01 (5H20)		0.04	5.16		0.01		0.01	0.01 (B1), 0.01 (B6)
1419	Iris pseudoacorus	Iris pseudacorus L.	Wild	Angiosperm	Iridaceae	Monocot	Bicellular	Dry	Starchless	Rosbakh	unpublished	0		Na	0		0.81								5.99 (2H2O)	1.51 (7H2O)		0.1 (H2O)		9.4		0.63	2.35	0.01	0.02		0.01 (5H20)		0.04	5.16		0.01		0.01	0.01 (B1), 0.01 (B6)
1420	Iris pseudoacorus	Iris pseudacorus L.	Wild	Angiosperm	Iridaceae	Monocot	Bicellular	Dry	Starchless	Rosbakh	unpublished	0		Na	1% phytagel	0.15	1.62			1					1	1
1421	Lathyrus pratensis	Lathyrus pratensis L.	Wild	Angiosperm	Fabaceae	Dicot	Bicellular	Wet	NA	Rosbakh	unpublished	0		Na	0	0.25	1.62			1.83						0.82 (7H2O)				0.99
1422	Lathyrus pratensis	Lathyrus pratensis L.	Wild	Angiosperm	Fabaceae	Dicot	Bicellular	Wet	NA	Rosbakh	unpublished	0		Na	0	0.05	0.81								5.44 (2H2O)	0.82 (7H2O)				0.99
1423	Lathyrus pratensis	Lathyrus pratensis L.	Wild	Angiosperm	Fabaceae	Dicot	Bicellular	Wet	NA	Rosbakh	unpublished	0		Na	0		0.81								5.99 (2H2O)	1.51 (7H2O)		0.1 (H2O)		9.4		0.63	2.35	0.01	0.02		0.01 (5H20)		0.04	5.16		0.01		0.01	0.01 (B1), 0.01 (B6)
1424	Lathyrus pratensis	Lathyrus pratensis L.	Wild	Angiosperm	Fabaceae	Dicot	Bicellular	Wet	NA	Rosbakh	unpublished	0		Na	0	0.15	1.62			1					1	1
1425	Leucojum verum	Leucojum vernum L.	Wild	Angiosperm	Amaryllidaceae	Monocot	Bicellular	Dry	Starchless	Rosbakh	unpublished	0		Na	0	0.2	1.62			1.83						0.82 (7H2O)				0.99
1426	Leucojum verum	Leucojum vernum L.	Wild	Angiosperm	Amaryllidaceae	Monocot	Bicellular	Dry	Starchless	Rosbakh	unpublished	0		Na	0	0.1	0.81								5.44 (2H2O)	0.82 (7H2O)				0.99
1427	Leucojum verum	Leucojum vernum L.	Wild	Angiosperm	Amaryllidaceae	Monocot	Bicellular	Dry	Starchless	Rosbakh	unpublished	0		Na	0	0.1	0.17								1.66 (6H2O)					0.99																			0.75 TRIS
1428	Leucojum verum	Leucojum vernum L.	Wild	Angiosperm	Amaryllidaceae	Monocot	Bicellular	Dry	Starchless	Rosbakh	unpublished	0		Na	0		0.81								5.99 (2H2O)	1.51 (7H2O)		0.1 (H2O)		9.4		0.63	2.35	0.01	0.02		0.01 (5H20)		0.04	5.16		0.01		0.01	0.01 (B1), 0.01 (B6)
1429	Leucojum verum	Leucojum vernum L.	Wild	Angiosperm	Amaryllidaceae	Monocot	Bicellular	Dry	Starchless	Rosbakh	unpublished	0		Na	0		0.81								5.99 (2H2O)	1.51 (7H2O)		0.1 (H2O)		9.4		0.63	2.35	0.01	0.02		0.01 (5H20)		0.04	5.16		0.01		0.01	0.01 (B1), 0.01 (B6)
1430	Linaria vulgaris	Linaria vulgaris Mill.	Wild	Angiosperm	Plantaginaceae	Dicot	Bicellular	Dry	Starchy	Rosbakh	unpublished	0		Na	0		0.81								5.99 (2H2O)	1.51 (7H2O)		0.1 (H2O)		9.4		0.63	2.35	0.01	0.02		0.01 (5H20)		0.04	5.16		0.01		0.01	0.01 (B1), 0.01 (B6)
1431	Lotus corniculatus	Lotus corniculatus L.	Wild	Angiosperm	Fabaceae	Dicot	Bicellular	Wet	NA	Rosbakh	unpublished	0		Na	0	0.15	1.62			1.83						0.82 (7H2O)				0.99
1432	Lotus corniculatus	Lotus corniculatus L.	Wild	Angiosperm	Fabaceae	Dicot	Bicellular	Wet	NA	Rosbakh	unpublished	0		Na	0	0.15	0.81								5.44 (2H2O)	0.82 (7H2O)				0.99
1433	Lotus corniculatus	Lotus corniculatus L.	Wild	Angiosperm	Fabaceae	Dicot	Bicellular	Wet	NA	Rosbakh	unpublished	0		Na	0		0.81								5.99 (2H2O)	1.51 (7H2O)		0.1 (H2O)		9.4		0.63	2.35	0.01	0.02		0.01 (5H20)		0.04	5.16		0.01		0.01	0.01 (B1), 0.01 (B6)
1434	Lotus corniculatus	Lotus corniculatus L.	Wild	Angiosperm	Fabaceae	Dicot	Bicellular	Wet	NA	Rosbakh	unpublished	0		Na	0		0.81								5.99 (2H2O)	1.51 (7H2O)		0.1 (H2O)		9.4		0.63	2.35	0.01	0.02		0.01 (5H20)		0.04	5.16		0.01		0.01	0.01 (B1), 0.01 (B6)
1435	Lotus corniculatus	Lotus corniculatus L.	Wild	Angiosperm	Fabaceae	Dicot	Bicellular	Wet	NA	Rosbakh	unpublished	0		Na	0	0.25	0.81								5.44 (2H2O)	0.82 (7H2O)				0.99
1436	Lotus corniculatus	Lotus corniculatus L.	Wild	Angiosperm	Fabaceae	Dicot	Bicellular	Wet	NA	Rosbakh	unpublished	0		Na	0		0.81								5.99 (2H2O)	1.51 (7H2O)		0.1 (H2O)		9.4		0.63	2.35	0.01	0.02		0.01 (5H20)		0.04	5.16		0.01		0.01	0.01 (B1), 0.01 (B6)
1437	Lotus corniculatus	Lotus corniculatus L.	Wild	Angiosperm	Fabaceae	Dicot	Bicellular	Wet	NA	Rosbakh	unpublished	0		Na	0		0.81								5.99 (2H2O)	1.51 (7H2O)		0.1 (H2O)		9.4		0.63	2.35	0.01	0.02		0.01 (5H20)		0.04	5.16		0.01		0.01	0.01 (B1), 0.01 (B6)
1438	Lotus corniculatus	Lotus corniculatus L.	Wild	Angiosperm	Fabaceae	Dicot	Bicellular	Wet	NA	Rosbakh	unpublished	0		Na	0		0.81								5.99 (2H2O)	1.51 (7H2O)		0.1 (H2O)		9.4		0.63	2.35	0.01	0.02		0.01 (5H20)		0.04	5.16		0.01		0.01	0.01 (B1), 0.01 (B6)
1439	Lotus corniculatus	Lotus corniculatus L.	Wild	Angiosperm	Fabaceae	Dicot	Bicellular	Wet	NA	Rosbakh	unpublished	0		Na	0	0.05	1.62			1.83						0.82 (7H2O)				0.99
1440	Lotus corniculatus	Lotus corniculatus L.	Wild	Angiosperm	Fabaceae	Dicot	Bicellular	Wet	NA	Rosbakh	unpublished	0		Na	0	0.05	0.81								5.44 (2H2O)	0.82 (7H2O)				0.99
1441	Lychnis flos-cuculi L.	Silene flos-cuculi (L.) Greuter & Burdet	Wild	Angiosperm	Caryophyllaceae	Dicot	Tricellular	Dry	Starchless	Rosbakh	unpublished	0		Na	0	0.15	1.62			1					1	1
1442	Lysimachia thyrsiflora	Lysimachia thyrsiflora L.	Wild	Angiosperm	Primulaceae	Dicot	Bicellular	Dry	Starchless	Rosbakh	unpublished	0		Na	0	0.2	1.62			1					1	1
1443	Medicago falcata	Medicago falcata L.	Wild	Angiosperm	Fabaceae	Dicot	Bicellular	Wet	NA	Rosbakh	unpublished	0		Na	0		0.81								5.99 (2H2O)	1.51 (7H2O)		0.1 (H2O)		9.4		0.63	2.35	0.01	0.02		0.01 (5H20)		0.04	5.16		0.01		0.01	0.01 (B1), 0.01 (B6)
1444	Merculiaris perennis	Mercurialis perennis L.	Wild	Angiosperm	Euphorbiaceae	Dicot	Bicellular	Dry	Starchy	Rosbakh	unpublished	0		Na	0	0.15	1.62			1.83						0.82 (7H2O)				0.99
1445	Merculiaris perennis	Mercurialis perennis L.	Wild	Angiosperm	Euphorbiaceae	Dicot	Bicellular	Dry	Starchy	Rosbakh	unpublished	0		Na	0	0.15	0.81								5.44 (2H2O)	0.82 (7H2O)				0.99
1446	Merculiaris perennis	Mercurialis perennis L.	Wild	Angiosperm	Euphorbiaceae	Dicot	Bicellular	Dry	Starchy	Rosbakh	unpublished	0		Na	0	0.15	0.17								1.66 (6H2O)					0.99																			0.75 TRIS
1447	Merculiaris perennis	Mercurialis perennis L.	Wild	Angiosperm	Euphorbiaceae	Dicot	Bicellular	Dry	Starchy	Rosbakh	unpublished	0		Na	0		0.81								5.99 (2H2O)	1.51 (7H2O)		0.1 (H2O)		9.4		0.63	2.35	0.01	0.02		0.01 (5H20)		0.04	5.16		0.01		0.01	0.01 (B1), 0.01 (B6)
1448	Naumburgia thyrsiflora	Lysimachia thyrsiflora L.	Wild	Angiosperm	Primulaceae	Dicot	Bicellular	Dry	Starchless	Rosbakh	unpublished	0		Na	0		0.81								5.99 (2H2O)	1.51 (7H2O)		0.1 (H2O)		9.4		0.63	2.35	0.01	0.02		0.01 (5H20)		0.04	5.16		0.01		0.01	0.01 (B1), 0.01 (B6)
1449	Ononis repens L.	Ononis spinosa subsp. procurrens (Wallr.) Briq.	Wild	Angiosperm	Fabaceae	Dicot	Bicellular	Wet	NA	Rosbakh	unpublished	0		Na	0	0.2	1.62			1.83						0.82 (7H2O)				0.99
1450	Ononis repens L.	Ononis spinosa subsp. procurrens (Wallr.) Briq.	Wild	Angiosperm	Fabaceae	Dicot	Bicellular	Wet	NA	Rosbakh	unpublished	0		Na	0	0.25	0.81								5.44 (2H2O)	0.82 (7H2O)				0.99
1451	Ononis repens L.	Ononis spinosa subsp. procurrens (Wallr.) Briq.	Wild	Angiosperm	Fabaceae	Dicot	Bicellular	Wet	NA	Rosbakh	unpublished	0		Na	0		0.81								5.99 (2H2O)	1.51 (7H2O)		0.1 (H2O)		9.4		0.63	2.35	0.01	0.02		0.01 (5H20)		0.04	5.16		0.01		0.01	0.01 (B1), 0.01 (B6)
1452	Ononis repens L.	Ononis spinosa subsp. procurrens (Wallr.) Briq.	Wild	Angiosperm	Fabaceae	Dicot	Bicellular	Wet	NA	Rosbakh	unpublished	0		Na	0		0.81								5.99 (2H2O)	1.51 (7H2O)		0.1 (H2O)		9.4		0.63	2.35	0.01	0.02		0.01 (5H20)		0.04	5.16		0.01		0.01	0.01 (B1), 0.01 (B6)
1453	Orobanche lutea	Orobanche lutea Baumg.	Wild	Angiosperm	Orobanchaceae	Dicot	Bicellular	Dry	NA	Rosbakh	unpublished	0		Na	0	0.15	1.62			1.83						0.82 (7H2O)				0.99
1454	Orobanche lutea	Orobanche lutea Baumg.	Wild	Angiosperm	Orobanchaceae	Dicot	Bicellular	Dry	NA	Rosbakh	unpublished	0		Na	0	0.15	0.81								5.44 (2H2O)	0.82 (7H2O)				0.99
1455	Orobanche lutea	Orobanche lutea Baumg.	Wild	Angiosperm	Orobanchaceae	Dicot	Bicellular	Dry	NA	Rosbakh	unpublished	0		Na	0	0.1	0.17								1.66 (6H2O)					0.99																			0.75 TRIS
1456	Orobanche lutea	Orobanche lutea Baumg.	Wild	Angiosperm	Orobanchaceae	Dicot	Bicellular	Dry	NA	Rosbakh	unpublished	0		Na	0		0.81								5.99 (2H2O)	1.51 (7H2O)		0.1 (H2O)		9.4		0.63	2.35	0.01	0.02		0.01 (5H20)		0.04	5.16		0.01		0.01	0.01 (B1), 0.01 (B6)
1457	Orobanche lutea	Orobanche lutea Baumg.	Wild	Angiosperm	Orobanchaceae	Dicot	Bicellular	Dry	NA	Rosbakh	unpublished	0		Na	0		0.81								5.99 (2H2O)	1.51 (7H2O)		0.1 (H2O)		9.4		0.63	2.35	0.01	0.02		0.01 (5H20)		0.04	5.16		0.01		0.01	0.01 (B1), 0.01 (B6)
1458	Orobanche lutea	Orobanche lutea Baumg.	Wild	Angiosperm	Orobanchaceae	Dicot	Bicellular	Dry	NA	Rosbakh	unpublished	0		Na	1% phytagel	0.05	1.62			1					1	1
1459	Parnassia palustris	Parnassia palustris L.	Wild	Angiosperm	Celastraceae	Dicot	Bicellular	Dry	Starchless	Rosbakh	unpublished	0		Na	0	0.16	1.62			1					1	1
1460	Pedicularis palustris	Pedicularis palustris L.	Wild	Angiosperm	Orobanchaceae	Dicot	Bicellular	Dry	NA	Rosbakh	unpublished	0		Na	0	0.1	1.62			1.83						0.82 (7H2O)				0.99
1461	Pedicularis palustris	Pedicularis palustris L.	Wild	Angiosperm	Orobanchaceae	Dicot	Bicellular	Dry	NA	Rosbakh	unpublished	0		Na	0	0.12	0.81								5.44 (2H2O)	0.82 (7H2O)				0.99
1462	Pedicularis palustris	Pedicularis palustris L.	Wild	Angiosperm	Orobanchaceae	Dicot	Bicellular	Dry	NA	Rosbakh	unpublished	0		Na	0		0.81								5.99 (2H2O)	1.51 (7H2O)		0.1 (H2O)		9.4		0.63	2.35	0.01	0.02		0.01 (5H20)		0.04	5.16		0.01		0.01	0.01 (B1), 0.01 (B6)
1463	Pedicularis palustris	Pedicularis palustris L.	Wild	Angiosperm	Orobanchaceae	Dicot	Bicellular	Dry	NA	Rosbakh	unpublished	0		Na	0		0.81								5.99 (2H2O)	1.51 (7H2O)		0.1 (H2O)		9.4		0.63	2.35	0.01	0.02		0.01 (5H20)		0.04	5.16		0.01		0.01	0.01 (B1), 0.01 (B6)
1464	Phyteuma orbiculare	Phyteuma orbiculare L.	Wild	Angiosperm	Campanulaceae	Dicot	Bicellular	Dry	Starchless	Rosbakh	unpublished	0		Na	0	0.2	1.62			1					1	1
1465	Pinus mugo	Pinus mugo Turra	Wild	Gymnosperm	Pinaceae				NA	Rosbakh	unpublished	0		Na	0	0.1	1.62			1					1	1
1466	Plantago lanceolata	Plantago lanceolata L.	Wild	Angiosperm	Plantaginaceae	Dicot	Mixed	Dry	Starchy	Rosbakh	unpublished	0		Na	0	0.25	0.81								5.44 (2H2O)	0.82 (7H2O)				0.99
1467	Plantago lanceolata	Plantago lanceolata L.	Wild	Angiosperm	Plantaginaceae	Dicot	Mixed	Dry	Starchy	Rosbakh	unpublished	0		Na	0	0.1	1.62			1.83						0.82 (7H2O)				0.99
1468	Plantago lanceolata	Plantago lanceolata L.	Wild	Angiosperm	Plantaginaceae	Dicot	Mixed	Dry	Starchy	Rosbakh	unpublished	0		Na	0		0.81								5.99 (2H2O)	1.51 (7H2O)		0.1 (H2O)		9.4		0.63	2.35	0.01	0.02		0.01 (5H20)		0.04	5.16		0.01		0.01	0.01 (B1), 0.01 (B6)
1469	Plantago lanceolata	Plantago lanceolata L.	Wild	Angiosperm	Plantaginaceae	Dicot	Mixed	Dry	Starchy	Rosbakh	unpublished	0		Na	0	0.15	1.62			1.83						0.82 (7H2O)				0.99
1470	Plantago lanceolata	Plantago lanceolata L.	Wild	Angiosperm	Plantaginaceae	Dicot	Mixed	Dry	Starchy	Rosbakh	unpublished	0		Na	0	0.15	0.81								5.44 (2H2O)	0.82 (7H2O)				0.99
1471	Plantago lanceolata	Plantago lanceolata L.	Wild	Angiosperm	Plantaginaceae	Dicot	Mixed	Dry	Starchy	Rosbakh	unpublished	0		Na	0		0.81								5.99 (2H2O)	1.51 (7H2O)		0.1 (H2O)		9.4		0.63	2.35	0.01	0.02		0.01 (5H20)		0.04	5.16		0.01		0.01	0.01 (B1), 0.01 (B6)
1472	Plantago media	Plantago media L.	Wild	Angiosperm	Plantaginaceae	Dicot	Mixed	Dry	Starchy	Rosbakh	unpublished	0		Na	0	0.16	1.62			1					1	1
1473	Plantago media	Plantago media L.	Wild	Angiosperm	Plantaginaceae	Dicot	Mixed	Dry	Starchy	Rosbakh	unpublished	0		Na	0	0.15	1.62			1.83						0.82 (7H2O)				0.99
1474	Plantago media	Plantago media L.	Wild	Angiosperm	Plantaginaceae	Dicot	Mixed	Dry	Starchy	Rosbakh	unpublished	0		Na	0	0.2	0.81								5.44 (2H2O)	0.82 (7H2O)				0.99
1475	Plantago media	Plantago media L.	Wild	Angiosperm	Plantaginaceae	Dicot	Mixed	Dry	Starchy	Rosbakh	unpublished	0		Na	0		0.81								5.99 (2H2O)	1.51 (7H2O)		0.1 (H2O)		9.4		0.63	2.35	0.01	0.02		0.01 (5H20)		0.04	5.16		0.01		0.01	0.01 (B1), 0.01 (B6)
1476	Plantago media	Plantago media L.	Wild	Angiosperm	Plantaginaceae	Dicot	Mixed	Dry	Starchy	Rosbakh	unpublished	0		Na	0		0.81								5.99 (2H2O)	1.51 (7H2O)		0.1 (H2O)		9.4		0.63	2.35	0.01	0.02		0.01 (5H20)		0.04	5.16		0.01		0.01	0.01 (B1), 0.01 (B6)
1477	Plantago media	Plantago media L.	Wild	Angiosperm	Plantaginaceae	Dicot	Mixed	Dry	Starchy	Rosbakh	unpublished	0		Na	0	0.1	1.62			1.83						0.82 (7H2O)				0.99
1478	Plantago media	Plantago media L.	Wild	Angiosperm	Plantaginaceae	Dicot	Mixed	Dry	Starchy	Rosbakh	unpublished	0		Na	0	0.05	0.81								5.44 (2H2O)	0.82 (7H2O)				0.99
1479	Plantago media	Plantago media L.	Wild	Angiosperm	Plantaginaceae	Dicot	Mixed	Dry	Starchy	Rosbakh	unpublished	0		Na	0		0.81								5.99 (2H2O)	1.51 (7H2O)		0.1 (H2O)		9.4		0.63	2.35	0.01	0.02		0.01 (5H20)		0.04	5.16		0.01		0.01	0.01 (B1), 0.01 (B6)
1480	Plantago media	Plantago media L.	Wild	Angiosperm	Plantaginaceae	Dicot	Mixed	Dry	Starchy	Rosbakh	unpublished	0		Na	0		0.81								5.99 (2H2O)	1.51 (7H2O)		0.1 (H2O)		9.4		0.63	2.35	0.01	0.02		0.01 (5H20)		0.04	5.16		0.01		0.01	0.01 (B1), 0.01 (B6)
1481	Plantago media	Plantago media L.	Wild	Angiosperm	Plantaginaceae	Dicot	Mixed	Dry	Starchy	Rosbakh	unpublished	0		Na	0	0.15	0.81								5.44 (2H2O)	0.82 (7H2O)				0.99
1482	Polygala chamaebuxus	Polygala chamaebuxus L.	Wild	Angiosperm	Polygalaceae	Dicot	Tricellular	Dry	NA	Rosbakh	unpublished	0		Na	0	0.27	1.62			1.83						0.82 (7H2O)				0.99
1483	Polygala chamaebuxus	Polygala chamaebuxus L.	Wild	Angiosperm	Polygalaceae	Dicot	Tricellular	Dry	NA	Rosbakh	unpublished	0		Na	0	0.2	0.81								5.44 (2H2O)	0.82 (7H2O)				0.99
1484	Polygala chamaebuxus	Polygala chamaebuxus L.	Wild	Angiosperm	Polygalaceae	Dicot	Tricellular	Dry	NA	Rosbakh	unpublished	0		Na	0		0.81								5.99 (2H2O)	1.51 (7H2O)		0.1 (H2O)		9.4		0.63	2.35	0.01	0.02		0.01 (5H20)		0.04	5.16		0.01		0.01	0.01 (B1), 0.01 (B6)
1485	Polygala chamaebuxus	Polygala chamaebuxus L.	Wild	Angiosperm	Polygalaceae	Dicot	Tricellular	Dry	NA	Rosbakh	unpublished	0		Na	0		0.81								5.99 (2H2O)	1.51 (7H2O)		0.1 (H2O)		9.4		0.63	2.35	0.01	0.02		0.01 (5H20)		0.04	5.16		0.01		0.01	0.01 (B1), 0.01 (B6)
1486	Polygala chamaebuxus	Polygala chamaebuxus L.	Wild	Angiosperm	Polygalaceae	Dicot	Tricellular	Dry	NA	Rosbakh	unpublished	0		Na	0	0.24	1.62			1					1	1
1487	Potentilla erecta	Potentilla erecta (L.) Raeusch.	Wild	Angiosperm	Rosaceae	Dicot	Bicellular	Dry	Starchy and starchless	Rosbakh	unpublished	0		Na	0	0.15	1.62			1					1	1
1488	Primula minima	Primula minima L.	Wild	Angiosperm	Primulaceae	Dicot	Bicellular	Dry	Starchless	Rosbakh	unpublished	0		Na	0	0.19	1.62			1					1	1
1489	Primula veris	Primula veris L.	Wild	Angiosperm	Primulaceae	Dicot	Bicellular	Dry	Starchless	Rosbakh	unpublished	0		Na	0	0.15	1.62			1.83						0.82 (7H2O)				0.99
1490	Primula veris	Primula veris L.	Wild	Angiosperm	Primulaceae	Dicot	Bicellular	Dry	Starchless	Rosbakh	unpublished	0		Na	0	0.07	0.81								5.44 (2H2O)	0.82 (7H2O)				0.99
1491	Primula veris	Primula veris L.	Wild	Angiosperm	Primulaceae	Dicot	Bicellular	Dry	Starchless	Rosbakh	unpublished	0		Na	0		0.81								5.99 (2H2O)	1.51 (7H2O)		0.1 (H2O)		9.4		0.63	2.35	0.01	0.02		0.01 (5H20)		0.04	5.16		0.01		0.01	0.01 (B1), 0.01 (B6)
1492	Primula veris	Primula veris L.	Wild	Angiosperm	Primulaceae	Dicot	Bicellular	Dry	Starchless	Rosbakh	unpublished	0		Na	0	0.15	1.62			1					1	1
1493	Prunus avium	Prunus avium (L.) L.	Wild	Angiosperm	Rosaceae	Dicot	Bicellular	Wet	Starchy and starchless	Rosbakh	unpublished	0		Na	0	0.2	1.62			1.83						0.82 (7H2O)				0.99
1494	Pulsatilla patens (L.) Mill.	Anemone patens L.	Wild	Angiosperm	Ranunculaceae	Dicot	Bicellular	Dry	Starchy and starchless	Rosbakh	unpublished	0		Na	0	0.21	1.62			1					1	1
1495	Pulsatilla vulgaris Mill.	Anemone pulsatilla L.	Wild	Angiosperm	Ranunculaceae	Dicot	Bicellular	Dry	Starchy and starchless	Rosbakh	unpublished	0		Na	0		0.81								5.99 (2H2O)	1.51 (7H2O)		0.1 (H2O)		9.4		0.63	2.35	0.01	0.02		0.01 (5H20)		0.04	5.16		0.01		0.01	0.01 (B1), 0.01 (B6)
1496	Pulsatilla vulgaris Mill.	Anemone pulsatilla L.	Wild	Angiosperm	Ranunculaceae	Dicot	Bicellular	Dry	Starchy and starchless	Rosbakh	unpublished	0		Na	0	0.15	1.62			1.83						0.82 (7H2O)				0.99
1497	Pulsatilla vulgaris Mill.	Anemone pulsatilla L.	Wild	Angiosperm	Ranunculaceae	Dicot	Bicellular	Dry	Starchy and starchless	Rosbakh	unpublished	0		Na	0	0.2	0.81								5.44 (2H2O)	0.82 (7H2O)				0.99
1498	Pulsatilla vulgaris Mill.	Anemone pulsatilla L.	Wild	Angiosperm	Ranunculaceae	Dicot	Bicellular	Dry	Starchy and starchless	Rosbakh	unpublished	0		Na	0	0.12	0.17								1.66 (6H2O)					0.99																			0.75 TRIS
1499	Pulsatilla vulgaris Mill.	Anemone pulsatilla L.	Wild	Angiosperm	Ranunculaceae	Dicot	Bicellular	Dry	Starchy and starchless	Rosbakh	unpublished	0		Na	0		0.81								5.99 (2H2O)	1.51 (7H2O)		0.1 (H2O)		9.4		0.63	2.35	0.01	0.02		0.01 (5H20)		0.04	5.16		0.01		0.01	0.01 (B1), 0.01 (B6)
1500	Pulsatilla vulgaris Mill.	Anemone pulsatilla L.	Wild	Angiosperm	Ranunculaceae	Dicot	Bicellular	Dry	Starchy and starchless	Rosbakh	unpublished	0		Na	1% phytagel	0.2	1.62			1					1	1
1501	Quercus robur L.	Quercus robur L.	Wild	Angiosperm	Fagaceae	Dicot	Bicellular	Dry	Starchless	Rosbakh	unpublished	0		Na	0	0.2	1.62			1.83						0.82 (7H2O)				0.99
1502	Ranunculus alpestris	Ranunculus alpestris L.	Wild	Angiosperm	Ranunculaceae	Dicot	Bicellular	Dry	Starchy and starchless	Rosbakh	unpublished	0		Na	0	0.16	1.62			1					1	1
1503	Ranunculus alpestris	Ranunculus alpestris L.	Wild	Angiosperm	Ranunculaceae	Dicot	Bicellular	Dry	Starchy and starchless	Rosbakh	unpublished	0		Na	0	0.14	1.62			1					1	1
1504	Ranunculus bulbosus	Ranunculus bulbosus L.	Wild	Angiosperm	Ranunculaceae	Dicot	Bicellular	Dry	Starchy and starchless	Rosbakh	unpublished	0		Na	0	0.1	1.62			1.83						0.82 (7H2O)				0.99
1505	Ranunculus bulbosus	Ranunculus bulbosus L.	Wild	Angiosperm	Ranunculaceae	Dicot	Bicellular	Dry	Starchy and starchless	Rosbakh	unpublished	0		Na	0	0.05	0.81								5.44 (2H2O)	0.82 (7H2O)				0.99
1506	Ranunculus bulbosus	Ranunculus bulbosus L.	Wild	Angiosperm	Ranunculaceae	Dicot	Bicellular	Dry	Starchy and starchless	Rosbakh	unpublished	0		Na	0	0.15	1.62			1.83						0.82 (7H2O)				0.99
1507	Ranunculus bulbosus	Ranunculus bulbosus L.	Wild	Angiosperm	Ranunculaceae	Dicot	Bicellular	Dry	Starchy and starchless	Rosbakh	unpublished	0		Na	0	0.1	0.81								5.44 (2H2O)	0.82 (7H2O)				0.99
1508	Ranunculus bulbosus	Ranunculus bulbosus L.	Wild	Angiosperm	Ranunculaceae	Dicot	Bicellular	Dry	Starchy and starchless	Rosbakh	unpublished	0		Na	0		0.81								5.99 (2H2O)	1.51 (7H2O)		0.1 (H2O)		9.4		0.63	2.35	0.01	0.02		0.01 (5H20)		0.04	5.16		0.01		0.01	0.01 (B1), 0.01 (B6)
1509	Ranunculus montanus	Ranunculus montanus Willd.	Wild	Angiosperm	Ranunculaceae	Dicot	Bicellular	Dry	Starchy and starchless	Rosbakh	unpublished	0		Na	0	0.15	1.62			1					1	1
1510	Ranunculus montanus	Ranunculus montanus Willd.	Wild	Angiosperm	Ranunculaceae	Dicot	Bicellular	Dry	Starchy and starchless	Rosbakh	unpublished	0		Na	0	0.14	1.62			1					1	1
1511	Ranunculus nemorosus DC.	Ranunculus serpens subsp. nemorosus (DC.) G.López	Wild	Angiosperm	Ranunculaceae	Dicot	Bicellular	Dry	Starchy and starchless	Rosbakh	unpublished	0		Na	0	0.18	1.62			1					1	1
1512	Ranunculus polyanthemophyllus W.Koch & H.E.Hess	Ranunculus serpens subsp. polyanthemophyllus (W.Koch & H.E.Hess) Kerguélen	Wild	Angiosperm	Ranunculaceae	Dicot	Bicellular	Dry	Starchy and starchless	Rosbakh	unpublished	0		Na	0	0.14	1.62			1					1	1
1513	Ranunculus repens	Ranunculus repens L.	Wild	Angiosperm	Ranunculaceae	Dicot	Bicellular	Dry	Starchy and starchless	Rosbakh	unpublished	0		Na	0	0.1	1.62			1					1	1
1514	Rhinanthus serotinus	Rhinanthus serotinus (Schönh.) Oborny	Wild	Angiosperm	Orobanchaceae	Dicot	Bicellular	Dry	NA	Rosbakh	unpublished	0		Na	0	0.15	0.81								5.44 (2H2O)	0.82 (7H2O)				0.99
1515	Rhododendron hirsutum	Rhododendron hirsutum L.	Wild	Angiosperm	Ericaceae	Dicot	Bicellular	Wet	Starchless	Rosbakh	unpublished	0		Na	0	0.18	1.62			1					1	1
1516	Rumex acetosa	Rumex acetosa L.	Wild	Angiosperm	Polygonaceae	Dicot	Tricellular	Dry	Starchy	Rosbakh	unpublished	0		Na	0	0.2	1.62			1.83						0.82 (7H2O)				0.99
1517	Rumex acetosa	Rumex acetosa L.	Wild	Angiosperm	Polygonaceae	Dicot	Tricellular	Dry	Starchy	Rosbakh	unpublished	0		Na	0	0.2	0.81								5.44 (2H2O)	0.82 (7H2O)				0.99
1518	Rumex acetosa	Rumex acetosa L.	Wild	Angiosperm	Polygonaceae	Dicot	Tricellular	Dry	Starchy	Rosbakh	unpublished	0		Na	0		0.81								5.99 (2H2O)	1.51 (7H2O)		0.1 (H2O)		9.4		0.63	2.35	0.01	0.02		0.01 (5H20)		0.04	5.16		0.01		0.01	0.01 (B1), 0.01 (B6)
1519	Rumex acetosa	Rumex acetosa L.	Wild	Angiosperm	Polygonaceae	Dicot	Tricellular	Dry	Starchy	Rosbakh	unpublished	0		Na	0	0.15	1.62			1					1	1
1520	Salix caprea	Salix caprea L.	Wild	Angiosperm	Salicaceae	Dicot	Bicellular	Dry	Starchless	Rosbakh	unpublished	0		Na	0	0.1	1.62			1.83						0.82 (7H2O)				0.99
1521	Salix caprea	Salix caprea L.	Wild	Angiosperm	Salicaceae	Dicot	Bicellular	Dry	Starchless	Rosbakh	unpublished	0		Na	0	0.1	0.81								5.44 (2H2O)	0.82 (7H2O)				0.99
1522	Salix caprea	Salix caprea L.	Wild	Angiosperm	Salicaceae	Dicot	Bicellular	Dry	Starchless	Rosbakh	unpublished	0		Na	0	0.15	0.17								1.66 (6H2O)					0.99																			0.75 TRIS
1523	Salix caprea	Salix caprea L.	Wild	Angiosperm	Salicaceae	Dicot	Bicellular	Dry	Starchless	Rosbakh	unpublished	0		Na	0		0.81								5.99 (2H2O)	1.51 (7H2O)		0.1 (H2O)		9.4		0.63	2.35	0.01	0.02		0.01 (5H20)		0.04	5.16		0.01		0.01	0.01 (B1), 0.01 (B6)
1524	Salix caprea	Salix caprea L.	Wild	Angiosperm	Salicaceae	Dicot	Bicellular	Dry	Starchless	Rosbakh	unpublished	0		Na	0		0.81								5.99 (2H2O)	1.51 (7H2O)		0.1 (H2O)		9.4		0.63	2.35	0.01	0.02		0.01 (5H20)		0.04	5.16		0.01		0.01	0.01 (B1), 0.01 (B6)
1525	Salix caprea	Salix caprea L.	Wild	Angiosperm	Salicaceae	Dicot	Bicellular	Dry	Starchless	Rosbakh	unpublished	0		Na	1% phytagel	0.2	1.62			1					1	1
1526	Salix purpurea	Salix purpurea L.	Wild	Angiosperm	Salicaceae	Dicot	Bicellular	Dry	Starchless	Rosbakh	unpublished	0		Na	0	0.1	1.62			1.83						0.82 (7H2O)				0.99
1527	Salix purpurea	Salix purpurea L.	Wild	Angiosperm	Salicaceae	Dicot	Bicellular	Dry	Starchless	Rosbakh	unpublished	0		Na	0	0.1	0.81								5.44 (2H2O)	0.82 (7H2O)				0.99
1528	Salix purpurea	Salix purpurea L.	Wild	Angiosperm	Salicaceae	Dicot	Bicellular	Dry	Starchless	Rosbakh	unpublished	0		Na	0	0.15	0.17								1.66 (6H2O)					0.99																			0.75 TRIS
1529	Salix purpurea	Salix purpurea L.	Wild	Angiosperm	Salicaceae	Dicot	Bicellular	Dry	Starchless	Rosbakh	unpublished	0		Na	0		0.81								5.99 (2H2O)	1.51 (7H2O)		0.1 (H2O)		9.4		0.63	2.35	0.01	0.02		0.01 (5H20)		0.04	5.16		0.01		0.01	0.01 (B1), 0.01 (B6)
1530	Salix purpurea	Salix purpurea L.	Wild	Angiosperm	Salicaceae	Dicot	Bicellular	Dry	Starchless	Rosbakh	unpublished	0		Na	0		0.81								5.99 (2H2O)	1.51 (7H2O)		0.1 (H2O)		9.4		0.63	2.35	0.01	0.02		0.01 (5H20)		0.04	5.16		0.01		0.01	0.01 (B1), 0.01 (B6)
1531	Salix purpurea	Salix purpurea L.	Wild	Angiosperm	Salicaceae	Dicot	Bicellular	Dry	Starchless	Rosbakh	unpublished	0		Na	1% phytagel	0.2	1.62			1					1	1
1532	Salvia pratensis	Salvia pratensis L.	Wild	Angiosperm	Lamiaceae	Dicot	Tricellular	Dry	NA	Rosbakh	unpublished	0		Na	0		0.81								5.99 (2H2O)	1.51 (7H2O)		0.1 (H2O)		9.4		0.63	2.35	0.01	0.02		0.01 (5H20)		0.04	5.16		0.01		0.01	0.01 (B1), 0.01 (B6)
1533	Scilla bifolia	Scilla bifolia L.	Wild	Angiosperm	Asparagaceae	Monocot	Bicellular	Dry	NA	Rosbakh	unpublished	0		Na	0	0.05	1.62			1.83						0.82 (7H2O)				0.99
1534	Scilla bifolia	Scilla bifolia L.	Wild	Angiosperm	Asparagaceae	Monocot	Bicellular	Dry	NA	Rosbakh	unpublished	0		Na	0	0.15	0.81								5.44 (2H2O)	0.82 (7H2O)				0.99
1535	Scilla bifolia	Scilla bifolia L.	Wild	Angiosperm	Asparagaceae	Monocot	Bicellular	Dry	NA	Rosbakh	unpublished	0		Na	0	0.15	0.17								1.66 (6H2O)					0.99																			0.75 TRIS
1536	Scilla bifolia	Scilla bifolia L.	Wild	Angiosperm	Asparagaceae	Monocot	Bicellular	Dry	NA	Rosbakh	unpublished	0		Na	0		0.81								5.99 (2H2O)	1.51 (7H2O)		0.1 (H2O)		9.4		0.63	2.35	0.01	0.02		0.01 (5H20)		0.04	5.16		0.01		0.01	0.01 (B1), 0.01 (B6)
1537	Scilla bifolia	Scilla bifolia L.	Wild	Angiosperm	Asparagaceae	Monocot	Bicellular	Dry	NA	Rosbakh	unpublished	0		Na	0		0.81								5.99 (2H2O)	1.51 (7H2O)		0.1 (H2O)		9.4		0.63	2.35	0.01	0.02		0.01 (5H20)		0.04	5.16		0.01		0.01	0.01 (B1), 0.01 (B6)
1538	Securigera varia	Securigera varia (L.)Lassen	Wild	Angiosperm	Fabaceae	Dicot	Bicellular	Wet	NA	Rosbakh	unpublished	0		Na	0	0.2	1.62			1.83						0.82 (7H2O)				0.99
1539	Securigera varia	Securigera varia (L.)Lassen	Wild	Angiosperm	Fabaceae	Dicot	Bicellular	Wet	NA	Rosbakh	unpublished	0		Na	0	0.15	0.81								5.44 (2H2O)	0.82 (7H2O)				0.99
[truncated: 33 more rows]
[truncated: 11 more columns]
